# Supplementary material for: Combinatorial Cis-regulation in Saccharomyces Species
Source: Oxford University Press journal article supplement (doi:10.1534/g3.115.024331), 2016-01-26

## Supplemental Material

Supplemental Table S1. CRE combinations and supporting experimental evidence. Literature reference provided for datasets that indicate significant interaction between CREs (p-value <0.01). ‘Ref’ column provides reference for known interactions mentioned in the main text. References listed here are provided at the end of the Table. (Data also available in TableS1.xls)

| Pair       | ChIP           | Path      | Expression          | Orient    | Ref  |
|------------|----------------|-----------|---------------------|-----------|------|
| ABF1xCBF1  | (27) (26)      | (35)      | (31) (32)           |           |      |
| ABF1xUME6  | (27)           | (34)      | (32)                |           |      |
| AFT2xRAP1  | (27)           | (34) (35) | (29)                |           |      |
| AFT2xRCS1  | (27)           | (34) (35) | (31) (32)           | (29)      |      |
| AFT2xSFP1  | (27)           | (34) (35) | (29) (30)           | (30)      |      |
| ARG80xBAS1 | (27) (26)      | (34) (35) | (29) (30) (31) (32) |           |      |
| ARG80xGCN4 | (27) (26)      | (34) (35) | (29) (30) (31)      |           | (49) |
| ARG80xSUT1 | (27)           | (34) (35) | (29) (31) (32)      |           |      |
| ARG81xBAS1 | (27) (26)      | (34)      | (30) (31)           |           |      |
| ARG81xGCN4 | (27) (26)      | (34)      | (29)                | (29)      |      |
| BAS1xGCN4  | (27) (26) (28) | (34) (35) | (29) (32)           |           | (50) |
| BAS1xRTG3  | (27) (26)      | (34) (35) | (29) (31) (32)      |           |      |
| CAD1xYAP7  | (27)           | (34)      | (30)                |           |      |
| CBF1xGCN4  | (27)           | (34) (35) | (29) (30) (31) (32) |           |      |
| CBF1xINO2  | (27) (26)      | (34)      | (31)                | (30)      |      |
| CBF1xINO4  | (27) (26)      | (34) (35) | (31)                |           |      |
| CBF1xMET32 | (27)           | (34) (35) | (29) (30) (31)      |           | (58) |
| CBF1xMET4  | (27) (26)      | (34) (35) | (29) (30) (31)      |           |      |
| CIN5xMIG3  | (27)           | (35)      | (30) (31)           |           |      |
| CUP9xRAP1  | (27) (26)      | (35)      | (32)                |           |      |
| DAL82xUME6 | (27)           | (34)      | (29)                |           |      |
| DIG1xSTE12 | (27) (26) (28) | (34)      | (29) (31)           |           | (44) |
| EDS1xHSF1  | (27)           | (34)      | (31)                | (29)      |      |
| FHL1xRAP1  | (27) (26) (28) | (34) (35) | (29) (30)           |           | (42) |
| FHL1xRPH1  | (27) (26) (28) | (35)      | (29)                |           |      |
| FHL1xSFP1  | (27) (26) (28) | (34) (35) | (29) (30) (31)      | (30) (29) | (43) |
| FKH1xFKH2  | (27) (26) (28) | (34)      | (32)                |           |      |
| FKH1xMBP1  | (27) (26)      | (34)      | (29) (30) (31) (32) |           | (48) |
| FKH1xMCM1  | (27) (26)      | (35)      | (30)                |           | (56) |
| FKH1xSWI6  | (27) (26)      | (34)      | (29) (30) (31)      | (29)      | (47) |
| FKH2xMBP1  | (27) (26)      | (34) (35) | (29) (30) (31)      |           |      |
| FKH2xMCM1  | (27) (26)      | (35)      | (30)                |           | (56) |

|            |                |           |                     |           |      |
|------------|----------------|-----------|---------------------|-----------|------|
| FKH2xSTB1  | (27) (26)      | (34)      | (29) (30) (31)      | (30) (29) |      |
| FKH2xSWI6  | (27) (26)      | (34)      | (29) (30) (31)      | (29)      |      |
| FZF1xSPT23 | (27)           | (34)      | (29) (32)           | (30) (29) |      |
| GAL4xSTP1  | (28)           | (34) (35) | (32)                |           |      |
| GCN4xLEU3  | (27) (26) (28) | (34) (35) | (30) (31) (32)      |           |      |
| GCN4xRTG3  | (27) (26)      | (34) (35) | (29) (32)           | (30) (29) |      |
| GCR1xGCR2  | (27) (26)      | (34)      | (32)                |           | (60) |
| GCR1xRAP1  | (27) (26) (28) | (34) (35) | (30) (31) (32)      |           | (60) |
| GCR2xTHI2  | (27) (26)      | (34) (35) | (31) (32)           |           |      |
| GLN3xGZF3  | (27)           | (35)      | (32)                |           |      |
| HAP1xPDR1  | (27)           | (35)      | (29) (31)           |           |      |
| HAP1xSUT1  | (27)           | (34)      | (29)                |           |      |
| HAP3xHAP4  | (27) (26)      | (34) (35) | (30) (31)           |           |      |
| HAP3xUGA3  | (26)           | (35)      | (32)                |           |      |
| HAP4xHAP5  | (27) (26)      | (34) (35) | (30) (31)           |           |      |
| HMS1xTYE7  | (27)           | (34)      | (31) (32)           |           |      |
| HSF1xXBP1  | (27)           | (34)      | (29) (30) (31)      |           |      |
| INO2xINO4  | (27) (26) (28) | (34) (35) | (32)                |           | (57) |
| LEU3xSKN7  | (27) (28)      | (35)      | (32)                |           |      |
| LEU3xUME6  | (28)           | (34) (35) | (31) (32)           |           |      |
| MBP1xNDD1  | (27) (26)      | (35)      | (29) (31)           |           |      |
| MBP1xSTB1  | (27) (26)      | (34) (35) | (29) (30) (31) (32) | (30)      | (40) |
| MBP1xSWI4  | (27) (26)      | (34) (35) | (29) (30) (31) (32) | (30)      | (39) |
| MBP1xSWI6  | (27) (26)      | (34) (35) | (29) (30) (31) (32) |           | (39) |
| MCM1xSTE12 | (27) (26)      | (34)      | (29) (30) (31)      |           |      |
| MCM1xSWI4  | (27) (26)      | (34)      | (29) (30) (31) (32) |           |      |
| MCM1xSWI6  | (27) (26)      | (34) (35) | (29) (30) (31) (32) |           |      |
| MET32xMET4 | (27)           | (35)      | (29) (30) (31)      |           |      |
| MET32xTYE7 | (27)           | (34) (35) | (29) (30) (31)      | (30)      |      |
| MIG1xMIG3  | (27)           | (34) (35) | (29) (30) (31)      | (30)      |      |
| MIG1xPHD1  | (27) (26)      | (34) (35) | (30) (31)           |           |      |
| MIG1xRGT1  | (27) (26)      | (35)      | (31)                | (30)      | (51) |
| MIG1xSKN7  | (27) (26)      | (35)      | (30) (31)           |           |      |
| MIG1xSOK2  | (27) (26)      | (35)      | (31) (32)           |           |      |
| MIG1xSUT1  | (27)           | (34) (35) | (29) (30) (31) (32) | (30)      |      |
| MIG2xMOT3  | (27)           | (35)      | (31)                |           |      |
| MIG2xOAF1  | (27)           | (35)      | (30) (31)           |           |      |
| MIG3xMSN4  | (27)           | (34) (35) | (29) (30) (31)      | (30) (29) |      |
| MIG3xNRG1  | (27)           | (34) (35) | (30) (31)           | (30)      |      |
| MIG3xPHD1  | (27)           | (35)      | (29) (31)           |           |      |
| MIG3xRGT1  | (27)           | (35)      | (29) (30) (31)      |           |      |

|              |                |           |                     |           |      |
|--------------|----------------|-----------|---------------------|-----------|------|
| MIG3xSTP1    | (27)           | (34) (35) | (29) (30) (31)      | (29)      |      |
| MIG3xSUT1    | (27)           | (34) (35) | (29) (30) (31)      | (30)      |      |
| MIG3xYPR196W | (27)           | (35)      | (29) (30) (31)      |           |      |
| MOT3xSKN7    | (27)           | (34)      | (29) (32)           |           |      |
| MSN2xPHD1    | (26)           | (34)      | (29) (30) (31)      |           |      |
| MSN2xSKN7    | (27) (28)      | (35)      | (30) (31)           |           |      |
| MSN2xZMS1    | (28)           | (35)      | (29) (30) (31) (32) | (30) (29) |      |
| MSN4xSKN7    | (27)           | (35)      | (30) (31) (32)      |           |      |
| MSN4xXBP1    | (27)           | (35)      | (29) (30) (31) (32) |           |      |
| NDD1xSTB1    | (27) (26)      | (34)      | (29)                |           |      |
| NDD1xSWI6    | (27) (26)      | (34)      | (29) (31)           |           |      |
| NHP6AxPHO2   | (28)           | (34) (35) | (29)                |           |      |
| NRG1xPDR1    | (27) (26)      | (35)      | (30)                |           |      |
| NRG1xRIM101  | (27) (26)      | (35)      | (30) (31) (32)      | (29)      |      |
| OAF1xPDR3    | (27)           | (35)      | (30) (31) (32)      |           | (52) |
| PDR1xZMS1    | (27) (26)      | (34)      | (29) (30) (31)      |           |      |
| PDR3xSTP1    | (27)           | (34)      | (29) (30) (31)      |           |      |
| PHD1xSUT1    | (27)           | (34) (35) | (31) (32)           | (30)      |      |
| RAP1xSFP1    | (27) (26) (28) | (34) (35) | (29) (30) (31) (32) |           |      |
| RAP1xSTP1    | (28)           | (35)      | (32)                |           |      |
| RCS1xSFP1    | (27) (26)      | (34) (35) | (29) (32)           |           |      |
| RDS1xSTP1    | (27)           | (35)      | (30) (31)           |           |      |
| RGM1xRPH1    | (27) (26)      | (35)      | (29) (30) (31) (32) | (30)      |      |
| RGT1xSUT1    | (27)           | (35)      | (30) (31) (32)      | (29)      |      |
| RPH1xZMS1    | (28)           | (34) (35) | (29) (30) (31) (32) | (30)      |      |
| RTG3xSTB5    | (27)           | (34)      | (29) (32)           | (30) (29) |      |
| SKN7xUGA3    | (28)           | (35)      | (29) (31)           |           |      |
| SKN7xZMS1    | (28)           | (35)      | (31)                |           |      |
| SNF1xYBL054W | (27)           | (35)      | (32)                |           |      |
| STB1xSWI4    | (27) (26)      | (34)      | (29) (30) (32)      | (29)      | (41) |
| STB1xSWI6    | (27) (26)      | (34) (35) | (29) (30) (31)      | (30) (29) | (41) |
| STP1xSTP2    | (27) (26)      | (35)      | (30) (31) (32)      |           |      |
| STP1xTHI2    | (27) (26)      | (34) (35) | (29) (32)           |           |      |
| STP1xZMS1    | (28)           | (35)      | (29) (30) (31) (32) |           |      |
| SWI4xSWI6    | (27) (26)      | (34) (35) | (29) (30) (31) (32) | (30) (29) | (39) |
| UME6xZMS1    | (28)           | (34)      | (31)                |           |      |
| ABF1xACA1    |                | (34)      | (32)                |           |      |
| ABF1xBAS1    |                | (34)      | (29) (30) (31) (32) |           |      |
| ABF1xCST6    |                | (35)      | (32)                |           |      |
| ABF1xGCN4    |                | (34) (35) | (29) (30) (31)      |           |      |
| ABF1xHAP5    |                | (34) (35) | (30) (32)           |           |      |

|              |           |           |                     |           |      |
|--------------|-----------|-----------|---------------------|-----------|------|
| ABF1xHSF1    | (27) (26) |           | (30) (32)           |           |      |
| ABF1xINO2    | (27) (26) | (34)      |                     |           |      |
| ABF1xINO4    | (27) (26) | (34)      |                     |           |      |
| ABF1xPHD1    |           | (34)      | (29) (32)           |           |      |
| ABF1xRPN4    |           | (34) (35) | (29) (30) (31) (32) |           |      |
| ABF1xSTB3    |           | (34)      | (29) (30) (31)      | (30) (29) |      |
| ABF1xSWI4    |           | (34)      | (30) (31) (32)      |           |      |
| ABF1xTBF1    |           | (34) (35) | (29)                |           |      |
| ABF1xYPR196W |           | (34)      | (29)                |           |      |
| ACA1xGCN4    |           | (34)      | (29) (32)           | (30) (29) |      |
| ACA1xPHD1    |           | (34)      | (32)                |           |      |
| ACA1xRPN4    |           | (34) (35) | (30) (31) (32)      |           |      |
| ACA1xRTG3    |           | (34)      | (30) (32)           |           |      |
| ACA1xSKN7    |           | (35)      | (32)                | (30) (29) |      |
| ACA1xSTP1    |           | (34)      | (30) (31) (32)      |           |      |
| ACE2xSKN7    | (27) (26) |           | (32)                |           |      |
| ACE2xSWI5    | (27) (26) |           | (29) (32)           |           | (53) |
| AFT2xCBF1    |           | (35)      | (31) (32)           |           |      |
| AFT2xFHL1    |           | (34) (35) | (29)                | (30) (29) |      |
| AFT2xMIG1    | (27)      |           | (29) (31) (32)      |           |      |
| AFT2xRPH1    | (27)      |           | (32)                |           |      |
| AFT2xRPN4    | (27)      |           | (32)                |           |      |
| AFT2xTYE7    |           | (35)      | (31)                |           |      |
| AFT2xYJL103C |           | (35)      | (32)                |           |      |
| ARG80xMIG1   |           | (34)      | (31)                |           |      |
| ARG80xMIG3   | (27)      |           | (29) (30) (31)      |           |      |
| ARG81xMIG3   | (27)      |           | (31)                |           |      |
| ARG81xPHO4   |           | (34)      | (31)                |           |      |
| ARG81xRTG3   | (27) (26) |           | (29) (30)           |           |      |
| ARG81xSKN7   |           | (34)      | (31)                |           |      |
| ARG81xSTP1   | (27) (26) |           | (29) (30) (31)      |           |      |
| ARO80xCST6   | (27)      |           | (32)                |           |      |
| ARO80xPDR1   | (27) (26) |           | (29)                |           |      |
| ARO80xPDR3   | (27)      |           | (32)                |           |      |
| ARO80xSTP1   | (27) (26) |           | (30)                |           |      |
| ASH1xMBP1    | (27) (26) |           | (32)                |           |      |
| ASH1xNDD1    | (27) (26) |           | (29) (30)           |           |      |
| ASH1xSTP1    | (28)      |           | (32)                |           |      |
| ASH1xSWI6    | (27) (26) |           | (32)                |           |      |
| BAS1xSTP3    |           | (34) (35) | (29) (31)           |           |      |
| CAT8xGAL4    |           | (35)      | (32)                |           |      |

|                    |           |           |                |      |      |
|--------------------|-----------|-----------|----------------|------|------|
| CAT8xGIS1          |           | (35)      | (30) (31)      |      |      |
| CAT8xMIG1          |           | (35)      | (30) (31)      |      |      |
| CAT8xMIG3          |           | (34)      | (29) (30) (31) |      |      |
| CAT8xMSN2          |           | (35)      | (29) (30) (31) |      |      |
| CAT8xMSN4          |           | (35)      | (29) (30) (31) |      |      |
| CAT8xPDR1          |           | (35)      | (30) (31)      |      |      |
| CAT8xPHD1          |           | (35)      | (30) (31) (32) | (29) |      |
| CAT8xRDS1          |           | (35)      | (31)           |      |      |
| CAT8xRGM1          |           | (35)      | (30) (31)      |      |      |
| CAT8xRPH1          |           | (34) (35) | (30) (31)      |      |      |
| CAT8xRSC3          |           | (35)      | (30) (31)      | (30) |      |
| CAT8xRTG3          |           | (35)      | (31) (32)      |      |      |
| CAT8xSTP1          |           | (35)      | (29) (30) (31) |      |      |
| CAT8xSUT1          |           | (35)      | (30) (31)      |      |      |
| CAT8xSWI5          |           | (35)      | (29) (32)      | (30) |      |
| CAT8xUME6          |           | (35)      | (30) (31) (32) |      |      |
| CAT8xYER184C       |           | (35)      | (30) (31)      |      |      |
| CAT8xYPL230W       |           | (35)      | (30) (31)      |      |      |
| CBF1xDAL81         | (27)      |           | (32)           |      |      |
| CBF1xGAT1          |           | (34) (35) | (31) (32)      |      |      |
| CBF1xHAC1          |           | (35)      | (31)           |      |      |
| CBF1xHAP5          | (27)      | (35)      |                |      |      |
| CBF1xMATALPH<br>A2 |           | (34) (35) | (31)           |      |      |
| CBF1xMET28         |           | (34)      | (32)           |      | (58) |
| CBF1xOAF1          |           | (35)      | (32)           |      |      |
| CBF1xPDR8          |           | (35)      | (32)           |      |      |
| CBF1xPHD1          |           | (34)      | (29) (30) (31) |      |      |
| CBF1xPHO4          |           | (34) (35) | (31) (32)      |      |      |
| CBF1xRAP1          |           | (35)      | (32)           |      |      |
| CBF1xRTG3          |           | (34) (35) | (29) (31) (32) |      |      |
| CBF1xSUT1          |           | (34) (35) | (31) (32)      |      |      |
| CBF1xTYE7          | (27)      | (34) (35) |                |      |      |
| CBF1xYER184C       |           | (34) (35) | (32)           |      |      |
| CHA4xRGM1          |           | (34) (35) | (32)           |      |      |
| CIN5xNRG1          | (27) (26) |           | (31)           |      |      |
| CIN5xPDR3          |           | (35)      | (30) (31)      |      |      |
| CIN5xRGT1          | (27) (26) |           | (31) (32)      |      |      |
| CIN5xXBP1          | (27)      |           | (30)           |      |      |
| CRZ1xYJL103C       |           | (35)      | (29) (30) (31) |      |      |
| CST6xSUT1          |           | (35)      | (29) (30) (31) |      |      |

|              |                |           |                     |           |      |
|--------------|----------------|-----------|---------------------|-----------|------|
| CST6xSWI6    |                | (34)      | (32)                |           |      |
| CST6xYER184C |                | (35)      | (31) (32)           | (29)      |      |
| CST6xYJL103C |                | (35)      | (31) (32)           |           |      |
| CUP9xSFP1    |                | (35)      | (29) (30) (32)      |           |      |
| CUP9xSTP1    | (27) (26)      |           | (31) (32)           |           |      |
| DAL80xGLN3   |                | (35)      | (30)                |           |      |
| DAL80xGZF3   | (27)           |           | (30) (32)           |           |      |
| DAL80xHAP1   |                | (35)      | (29)                |           |      |
| DAL82xRDS1   |                | (34)      | (29) (30)           |           |      |
| DAL82xSTP1   | (27)           |           | (29) (30) (31)      | (30) (29) |      |
| EDS1xPBF1    |                | (34)      | (29) (30)           | (30) (29) |      |
| EDS1xPBF2    |                | (34)      | (29) (30) (31)      |           |      |
| EDS1xSTB3    |                | (34)      | (30)                | (30)      |      |
| FHL1xMET31   | (27) (26)      | (35)      |                     |           |      |
| FHL1xMIG1    |                | (35)      | (29)                |           |      |
| FHL1xMIG3    |                | (35)      | (29)                |           |      |
| FHL1xPHO4    |                | (35)      | (29)                |           |      |
| FHL1xRCS1    |                | (35)      | (29)                | (29)      |      |
| FHL1xRSC3    |                | (35)      | (29)                |           |      |
| FKH1xSTB1    |                | (34)      | (29) (30) (31)      | (29)      |      |
| FKH1xSWI4    | (27) (26) (28) |           | (29) (30) (31) (32) | (29)      | (47) |
| FKH2xHCM1    |                | (34)      | (32)                |           |      |
| FKH2xSWI4    | (27) (26) (28) |           | (29) (30) (31) (32) | (29)      |      |
| GAL4xGAL80   | (27)           | (34) (35) |                     |           |      |
| GAL4xPDR1    | (27) (26)      | (35)      |                     |           |      |
| GAL80xMIG3   | (27)           | (34) (35) |                     |           |      |
| GAL80xSTP1   | (27)           |           | (32)                |           |      |
| GAL80xSUT1   |                | (34)      | (32)                |           |      |
| GAT1xGLN3    | (27)           | (35)      |                     | (29)      |      |
| GAT1xGZF3    | (27)           |           | (32)                |           |      |
| GAT1xSIP4    | (27)           |           | (32)                |           |      |
| GAT4xGCR1    |                | (34)      | (31)                |           |      |
| GAT4xLYS14   |                | (34)      | (29)                |           |      |
| GCN4xSTB3    |                | (34) (35) | (29) (30)           |           |      |
| GCN4xTYE7    |                | (34) (35) | (29) (30) (31) (32) |           |      |
| GCR1xSTP2    | (27) (26)      | (34)      |                     |           |      |
| GIS1xMIG1    |                | (34)      | (29) (30) (31)      | (30) (29) |      |
| GIS1xMIG3    |                | (34) (35) | (29) (30) (31)      | (29)      |      |
| GIS1xNHP10   |                | (34)      | (30) (31)           |           |      |
| GIS1xRPH1    |                | (35)      | (29) (30) (31)      | (30)      |      |
| GIS1xSUT1    |                | (34) (35) | (29) (30) (31)      | (29)      |      |

|                    |      |           |                |           |      |
|--------------------|------|-----------|----------------|-----------|------|
| GIS1xYER184C       |      | (34) (35) | (30) (31)      | (30)      |      |
| GIS1xYJL103C       |      | (35)      | (30) (31)      | (30)      |      |
| GSM1xMIG3          |      | (34)      | (30) (31)      |           |      |
| GSM1xSUT1          |      | (34)      | (30) (31)      |           |      |
| HAC1xPHO4          |      | (35)      | (31)           |           |      |
| HAC1xYLL054C       |      | (35)      | (31)           |           |      |
| HAP1xMIG1          |      | (34)      | (29) (31)      | (30)      |      |
| HAP1xPHO4          |      | (34) (35) | (31)           |           |      |
| HAP1xRDS1          |      | (35)      | (31)           |           |      |
| HAP1xSKN7          | (27) | (35)      |                |           |      |
| HAP1xSOK2          |      | (35)      | (31)           |           |      |
| HAP1xTOS8          | (27) | (35)      |                |           |      |
| HAP1xYER184C       |      | (34) (35) | (29)           |           |      |
| HAP1xYJL103C       |      | (34)      | (30)           |           |      |
| HAP2xSUT1          |      | (34) (35) | (30) (31)      |           |      |
| HAP3xMBP1          |      | (34) (35) | (30) (31)      |           |      |
| HAP3xMIG3          | (27) | (34) (35) |                |           |      |
| HAP3xPDR8          |      | (34) (35) | (32)           |           |      |
| HAP3xRDS1          | (27) | (35)      |                |           |      |
| HAP3xSKN7          |      | (35)      | (32)           |           |      |
| HAP3xSUT1          |      | (34) (35) | (29) (31)      |           |      |
| HAP3xZMS1          |      | (34) (35) | (29) (32)      |           |      |
| HAP4xRDS1          | (27) |           | (30) (31)      | (30)      |      |
| HAP4xSKN7          |      | (34) (35) | (32)           |           |      |
| HAP4xSUT1          |      | (34) (35) | (30) (31) (32) | (30) (29) |      |
| HAP5xNHP10         |      | (34) (35) | (30)           |           |      |
| HAP5xRDS1          |      | (34)      | (31)           | (29)      |      |
| HAP5xSKN7          |      | (34) (35) | (30) (31) (32) |           |      |
| HAP5xSUT1          |      | (34) (35) | (30) (31)      |           |      |
| HMRA2xMCM1         |      | (34) (35) | (29)           |           |      |
| HMS1xMIG3          | (27) |           | (29) (31)      |           |      |
| HMS1xNHP10         |      | (34)      | (31)           |           |      |
| HMS1xSOK2          | (26) |           | (32)           |           |      |
| HMS1xSUT1          | (27) |           | (30) (31)      | (30)      |      |
| IME1xPDR3          |      | (35)      | (31)           |           |      |
| IME1xRDS1          | (27) |           | (30)           |           |      |
| IME1xSUT1          |      | (35)      | (30) (31) (32) | (30)      |      |
| IME1xUME6          |      | (34)      | (30)           |           | (46) |
| IME1xYPR196W       |      | (35)      | (30) (31)      |           |      |
| INO2xMATALPH<br>A2 |      | (35)      | (30)           |           |      |

|                  |                |           |                     |           |      |
|------------------|----------------|-----------|---------------------|-----------|------|
| INO2xPDR3        |                | (34)      | (30)                |           |      |
| INO2xRAP1        | (27) (26) (28) | (35)      |                     |           |      |
| INO2xTYE7        |                | (34) (35) | (31)                |           |      |
| INO2xYAP7        |                | (34)      | (29) (30)           |           |      |
| INO4xTYE7        |                | (34) (35) | (29) (31)           |           |      |
| INO4xYAP7        |                | (34)      | (29) (30) (31)      |           |      |
| LEU3xSTP2        | (27)           |           | (32)                |           |      |
| LEU3xSUT1        | (27)           |           | (29) (31) (32)      |           |      |
| LEU3xSWI4        | (28)           |           | (29) (31) (32)      |           |      |
| LYS14xMIG1       |                | (35)      | (29) (30) (31)      |           |      |
| LYS14xPDR3       |                | (35)      | (30) (31)           |           |      |
| LYS14xSTB5       |                | (34)      | (29) (31)           |           |      |
| LYS14xSTE12      |                | (34)      | (31)                | (29)      |      |
| LYS14xYJL103C    |                | (34)      | (29)                |           |      |
| MATALPHA2xMCM1   |                | (34)      | (31)                |           | (54) |
| MATALPHA2xNH P6B |                | (34)      | (29)                |           |      |
| MATALPHA2xSTE12  |                | (34)      | (29)                | (29)      |      |
| MBP1xMCM1        | (27) (26)      |           | (29) (31)           | (30)      |      |
| MBP1xMET28       |                | (34)      | (29)                |           |      |
| MBP1xPHD1        | (27) (26)      |           | (31)                |           |      |
| MBP1xREB1        |                | (34)      | (30)                |           |      |
| MBP1xRTG3        | (27)           |           | (29)                |           |      |
| MBP1xSTB2        |                | (34) (35) | (29) (30) (31) (32) | (30) (29) |      |
| MBP1xUME6        | (27)           | (34)      |                     |           |      |
| MBP1xYDR026C     |                | (34)      | (29) (30) (31) (32) |           |      |
| MCM1xNDD1        | (27) (26)      |           | (29) (30) (31)      |           | (56) |
| MCM1xSTP1        | (27) (26)      |           | (32)                |           |      |
| MCM1xYOX1        | (27)           |           | (29) (30) (31) (32) |           | (55) |
| MET28xSTB1       |                | (34)      | (29) (30) (31) (32) | (29)      |      |
| MET28xSUM1       |                | (34)      | (30) (32)           |           |      |
| MET28xSWI4       |                | (34)      | (29) (31) (32)      |           |      |
| MET28xSWI6       |                | (34)      | (29) (30)           |           |      |
| MET31xMIG3       | (27)           |           | (30) (31)           |           |      |
| MET31xPDR1       | (27) (26)      |           | (29)                |           |      |
| MET31xRPN4       | (27)           | (34) (35) |                     | (30)      |      |
| MET32xPHO4       |                | (34) (35) | (29) (30)           |           |      |
| MET4xRDS1        |                | (35)      | (30)                |           |      |
| MET4xTYE7        |                | (34) (35) | (29) (30) (31)      |           |      |
| MIG1xMSN2        |                | (34) (35) | (29) (30) (31) (32) | (29)      |      |



|              |           |           |                     |           |  |
|--------------|-----------|-----------|---------------------|-----------|--|
| MIG1xMSN4    |           | (34) (35) | (29) (30) (31) (32) | (29)      |  |
| MIG1xNRG1    | (27) (26) |           | (29) (30) (31) (32) |           |  |
| MIG1xPDR1    |           | (34)      | (29) (30) (31)      |           |  |
| MIG1xPHO4    |           | (34) (35) | (29) (31) (32)      |           |  |
| MIG1xRCS1    | (26)      |           | (29) (31) (32)      |           |  |
| MIG1xRDS1    |           | (35)      | (30) (31) (32)      |           |  |
| MIG1xRGM1    |           | (34)      | (29) (30) (31) (32) | (30) (29) |  |
| MIG1xSFP1    |           | (34) (35) | (32)                |           |  |
| MIG1xSTP1    |           | (35)      | (29) (30) (31) (32) |           |  |
| MIG1xSTP2    |           | (35)      | (29) (30) (31)      |           |  |
| MIG1xUGA3    | (27) (26) |           | (31) (32)           |           |  |
| MIG1xYER184C |           | (34)      | (29) (30) (31) (32) |           |  |
| MIG1xYJL103C |           | (34) (35) | (30) (31)           |           |  |
| MIG1xYPL230W |           | (34)      | (29) (30) (31)      | (30) (29) |  |
| MIG1xZMS1    |           | (34)      | (29) (30) (31) (32) |           |  |
| MIG2xSOK2    | (27)      |           | (32)                |           |  |
| MIG3xMSN2    |           | (34) (35) | (29) (30) (31)      | (30) (29) |  |
| MIG3xPDR1    |           | (34) (35) | (29) (30) (31)      |           |  |
| MIG3xPDR8    |           | (34) (35) | (29) (30) (31)      |           |  |
| MIG3xRDS1    |           | (34)      | (30) (31)           |           |  |
| MIG3xRGM1    |           | (34) (35) | (29) (30) (31)      | (29)      |  |
| MIG3xSOK2    | (27)      | (35)      |                     |           |  |
| MIG3xSTB5    | (27)      |           | (29) (30) (31)      |           |  |
| MIG3xSTP2    | (27)      |           | (29) (30) (31)      |           |  |
| MIG3xYER184C |           | (34) (35) | (30) (31)           |           |  |
| MIG3xYJL103C |           | (34) (35) | (30) (31)           |           |  |
| MIG3xYPL230W |           | (34) (35) | (29) (30) (31)      | (29)      |  |
| MIG3xZMS1    |           | (34)      | (29) (30) (31)      | (30) (29) |  |
| MSN2xNDD1    | (27) (26) |           | (31)                |           |  |
| MSN2xPHO4    |           | (35)      | (31)                | (30)      |  |
| MSN2xRPH1    | (27) (28) |           | (29) (30) (31) (32) |           |  |
| MSN2xSUT1    |           | (34) (35) | (29) (30) (31) (32) | (30) (29) |  |
| MSN2xYJL103C |           | (35)      | (29) (30) (31) (32) |           |  |
| MSN4xNDD1    | (27) (26) |           | (31)                |           |  |
| MSN4xNRG1    | (27)      |           | (29) (30) (31)      |           |  |
| MSN4xPHD1    | (27) (26) |           | (29) (30) (31)      |           |  |
| MSN4xRGM1    | (27) (26) | (35)      |                     | (30) (29) |  |
| MSN4xRPH1    | (27)      |           | (29) (30) (31) (32) | (30)      |  |
| MSN4xSUT1    |           | (34) (35) | (29) (30) (31)      | (30)      |  |
| MSN4xUGA3    | (27)      |           | (29) (30) (31) (32) | (30) (29) |  |
| MSN4xYER184C |           | (34) (35) | (29) (30) (31)      |           |  |

|               |           |           |                |           |  |
|---------------|-----------|-----------|----------------|-----------|--|
| MSN4xYJL103C  |           | (34) (35) | (29) (30) (31) |           |  |
| MSN4xZMS1     |           | (35)      | (29) (30) (31) | (30) (29) |  |
| NDD1xRDR1     |           | (34)      | (30) (31)      |           |  |
| NDD1xSUT1     | (27)      |           | (31)           |           |  |
| NDD1xSWI4     | (27) (26) |           | (29) (31)      |           |  |
| NDD1xXBP1     | (27)      |           | (29)           |           |  |
| NHP10xNRG1    |           | (34)      | (29) (30) (31) |           |  |
| NHP10xPDR1    |           | (34)      | (29) (30) (31) |           |  |
| NHP10xPHD1    |           | (34)      | (30) (31)      |           |  |
| NHP10xRGM1    |           | (34)      | (30) (31)      |           |  |
| NHP10xSUT1    |           | (34)      | (29) (31)      | (30)      |  |
| NHP10xYER184C |           | (34) (35) | (29) (30) (31) | (29)      |  |
| NHP10xYJL103C |           | (34)      | (29) (30) (31) |           |  |
| NHP10xYPL230W |           | (34)      | (30) (31)      |           |  |
| NHP6AxSTB5    |           | (34)      | (29) (31)      | (30) (29) |  |
| NHP6BxSTB5    |           | (34)      | (31)           | (29)      |  |
| NRG1xPHD1     | (27) (26) |           | (29) (30) (31) |           |  |
| NRG1xSKN7     | (27) (26) |           | (32)           |           |  |
| NRG1xSUT1     | (27)      |           | (30) (31) (32) |           |  |
| NRG1xYDR026C  |           | (35)      | (29) (30)      |           |  |
| NRG1xYJL103C  |           | (35)      | (30)           |           |  |
| OAF1xPDR1     | (27)      |           | (31)           |           |  |
| OAF1xRDS1     |           | (35)      | (31)           |           |  |
| OAF1xUME6     |           | (34) (35) | (30) (31)      |           |  |
| OPI1xSUT1     | (27)      |           | (32)           |           |  |
| OPI1xSUT2     |           | (34)      | (32)           |           |  |
| PBF1xSTB3     |           | (34)      | (29) (30) (31) | (30) (29) |  |
| PBF2xSTB3     |           | (34) (35) | (29) (30) (31) | (30) (29) |  |
| PDR1xPDR3     |           | (34)      | (30) (31)      |           |  |
| PDR1xRGM1     | (27) (26) |           | (29) (30) (31) |           |  |
| PDR1xSTB1     | (27) (26) |           | (29)           |           |  |
| PDR1xSTP1     | (27) (26) |           | (30) (31)      |           |  |
| PDR1xSUT1     |           | (34)      | (29) (30) (31) |           |  |
| PDR1xYER184C  |           | (34) (35) | (30) (31)      |           |  |
| PDR1xYJL103C  |           | (35)      | (30) (32)      |           |  |
| PDR3xPDR8     |           | (34) (35) | (31)           |           |  |
| PDR3xRDR1     |           | (34)      | (32)           |           |  |
| PDR3xRDS1     | (27)      | (34)      |                |           |  |
| PDR3xRGT1     |           | (35)      | (31)           | (30)      |  |
| PDR3xSUT1     |           | (35)      | (30) (31)      |           |  |
| PDR3xUME6     |           | (34)      | (30) (32)      |           |  |

|              |                |           |                     |           |  |
|--------------|----------------|-----------|---------------------|-----------|--|
| PDR8xPHO4    |                | (35)      | (31)                |           |  |
| PDR8xRDS1    |                | (34)      | (30)                |           |  |
| PDR8xSTP1    |                | (35)      | (29) (30) (31) (32) |           |  |
| PDR8xTYE7    |                | (34)      | (30) (31)           | (30)      |  |
| PDR8xUME6    |                | (34)      | (32)                |           |  |
| PDR8xYER184C |                | (35)      | (29)                |           |  |
| PDR8xYPR196W |                | (34)      | (31)                | (30)      |  |
| PHD1xRGM1    | (26)           |           | (29) (30) (31)      |           |  |
| PHD1xSKN7    | (27) (26)      |           | (31) (32)           |           |  |
| PHD1xSOK2    | (27) (26)      |           | (31) (32)           |           |  |
| PHD1xTYE7    |                | (34)      | (30) (32)           |           |  |
| PHD1xZMS1    |                | (35)      | (29) (30) (31)      |           |  |
| PHO4xRAP1    |                | (34) (35) | (32)                |           |  |
| PHO4xSFP1    |                | (34) (35) | (32)                | (30)      |  |
| PHO4xSTP1    |                | (35)      | (31) (32)           |           |  |
| PHO4xSUT1    |                | (34) (35) | (29) (31) (32)      |           |  |
| PHO4xTYE7    |                | (34) (35) | (29) (31) (32)      |           |  |
| RAP1xRCS1    |                | (34) (35) | (29) (32)           |           |  |
| RAP1xRPH1    | (27) (26) (28) | (35)      |                     |           |  |
| RAP1xRSC3    |                | (35)      | (31)                |           |  |
| RAP1xYJL103C |                | (34) (35) | (29)                |           |  |
| RCS1xRPH1    | (27)           |           | (31) (32)           | (29)      |  |
| RCS1xSOK2    |                | (34)      | (30) (31) (32)      | (30)      |  |
| RCS1xSTP2    | (26)           |           | (29) (31) (32)      |           |  |
| RDR1xUGA3    |                | (35)      | (29) (31) (32)      |           |  |
| RDS1xREB1    | (27)           |           | (30)                |           |  |
| RDS1xRGT1    |                | (35)      | (30) (31)           |           |  |
| RDS1xRPN4    |                | (35)      | (29) (32)           |           |  |
| RDS1xSTB2    | (27)           |           | (31) (32)           |           |  |
| RDS1xSWI4    |                | (34)      | (29) (32)           | (29)      |  |
| RDS1xYER184C |                | (35)      | (32)                |           |  |
| RDS2xSKN7    |                | (35)      | (30) (31) (32)      |           |  |
| REB1xSKN7    | (28)           | (35)      |                     |           |  |
| REB1xSTB3    |                | (34)      | (29) (30) (31)      | (30) (29) |  |
| REB1xSTP1    | (28)           |           | (32)                |           |  |
| REB1xSWI4    | (28)           |           | (31) (32)           |           |  |
| REB1xSWI6    |                | (34)      | (31) (32)           | (29)      |  |
| REB1xUME6    | (28)           |           | (29) (31) (32)      |           |  |
| RGM1xSUT1    |                | (34) (35) | (29) (30) (31) (32) | (29)      |  |
| RGM1xYER184C |                | (34) (35) | (30) (31) (32)      | (30)      |  |
| RGM1xYJL103C |                | (35)      | (30) (31) (32)      | (30)      |  |

|              |                |           |                     |           |  |
|--------------|----------------|-----------|---------------------|-----------|--|
| RGM1xZMS1    | (27) (26)      |           | (30) (31)           | (30)      |  |
| RGT1xYJL103C |                | (35)      | (31)                | (29)      |  |
| RGT1xYPR196W |                | (35)      | (31)                |           |  |
| RPH1xSUT1    |                | (35)      | (29) (30) (31) (32) |           |  |
| RPH1xYER184C |                | (35)      | (30) (32)           |           |  |
| RPH1xYJL103C |                | (35)      | (30) (32)           |           |  |
| RPH1xYPL230W |                | (35)      | (29) (30) (31) (32) | (30)      |  |
| RPN4xSUT1    |                | (34) (35) | (30) (31) (32)      |           |  |
| RPN4xYDR026C |                | (34) (35) | (29) (30) (31) (32) |           |  |
| RPN4xZMS1    |                | (34) (35) | (30) (32)           |           |  |
| RSC3xSFP1    |                | (35)      | (29)                |           |  |
| RTG3xSKN7    | (27)           |           | (32)                |           |  |
| RTG3xSUM1    | (27) (26)      |           | (30) (32)           | (29)      |  |
| RTG3xSUT1    |                | (34) (35) | (29)                |           |  |
| RTG3xSWI6    |                | (34)      | (29) (32)           |           |  |
| RTG3xTYE7    | (27)           |           | (31) (32)           |           |  |
| SIG1xXBP1    |                | (34)      | (29)                |           |  |
| SIP4xSTP1    | (27) (26)      |           | (32)                |           |  |
| SKN7xSOK2    | (27) (26)      |           | (32)                | (30)      |  |
| SKN7xSTB1    | (26)           |           | (32)                |           |  |
| SKN7xSTP1    | (28)           |           | (29) (32)           |           |  |
| SKN7xSUT1    | (27)           |           | (29) (32)           | (30)      |  |
| SKN7xSWI4    | (27) (26) (28) |           | (31) (32)           | (29)      |  |
| SKN7xSWI5    | (27) (26) (28) |           | (29) (32)           |           |  |
| SKN7xSWI6    | (27) (26)      |           | (32)                |           |  |
| SKN7xUME6    | (27) (28)      |           | (30) (32)           |           |  |
| SKN7xYJL103C |                | (34) (35) | (29)                |           |  |
| SNT2xSTB5    |                | (34)      | (30) (31)           |           |  |
| SOK2xSUT1    | (27)           |           | (32)                |           |  |
| STB1xSTB2    |                | (34)      | (31) (32)           |           |  |
| STB1xXBP1    |                | (35)      | (29) (30) (32)      |           |  |
| STB2xSTB3    |                | (34)      | (29) (30) (31)      | (30) (29) |  |
| STB2xSWI4    |                | (34)      | (30) (31) (32)      | (30)      |  |
| STB2xSWI6    |                | (34) (35) | (29) (30) (31) (32) | (30) (29) |  |
| STB2xYER184C | (27)           |           | (32)                |           |  |
| STB2xYRR1    | (27)           |           | (32)                |           |  |
| STB3xSWI6    |                | (34)      | (30)                |           |  |
| STB3xYBL054W |                | (34)      | (29) (30) (31)      | (30) (29) |  |
| STB4xUGA3    |                | (35)      | (30) (31)           |           |  |
| STB4xYER184C | (27)           |           | (29) (32)           |           |  |
| STP1xSUM1    | (27) (26)      |           | (32)                | (30)      |  |

|                     |           |           |                     |           |  |
|---------------------|-----------|-----------|---------------------|-----------|--|
| STP1xSUT1           |           | (35)      | (29) (30) (31) (32) | (30) (29) |  |
| STP1xSWI4           | (28)      |           | (32)                |           |  |
| STP1xUGA3           | (27) (28) |           | (29) (30) (31) (32) |           |  |
| STP1xUME6           | (28)      |           | (30) (31) (32)      |           |  |
| STP1xYER184C        |           | (35)      | (29) (30) (31)      |           |  |
| STP1xYJL103C        |           | (35)      | (29) (30) (31)      |           |  |
| STP2xZMS1           |           | (34)      | (29) (30) (31) (32) |           |  |
| SUM1xSWI6           |           | (35)      | (32)                | (29)      |  |
| SUT1xSWI4           | (27)      |           | (29) (32)           | (29)      |  |
| SUT1xSWI6           | (27)      |           | (29) (32)           |           |  |
| SUT1xYER130C        |           | (35)      | (29) (30) (31)      | (30) (29) |  |
| SUT1xYER184C        |           | (34) (35) | (30) (31) (32)      |           |  |
| SUT1xYJL103C        |           | (34) (35) | (30) (31)           |           |  |
| SUT1xYPL230W        |           | (34) (35) | (29) (30) (31)      | (29)      |  |
| SUT1xYPR196W        |           | (35)      | (30) (31) (32)      |           |  |
| SUT1xZMS1           |           | (34) (35) | (29) (30) (31) (32) | (30)      |  |
| SWI4xUGA3           | (28)      |           | (29) (31) (32)      |           |  |
| SWI4xXBP1           | (28)      |           | (29) (30) (31)      |           |  |
| SWI6xYDR026C        |           | (34)      | (31)                |           |  |
| UGA3xYER184C        |           | (35)      | (31)                |           |  |
| UGA3xYJL103C        |           | (35)      | (31)                |           |  |
| UME6xYER184C        |           | (34)      | (30) (31)           |           |  |
| UME6xYPR196W        |           | (34) (35) | (30) (31)           | (30)      |  |
| USV1xZMS1           |           | (35)      | (29) (30) (31)      |           |  |
| YAP3xYAP7           |           | (34)      | (32)                |           |  |
| YER184CxYPL230<br>W |           | (34) (35) | (30) (31)           | (30)      |  |
| YJL103CxYPL230<br>W |           | (35)      | (30) (31)           | (30)      |  |
| YJL103CxYPR196<br>W |           | (35)      | (30) (31)           |           |  |
| YJL103CxZMS1        |           | (34) (35) | (30) (31)           |           |  |
| YPR196WxYRM1        |           | (34)      | (30)                | (29)      |  |
| ABF1xDIG1           |           | (34)      |                     |           |  |
| ABF1xHAC1           |           |           | (31)                |           |  |
| ABF1xHMS1           |           | (34)      |                     |           |  |
| ABF1xIME1           |           | (35)      |                     |           |  |
| ABF1xMATALPH<br>A2  |           | (34)      |                     |           |  |
| ABF1xMBP1           |           |           | (30) (31)           |           |  |
| ABF1xMIG1           |           |           | (32)                |           |  |
| ABF1xPDR1           |           | (34)      |                     |           |  |

|              |      |      |                     |      |  |
|--------------|------|------|---------------------|------|--|
| ABF1xPDR3    |      | (34) |                     |      |  |
| ABF1xRDS1    |      | (34) |                     |      |  |
| ABF1xREB1    |      |      | (32)                |      |  |
| ABF1xRGM1    |      |      | (32)                | (30) |  |
| ABF1xRTG3    |      |      | (32)                |      |  |
| ABF1xSKN7    |      |      | (32)                |      |  |
| ABF1xSTB1    |      |      | (30) (31)           |      |  |
| ABF1xSTP1    |      |      | (32)                |      |  |
| ABF1xSUM1    |      |      | (29) (30) (31) (32) |      |  |
| ABF1xSUT1    |      |      | (31)                |      |  |
| ABF1xSWI6    |      |      | (30) (32)           |      |  |
| ABF1xTYE7    | (27) |      |                     |      |  |
| ABF1xYDR026C |      |      | (29)                |      |  |
| ABF1xYER184C |      |      | (32)                |      |  |
| ABF1xZAP1    | (26) |      |                     |      |  |
| ABF2xXBP1    |      |      | (29)                |      |  |
| ACA1xAFT2    |      |      | (29)                |      |  |
| ACA1xCAT8    |      |      | (30) (31) (32)      |      |  |
| ACA1xGAL80   |      | (35) |                     |      |  |
| ACA1xGIS1    |      |      | (30)                |      |  |
| ACA1xMET31   |      |      | (29) (30)           |      |  |
| ACA1xMIG1    |      |      | (29)                |      |  |
| ACA1xMIG3    |      |      | (29) (30)           |      |  |
| ACA1xMSN2    |      |      | (30) (31)           |      |  |
| ACA1xMSN4    |      |      | (29) (30) (31)      |      |  |
| ACA1xNHP10   |      |      | (30) (31)           |      |  |
| ACA1xRDS1    |      |      | (29) (30) (31)      |      |  |
| ACA1xRGM1    |      |      | (30)                |      |  |
| ACA1xRPH1    |      | (35) |                     |      |  |
| ACA1xSTP3    |      |      | (31)                | (29) |  |
| ACA1xSUT1    |      |      | (29) (30) (31) (32) |      |  |
| ACA1xSWI6    |      |      | (30) (32)           |      |  |
| ACA1xUME6    |      |      | (32)                |      |  |
| ACA1xYPL230W |      |      | (30)                |      |  |
| ACA1xZMS1    |      |      | (29)                |      |  |
| ACE2xCBFI    |      |      | (32)                |      |  |
| ACE2xMET28   |      |      | (29)                |      |  |
| ACE2xRSC3    |      |      | (29)                |      |  |
| ACE2xRSC30   |      |      | (29)                |      |  |
| ACE2xTYE7    |      |      | (29) (32)           |      |  |
| AFT1xAFT2    |      | (34) |                     |      |  |

|               |           |           |                |      |  |
|---------------|-----------|-----------|----------------|------|--|
| AFT1xRCS1     |           | (34)      |                | (29) |  |
| AFT2xCAT8     |           |           | (31)           |      |  |
| AFT2xINO2     |           |           | (31) (32)      |      |  |
| AFT2xMIG3     |           |           | (29) (31)      |      |  |
| AFT2xPHD1     |           |           | (29) (31)      |      |  |
| AFT2xPHO4     |           |           | (29) (31) (32) | (30) |  |
| AFT2xRSC3     |           |           | (29)           |      |  |
| AFT2xSTB2     |           |           | (29) (32)      |      |  |
| AFT2xSTP1     |           |           | (31) (32)      |      |  |
| AFT2xSUT1     |           |           | (29) (31) (32) |      |  |
| AFT2xZMS1     |           |           | (31) (32)      |      |  |
| ARG80xSTB3    |           | (34)      |                |      |  |
| ARG80xSUT2    |           |           | (32)           |      |  |
| ARG80xZMS1    |           |           | (29) (31)      |      |  |
| ARG81xCAT8    |           |           | (31)           |      |  |
| ARG81xMIG1    |           |           | (31)           | (29) |  |
| ARG81xRDS1    |           |           | (30)           |      |  |
| ARG81xRPH1    | (27) (26) |           |                |      |  |
| ARG81xSTP2    | (27) (26) |           |                |      |  |
| ARG81xSTP3    |           |           | (31)           |      |  |
| ARG81xSUT1    |           |           | (29) (31)      |      |  |
| ARG81xYJL103C |           |           | (32)           |      |  |
| ARO80xIME1    |           |           | (29)           |      |  |
| ARO80xPHD1    |           |           | (32)           |      |  |
| ARO80xUME6    |           |           | (29)           |      |  |
| ARO80xYRM1    |           | (35)      |                |      |  |
| ASG1xGIS1     |           | (34) (35) |                |      |  |
| ASG1xPHD1     |           | (35)      |                |      |  |
| ASG1xRGM1     |           | (34) (35) |                |      |  |
| ASG1xSTB5     |           | (35)      |                |      |  |
| ASG1xSTP1     |           | (34) (35) |                |      |  |
| ASG1xSTP3     |           | (35)      |                |      |  |
| ASG1xYPL230W  |           | (35)      |                |      |  |
| ASH1xCBF1     |           |           | (32)           |      |  |
| ASH1xMCM1     |           |           | (32)           |      |  |
| ASH1xOPI1     |           |           | (32)           |      |  |
| ASH1xTYE7     |           |           | (32)           |      |  |
| ASH1xYPR196W  | (27)      |           |                |      |  |
| CAD1xCBF1     | (27)      |           |                |      |  |
| CAT8xDAL82    |           |           | (30)           |      |  |
| CAT8xHAC1     |           |           | (31)           |      |  |

|              |           |           |                     |      |      |
|--------------|-----------|-----------|---------------------|------|------|
| CAT8xNHP10   |           |           | (30) (31)           |      |      |
| CAT8xNRG1    |           |           | (30) (31)           |      |      |
| CAT8xPDR3    |           |           | (30) (31) (32)      |      |      |
| CAT8xRCS1    |           |           | (31)                |      |      |
| CAT8xRDS2    |           |           | (30) (32)           |      |      |
| CAT8xSKN7    |           |           | (30) (31) (32)      |      |      |
| CAT8xSTB4    |           |           | (31)                |      |      |
| CAT8xSTB5    |           |           | (30) (31) (32)      |      |      |
| CAT8xSTP2    |           |           | (30) (31)           |      |      |
| CAT8xUGA3    |           |           | (30) (31)           |      |      |
| CAT8xYDR026C |           |           | (31)                | (29) |      |
| CAT8xYJL103C |           | (35)      |                     |      |      |
| CAT8xYLL054C |           |           | (31)                |      |      |
| CAT8xYPR196W |           |           | (30) (31)           |      |      |
| CAT8xYRM1    |           |           | (30)                |      |      |
| CAT8xZMS1    |           |           | (30) (31)           |      |      |
| CBF1xCRZ1    |           |           | (30) (31) (32)      |      |      |
| CBF1xFHL1    |           |           | (29)                |      |      |
| CBF1xHAP1    |           | (34) (35) |                     |      |      |
| CBF1xHMS1    |           |           | (29) (31)           | (29) |      |
| CBF1xMBP1    |           |           | (29) (32)           |      |      |
| CBF1xMET31   | (27) (26) |           |                     |      | (58) |
| CBF1xPDR3    |           |           | (32)                |      |      |
| CBF1xRDS2    |           |           | (31)                |      |      |
| CBF1xREB1    |           |           | (32)                |      |      |
| CBF1xRPH1    |           |           | (29) (30) (31) (32) |      |      |
| CBF1xSFP1    |           |           | (29) (32)           |      |      |
| CBF1xSTB2    |           |           | (32)                |      |      |
| CBF1xSTB4    |           |           | (31)                |      |      |
| CBF1xSTP1    |           |           | (29) (31) (32)      |      |      |
| CBF1xYDR026C |           |           | (32)                |      |      |
| CBF1xYDR520C |           |           | (32)                |      |      |
| CBF1xYJL103C |           | (34) (35) |                     |      |      |
| CBF1xYOX1    |           |           | (32)                |      |      |
| CBF1xYRM1    |           |           | (30) (31)           |      |      |
| CEP3xMIG3    |           | (35)      |                     |      |      |
| CEP3xRDS1    |           | (34)      |                     |      |      |
| CEP3xSTB4    |           |           | (29)                |      |      |
| CEP3xYNR063W |           | (34) (35) |                     |      |      |
| CHA4xGIS1    |           | (34) (35) |                     |      |      |
| CHA4xYPL230W |           | (34) (35) |                     |      |      |



|               |      |      |                     |           |  |
|---------------|------|------|---------------------|-----------|--|
| CIN5xMET4     |      |      | (29)                |           |  |
| CIN5xNHP6A    | (28) |      |                     |           |  |
| CIN5xPDR8     |      |      | (30) (31)           |           |  |
| CIN5xSTB2     |      |      | (30)                |           |  |
| CIN5xYPR196W  |      |      | (31)                | (30)      |  |
| CRZ1xGIS1     |      |      | (29) (30) (31)      |           |  |
| CRZ1xINO2     |      |      | (30) (31) (32)      |           |  |
| CRZ1xMSN2     |      |      | (29) (30) (31) (32) | (30)      |  |
| CRZ1xPDR3     |      |      | (30) (32)           |           |  |
| CRZ1xRDS1     |      |      | (30)                |           |  |
| CRZ1xRGM1     |      |      | (29) (30) (31) (32) |           |  |
| CRZ1xSTP1     |      |      | (30) (31) (32)      |           |  |
| CRZ1xSUT1     |      |      | (29) (30) (31) (32) |           |  |
| CRZ1xTYE7     |      |      | (31)                |           |  |
| CRZ1xYPL230W  |      |      | (29) (30) (31)      |           |  |
| CST6xYLL054C  |      | (35) |                     |           |  |
| CUP9xRSC3     |      | (35) |                     |           |  |
| CUP9xRSC30    |      | (35) |                     |           |  |
| DAL80xGAT1    |      |      | (30) (32)           |           |  |
| DAL80xBP1     |      |      | (31) (32)           | (30) (29) |  |
| DAL82xHAP3    | (26) |      |                     |           |  |
| DAL82xIME1    |      |      | (29)                |           |  |
| DAL82xLYS14   |      |      | (31)                |           |  |
| DAL82xMBP1    |      |      | (29)                |           |  |
| DAL82xMCM1    |      |      | (29) (31)           |           |  |
| DAL82xPDR1    |      |      | (29) (30) (31)      |           |  |
| DAL82xPHD1    |      |      | (31)                | (29)      |  |
| DAL82xREB1    |      |      | (29)                |           |  |
| DAL82xRSC3    |      |      | (30)                |           |  |
| DAL82xSTB1    |      |      | (29) (32)           |           |  |
| DAL82xSUT1    |      |      | (30) (31)           |           |  |
| DAL82xSWI4    |      |      | (29)                |           |  |
| DAL82xTYE7    |      |      | (32)                |           |  |
| DAL82xYER184C |      |      | (31)                |           |  |
| ECM23xGAT4    |      | (34) |                     |           |  |
| ECM23xGCR1    |      | (34) |                     |           |  |
| ECM23xMET4    |      | (35) |                     |           |  |
| EDS1xGAL80    | (27) |      |                     |           |  |
| EDS1xMBP1     |      | (34) |                     | (29)      |  |
| EDS1xRGT1     |      |      | (29)                | (29)      |  |
| FHL1xINO4     | (28) |      |                     |           |  |

|               |           |           |                |           |      |
|---------------|-----------|-----------|----------------|-----------|------|
| FHL1xTYE7     |           |           | (29)           |           |      |
| FHL1xYJL103C  |           | (34) (35) |                |           |      |
| FKH1xHCM1     |           | (34)      |                | (30)      |      |
| FKH1xNDD1     | (27) (26) |           |                |           | (56) |
| FKH2xNDD1     | (27) (26) |           |                | (29)      | (56) |
| GAL4xMSN4     | (27) (26) |           |                |           |      |
| GAL4xRGM1     | (27) (26) |           |                |           |      |
| GAL80xGIS1    |           | (34)      |                |           |      |
| GAL80xIME1    |           | (35)      |                |           |      |
| GAL80xSKN7    |           | (34)      |                |           |      |
| GAL80xYER184C |           | (34)      |                |           |      |
| GAL80xYJL103C |           | (34)      |                |           |      |
| GAL80xYPL230W |           | (34)      |                |           |      |
| GAT3xMCM1     |           |           | (32)           |           |      |
| GAT3xRLM1     |           |           | (29)           |           |      |
| GAT4xMOT3     |           | (34)      |                |           |      |
| GCN4xRSC3     |           |           | (31)           |           |      |
| GCN4xTBF1     |           |           | (29)           |           |      |
| GCR1xLYS14    |           | (34)      |                |           |      |
| GCR1xSTB4     |           | (34)      |                |           |      |
| GCR2xSNF1     |           |           | (32)           |           |      |
| GCR2xSTB4     |           |           | (29)           |           |      |
| GCR2xYBL054W  |           | (34)      |                | (30) (29) |      |
| GIS1xMIG2     |           |           | (30) (31)      |           |      |
| GIS1xMSN4     |           | (35)      |                | (30) (29) |      |
| GIS1xNRG1     |           |           | (29) (30) (31) |           |      |
| GIS1xOAF1     |           |           | (30) (31)      | (30)      |      |
| GIS1xOPI1     |           |           | (29)           |           |      |
| GIS1xPDR1     |           |           | (29) (30) (31) |           |      |
| GIS1xPHD1     |           |           | (29) (30) (31) |           |      |
| GIS1xRDS1     |           |           | (30) (31)      |           |      |
| GIS1xRDS2     |           |           | (29) (30) (31) | (30)      |      |
| GIS1xRSC3     |           |           | (29) (30) (31) | (30)      |      |
| GIS1xSKN7     |           |           | (30) (31)      |           |      |
| GIS1xSOK2     |           |           | (31)           |           |      |
| GIS1xSTP1     |           |           | (29) (30) (31) | (30)      |      |
| GIS1xTBF1     |           |           | (30)           | (30)      |      |
| GIS1xUGA3     |           |           | (29) (30) (31) |           |      |
| GIS1xUME6     |           |           | (30) (31)      |           |      |
| GIS1xYDR026C  |           |           | (30) (31)      | (30)      |      |
| GIS1xZMS1     |           |           | (30) (31)      | (30)      |      |

|              |           |           |                |      |  |
|--------------|-----------|-----------|----------------|------|--|
| GSM1xMIG1    |           |           | (30) (31)      |      |  |
| GSM1xRDS1    |           | (35)      |                |      |  |
| GSM1xREB1    |           |           | (29)           |      |  |
| GTS1xMET32   |           |           | (32)           | (29) |  |
| HAC1xMIG1    |           |           | (29) (31)      |      |  |
| HAC1xPHD1    |           |           | (31)           |      |  |
| HAC1xSWI6    |           |           | (29)           |      |  |
| HAC1xTYE7    | (27)      |           |                |      |  |
| HAP1xMIG3    |           | (34) (35) |                |      |  |
| HAP1xREB1    |           |           | (29)           |      |  |
| HAP1xRSC3    |           |           | (31)           | (30) |  |
| HAP1xSFP1    |           |           | (29)           |      |  |
| HAP1xZMS1    |           |           | (29) (31)      |      |  |
| HAP2xRDS1    |           |           | (30)           |      |  |
| HAP2xYLL054C |           | (35)      |                |      |  |
| HAP3xRSC3    |           |           | (29) (30) (31) |      |  |
| HAP3xSWI6    |           | (35)      |                |      |  |
| HAP3xYAP3    |           |           | (32)           |      |  |
| HAP3xYBL054W |           | (35)      |                |      |  |
| HAP4xYLL054C |           |           | (30)           |      |  |
| HAP5xPHD1    |           |           | (32)           |      |  |
| HAP5xRSC3    |           |           | (29) (30) (31) |      |  |
| HAP5xSTP2    | (27) (26) |           |                |      |  |
| HAP5xYAP3    |           |           | (32)           |      |  |
| HAP5xYDR026C |           | (34) (35) |                |      |  |
| HCM1xMCM1    |           | (35)      |                | (30) |  |
| HMRA2xNHP6B  |           |           | (30) (31)      |      |  |
| HMS1xMIG1    |           |           | (29) (30) (31) | (30) |  |
| HMS1xRSC3    |           |           | (30)           |      |  |
| HMS1xYOX1    | (27)      |           |                |      |  |
| HMS1xZMS1    |           |           | (30) (31)      |      |  |
| HSF1xYRR1    | (27)      |           |                |      |  |
| IME1xMCM1    |           |           | (29) (30) (32) |      |  |
| IME1xNDD1    |           |           | (29) (31)      |      |  |
| IME1xPDR1    |           |           | (30)           |      |  |
| IME1xRPN4    |           |           | (30) (31) (32) |      |  |
| IME1xRSC3    |           |           | (29) (30) (31) |      |  |
| IME1xRSC30   |           |           | (29) (30) (31) |      |  |
| IME1xSTP1    |           |           | (30) (31)      |      |  |
| IME1xUGA3    |           |           | (29) (30) (31) |      |  |
| INO2xOAF1    |           |           | (32)           |      |  |

|               |                |           |                |      |  |
|---------------|----------------|-----------|----------------|------|--|
| INO2xRCS1     |                |           | (31) (32)      |      |  |
| INO2xRDS1     |                | (34)      |                |      |  |
| INO2xREB1     | (28)           |           |                |      |  |
| INO2xSTB2     |                |           | (32)           |      |  |
| INO2xSTB4     |                |           | (32)           |      |  |
| INO2xYDR026C  |                |           | (32)           |      |  |
| INO4xPHO4     |                | (35)      |                |      |  |
| INO4xRAP1     | (27) (26) (28) |           |                |      |  |
| INO4xREB1     | (28)           |           |                |      |  |
| INO4xXBP1     | (28)           |           |                |      |  |
| INO4xYLL054C  |                | (34)      |                |      |  |
| LEU3xMIG3     | (27)           |           |                |      |  |
| LEU3xSTB1     |                |           | (29)           |      |  |
| LEU3xSUT2     |                | (34) (35) |                |      |  |
| LEU3xYJL103C  |                | (35)      |                |      |  |
| LYS14xNHP10   |                |           | (30) (31)      | (29) |  |
| LYS14xNRG1    |                | (35)      |                |      |  |
| LYS14xPDR8    |                | (35)      |                |      |  |
| LYS14xSTB4    |                | (34)      |                |      |  |
| LYS14xSUT1    |                |           | (30) (31)      |      |  |
| LYS14xSUT2    |                | (35)      |                |      |  |
| LYS14xYLL054C |                |           | (31)           |      |  |
| LYS14xYRM1    |                |           | (31)           |      |  |
| MATA1xRLM1    | (26)           |           |                |      |  |
| MBP1xNDT80    |                |           | (30)           |      |  |
| MBP1xRDS1     |                |           | (32)           |      |  |
| MBP1xSTB3     |                |           | (30)           |      |  |
| MBP1xSTP1     |                |           | (31)           |      |  |
| MBP1xSTP2     |                |           | (31)           |      |  |
| MBP1xSUT1     |                |           | (29) (31) (32) |      |  |
| MBP1xTYE7     |                |           | (29)           |      |  |
| MCM1xMSN2     |                |           | (29) (30) (31) |      |  |
| MCM1xPHD1     |                |           | (31) (32)      |      |  |
| MCM1xRDS2     |                |           | (30) (32)      |      |  |
| MCM1xSTB1     |                |           | (29) (32)      |      |  |
| MCM1xSTP2     |                |           | (32)           |      |  |
| MCM1xUGA3     |                |           | (29) (31) (32) |      |  |
| MCM1xUME6     |                |           | (30) (32)      |      |  |
| MCM1xXBP1     |                |           | (29)           |      |  |
| MCM1xYPR196W  |                |           | (32)           |      |  |
| MET28xPHO4    |                |           | (31) (32)      |      |  |

|                   |      |      |                     |           |  |
|-------------------|------|------|---------------------|-----------|--|
| MET28xSTB5        |      | (34) |                     | (30) (29) |  |
| MET28xSUT1        |      |      | (29) (30) (32)      |           |  |
| MET28xYNR063<br>W |      | (35) |                     |           |  |
| MET31xMIG1        |      |      | (29) (30) (31)      |           |  |
| MET31xMSN4        |      |      | (29) (30) (31)      |           |  |
| MET31xPHO4        |      |      | (31) (32)           |           |  |
| MET31xRSC3        |      |      | (30)                |           |  |
| MET31xSKN7        |      |      | (31) (32)           |           |  |
| MET31xSTP3        |      |      | (31)                |           |  |
| MET31xTYE7        |      |      | (32)                | (30)      |  |
| MET4xSKN7         |      |      | (31)                |           |  |
| MET4xSTB2         |      |      | (31)                |           |  |
| MIG1xOAF1         |      |      | (30) (31) (32)      |           |  |
| MIG1xOPI1         |      |      | (32)                |           |  |
| MIG1xPDR3         |      |      | (31)                |           |  |
| MIG1xPDR8         |      |      | (30) (31) (32)      |           |  |
| MIG1xRPH1         |      |      | (29) (30) (31) (32) |           |  |
| MIG1xSIP4         |      | (35) |                     |           |  |
| MIG1xSTB2         |      |      | (32)                |           |  |
| MIG1xSTB5         |      |      | (30) (31)           |           |  |
| MIG1xSUT2         |      |      | (30) (31) (32)      |           |  |
| MIG1xUME6         |      |      | (30) (31) (32)      |           |  |
| MIG1xYDR026C      |      |      | (32)                |           |  |
| MIG1xYRM1         |      |      | (30) (31)           | (29)      |  |
| MIG2xRGM1         |      |      | (30) (31)           |           |  |
| MIG2xSTP2         |      |      | (32)                |           |  |
| MIG2xSUT1         |      |      | (30) (31) (32)      |           |  |
| MIG2xYPL230W      |      |      | (30) (31)           |           |  |
| MIG3xOAF1         |      |      | (30) (31)           | (29)      |  |
| MIG3xOPI1         | (27) |      |                     |           |  |
| MIG3xRPH1         |      |      | (29) (30) (31)      |           |  |
| MIG3xRPN4         |      | (35) |                     |           |  |
| MIG3xRSC3         |      |      | (31)                |           |  |
| MIG3xSKN7         |      |      | (29)                |           |  |
| MIG3xSTB2         |      |      | (29)                |           |  |
| MIG3xSTP3         |      |      | (30) (31)           |           |  |
| MIG3xSUT2         |      |      | (30) (31)           |           |  |
| MIG3xUGA3         |      |      | (29) (30) (31)      |           |  |
| MIG3xUME6         |      |      | (30) (31)           |           |  |
| MIG3xYDR520C      |      |      | (30)                |           |  |

|              |           |           |                     |           |  |
|--------------|-----------|-----------|---------------------|-----------|--|
| MIG3xYER130C |           |           | (30) (31)           |           |  |
| MIG3xYRM1    |           |           | (30) (31)           |           |  |
| MOT3xUSV1    |           | (35)      |                     |           |  |
| MSN2xMSN4    | (27) (26) |           |                     | (30) (29) |  |
| MSN2xREB1    | (28)      |           |                     |           |  |
| MSN2xRSC3    |           |           | (29) (30) (31)      | (30) (29) |  |
| MSN2xSOK2    |           |           | (31) (32)           | (30)      |  |
| MSN2xYDR026C |           |           | (29) (30) (31)      |           |  |
| MSN2xYER184C |           |           | (30) (31)           |           |  |
| MSN4xRDS1    |           |           | (30) (31)           |           |  |
| MSN4xRSC3    |           |           | (29) (30) (31)      | (30) (29) |  |
| MSN4xSTP1    |           |           | (29) (30) (31)      | (30)      |  |
| MSN4xYDR026C |           |           | (29) (30) (31) (32) |           |  |
| MSN4xYLL054C |           |           | (30)                |           |  |
| MSN4xYPL230W |           | (35)      |                     | (30) (29) |  |
| NDD1xRDS2    |           |           | (31)                |           |  |
| NDD1xYLL054C |           | (35)      |                     |           |  |
| NHP10xOAF1   |           |           | (30) (31)           |           |  |
| NHP10xRDS1   |           |           | (30)                |           |  |
| NHP10xRDS2   |           | (34)      |                     |           |  |
| NHP10xSKN7   |           |           | (29)                |           |  |
| NHP10xSTB5   |           |           | (29) (30) (31)      |           |  |
| NHP10xSTP1   |           |           | (30) (31)           |           |  |
| NHP10xSTP2   |           |           | (29) (30) (31)      |           |  |
| NHP10xYRM1   |           | (34)      |                     |           |  |
| NHP10xZMS1   |           |           | (30)                |           |  |
| NHP6AxNHP6B  |           | (34)      |                     |           |  |
| NHP6AxSPT15  |           | (34) (35) |                     |           |  |
| NHP6BxPHO2   |           | (34) (35) |                     |           |  |
| NHP6BxRLM1   |           |           | (29) (30) (31)      |           |  |
| NRG1xOPI1    |           |           | (32)                |           |  |
| NRG1xRDR1    |           |           | (32)                |           |  |
| NRG1xREB1    |           |           | (32)                |           |  |
| NRG1xRGM1    |           |           | (29) (30) (31)      |           |  |
| NRG1xRSC3    |           |           | (30) (31)           |           |  |
| NRG1xSTB2    |           |           | (29) (32)           |           |  |
| NRG1xTBF1    |           |           | (30)                |           |  |
| NRG1xYBL054W |           |           | (32)                |           |  |
| NRG1xYER184C |           |           | (29) (30) (31)      |           |  |
| NRG1xYPL230W |           |           | (29) (30) (31)      |           |  |
| NRG1xZMS1    |           |           | (29) (30) (31) (32) |           |  |

|              |  |      |                     |           |  |
|--------------|--|------|---------------------|-----------|--|
| OAF1xOPI1    |  |      | (32)                |           |  |
| OAF1xPDR8    |  |      | (30) (31) (32)      | (30) (29) |  |
| OAF1xRGT1    |  |      | (31)                |           |  |
| OAF1xSTB5    |  |      | (30)                |           |  |
| OAF1xSTP1    |  |      | (29) (30) (31) (32) |           |  |
| OAF1xSUT1    |  |      | (29) (30) (31) (32) | (30) (29) |  |
| OAF1xYPL230W |  |      | (30) (31)           | (30)      |  |
| OAF1xYPR196W |  |      | (31) (32)           |           |  |
| OAF1xZMS1    |  |      | (29) (30) (31) (32) | (30)      |  |
| OPI1xREB1    |  |      | (29)                |           |  |
| OPI1xRGM1    |  |      | (29)                |           |  |
| OPI1xRSC3    |  | (35) |                     |           |  |
| OPI1xRSC30   |  | (35) |                     |           |  |
| OPI1xSFP1    |  |      | (32)                |           |  |
| OPI1xSTB2    |  |      | (32)                |           |  |
| OPI1xYBL054W |  |      | (32)                |           |  |
| OPI1xYPL230W |  |      | (29)                |           |  |
| OPI1xYPR196W |  |      | (32)                |           |  |
| OPI1xZMS1    |  |      | (31) (32)           |           |  |
| PBF1xPBF2    |  | (34) |                     |           |  |
| PDR1xRDR1    |  |      | (30) (31)           |           |  |
| PDR1xRDS1    |  |      | (30)                |           |  |
| PDR1xREB1    |  |      | (31)                |           |  |
| PDR1xRGT1    |  |      | (31)                |           |  |
| PDR1xRSC3    |  |      | (29) (30) (31)      | (30) (29) |  |
| PDR1xRSC30   |  |      | (29) (30) (31)      |           |  |
| PDR1xSWI4    |  |      | (29)                |           |  |
| PDR1xUGA3    |  |      | (29) (31)           |           |  |
| PDR1xUME6    |  | (34) |                     |           |  |
| PDR1xYDR026C |  |      | (32)                |           |  |
| PDR1xYPL230W |  |      | (29) (30) (31)      |           |  |
| PDR1xYRM1    |  |      | (30) (31)           |           |  |
| PDR3xPHO4    |  |      | (32)                |           |  |
| PDR3xRSC3    |  |      | (31)                |           |  |
| PDR3xRTG3    |  |      | (32)                |           |  |
| PDR3xSKO1    |  |      | (32)                |           |  |
| PDR3xSUT2    |  |      | (30) (31)           |           |  |
| PDR3xYER184C |  |      | (31) (32)           |           |  |
| PDR3xYJL103C |  |      | (31)                |           |  |
| PDR3xYRM1    |  | (34) |                     |           |  |
| PDR8xRDR1    |  |      | (29)                |           |  |

|              |  |           |                     |      |  |
|--------------|--|-----------|---------------------|------|--|
| PDR8xREB1    |  |           | (29)                |      |  |
| PDR8xRGT1    |  |           | (30) (31) (32)      |      |  |
| PDR8xSTB5    |  |           | (30) (31) (32)      |      |  |
| PDR8xSUT1    |  |           | (30) (31)           | (30) |  |
| PDR8xSUT2    |  |           | (32)                |      |  |
| PDR8xYJL103C |  | (35)      |                     |      |  |
| PDR8xYRM1    |  |           | (30) (31)           |      |  |
| PHD1xPHO4    |  |           | (30) (31) (32)      |      |  |
| PHD1xRDS1    |  |           | (29) (30) (31)      |      |  |
| PHD1xREB1    |  |           | (31) (32)           |      |  |
| PHD1xRPH1    |  |           | (31)                |      |  |
| PHD1xRSC3    |  |           | (29)                |      |  |
| PHD1xSTB2    |  |           | (31)                |      |  |
| PHD1xSTP1    |  |           | (31) (32)           |      |  |
| PHD1xSTP2    |  |           | (29) (30) (31)      |      |  |
| PHD1xUGA3    |  |           | (31)                |      |  |
| PHD1xXBP1    |  |           | (31)                |      |  |
| PHD1xYER184C |  |           | (31)                |      |  |
| PHD1xYJL103C |  |           | (31)                | (30) |  |
| PHD1xYPL230W |  |           | (29) (30) (31)      |      |  |
| PHO2xSPT15   |  | (34) (35) |                     |      |  |
| PHO4xRSC3    |  |           | (30)                |      |  |
| PHO4xSKN7    |  |           | (31) (32)           |      |  |
| PHO4xSTB4    |  |           | (31)                | (30) |  |
| PHO4xSTP2    |  |           | (30) (31) (32)      |      |  |
| PHO4xYDR026C |  | (34)      |                     |      |  |
| RAP1xSTP2    |  | (35)      |                     |      |  |
| RAP1xTYE7    |  |           | (29) (32)           |      |  |
| RCS1xRSC3    |  |           | (29)                |      |  |
| RCS1xSUT1    |  |           | (29) (30) (31) (32) |      |  |
| RCS1xZMS1    |  |           | (30) (31) (32)      | (30) |  |
| RDR1xSTB1    |  |           | (32)                |      |  |
| RDR1xSTP1    |  |           | (32)                |      |  |
| RDR1xSUT1    |  |           | (30) (31) (32)      |      |  |
| RDS1xRDS2    |  |           | (30) (31)           | (29) |  |
| RDS1xRGM1    |  |           | (30) (31) (32)      |      |  |
| RDS1xRPH1    |  |           | (30)                |      |  |
| RDS1xRSC3    |  | (35)      |                     |      |  |
| RDS1xRSC30   |  | (35)      |                     |      |  |
| RDS1xSKN7    |  |           | (29)                |      |  |
| RDS1xSTB1    |  |           | (29)                |      |  |



|              |  |      |                     |      |  |
|--------------|--|------|---------------------|------|--|
| RDS1xSTB5    |  |      | (29) (30) (31)      |      |  |
| RDS1xSTP2    |  |      | (32)                |      |  |
| RDS1xSUT1    |  |      | (29) (30) (31) (32) |      |  |
| RDS1xUGA3    |  |      | (31)                |      |  |
| RDS1xUME6    |  | (34) |                     |      |  |
| RDS1xYDR026C |  |      | (30) (31)           |      |  |
| RDS1xYDR520C |  |      | (32)                |      |  |
| RDS1xYJL103C |  | (35) |                     |      |  |
| RDS1xYPL230W |  |      | (30) (31)           |      |  |
| RDS1xYRM1    |  |      | (29) (30)           |      |  |
| RDS1xZMS1    |  |      | (30) (31)           |      |  |
| RDS2xRGM1    |  |      | (29) (30) (31)      | (30) |  |
| RDS2xSTB4    |  |      | (30)                |      |  |
| RDS2xSTB5    |  |      | (32)                |      |  |
| RDS2xSTP1    |  |      | (31) (32)           | (29) |  |
| RDS2xSUT1    |  |      | (31)                |      |  |
| RDS2xTYE7    |  |      | (31) (32)           |      |  |
| RDS2xYJL103C |  |      | (30)                |      |  |
| RDS2xYPL230W |  |      | (29) (30) (31)      | (30) |  |
| RDS2xYPR196W |  |      | (30) (31)           |      |  |
| RDS2xZMS1    |  |      | (29) (30) (31)      |      |  |
| REB1xRGM1    |  |      | (32)                |      |  |
| REB1xSTB1    |  |      | (31)                | (30) |  |
| REB1xSTB2    |  | (34) |                     | (30) |  |
| REB1xSTB5    |  |      | (32)                |      |  |
| REB1xSTP2    |  |      | (31)                |      |  |
| REB1xSUM1    |  |      | (32)                | (29) |  |
| REB1xTBF1    |  |      | (29)                |      |  |
| REB1xYER184C |  |      | (32)                |      |  |
| REB1xYPR196W |  |      | (29)                |      |  |
| REB1xYRM1    |  |      | (29)                |      |  |
| RGM1xRSC3    |  |      | (29) (30) (31)      | (30) |  |
| RGM1xSKN7    |  |      | (30) (31)           |      |  |
| RGM1xSOK2    |  |      | (31) (32)           |      |  |
| RGM1xSTP1    |  |      | (29) (30) (31) (32) | (30) |  |
| RGM1xTBF1    |  |      | (30)                | (30) |  |
| RGM1xUGA3    |  |      | (29) (30) (31)      |      |  |
| RGM1xUME6    |  |      | (30) (31) (32)      |      |  |
| RGM1xYDR026C |  |      | (30) (31) (32)      | (30) |  |
| RGM1xYER130C |  |      | (32)                |      |  |
| RGT1xRSC3    |  |      | (30) (31)           |      |  |

|              |      |                |           |  |
|--------------|------|----------------|-----------|--|
| RGT1xSKN7    |      | (32)           |           |  |
| RGT1xSTB3    | (34) |                |           |  |
| RGT1xSTP1    |      | (32)           |           |  |
| RGT1xUGA3    |      | (31)           |           |  |
| RGT1xUME6    |      | (32)           |           |  |
| RGT1xYRM1    |      | (31)           | (30)      |  |
| RGT1xZMS1    |      | (31)           |           |  |
| RPH1xRSC3    |      | (31)           |           |  |
| RPH1xYER130C |      | (30) (31) (32) |           |  |
| RPN4xUME6    |      | (30) (31) (32) |           |  |
| RSC30xSUT1   | (35) |                |           |  |
| RSC30xUME6   |      | (29) (31)      | (30) (29) |  |
| RSC30xYRM1   |      | (29) (30) (31) |           |  |
| RSC30xZMS1   |      | (31)           |           |  |
| RSC3xRTG3    |      | (29)           |           |  |
| RSC3xSKN7    |      | (31)           |           |  |
| RSC3xSTB5    |      | (31)           |           |  |
| RSC3xSTP1    |      | (29)           | (29)      |  |
| RSC3xSTP2    |      | (29)           |           |  |
| RSC3xSUT1    |      | (30) (31)      |           |  |
| RSC3xSWI5    |      | (29)           |           |  |
| RSC3xSWI6    |      | (29) (31)      |           |  |
| RSC3xXBP1    |      | (31)           |           |  |
| RSC3xYLL054C |      | (31)           |           |  |
| RSC3xYPL230W |      | (29) (30) (31) | (30)      |  |
| RSC3xYPR196W |      | (31)           | (30) (29) |  |
| RSC3xYRM1    |      | (29) (30) (31) |           |  |
| RSC3xZMS1    |      | (29) (30) (31) |           |  |
| RTG3xSTB1    |      | (29) (30) (32) | (30) (29) |  |
| RTG3xSWI4    |      | (29) (30) (32) | (29)      |  |
| SFP1xTYE7    |      | (32)           |           |  |
| SIP4xSKN7    | (35) |                |           |  |
| SKN7xSTB4    |      | (29)           |           |  |
| SKN7xSTB5    |      | (32)           |           |  |
| SKN7xSUT2    |      | (30) (32)      |           |  |
| SKN7xYDR520C |      | (31)           |           |  |
| SKN7xYER184C |      | (29) (31)      |           |  |
| SKN7xYPL230W |      | (30) (31)      |           |  |
| SKO1xSUM1    |      | (30) (32)      |           |  |
| SNT2xSTP3    | (34) |                |           |  |
| SOK2xYPL230W |      | (31) (32)      |           |  |

|              |      |      |                     |      |  |
|--------------|------|------|---------------------|------|--|
| SOK2xZMS1    |      |      | (32)                |      |  |
| SPT15xUPC2   |      |      | (29) (30) (31)      |      |  |
| SPT23xSTB3   |      |      | (29)                |      |  |
| SRD1xYER130C |      |      | (30) (31)           |      |  |
| STB1xSTB3    |      |      | (30) (31)           | (29) |  |
| STB1xSTP1    |      |      | (32)                |      |  |
| STB1xSUT1    |      |      | (29) (32)           |      |  |
| STB1xUGA3    |      |      | (29) (32)           |      |  |
| STB1xYDR026C |      |      | (32)                |      |  |
| STB1xYER184C |      |      | (29)                |      |  |
| STB1xYRM1    |      |      | (29)                |      |  |
| STB2xSTP1    |      |      | (32)                |      |  |
| STB2xSTP2    |      |      | (31) (32)           |      |  |
| STB2xSUM1    | (27) |      |                     |      |  |
| STB2xSUT1    |      |      | (32)                |      |  |
| STB2xTYE7    | (27) |      |                     |      |  |
| STB2xUME6    |      |      | (29)                |      |  |
| STB2xYDR026C |      |      | (32)                |      |  |
| STB2xZMS1    |      |      | (32)                |      |  |
| STB3xSWI4    |      |      | (30) (31)           | (29) |  |
| STB3xXBP1    |      |      | (30) (32)           |      |  |
| STB3xYDR026C |      |      | (29)                |      |  |
| STB3xYRR1    |      | (35) |                     |      |  |
| STB4xSTB5    | (27) |      |                     |      |  |
| STB4xSUT1    |      |      | (32)                |      |  |
| STB4xSUT2    |      |      | (32)                |      |  |
| STB4xYJL103C |      |      | (29) (32)           |      |  |
| STB5xSTP2    |      |      | (30) (31) (32)      |      |  |
| STB5xSUT1    |      |      | (31)                |      |  |
| STB5xSUT2    |      |      | (30)                |      |  |
| STB5xYDR520C |      |      | (30) (31) (32)      |      |  |
| STP1xSWI6    |      |      | (32)                |      |  |
| STP1xTYE7    |      |      | (31) (32)           |      |  |
| STP1xYLL054C |      |      | (29)                |      |  |
| STP1xYPL230W |      |      | (29) (30) (31)      | (30) |  |
| STP2xSUM1    |      |      | (32)                |      |  |
| STP2xSUT1    |      |      | (29) (30) (31) (32) |      |  |
| STP2xYER184C |      |      | (32)                |      |  |
| STP2xYJL103C |      |      | (30)                |      |  |
| STP3xSUT1    |      |      | (29) (31)           |      |  |
| SUT1xSUT2    |      |      | (30) (31) (32)      | (29) |  |

|                 |  |      |                |           |  |
|-----------------|--|------|----------------|-----------|--|
| SUT1xTYE7       |  |      | (29) (31) (32) |           |  |
| SUT1xUGA3       |  |      | (30) (31)      |           |  |
| SUT1xUME6       |  |      | (30) (31) (32) | (30)      |  |
| SUT1xYDR520C    |  |      | (32)           |           |  |
| SUT1xYRM1       |  |      | (30) (31)      |           |  |
| SUT2xXBP1       |  |      | (32)           |           |  |
| SUT2xYER184C    |  |      | (30) (32)      |           |  |
| SUT2xZMS1       |  |      | (30) (31) (32) |           |  |
| SWI4xYDR026C    |  |      | (32)           |           |  |
| SWI6xUGA3       |  |      | (29) (31)      |           |  |
| TBF1xTYE7       |  |      | (29)           |           |  |
| TBF1xYDR026C    |  |      | (29)           |           |  |
| TBF1xYPL230W    |  |      | (30)           | (30)      |  |
| TEC1xUPC2       |  |      | (31)           | (30) (29) |  |
| TEC1xYER130C    |  |      | (30) (32)      |           |  |
| TYE7xUME6       |  | (35) |                | (29)      |  |
| TYE7xYER184C    |  | (35) |                |           |  |
| TYE7xYJL103C    |  | (35) |                |           |  |
| UGA3xYPL230W    |  |      | (29) (30) (31) |           |  |
| UME6xYPL230W    |  |      | (30) (31)      |           |  |
| XBP1xYBL054W    |  |      | (31) (32)      |           |  |
| YDR026CxYER130C |  |      | (29)           |           |  |
| YDR026CxYER184C |  |      | (29) (32)      |           |  |
| YDR026CxYJL103C |  |      | (29) (32)      |           |  |
| YDR026CxYPL230W |  |      | (30) (31) (32) | (30)      |  |
| YER130CxZMS1    |  |      | (30) (31)      | (30) (29) |  |
| YER184CxYJL103C |  |      | (32)           |           |  |
| YER184CxZMS1    |  |      | (31)           |           |  |
| YPL230WxZMS1    |  |      | (30) (31) (32) | (30)      |  |
| YRM1xZMS1       |  |      | (30)           |           |  |
| ABF1xAFT2       |  |      |                |           |  |
| ABF1xCRZ1       |  |      |                |           |  |
| ABF1xGIS1       |  |      |                |           |  |
| ABF1xHAP3       |  |      |                |           |  |
| ABF1xMET28      |  |      |                |           |  |
| ABF1xMIG3       |  |      |                |           |  |
| ABF1xPHO4       |  |      |                |           |  |

|               |  |  |  |  |  |
|---------------|--|--|--|--|--|
| ABF1xRSC3     |  |  |  |  |  |
| ABF1xRSC30    |  |  |  |  |  |
| ABF1xSKO1     |  |  |  |  |  |
| ABF1xSTB2     |  |  |  |  |  |
| ABF1xSTP2     |  |  |  |  |  |
| ABF1xYJL103C  |  |  |  |  |  |
| ABF1xYLL054C  |  |  |  |  |  |
| ABF1xZMS1     |  |  |  |  |  |
| ACA1xOPI1     |  |  |  |  |  |
| ACA1xRSC3     |  |  |  |  |  |
| ACA1xYER184C  |  |  |  |  |  |
| ACA1xYJL103C  |  |  |  |  |  |
| ACA1xYLL054C  |  |  |  |  |  |
| ACE2xMET31    |  |  |  |  |  |
| AFT2xMET31    |  |  |  |  |  |
| ARG81xOPI1    |  |  |  |  |  |
| ARG81xRSC3    |  |  |  |  |  |
| ARG81xRSC30   |  |  |  |  |  |
| ARG81xSTB4    |  |  |  |  |  |
| ARG81xUME6    |  |  |  |  |  |
| ARO80xMIG1    |  |  |  |  |  |
| ARO80xRDR1    |  |  |  |  |  |
| ARO80xRDS1    |  |  |  |  |  |
| ARO80xRSC3    |  |  |  |  |  |
| ARO80xSTB4    |  |  |  |  |  |
| ARO80xSUT1    |  |  |  |  |  |
| ARO80xYER184C |  |  |  |  |  |
| ARR1xNHP6B    |  |  |  |  |  |
| ASH1xDAL82    |  |  |  |  |  |
| ASH1xNHP10    |  |  |  |  |  |
| ASH1xRSC3     |  |  |  |  |  |
| AZF1xECM23    |  |  |  |  |  |
| AZF1xEDS1     |  |  |  |  |  |
| CAD1xUSV1     |  |  |  |  |  |
| CAD1xYKL222C  |  |  |  |  |  |
| CAT8xLYS14    |  |  |  |  |  |
| CAT8xOPI1     |  |  |  |  |  |
| CAT8xREB1     |  |  |  |  |  |
| CAT8xSTB1     |  |  |  |  |  |
| CAT8xSTB2     |  |  |  |  |  |
| CAT8xYBL054W  |  |  |  |  |  |

|              |  |  |  |  |  |
|--------------|--|--|--|--|--|
| CAT8xYDR520C |  |  |  |  |  |
| CBF1xDAL82   |  |  |  |  |  |
| CBF1xRSC3    |  |  |  |  |  |
| CBF1xTBF1    |  |  |  |  |  |
| CBF1xYLL054C |  |  |  |  |  |
| CEP3xSTB3    |  |  |  |  |  |
| CIN5xHMRA2   |  |  |  |  |  |
| CIN5xREB1    |  |  |  |  |  |
| CIN5xYDR026C |  |  |  |  |  |
| CRZ1xPDR1    |  |  |  |  |  |
| CRZ1xSWI5    |  |  |  |  |  |
| CST6xNDD1    |  |  |  |  |  |
| CUP9xECM23   |  |  |  |  |  |
| CUP9xGAT3    |  |  |  |  |  |
| DAL82xEDS1   |  |  |  |  |  |
| DAL82xOPI1   |  |  |  |  |  |
| DAL82xSTB2   |  |  |  |  |  |
| DAL82xSTB3   |  |  |  |  |  |
| ECM23xMET32  |  |  |  |  |  |
| EDS1xRDR1    |  |  |  |  |  |
| EDS1xSTP1    |  |  |  |  |  |
| EDS1xYRM1    |  |  |  |  |  |
| FHL1xOPI1    |  |  |  |  |  |
| FHL1xSTP2    |  |  |  |  |  |
| GAL4xGIS1    |  |  |  |  |  |
| GAL4xRSC3    |  |  |  |  |  |
| GAL4xSUT1    |  |  |  |  |  |
| GAL4xYJL103C |  |  |  |  |  |
| GAL4xYPL230W |  |  |  |  |  |
| GAL80xPDR1   |  |  |  |  |  |
| GAL80xRSC3   |  |  |  |  |  |
| GAT3xRSC30   |  |  |  |  |  |
| GAT4xMET32   |  |  |  |  |  |
| GCR2xRDR1    |  |  |  |  |  |
| GCR2xRFX1    |  |  |  |  |  |
| GIS1xMSN2    |  |  |  |  |  |
| GIS1xREB1    |  |  |  |  |  |
| GIS1xYER130C |  |  |  |  |  |
| GIS1xYLL054C |  |  |  |  |  |
| GSM1xYJL103C |  |  |  |  |  |
| GTS1xMET4    |  |  |  |  |  |

|                     |  |  |  |  |  |
|---------------------|--|--|--|--|--|
| HAC1xMBP1           |  |  |  |  |  |
| HAC1xSUT1           |  |  |  |  |  |
| HAP1xNHP10          |  |  |  |  |  |
| HAP1xPDR3           |  |  |  |  |  |
| HAP1xUGA3           |  |  |  |  |  |
| HAP2xRSC3           |  |  |  |  |  |
| HAP4xRSC3           |  |  |  |  |  |
| HAP5xUGA3           |  |  |  |  |  |
| HAP5xYBL054W        |  |  |  |  |  |
| HCM1xNDD1           |  |  |  |  |  |
| HMRA2xMATALP<br>HA2 |  |  |  |  |  |
| HMRA2xNHP6A         |  |  |  |  |  |
| HMRA2xSPT15         |  |  |  |  |  |
| IME1xSKN7           |  |  |  |  |  |
| IME1xSTB2           |  |  |  |  |  |
| IME1xYLL054C        |  |  |  |  |  |
| INO2xPHD1           |  |  |  |  |  |
| INO2xPHO4           |  |  |  |  |  |
| INO2xYLL054C        |  |  |  |  |  |
| INO4xSTB2           |  |  |  |  |  |
| INO4xYDR026C        |  |  |  |  |  |
| LEU3xRSC3           |  |  |  |  |  |
| LEU3xTYE7           |  |  |  |  |  |
| LYS14xMCM1          |  |  |  |  |  |
| LYS14xSKN7          |  |  |  |  |  |
| MATALPHA2xNH<br>P6A |  |  |  |  |  |
| MATALPHA2xSP<br>T15 |  |  |  |  |  |
| MATALPHA2xTY<br>E7  |  |  |  |  |  |
| MBP1xRDS2           |  |  |  |  |  |
| MBP1xRSC3           |  |  |  |  |  |
| MBP1xSUM1           |  |  |  |  |  |
| MCM1xNHP10          |  |  |  |  |  |
| MCM1xPDR1           |  |  |  |  |  |
| MCM1xRSC3           |  |  |  |  |  |
| MCM1xSIP4           |  |  |  |  |  |
| MCM1xSUT1           |  |  |  |  |  |
| MCM1xYLL054C        |  |  |  |  |  |
| MET28xRSC3          |  |  |  |  |  |

|               |  |  |  |  |  |
|---------------|--|--|--|--|--|
| MET28xTYE7    |  |  |  |  |  |
| MET31xRDS1    |  |  |  |  |  |
| MET4xRSC3     |  |  |  |  |  |
| MIG1xNHP10    |  |  |  |  |  |
| MIG1xRDS2     |  |  |  |  |  |
| MIG1xREB1     |  |  |  |  |  |
| MIG1xRSC3     |  |  |  |  |  |
| MIG1xRSC30    |  |  |  |  |  |
| MIG1xYBL054W  |  |  |  |  |  |
| MIG1xYLL054C  |  |  |  |  |  |
| MIG2xSUT2     |  |  |  |  |  |
| MIG2xYAP7     |  |  |  |  |  |
| MIG2xYJL103C  |  |  |  |  |  |
| MIG3xRDS2     |  |  |  |  |  |
| MIG3xREB1     |  |  |  |  |  |
| MIG3xYDR026C  |  |  |  |  |  |
| MIG3xYLL054C  |  |  |  |  |  |
| MSN2xRGM1     |  |  |  |  |  |
| MSN2xYPL230W  |  |  |  |  |  |
| MSN4xREB1     |  |  |  |  |  |
| NDD1xRSC3     |  |  |  |  |  |
| NDD1xRSC30    |  |  |  |  |  |
| NDD1xSTP1     |  |  |  |  |  |
| NDD1xSTP2     |  |  |  |  |  |
| NDT80xSKN7    |  |  |  |  |  |
| NHP10xPDR8    |  |  |  |  |  |
| NHP10xRSC3    |  |  |  |  |  |
| NHP10xRSC30   |  |  |  |  |  |
| NHP10xYBL054W |  |  |  |  |  |
| NHP10xYPR196W |  |  |  |  |  |
| NHP6AxRLM1    |  |  |  |  |  |
| NRG1xRDS1     |  |  |  |  |  |
| OAF1xTYE7     |  |  |  |  |  |
| OAF1xYJL103C  |  |  |  |  |  |
| OPI1xRDS2     |  |  |  |  |  |
| OPI1xSTP3     |  |  |  |  |  |
| OPI1xYDR026C  |  |  |  |  |  |
| OPI1xYER184C  |  |  |  |  |  |
| OPI1xYJL103C  |  |  |  |  |  |
| PBF2xRTG1     |  |  |  |  |  |
| PBF2xXBP1     |  |  |  |  |  |



|              |  |  |  |  |  |
|--------------|--|--|--|--|--|
| PBF2xYBL054W |  |  |  |  |  |
| PDR1xRDS2    |  |  |  |  |  |
| PDR1xRTG3    |  |  |  |  |  |
| PDR1xSKN7    |  |  |  |  |  |
| PDR1xSTB2    |  |  |  |  |  |
| PDR1xSTB4    |  |  |  |  |  |
| PDR1xYLL054C |  |  |  |  |  |
| PDR3xSKN7    |  |  |  |  |  |
| PDR3xSTB5    |  |  |  |  |  |
| PDR3xTYE7    |  |  |  |  |  |
| PDR8xRSC3    |  |  |  |  |  |
| PDR8xRSC30   |  |  |  |  |  |
| PDR8xSTB1    |  |  |  |  |  |
| PHD1xRSC30   |  |  |  |  |  |
| PHD1xYDR026C |  |  |  |  |  |
| PHO4xRDS1    |  |  |  |  |  |
| PHO4xREB1    |  |  |  |  |  |
| PHO4xSTB2    |  |  |  |  |  |
| PHO4xTBF1    |  |  |  |  |  |
| PHO4xYLL054C |  |  |  |  |  |
| PHO4xYRM1    |  |  |  |  |  |
| RAP1xYLL054C |  |  |  |  |  |
| RDR1xRGT1    |  |  |  |  |  |
| RDR1xRSC3    |  |  |  |  |  |
| RDR1xRSC30   |  |  |  |  |  |
| RDR1xSKN7    |  |  |  |  |  |
| RDR1xYRM1    |  |  |  |  |  |
| RDS1xSWI6    |  |  |  |  |  |
| RDS1xXBP1    |  |  |  |  |  |
| RDS1xYLL054C |  |  |  |  |  |
| RDS2xSNT2    |  |  |  |  |  |
| RDS2xSTB3    |  |  |  |  |  |
| RDS2xYDR026C |  |  |  |  |  |
| REB1xRSC3    |  |  |  |  |  |
| REB1xRSC30   |  |  |  |  |  |
| REB1xSNT2    |  |  |  |  |  |
| REB1xSUT1    |  |  |  |  |  |
| REB1xTYE7    |  |  |  |  |  |
| REB1xYDR026C |  |  |  |  |  |
| REB1xYJL103C |  |  |  |  |  |
| REB1xYPL230W |  |  |  |  |  |

|               |  |  |  |  |      |
|---------------|--|--|--|--|------|
| REB1xYRR1     |  |  |  |  |      |
| REB1xZMS1     |  |  |  |  |      |
| RFX1xRSC3     |  |  |  |  |      |
| RGM1xYLL054C  |  |  |  |  |      |
| RGT1xSTB1     |  |  |  |  |      |
| RGT1xSUT2     |  |  |  |  |      |
| RLM1xSPT15    |  |  |  |  |      |
| RPH1xSTP3     |  |  |  |  |      |
| RSC30xRSC3    |  |  |  |  | (59) |
| RSC30xSKN7    |  |  |  |  |      |
| RSC30xSTB2    |  |  |  |  |      |
| RSC30xSTP1    |  |  |  |  |      |
| RSC30xSTP2    |  |  |  |  |      |
| RSC30xUGA3    |  |  |  |  |      |
| RSC30xYER051W |  |  |  |  |      |
| RSC30xYER184C |  |  |  |  |      |
| RSC30xYJL103C |  |  |  |  |      |
| RSC3xSTB1     |  |  |  |  |      |
| RSC3xSTB2     |  |  |  |  |      |
| RSC3xSUT2     |  |  |  |  |      |
| RSC3xSWI4     |  |  |  |  |      |
| RSC3xTHI2     |  |  |  |  |      |
| RSC3xUGA3     |  |  |  |  |      |
| RSC3xUME6     |  |  |  |  |      |
| RSC3xYBL054W  |  |  |  |  |      |
| RSC3xYDR026C  |  |  |  |  |      |
| RSC3xYER051W  |  |  |  |  |      |
| RSC3xYER184C  |  |  |  |  |      |
| RSC3xYJL103C  |  |  |  |  |      |
| SKN7xYBL054W  |  |  |  |  |      |
| SKN7xYDR026C  |  |  |  |  |      |
| SKN7xYLL054C  |  |  |  |  |      |
| SKN7xYRM1     |  |  |  |  |      |
| SNT2xSTB2     |  |  |  |  |      |
| SNT2xYER184C  |  |  |  |  |      |
| STB1xYLL054C  |  |  |  |  |      |
| STB2xTBF1     |  |  |  |  |      |
| STB2xYJL103C  |  |  |  |  |      |
| STB5xYER184C  |  |  |  |  |      |
| STB5xYJL103C  |  |  |  |  |      |
| STP1xSTP3     |  |  |  |  |      |

|                 |  |  |  |  |  |
|-----------------|--|--|--|--|--|
| STP1xYDR026C    |  |  |  |  |  |
| STP2xYLL054C    |  |  |  |  |  |
| SUT1xYDR026C    |  |  |  |  |  |
| SUT1xYLL054C    |  |  |  |  |  |
| SUT2xYJL103C    |  |  |  |  |  |
| SWI4xYLL054C    |  |  |  |  |  |
| SWI5xYLL054C    |  |  |  |  |  |
| TBF1xYRR1       |  |  |  |  |  |
| TYE7xUGA3       |  |  |  |  |  |
| TYE7xYDR026C    |  |  |  |  |  |
| TYE7xYDR520C    |  |  |  |  |  |
| TYE7xYLL054C    |  |  |  |  |  |
| TYE7xYRM1       |  |  |  |  |  |
| TYE7xYRR1       |  |  |  |  |  |
| UGA3xYLL054C    |  |  |  |  |  |
| UME6xYDR026C    |  |  |  |  |  |
| UME6xYLL054C    |  |  |  |  |  |
| YBL054WxYLL054C |  |  |  |  |  |
| YDR026CxYLL054C |  |  |  |  |  |
| YDR026CxZMS1    |  |  |  |  |  |
| YDR520CxZMS1    |  |  |  |  |  |
| YER130CxYPL230W |  |  |  |  |  |
| YER184CxYLL054C |  |  |  |  |  |
| YER184CxYRM1    |  |  |  |  |  |
| YJL103CxYLL054C |  |  |  |  |  |
| YJL103CxYRM1    |  |  |  |  |  |
| YKL222CxYRM1    |  |  |  |  |  |
| YLL054CxYPL230W |  |  |  |  |  |
| YLL054CxZMS1    |  |  |  |  |  |

## References

1. Gertz, J., Siggia, E.D. and Cohen, B.A. (2009) Analysis of combinatorial cis-regulation in synthetic and genomic promoters. *Nature*, **457**, 215-218.

2. Pilpel, Y., Sudarsanam, P. and Church, G.M. (2001) Identifying regulatory networks by combinatorial analysis of promoter elements. *Nat Genet*, **29**, 153-159.
3. Parker, D.S., White, M.A., Ramos, A.I., Cohen, B.A. and Barolo, S. (2011) The cis-regulatory logic of Hedgehog gradient responses: key roles for gli binding affinity, competition, and cooperativity. *Science signaling*, **4**, ra38.
4. Yuh, C.H., Bolouri, H. and Davidson, E.H. (1998) Genomic cis-regulatory logic: experimental and computational analysis of a sea urchin gene. *Science*, **279**, 1896-1902.
5. Gertz, J. and Cohen, B.A. (2009) Environment-specific combinatorial cis-regulation in synthetic promoters. *Molecular systems biology*, **5**, 244.
6. Pettersson, M. and Schaffner, W. (1990) Synergistic activation of transcription by multiple binding sites for NF-kappa B even in absence of co-operative factor binding to DNA. *Journal of molecular biology*, **214**, 373-380.
7. Aguilar, D. and Oliva, B. (2008) Topological comparison of methods for predicting transcriptional cooperativity in yeast. *BMC genomics*, **9**, 137.
8. Drazinic, C.M., Smerage, J.B., Lopez, M.C. and Baker, H.V. (1996) Activation mechanism of the multifunctional transcription factor repressor-activator protein 1 (Rap1p). *Mol Cell Biol*, **16**, 3187-3196.
9. Magbanua, J.P., Ogawa, N., Harashima, S. and Oshima, Y. (1997) The transcriptional activators of the PHO regulon, Pho4p and Pho2p, interact directly with each other and with components of the basal transcription machinery in *Saccharomyces cerevisiae*. *Journal of biochemistry*, **121**, 1182-1189.
10. Yu, X., Lin, J., Masuda, T., Esumi, N., Zack, D.J. and Qian, J. (2006) Genome-wide prediction and characterization of interactions between transcription factors in *Saccharomyces cerevisiae*. *Nucleic Acids Res*, **34**, 917-927.
11. Tirosh, I., Berman, J. and Barkai, N. (2007) The pattern and evolution of yeast promoter bendability. *Trends in genetics : TIG*, **23**, 318-321.
12. Shea, M.A. and Ackers, G.K. (1985) The OR control system of bacteriophage lambda. A physical-chemical model for gene regulation. *Journal of molecular biology*, **181**, 211-230.
13. Banerjee, N. and Zhang, M.Q. (2003) Identifying cooperativity among transcription factors controlling the cell cycle in yeast. *Nucleic Acids Res*, **31**, 7024-7031.
14. Beer, M.A. and Tavazoie, S. (2004) Predicting gene expression from sequence. *Cell*, **117**, 185-198.
15. GuhaThakurta, D. and Stormo, G.D. (2001) Identifying target sites for cooperatively binding factors. *Bioinformatics*, **17**, 608-621.

16. Wang, Y., Zhang, X.S. and Xia, Y. (2009) Predicting eukaryotic transcriptional cooperativity by Bayesian network integration of genome-wide data. *Nucleic Acids Res*, **37**, 5943-5958.
17. Kellis, M., Patterson, N., Endrizzi, M., Birren, B. and Lander, E.S. (2003) Sequencing and comparison of yeast species to identify genes and regulatory elements. *Nature*, **423**, 241-254.
18. Doniger, S.W. and Fay, J.C. (2007) Frequent gain and loss of functional transcription factor binding sites. *PLoS computational biology*, **3**, e99.
19. Moses, A.M., Pollard, D.A., Nix, D.A., Iyer, V.N., Li, X.Y., Biggin, M.D. and Eisen, M.B. (2006) Large-scale turnover of functional transcription factor binding sites in *Drosophila*. *PLoS computational biology*, **2**, e130.
20. Odom, D.T., Dowell, R.D., Jacobsen, E.S., Gordon, W., Danford, T.W., MacIsaac, K.D., Rolfe, P.A., Conboy, C.M., Gifford, D.K. and Fraenkel, E. (2007) Tissue-specific transcriptional regulation has diverged significantly between human and mouse. *Nat Genet*, **39**, 730-732.
21. Tuch, B.B., Galgoczy, D.J., Hernday, A.D., Li, H. and Johnson, A.D. (2008) The evolution of combinatorial gene regulation in fungi. *PLoS Biol*, **6**, e38.
22. Kim, J., He, X. and Sinha, S. (2009) Evolution of regulatory sequences in 12 *Drosophila* species. *PLoS genetics*, **5**, e1000330.
23. He, Q., Bardet, A.F., Patton, B., Purvis, J., Johnston, J., Paulson, A., Gogol, M., Stark, A. and Zeitlinger, J. (2011) High conservation of transcription factor binding and evidence for combinatorial regulation across six *Drosophila* species. *Nat Genet*, **43**, 414-420.
24. Spivak, A.T. and Stormo, G.D. (2012) ScerTF: a comprehensive database of benchmarked position weight matrices for *Saccharomyces* species. *Nucleic Acids Res*, **40**, D162-168.
25. Sarafova, S. and Siu, G. (2000) Precise arrangement of factor-binding sites is required for murine CD4 promoter function. *Nucleic Acids Res*, **28**, 2664-2671.
26. Harbison, C.T., Gordon, D.B., Lee, T.I., Rinaldi, N.J., Macisaac, K.D., Danford, T.W., Hannett, N.M., Tagne, J.B., Reynolds, D.B., Yoo, J. *et al.* (2004) Transcriptional regulatory code of a eukaryotic genome. *Nature*, **431**, 99-104.
27. Lee, T.I., Rinaldi, N.J., Robert, F., Odom, D.T., Bar-Joseph, Z., Gerber, G.K., Hannett, N.M., Harbison, C.T., Thompson, C.M., Simon, I. *et al.* (2002) Transcriptional regulatory networks in *Saccharomyces cerevisiae*. *Science*, **298**, 799-804.
28. Venters, B.J., Wachi, S., Mavrich, T.N., Andersen, B.E., Jena, P., Sinnamon, A.J., Jain, P., Rolleri, N.S., Jiang, C., Hemeryck-Walsh, C. *et al.* (2011) A comprehensive genomic binding map of gene and chromatin regulatory proteins in *Saccharomyces*. *Mol Cell*, **41**, 480-492.

29. Pramila, T., Wu, W., Miles, S., Noble, W.S. and Breeden, L.L. (2006) The Forkhead transcription factor Hcm1 regulates chromosome segregation genes and fills the S-phase gap in the transcriptional circuitry of the cell cycle. *Genes Dev*, **20**, 2266-2278.
30. Gasch, A.P., Spellman, P.T., Kao, C.M., Carmel-Harel, O., Eisen, M.B., Storz, G., Botstein, D. and Brown, P.O. (2000) Genomic expression programs in the response of yeast cells to environmental changes. *Mol Biol Cell*, **11**, 4241-4257.
31. Hughes, T.R., Marton, M.J., Jones, A.R., Roberts, C.J., Stoughton, R., Armour, C.D., Bennett, H.A., Coffey, E., Dai, H., He, Y.D. *et al.* (2000) Functional discovery via a compendium of expression profiles. *Cell*, **102**, 109-126.
32. Reimand, J., Vaquerizas, J.M., Todd, A.E., Vilo, J. and Luscombe, N.M. (2010) Comprehensive reanalysis of transcription factor knockout expression data in *Saccharomyces cerevisiae* reveals many new targets. *Nucleic Acids Res*, **38**, 4768-4777.
33. Hu, Z., Killion, P.J. and Iyer, V.R. (2007) Genetic reconstruction of a functional transcriptional regulatory network. *Nat Genet*, **39**, 683-687.
34. Ashburner, M., Ball, C.A., Blake, J.A., Botstein, D., Butler, H., Cherry, J.M., Davis, A.P., Dolinski, K., Dwight, S.S., Eppig, J.T. *et al.* (2000) Gene ontology: tool for the unification of biology. The Gene Ontology Consortium. *Nat Genet*, **25**, 25-29.
35. Kanehisa, M. and Goto, S. (2000) KEGG: kyoto encyclopedia of genes and genomes. *Nucleic Acids Res*, **28**, 27-30.
36. Liko, D., Slattery, M.G. and Heideman, W. (2007) Stb3 binds to ribosomal RNA processing element motifs that control transcriptional responses to growth in *Saccharomyces cerevisiae*. *The Journal of biological chemistry*, **282**, 26623-26628.
37. Zhu, C., Byers, K.J., McCord, R.P., Shi, Z., Berger, M.F., Newburger, D.E., Saulrieta, K., Smith, Z., Shah, M.V., Radhakrishnan, M. *et al.* (2009) High-resolution DNA-binding specificity analysis of yeast transcription factors. *Genome Res*, **19**, 556-566.
38. Tavazoie, S., Hughes, J.D., Campbell, M.J., Cho, R.J. and Church, G.M. (1999) Systematic determination of genetic network architecture. *Nat Genet*, **22**, 281-285.
39. Koch, C., Moll, T., Neuberg, M., Ahorn, H. and Nasmyth, K. (1993) A role for the transcription factors Mbp1 and Swi4 in progression from G1 to S phase. *Science*, **261**, 1551-1557.
40. de Bruin, R.A., Kalashnikova, T.I. and Wittenberg, C. (2008) Stb1 collaborates with other regulators to modulate the G1-specific transcriptional circuit. *Mol Cell Biol*, **28**, 6919-6928.
41. Ho, Y., Costanzo, M., Moore, L., Kobayashi, R. and Andrews, B.J. (1999) Regulation of transcription at the *Saccharomyces cerevisiae* start transition by Stb1, a Swi6-binding protein. *Mol Cell Biol*, **19**, 5267-5278.

42. Wade, J.T., Hall, D.B. and Struhl, K. (2004) The transcription factor Ifh1 is a key regulator of yeast ribosomal protein genes. *Nature*, **432**, 1054-1058.
43. Jorgensen, P., Rupes, I., Sharom, J.R., Schneper, L., Broach, J.R. and Tyers, M. (2004) A dynamic transcriptional network communicates growth potential to ribosome synthesis and critical cell size. *Genes Dev*, **18**, 2491-2505.
44. Olson, K.A., Nelson, C., Tai, G., Hung, W., Yong, C., Astell, C. and Sadowski, I. (2000) Two regulators of Ste12p inhibit pheromone-responsive transcription by separate mechanisms. *Mol Cell Biol*, **20**, 4199-4209.
45. Chou, S., Lane, S. and Liu, H. (2006) Regulation of mating and filamentation genes by two distinct Ste12 complexes in *Saccharomyces cerevisiae*. *Mol Cell Biol*, **26**, 4794-4805.
46. Rubin-Bejerano, I., Mandel, S., Robzyk, K. and Kassir, Y. (1996) Induction of meiosis in *Saccharomyces cerevisiae* depends on conversion of the transcriptional repressor Ume6 to a positive regulator by its regulated association with the transcriptional activator Ime1. *Mol Cell Biol*, **16**, 2518-2526.
47. Coic, E., Sun, K., Wu, C. and Haber, J.E. (2006) Cell cycle-dependent regulation of *Saccharomyces cerevisiae* donor preference during mating-type switching by SBF (Swi4/Swi6) and Fkh1. *Mol Cell Biol*, **26**, 5470-5480.
48. Ho, Y., Gruhler, A., Heilbut, A., Bader, G.D., Moore, L., Adams, S.L., Millar, A., Taylor, P., Bennett, K., Boutilier, K. *et al.* (2002) Systematic identification of protein complexes in *Saccharomyces cerevisiae* by mass spectrometry. *Nature*, **415**, 180-183.
49. Yoon, S., Govind, C.K., Qiu, H., Kim, S.J., Dong, J. and Hinnebusch, A.G. (2004) Recruitment of the ArgR/Mcm1p repressor is stimulated by the activator Gcn4p: a self-checking activation mechanism. *Proc Natl Acad Sci U S A*, **101**, 11713-11718.
50. Joo, Y.J., Kim, J.A., Baek, J.H., Seong, K.M., Han, K.D., Song, J.M., Choi, J.Y. and Kim, J. (2009) Cooperative regulation of ADE3 transcription by Gcn4p and Bas1p in *Saccharomyces cerevisiae*. *Eukaryotic cell*, **8**, 1268-1277.
51. Ozcan, S. and Johnston, M. (1996) Two different repressors collaborate to restrict expression of the yeast glucose transporter genes HXT2 and HXT4 to low levels of glucose. *Mol Cell Biol*, **16**, 5536-5545.
52. Shahi, P., Gulshan, K., Naar, A.M. and Moye-Rowley, W.S. (2010) Differential roles of transcriptional mediator subunits in regulation of multidrug resistance gene expression in *Saccharomyces cerevisiae*. *Mol Biol Cell*, **21**, 2469-2482.
53. Zhu, G., Spellman, P.T., Volpe, T., Brown, P.O., Botstein, D., Davis, T.N. and Futcher, B. (2000) Two yeast forkhead genes regulate the cell cycle and pseudohyphal growth. *Nature*, **406**, 90-94.

54. Mead, J., Zhong, H., Acton, T.B. and Vershon, A.K. (1996) The yeast alpha2 and Mcm1 proteins interact through a region similar to a motif found in homeodomain proteins of higher eukaryotes. *Mol Cell Biol*, **16**, 2135-2143.
55. Pramila, T., Miles, S., GuhaThakurta, D., Jemiolo, D. and Breeden, L.L. (2002) Conserved homeodomain proteins interact with MADS box protein Mcm1 to restrict ECB-dependent transcription to the M/G1 phase of the cell cycle. *Genes Dev*, **16**, 3034-3045.
56. Kumar, R., Reynolds, D.M., Shevchenko, A., Goldstone, S.D. and Dalton, S. (2000) Forkhead transcription factors, Fkh1p and Fkh2p, collaborate with Mcm1p to control transcription required for M-phase. *Current biology : CB*, **10**, 896-906.
57. Graves, J.A. and Henry, S.A. (2000) Regulation of the yeast INO1 gene. The products of the INO2, INO4 and OPI1 regulatory genes are not required for repression in response to inositol. *Genetics*, **154**, 1485-1495.
58. Lee, T.A., Jorgensen, P., Bogner, A.L., Peyraud, C., Thomas, D. and Tyers, M. (2010) Dissection of combinatorial control by the Met4 transcriptional complex. *Mol Biol Cell*, **21**, 456-469.
59. Angus-Hill, M.L., Schlichter, A., Roberts, D., Erdjument-Bromage, H., Tempst, P. and Cairns, B.R. (2001) A Rsc3/Rsc30 zinc cluster dimer reveals novel roles for the chromatin remodeler RSC in gene expression and cell cycle control. *Mol Cell*, **7**, 741-751.
60. Menon, B.B., Sarma, N.J., Pasula, S., Deminoff, S.J., Willis, K.A., Barbara, K.E., Andrews, B. and Santangelo, G.M. (2005) Reverse recruitment: the Nup84 nuclear pore subcomplex mediates Rap1/Gcr1/Gcr2 transcriptional activation. *Proc Natl Acad Sci U S A*, **102**, 5749-5754.
61. Breitkreutz, B.J., Stark, C., Reguly, T., Boucher, L., Breitkreutz, A., Livstone, M., Oughtred, R., Lackner, D.H., Bahler, J., Wood, V. *et al.* (2008) The BioGRID Interaction Database: 2008 update. *Nucleic Acids Res*, **36**, D637-640.
62. Robinson, K.A., Koepke, J.I., Kharodawala, M. and Lopes, J.M. (2000) A network of yeast basic helix-loop-helix interactions. *Nucleic Acids Res*, **28**, 4460-4466.
63. Badis, G., Chan, E.T., van Bakel, H., Pena-Castillo, L., Tillo, D., Tsui, K., Carlson, C.D., Gossett, A.J., Hasiñoff, M.J., Warren, C.L. *et al.* (2008) A library of yeast transcription factor motifs reveals a widespread function for Rsc3 in targeting nucleosome exclusion at promoters. *Mol Cell*, **32**, 878-887.
64. Cairns, B.R., Lorch, Y., Li, Y., Zhang, M., Lacomis, L., Erdjument-Bromage, H., Tempst, P., Du, J., Laurent, B. and Kornberg, R.D. (1996) RSC, an essential, abundant chromatin-remodeling complex. *Cell*, **87**, 1249-1260.



65. Krogan, N.J., Cagney, G., Yu, H., Zhong, G., Guo, X., Ignatchenko, A., Li, J., Pu, S., Datta, N., Tikuisis, A.P. *et al.* (2006) Global landscape of protein complexes in the yeast *Saccharomyces cerevisiae*. *Nature*, **440**, 637-643.
66. Zheng, J., Benschop, J.J., Shales, M., Kemmeren, P., Greenblatt, J., Cagney, G., Holstege, F., Li, H. and Krogan, N.J. (2010) Epistatic relationships reveal the functional organization of yeast transcription factors. *Molecular systems biology*, **6**, 420.
67. Cherry, J.M., Hong, E.L., Amundsen, C., Balakrishnan, R., Binkley, G., Chan, E.T., Christie, K.R., Costanzo, M.C., Dwight, S.S., Engel, S.R. *et al.* (2012) *Saccharomyces* Genome Database: the genomics resource of budding yeast. *Nucleic Acids Res*, **40**, D700-705.
68. Su, N.Y., Ouni, I., Papagiannis, C.V. and Kaiser, P. (2008) A dominant suppressor mutation of the *met30* cell cycle defect suggests regulation of the *Saccharomyces cerevisiae* Met4-Cbf1 transcription complex by Met32. *The Journal of biological chemistry*, **283**, 11615-11624.
69. Sudarsanam, P., Pilpel, Y. and Church, G.M. (2002) Genome-wide co-occurrence of promoter elements reveals a cis-regulatory cassette of rRNA transcription motifs in *Saccharomyces cerevisiae*. *Genome Res*, **12**, 1723-1731.
70. Hahn, S. and Young, E.T. (2011) Transcriptional regulation in *Saccharomyces cerevisiae*: transcription factor regulation and function, mechanisms of initiation, and roles of activators and coactivators. *Genetics*, **189**, 705-736.
71. Hollenhorst, P.C., Pietz, G. and Fox, C.A. (2001) Mechanisms controlling differential promoter-occupancy by the yeast forkhead proteins Fkh1p and Fkh2p: implications for regulating the cell cycle and differentiation. *Genes Dev*, **15**, 2445-2456.

Supplementary Table S2. List of TF pairs identified from 7 Genome search, and number of co-occurrences in promoters for each species. (Data also available in TableS2.xls)

| TFPair         | Cer. | Klu. | Mik. | Par. | Cas. | Bay. | Kud. |     |
|----------------|------|------|------|------|------|------|------|-----|
| ABF1xACA1      | 197  | 399  | 274  | 153  | 225  | 303  | 286  |     |
| ABF1xAFT2      | 224  | 486  | 235  | 239  | 194  | 351  | 211  |     |
| ABF1xBAS1      | 166  | 508  | 301  | 172  | 169  | 318  | 238  |     |
| ABF1xCBF1      | 264  | 429  | 230  | 274  | 202  | 452  | 287  |     |
| ABF1xCRZ1      | 206  | 389  | 255  | 141  | 167  | 239  | 244  |     |
| ABF1xCST6      | 176  | 171  | 133  | 139  | 106  | 185  | 189  |     |
| ABF1xDIG1      | 74   | 50   | 38   | 47   | 24   | 49   | 30   |     |
| ABF1xGCN4      | 183  | 393  | 235  | 142  | 166  | 204  | 216  |     |
| ABF1xGIS1      | 522  | 559  | 344  | 583  | 444  | 717  | 513  |     |
| ABF1xHAC1      | 167  | 425  | 206  | 167  | 181  | 275  | 291  |     |
| ABF1xHAP3      | 9    | 2    | 3    | 10   | 6    | 9    | 8    |     |
| ABF1xHAP5      | 9    | 5    | 5    | 11   | 4    | 18   | 16   |     |
| ABF1xHMS1      | 130  | 132  | 94   | 141  | 114  | 259  | 130  |     |
| ABF1xHSF1      | 59   | 51   | 31   | 44   | 20   | 45   | 33   |     |
| ABF1xIME1      | 92   | 33   | 46   | 94   | 32   | 115  | 71   |     |
| ABF1xINO2      | 155  | 187  | 124  | 182  | 116  | 236  | 147  |     |
| ABF1xINO4      | 120  | 130  | 73   | 146  | 71   | 140  | 121  |     |
| ABF1xMATALPHA2 |      | 905  | 1080 | 550  | 932  | 659  | 862  | 707 |
| ABF1xMBP1      | 137  | 330  | 199  | 146  | 143  | 260  | 253  |     |
| ABF1xMET28     | 155  | 328  | 189  | 132  | 128  | 206  | 195  |     |
| ABF1xMIG1      | 228  | 383  | 261  | 242  | 176  | 436  | 241  |     |
| ABF1xMIG3      | 168  | 206  | 166  | 163  | 182  | 270  | 252  |     |
| ABF1xPDR1      | 201  | 367  | 226  | 148  | 173  | 215  | 240  |     |
| ABF1xPDR3      | 55   | 22   | 28   | 46   | 52   | 67   | 27   |     |
| ABF1xPHD1      | 170  | 395  | 237  | 134  | 188  | 290  | 237  |     |
| ABF1xPHO4      | 198  | 272  | 133  | 216  | 122  | 341  | 169  |     |
| ABF1xRDS1      | 122  | 92   | 84   | 121  | 83   | 224  | 138  |     |
| ABF1xREB1      | 127  | 201  | 143  | 135  | 136  | 177  | 180  |     |
| ABF1xRGM1      | 522  | 559  | 344  | 583  | 444  | 717  | 513  |     |
| ABF1xRPN4      | 153  | 174  | 99   | 162  | 76   | 173  | 126  |     |
| ABF1xRSC30     | 23   | 10   | 3    | 17   | 7    | 68   | 19   |     |

|              |     |     |     |     |     |     |     |
|--------------|-----|-----|-----|-----|-----|-----|-----|
| ABF1xRSC3    | 177 | 311 | 273 | 153 | 216 | 354 | 302 |
| ABF1xRTG3    | 155 | 373 | 222 | 154 | 159 | 246 | 199 |
| ABF1xSKN7    | 157 | 388 | 251 | 171 | 179 | 317 | 276 |
| ABF1xSKO1    | 165 | 453 | 232 | 189 | 141 | 327 | 248 |
| ABF1xSTB1    | 140 | 339 | 229 | 139 | 185 | 226 | 248 |
| ABF1xSTB2    | 117 | 295 | 191 | 133 | 150 | 181 | 220 |
| ABF1xSTB3    | 219 | 164 | 142 | 190 | 159 | 247 | 187 |
| ABF1xSTP1    | 181 | 326 | 187 | 159 | 186 | 315 | 246 |
| ABF1xSTP2    | 54  | 60  | 36  | 68  | 37  | 137 | 95  |
| ABF1xSUM1    | 70  | 68  | 41  | 81  | 75  | 82  | 69  |
| ABF1xSUT1    | 187 | 336 | 243 | 182 | 193 | 314 | 290 |
| ABF1xSWI4    | 215 | 342 | 232 | 135 | 168 | 261 | 232 |
| ABF1xSWI6    | 138 | 320 | 212 | 150 | 145 | 208 | 217 |
| ABF1xTBF1    | 192 | 370 | 209 | 152 | 175 | 233 | 185 |
| ABF1xTYE7    | 243 | 405 | 203 | 224 | 188 | 389 | 279 |
| ABF1xUME6    | 140 | 36  | 49  | 148 | 85  | 173 | 133 |
| ABF1xYDR026C | 144 | 180 | 101 | 160 | 99  | 191 | 120 |
| ABF1xYER184C | 238 | 394 | 294 | 164 | 224 | 354 | 296 |
| ABF1xYJL103C | 428 | 546 | 257 | 436 | 277 | 549 | 329 |
| ABF1xYLL054C | 16  | 28  | 2   | 26  | 21  | 83  | 27  |
| ABF1xYPR196W | 142 | 308 | 220 | 124 | 153 | 202 | 216 |
| ABF1xZAP1    | 6   | 6   | 1   | 8   | 1   | 2   | 2   |
| ABF1xZMS1    | 177 | 445 | 253 | 212 | 245 | 309 | 318 |
| ABF2xXBP1    | 315 | 587 | 575 | 344 | 298 | 278 | 517 |
| ACA1xAFT2    | 269 | 583 | 480 | 284 | 345 | 392 | 327 |
| ACA1xCAT8    | 194 | 539 | 442 | 174 | 329 | 290 | 343 |
| ACA1xGAL80   | 18  | 11  | 17  | 8   | 16  | 38  | 4   |
| ACA1xGCN4    | 223 | 477 | 335 | 151 | 283 | 241 | 279 |
| ACA1xGIS1    | 601 | 726 | 683 | 663 | 744 | 826 | 709 |
| ACA1xMET31   | 187 | 463 | 334 | 175 | 316 | 313 | 325 |
| ACA1xMIG1    | 265 | 579 | 421 | 280 | 302 | 483 | 358 |
| ACA1xMIG3    | 193 | 332 | 279 | 158 | 297 | 321 | 370 |
| ACA1xMSN2    | 214 | 532 | 544 | 244 | 398 | 300 | 396 |
| ACA1xMSN4    | 333 | 475 | 461 | 357 | 398 | 462 | 396 |
| ACA1xNHP10   | 62  | 87  | 62  | 47  | 72  | 105 | 97  |

|              |     |     |     |     |     |     |     |
|--------------|-----|-----|-----|-----|-----|-----|-----|
| ACA1xOPI1    | 52  | 111 | 52  | 58  | 95  | 49  | 58  |
| ACA1xPHD1    | 208 | 574 | 450 | 162 | 352 | 363 | 347 |
| ACA1xRDS1    | 126 | 165 | 172 | 167 | 121 | 274 | 196 |
| ACA1xRGM1    | 601 | 726 | 683 | 663 | 744 | 826 | 709 |
| ACA1xRPH1    | 183 | 226 | 151 | 183 | 185 | 338 | 207 |
| ACA1xRPN4    | 103 | 187 | 131 | 115 | 118 | 153 | 123 |
| ACA1xRSC3    | 178 | 679 | 481 | 138 | 323 | 352 | 385 |
| ACA1xRTG3    | 166 | 484 | 419 | 187 | 280 | 280 | 305 |
| ACA1xSKN7    | 182 | 581 | 443 | 194 | 404 | 319 | 298 |
| ACA1xSTP1    | 206 | 458 | 372 | 158 | 295 | 320 | 327 |
| ACA1xSTP3    | 288 | 422 | 452 | 309 | 409 | 323 | 289 |
| ACA1xSUT1    | 211 | 641 | 458 | 156 | 361 | 334 | 335 |
| ACA1xSWI6    | 162 | 448 | 373 | 171 | 268 | 229 | 280 |
| ACA1xUME6    | 85  | 46  | 86  | 78  | 86  | 133 | 121 |
| ACA1xYER184C | 246 | 556 | 478 | 166 | 466 | 434 | 439 |
| ACA1xYJL103C | 423 | 642 | 441 | 504 | 565 | 703 | 547 |
| ACA1xYLL054C | 28  | 29  | 20  | 30  | 36  | 82  | 44  |
| ACA1xYPL230W | 601 | 726 | 683 | 663 | 744 | 826 | 709 |
| ACA1xZMS1    | 227 | 633 | 483 | 233 | 397 | 381 | 467 |
| ACE2xCBF1    | 159 | 419 | 259 | 190 | 294 | 266 | 298 |
| ACE2xMET28   | 151 | 340 | 334 | 212 | 328 | 298 | 324 |
| ACE2xMET31   | 172 | 342 | 345 | 204 | 337 | 309 | 394 |
| ACE2xRSC30   | 39  | 21  | 25  | 19  | 26  | 47  | 31  |
| ACE2xRSC3    | 232 | 485 | 522 | 157 | 384 | 289 | 388 |
| ACE2xSKN7    | 174 | 443 | 537 | 226 | 400 | 322 | 432 |
| ACE2xSWI5    | 370 | 581 | 572 | 664 | 555 | 608 | 512 |
| ACE2xTYE7    | 165 | 399 | 221 | 168 | 262 | 260 | 262 |
| AFT1xAFT2    | 88  | 43  | 44  | 85  | 48  | 87  | 45  |
| AFT1xRCS1    | 61  | 40  | 40  | 58  | 36  | 75  | 48  |
| AFT2xCAT8    | 312 | 584 | 472 | 290 | 381 | 379 | 366 |
| AFT2xCBF1    | 304 | 574 | 235 | 350 | 259 | 532 | 291 |
| AFT2xFHL1    | 353 | 426 | 279 | 246 | 333 | 361 | 289 |
| AFT2xINO2    | 251 | 290 | 164 | 300 | 168 | 303 | 205 |
| AFT2xMET31   | 280 | 505 | 305 | 254 | 326 | 363 | 302 |
| AFT2xMIG1    | 396 | 626 | 435 | 466 | 392 | 645 | 349 |

|              |     |     |     |     |     |     |     |
|--------------|-----|-----|-----|-----|-----|-----|-----|
| AFT2xMIG3    | 327 | 349 | 293 | 307 | 360 | 417 | 359 |
| AFT2xPHD1    | 326 | 590 | 415 | 257 | 394 | 466 | 366 |
| AFT2xPHO4    | 283 | 385 | 149 | 289 | 170 | 404 | 201 |
| AFT2xRAP1    | 243 | 161 | 107 | 126 | 145 | 192 | 93  |
| AFT2xRCS1    | 383 | 694 | 478 | 371 | 352 | 535 | 342 |
| AFT2xRPH1    | 319 | 299 | 162 | 301 | 209 | 407 | 208 |
| AFT2xRPN4    | 161 | 199 | 111 | 188 | 94  | 204 | 111 |
| AFT2xRSC3    | 329 | 642 | 452 | 333 | 357 | 507 | 366 |
| AFT2xSFP1    | 296 | 516 | 367 | 242 | 332 | 320 | 318 |
| AFT2xSTB2    | 253 | 475 | 362 | 263 | 323 | 317 | 311 |
| AFT2xSTP1    | 292 | 555 | 321 | 319 | 335 | 395 | 333 |
| AFT2xSUT1    | 351 | 614 | 500 | 332 | 394 | 491 | 350 |
| AFT2xTYE7    | 278 | 520 | 193 | 302 | 236 | 426 | 232 |
| AFT2xYJL103C | 668 | 673 | 447 | 945 | 552 | 856 | 486 |
| AFT2xZMS1    | 388 | 830 | 500 | 412 | 489 | 537 | 424 |
| ARG80xBAS1   | 234 | 477 | 431 | 226 | 228 | 357 | 320 |
| ARG80xGCN4   | 265 | 363 | 349 | 174 | 214 | 263 | 305 |
| ARG80xMIG1   | 261 | 389 | 365 | 216 | 254 | 387 | 317 |
| ARG80xMIG3   | 211 | 209 | 232 | 124 | 254 | 235 | 298 |
| ARG80xSTB3   | 160 | 183 | 200 | 151 | 210 | 239 | 222 |
| ARG80xSUT1   | 208 | 345 | 382 | 138 | 235 | 262 | 332 |
| ARG80xSUT2   | 56  | 80  | 51  | 63  | 90  | 59  | 56  |
| ARG80xZMS1   | 241 | 419 | 382 | 197 | 297 | 307 | 401 |
| ARG81xBAS1   | 151 | 159 | 151 | 179 | 137 | 237 | 175 |
| ARG81xCAT8   | 155 | 165 | 113 | 138 | 156 | 237 | 161 |
| ARG81xGCN4   | 151 | 150 | 120 | 137 | 148 | 151 | 165 |
| ARG81xMIG1   | 178 | 185 | 123 | 233 | 136 | 305 | 137 |
| ARG81xMIG3   | 125 | 107 | 76  | 163 | 136 | 174 | 156 |
| ARG81xOPI1   | 40  | 32  | 22  | 58  | 28  | 36  | 32  |
| ARG81xPHO4   | 122 | 101 | 53  | 125 | 94  | 164 | 92  |
| ARG81xRDS1   | 90  | 43  | 40  | 102 | 90  | 185 | 68  |
| ARG81xRPH1   | 98  | 88  | 40  | 176 | 84  | 203 | 101 |
| ARG81xRSC30  | 36  | 8   | 11  | 20  | 20  | 52  | 15  |
| ARG81xRSC3   | 159 | 157 | 139 | 145 | 166 | 246 | 213 |
| ARG81xRTG3   | 119 | 138 | 125 | 158 | 140 | 173 | 191 |

|                  |     |     |     |     |     |     |     |    |
|------------------|-----|-----|-----|-----|-----|-----|-----|----|
| ARG81xSKN7       | 142 | 169 | 129 | 173 | 187 | 241 | 153 |    |
| ARG81xSTB4       | 105 | 48  | 46  | 103 | 63  | 111 | 68  |    |
| ARG81xSTP1       | 152 | 149 | 102 | 158 | 135 | 253 | 193 |    |
| ARG81xSTP2       | 39  | 20  | 24  | 63  | 29  | 69  | 49  |    |
| ARG81xSTP3       | 209 | 148 | 115 | 242 | 158 | 239 | 139 |    |
| ARG81xSUT1       | 153 | 147 | 123 | 145 | 153 | 260 | 151 |    |
| ARG81xUME6       | 69  | 12  | 24  | 81  | 37  | 95  | 47  |    |
| ARG81xYJL103C321 |     | 215 | 118 | 457 | 231 | 400 | 215 |    |
| ARO80xCST6       | 10  | 12  | 7   | 19  | 9   | 13  | 21  |    |
| ARO80xIME1       | 13  | 4   | 0   | 10  | 5   | 18  | 5   |    |
| ARO80xMIG1       | 22  | 22  | 16  | 29  | 19  | 35  | 31  |    |
| ARO80xPDR1       | 21  | 28  | 9   | 36  | 9   | 36  | 15  |    |
| ARO80xPDR3       | 15  | 3   | 0   | 14  | 7   | 4   | 4   |    |
| ARO80xPHD1       | 19  | 16  | 9   | 16  | 8   | 42  | 16  |    |
| ARO80xRDR1       | 21  | 14  | 5   | 11  | 5   | 19  | 17  |    |
| ARO80xRDS1       | 29  | 10  | 3   | 34  | 4   | 37  | 11  |    |
| ARO80xRSC3       | 23  | 13  | 14  | 21  | 12  | 36  | 12  |    |
| ARO80xSTB4       | 8   | 7   | 7   | 24  | 5   | 20  | 10  |    |
| ARO80xSTP1       | 30  | 25  | 13  | 22  | 12  | 39  | 22  |    |
| ARO80xSUT1       | 28  | 20  | 10  | 24  | 19  | 36  | 30  |    |
| ARO80xUME6       | 13  | 0   | 5   | 20  | 9   | 10  | 9   |    |
| ARO80xYER184C    |     | 24  | 26  | 8   | 15  | 9   | 43  | 31 |
| ARO80xYRM1       | 11  | 27  | 6   | 21  | 5   | 25  | 11  |    |
| ARR1xNHP6B       | 30  | 45  | 15  | 25  | 35  | 35  | 40  |    |
| ASG1xGIS1        | 1   | 7   | 0   | 5   | 11  | 12  | 3   |    |
| ASG1xPHD1        | 2   | 7   | 2   | 0   | 6   | 2   | 3   |    |
| ASG1xRGM1        | 1   | 7   | 0   | 5   | 11  | 12  | 3   |    |
| ASG1xSTB5        | 4   | 4   | 4   | 4   | 2   | 2   | 3   |    |
| ASG1xSTP1        | 2   | 4   | 2   | 0   | 8   | 8   | 3   |    |
| ASG1xSTP3        | 4   | 5   | 2   | 3   | 2   | 5   | 2   |    |
| ASG1xYPL230W1    |     | 7   | 0   | 5   | 11  | 12  | 3   |    |
| ASH1xCBF1        | 70  | 47  | 39  | 106 | 59  | 128 | 76  |    |
| ASH1xDAL82       | 75  | 102 | 73  | 90  | 82  | 113 | 90  |    |
| ASH1xMBP1        | 93  | 83  | 106 | 98  | 119 | 132 | 101 |    |
| ASH1xMCM1        | 60  | 15  | 20  | 58  | 72  | 50  | 33  |    |

|              |     |     |     |     |     |     |     |    |
|--------------|-----|-----|-----|-----|-----|-----|-----|----|
| ASH1xNDD1    | 48  | 17  | 18  | 58  | 72  | 54  | 29  |    |
| ASH1xNHP10   | 25  | 14  | 20  | 34  | 33  | 49  | 25  |    |
| ASH1xOPI1    | 19  | 10  | 18  | 24  | 26  | 31  | 18  |    |
| ASH1xRSC3    | 97  | 121 | 77  | 81  | 77  | 133 | 100 |    |
| ASH1xSTP1    | 67  | 68  | 46  | 77  | 84  | 109 | 70  |    |
| ASH1xSWI6    | 83  | 84  | 99  | 94  | 94  | 113 | 105 |    |
| ASH1xTYE7    | 75  | 41  | 38  | 94  | 53  | 81  | 63  |    |
| ASH1xYPR196W |     | 60  | 65  | 55  | 89  | 94  | 86  | 87 |
| AZF1xECM23   | 99  | 44  | 46  | 135 | 20  | 74  | 66  |    |
| AZF1xEDS1    | 44  | 37  | 17  | 59  | 10  | 40  | 23  |    |
| BAS1xGCN4    | 309 | 544 | 471 | 288 | 245 | 400 | 311 |    |
| BAS1xRTG3    | 206 | 497 | 482 | 255 | 254 | 419 | 308 |    |
| BAS1xSTP3    | 296 | 490 | 492 | 380 | 295 | 423 | 345 |    |
| CAD1xCBFI    | 140 | 65  | 63  | 102 | 63  | 115 | 102 |    |
| CAD1xUSV1    | 8   | 0   | 4   | 4   | 1   | 4   | 5   |    |
| CAD1xYAP7    | 138 | 26  | 38  | 154 | 78  | 68  | 72  |    |
| CAD1xYKL222C | 3   | 0   | 2   | 11  | 2   | 5   | 2   |    |
| CAT8xDAL82   | 182 | 421 | 427 | 175 | 265 | 277 | 327 |    |
| CAT8xGAL4    | 6   | 1   | 9   | 6   | 13  | 13  | 4   |    |
| CAT8xGIS1    | 667 | 653 | 609 | 634 | 658 | 830 | 760 |    |
| CAT8xHAC1    | 161 | 469 | 425 | 174 | 308 | 357 | 440 |    |
| CAT8xLYS14   | 203 | 366 | 322 | 140 | 244 | 263 | 312 |    |
| CAT8xMIG1    | 327 | 540 | 497 | 286 | 340 | 464 | 392 |    |
| CAT8xMIG3    | 245 | 313 | 314 | 200 | 299 | 323 | 420 |    |
| CAT8xMSN2    | 250 | 524 | 480 | 251 | 360 | 287 | 438 |    |
| CAT8xMSN4    | 386 | 438 | 442 | 355 | 360 | 469 | 438 |    |
| CAT8xNHP10   | 52  | 83  | 70  | 52  | 64  | 97  | 114 |    |
| CAT8xNRG1    | 254 | 316 | 357 | 151 | 310 | 286 | 375 |    |
| CAT8xOPI1    | 56  | 95  | 67  | 51  | 52  | 65  | 56  |    |
| CAT8xPDR1    | 246 | 487 | 451 | 208 | 327 | 358 | 312 |    |
| CAT8xPDR3    | 54  | 36  | 52  | 56  | 45  | 71  | 63  |    |
| CAT8xPHD1    | 213 | 525 | 419 | 169 | 368 | 362 | 385 |    |
| CAT8xRCS1    | 250 | 511 | 437 | 181 | 324 | 326 | 331 |    |
| CAT8xRDS1    | 136 | 135 | 133 | 142 | 207 | 321 | 185 |    |
| CAT8xRDS2    | 257 | 541 | 414 | 168 | 324 | 252 | 368 |    |

|              |     |     |     |     |     |     |     |
|--------------|-----|-----|-----|-----|-----|-----|-----|
| CAT8xREB1    | 149 | 189 | 261 | 127 | 272 | 220 | 248 |
| CAT8xRGM1    | 667 | 653 | 609 | 634 | 658 | 830 | 760 |
| CAT8xRPH1    | 206 | 232 | 172 | 161 | 158 | 344 | 256 |
| CAT8xRSC3    | 267 | 573 | 575 | 180 | 334 | 465 | 445 |
| CAT8xRTG3    | 144 | 389 | 398 | 166 | 250 | 229 | 310 |
| CAT8xSKN7    | 246 | 497 | 523 | 192 | 405 | 429 | 389 |
| CAT8xSTB1    | 143 | 438 | 387 | 167 | 248 | 247 | 333 |
| CAT8xSTB2    | 142 | 349 | 343 | 136 | 272 | 223 | 314 |
| CAT8xSTB4    | 152 | 198 | 165 | 141 | 186 | 173 | 158 |
| CAT8xSTB5    | 180 | 413 | 406 | 147 | 241 | 266 | 285 |
| CAT8xSTP1    | 239 | 523 | 387 | 216 | 271 | 468 | 360 |
| CAT8xSTP2    | 61  | 96  | 88  | 66  | 47  | 155 | 111 |
| CAT8xSUT1    | 256 | 576 | 559 | 204 | 380 | 419 | 381 |
| CAT8xSWI5    | 353 | 581 | 470 | 455 | 431 | 593 | 469 |
| CAT8xUGA3    | 93  | 101 | 73  | 93  | 93  | 175 | 86  |
| CAT8xUME6    | 135 | 55  | 92  | 142 | 88  | 158 | 118 |
| CAT8xYBL054W | 235 | 484 | 437 | 160 | 352 | 359 | 397 |
| CAT8xYDR026C | 155 | 177 | 182 | 139 | 198 | 226 | 166 |
| CAT8xYDR520C | 28  | 29  | 20  | 14  | 16  | 33  | 32  |
| CAT8xYER184C | 373 | 483 | 533 | 167 | 434 | 443 | 462 |
| CAT8xYJL103C | 589 | 593 | 456 | 523 | 505 | 661 | 546 |
| CAT8xYLL054C | 41  | 63  | 22  | 38  | 62  | 158 | 44  |
| CAT8xYPL230W | 667 | 653 | 609 | 634 | 658 | 830 | 760 |
| CAT8xYPR196W | 199 | 385 | 395 | 157 | 245 | 226 | 276 |
| CAT8xYRM1    | 188 | 384 | 353 | 169 | 275 | 349 | 354 |
| CAT8xZMS1    | 277 | 640 | 495 | 251 | 397 | 430 | 494 |
| CBF1xCRZ1    | 243 | 529 | 340 | 142 | 334 | 335 | 284 |
| CBF1xDAL81   | 28  | 2   | 7   | 20  | 5   | 17  | 8   |
| CBF1xDAL82   | 185 | 407 | 302 | 148 | 335 | 335 | 291 |
| CBF1xFHL1    | 156 | 353 | 145 | 154 | 245 | 294 | 247 |
| CBF1xGAT1    | 376 | 541 | 308 | 423 | 315 | 387 | 342 |
| CBF1xGCN4    | 238 | 406 | 266 | 180 | 237 | 300 | 281 |
| CBF1xHAC1    | 186 | 602 | 307 | 162 | 254 | 409 | 306 |
| CBF1xHAP1    | 82  | 91  | 41  | 110 | 46  | 112 | 64  |
| CBF1xHAP5    | 6   | 21  | 0   | 4   | 6   | 8   | 10  |



|                |     |      |     |      |     |      |     |  |
|----------------|-----|------|-----|------|-----|------|-----|--|
| CBF1xHMS1      | 150 | 172  | 104 | 180  | 107 | 307  | 169 |  |
| CBF1xINO2      | 226 | 373  | 154 | 278  | 232 | 349  | 209 |  |
| CBF1xINO4      | 162 | 221  | 106 | 198  | 142 | 211  | 138 |  |
| CBF1xMATALPHA2 | 848 | 1337 | 676 | 1038 | 851 | 1098 | 931 |  |
| CBF1xMBP1      | 178 | 507  | 228 | 208  | 247 | 382  | 265 |  |
| CBF1xMET28     | 212 | 416  | 255 | 139  | 227 | 314  | 230 |  |
| CBF1xMET31     | 188 | 421  | 211 | 166  | 245 | 336  | 268 |  |
| CBF1xMET32     | 278 | 327  | 172 | 250  | 306 | 332  | 228 |  |
| CBF1xMET4      | 54  | 46   | 32  | 71   | 55  | 71   | 20  |  |
| CBF1xOAF1      | 86  | 198  | 54  | 118  | 135 | 134  | 112 |  |
| CBF1xPDR3      | 112 | 35   | 40  | 104  | 53  | 113  | 53  |  |
| CBF1xPDR8      | 159 | 368  | 185 | 149  | 248 | 332  | 252 |  |
| CBF1xPHD1      | 228 | 499  | 293 | 146  | 339 | 380  | 338 |  |
| CBF1xPHO4      | 311 | 539  | 205 | 338  | 223 | 518  | 263 |  |
| CBF1xRAP1      | 104 | 102  | 46  | 80   | 95  | 134  | 77  |  |
| CBF1xRDS2      | 184 | 554  | 234 | 178  | 232 | 272  | 306 |  |
| CBF1xREB1      | 242 | 230  | 257 | 270  | 275 | 354  | 269 |  |
| CBF1xRPH1      | 222 | 189  | 91  | 232  | 141 | 309  | 236 |  |
| CBF1xRSC3      | 156 | 503  | 365 | 192  | 386 | 511  | 394 |  |
| CBF1xRTG3      | 180 | 397  | 308 | 202  | 271 | 400  | 264 |  |
| CBF1xSFP1      | 188 | 473  | 198 | 210  | 226 | 302  | 249 |  |
| CBF1xSTB2      | 246 | 369  | 306 | 266  | 245 | 312  | 308 |  |
| CBF1xSTB4      | 134 | 229  | 101 | 176  | 132 | 185  | 138 |  |
| CBF1xSTP1      | 234 | 506  | 209 | 180  | 318 | 386  | 304 |  |
| CBF1xSUT1      | 242 | 443  | 303 | 214  | 386 | 458  | 338 |  |
| CBF1xTBF1      | 185 | 329  | 234 | 154  | 224 | 313  | 224 |  |
| CBF1xTYE7      | 439 | 801  | 368 | 414  | 290 | 699  | 303 |  |
| CBF1xYDR026C   | 172 | 193  | 135 | 194  | 203 | 322  | 194 |  |
| CBF1xYDR520C   | 24  | 40   | 8   | 28   | 10  | 20   | 24  |  |
| CBF1xYER184C   | 253 | 435  | 293 | 183  | 368 | 499  | 460 |  |
| CBF1xYJL103C   | 443 | 640  | 247 | 543  | 422 | 769  | 535 |  |
| CBF1xYLL054C   | 20  | 31   | 6   | 56   | 68  | 122  | 27  |  |
| CBF1xYOX1      | 54  | 34   | 45  | 49   | 41  | 37   | 40  |  |
| CBF1xYRM1      | 194 | 469  | 233 | 250  | 257 | 409  | 291 |  |
| CEP3xMIG3      | 179 | 287  | 277 | 170  | 288 | 223  | 375 |  |

|               |     |     |     |     |     |     |     |   |
|---------------|-----|-----|-----|-----|-----|-----|-----|---|
| CEP3xRDS1     | 101 | 129 | 123 | 118 | 104 | 203 | 163 |   |
| CEP3xSTB3     | 143 | 173 | 201 | 132 | 182 | 225 | 195 |   |
| CEP3xSTB4     | 134 | 174 | 180 | 153 | 155 | 140 | 158 |   |
| CEP3xYNR063W  |     | 1   | 4   | 7   | 4   | 4   | 5   | 9 |
| CHA4xGIS1     | 0   | 4   | 0   | 0   | 10  | 10  | 2   |   |
| CHA4xRGM1     | 0   | 4   | 0   | 0   | 10  | 10  | 2   |   |
| CHA4xYPL230W0 |     | 4   | 0   | 0   | 10  | 10  | 2   |   |
| CIN5xHMRA2    | 229 | 174 | 226 | 198 | 377 | 301 | 234 |   |
| CIN5xMET4     | 23  | 11  | 9   | 26  | 33  | 13  | 18  |   |
| CIN5xMIG3     | 202 | 79  | 130 | 158 | 300 | 155 | 184 |   |
| CIN5xNHP6A    | 152 | 125 | 203 | 155 | 242 | 142 | 148 |   |
| CIN5xNRG1     | 207 | 107 | 137 | 150 | 260 | 169 | 180 |   |
| CIN5xPDR3     | 65  | 5   | 19  | 34  | 71  | 36  | 17  |   |
| CIN5xPDR8     | 215 | 111 | 147 | 152 | 271 | 179 | 172 |   |
| CIN5xREB1     | 133 | 82  | 97  | 131 | 310 | 112 | 109 |   |
| CIN5xRGT1     | 230 | 138 | 196 | 166 | 249 | 153 | 194 |   |
| CIN5xSTB2     | 146 | 121 | 149 | 144 | 284 | 121 | 149 |   |
| CIN5xBBP1     | 207 | 162 | 213 | 242 | 463 | 197 | 187 |   |
| CIN5xYDR026C  | 86  | 65  | 59  | 84  | 187 | 80  | 54  |   |
| CIN5xYPR196W  | 199 | 135 | 194 | 130 | 233 | 152 | 170 |   |
| CRZ1xGIS1     | 703 | 695 | 702 | 666 | 688 | 903 | 795 |   |
| CRZ1xINO2     | 192 | 273 | 223 | 159 | 202 | 219 | 206 |   |
| CRZ1xMSN2     | 266 | 559 | 551 | 241 | 364 | 307 | 464 |   |
| CRZ1xPDR1     | 223 | 439 | 495 | 165 | 286 | 276 | 369 |   |
| CRZ1xPDR3     | 77  | 23  | 55  | 54  | 66  | 63  | 68  |   |
| CRZ1xRDS1     | 152 | 126 | 122 | 143 | 132 | 263 | 221 |   |
| CRZ1xRGM1     | 703 | 695 | 702 | 666 | 688 | 903 | 795 |   |
| CRZ1xSTP1     | 251 | 422 | 412 | 198 | 258 | 375 | 334 |   |
| CRZ1xSUT1     | 275 | 462 | 558 | 191 | 306 | 375 | 397 |   |
| CRZ1xSWI5     | 440 | 537 | 555 | 475 | 441 | 603 | 537 |   |
| CRZ1xTYE7     | 241 | 471 | 269 | 140 | 265 | 261 | 252 |   |
| CRZ1xYJL103C  | 499 | 611 | 501 | 547 | 415 | 643 | 576 |   |
| CRZ1xYPL230W  | 703 | 695 | 702 | 666 | 688 | 903 | 795 |   |
| CST6xNDD1     | 41  | 33  | 38  | 56  | 121 | 81  | 67  |   |
| CST6xSUT1     | 178 | 156 | 218 | 140 | 203 | 249 | 271 |   |

|              |     |     |     |     |     |     |     |
|--------------|-----|-----|-----|-----|-----|-----|-----|
| CST6xSWI6    | 211 | 173 | 210 | 138 | 172 | 226 | 276 |
| CST6xYER184C | 216 | 154 | 215 | 200 | 249 | 328 | 319 |
| CST6xYJL103C | 376 | 230 | 204 | 531 | 335 | 529 | 413 |
| CST6xYLL054C | 14  | 13  | 9   | 21  | 26  | 55  | 24  |
| CUP9xECM23   | 191 | 83  | 78  | 163 | 162 | 193 | 84  |
| CUP9xGAT3    | 29  | 33  | 34  | 35  | 31  | 64  | 31  |
| CUP9xRAP1    | 24  | 15  | 12  | 7   | 17  | 16  | 4   |
| CUP9xRSC30   | 10  | 0   | 6   | 12  | 14  | 20  | 3   |
| CUP9xRSC3    | 56  | 47  | 45  | 44  | 87  | 59  | 46  |
| CUP9xSFP1    | 36  | 43  | 40  | 26  | 30  | 34  | 25  |
| CUP9xSTP1    | 40  | 43  | 23  | 32  | 35  | 52  | 32  |
| DAL80xGAT1   | 511 | 499 | 638 | 686 | 701 | 632 | 457 |
| DAL80xGLN3   | 311 | 430 | 541 | 413 | 457 | 555 | 443 |
| DAL80xGZF3   | 514 | 287 | 466 | 691 | 702 | 635 | 459 |
| DAL80xHAP1   | 72  | 89  | 64  | 84  | 83  | 81  | 61  |
| DAL80xBBP1   | 245 | 426 | 386 | 312 | 435 | 387 | 314 |
| DAL82xEDS1   | 415 | 504 | 401 | 456 | 294 | 433 | 471 |
| DAL82xHAP3   | 7   | 3   | 13  | 5   | 15  | 15  | 16  |
| DAL82xIME1   | 60  | 43  | 55  | 59  | 48  | 95  | 63  |
| DAL82xLYS14  | 218 | 377 | 389 | 148 | 234 | 286 | 282 |
| DAL82xMBP1   | 186 | 518 | 397 | 192 | 256 | 253 | 349 |
| DAL82xMCM1   | 119 | 76  | 82  | 99  | 122 | 103 | 74  |
| DAL82xOPI1   | 55  | 77  | 46  | 51  | 60  | 69  | 51  |
| DAL82xPDR1   | 187 | 409 | 378 | 165 | 293 | 247 | 289 |
| DAL82xPHD1   | 202 | 505 | 442 | 161 | 255 | 292 | 347 |
| DAL82xRDS1   | 111 | 122 | 93  | 130 | 147 | 259 | 178 |
| DAL82xREB1   | 153 | 192 | 232 | 142 | 209 | 212 | 248 |
| DAL82xRSC3   | 160 | 543 | 370 | 163 | 333 | 278 | 373 |
| DAL82xSTB1   | 195 | 445 | 355 | 133 | 249 | 221 | 355 |
| DAL82xSTB2   | 147 | 338 | 333 | 138 | 224 | 187 | 298 |
| DAL82xSTB3   | 172 | 141 | 175 | 132 | 209 | 179 | 203 |
| DAL82xSTP1   | 202 | 472 | 357 | 185 | 239 | 282 | 333 |
| DAL82xSUT1   | 195 | 499 | 420 | 174 | 311 | 322 | 332 |
| DAL82xSWI4   | 235 | 443 | 361 | 128 | 230 | 258 | 310 |
| DAL82xTYE7   | 161 | 359 | 248 | 133 | 253 | 259 | 238 |

|               |      |      |      |      |      |      |      |     |
|---------------|------|------|------|------|------|------|------|-----|
| DAL82xUME6    | 89   | 40   | 94   | 101  | 62   | 122  | 88   |     |
| DAL82xYER184C |      | 271  | 436  | 452  | 157  | 328  | 397  | 424 |
| DIG1xSTE12    | 59   | 67   | 82   | 72   | 50   | 77   | 51   |     |
| ECM23xGAT4    | 1065 | 1112 | 1124 | 1069 | 1576 | 1206 | 1178 |     |
| ECM23xGCR1    | 587  | 327  | 269  | 669  | 513  | 561  | 402  |     |
| ECM23xMET32   | 1007 | 784  | 564  | 1044 | 1237 | 1036 | 903  |     |
| ECM23xMET4    | 182  | 76   | 53   | 170  | 159  | 155  | 88   |     |
| EDS1xGAL80    | 26   | 17   | 5    | 25   | 12   | 46   | 19   |     |
| EDS1xHSF1     | 110  | 41   | 51   | 111  | 56   | 82   | 84   |     |
| EDS1xMBP1     | 437  | 468  | 397  | 479  | 297  | 480  | 505  |     |
| EDS1xPBF1     | 194  | 96   | 79   | 197  | 73   | 167  | 108  |     |
| EDS1xPBF2     | 432  | 463  | 263  | 451  | 260  | 500  | 373  |     |
| EDS1xRDR1     | 489  | 246  | 219  | 596  | 229  | 460  | 446  |     |
| EDS1xRGT1     | 604  | 586  | 453  | 611  | 370  | 552  | 568  |     |
| EDS1xSTB3     | 484  | 206  | 217  | 497  | 273  | 452  | 372  |     |
| EDS1xSTP1     | 492  | 462  | 321  | 517  | 258  | 475  | 497  |     |
| EDS1xYRM1     | 486  | 521  | 380  | 544  | 337  | 696  | 612  |     |
| FHL1xINO4     | 106  | 108  | 89   | 129  | 129  | 117  | 125  |     |
| FHL1xMET31    | 184  | 285  | 218  | 137  | 255  | 234  | 282  |     |
| FHL1xMIG1     | 241  | 373  | 280  | 247  | 304  | 433  | 299  |     |
| FHL1xMIG3     | 192  | 202  | 186  | 134  | 288  | 253  | 315  |     |
| FHL1xOPI1     | 59   | 79   | 35   | 63   | 62   | 49   | 53   |     |
| FHL1xPHO4     | 197  | 223  | 99   | 138  | 132  | 209  | 186  |     |
| FHL1xRAP1     | 239  | 140  | 84   | 119  | 160  | 124  | 104  |     |
| FHL1xRCS1     | 208  | 379  | 279  | 156  | 274  | 300  | 279  |     |
| FHL1xRPH1     | 197  | 152  | 109  | 172  | 165  | 280  | 209  |     |
| FHL1xRSC3     | 258  | 553  | 241  | 169  | 312  | 298  | 358  |     |
| FHL1xSFP1     | 297  | 374  | 277  | 200  | 288  | 269  | 275  |     |
| FHL1xSTP2     | 60   | 66   | 41   | 74   | 38   | 84   | 57   |     |
| FHL1xTYE7     | 165  | 326  | 113  | 128  | 206  | 239  | 225  |     |
| FHL1xYJL103C  | 473  | 456  | 302  | 524  | 438  | 620  | 432  |     |
| FKH1xFKH2     | 327  | 487  | 433  | 200  | 449  | 372  | 322  |     |
| FKH1xHCM1     | 754  | 558  | 645  | 763  | 899  | 733  | 632  |     |
| FKH1xMBP1     | 201  | 413  | 379  | 217  | 328  | 286  | 348  |     |
| FKH1xMCM1     | 100  | 49   | 60   | 81   | 147  | 113  | 91   |     |

|               |      |     |     |      |      |     |     |    |
|---------------|------|-----|-----|------|------|-----|-----|----|
| FKH1xNDD1     | 78   | 53  | 72  | 62   | 147  | 109 | 69  |    |
| FKH1xSTB1     | 197  | 398 | 379 | 192  | 340  | 245 | 343 |    |
| FKH1xSWI4     | 293  | 403 | 390 | 181  | 319  | 310 | 324 |    |
| FKH1xSWI6     | 204  | 369 | 372 | 189  | 290  | 274 | 302 |    |
| FKH2xHCM1     | 1055 | 676 | 727 | 650  | 1115 | 867 | 628 |    |
| FKH2xMBP1     | 289  | 463 | 427 | 155  | 402  | 332 | 319 |    |
| FKH2xMCM1     | 140  | 69  | 73  | 72   | 176  | 127 | 85  |    |
| FKH2xNDD1     | 126  | 57  | 83  | 63   | 178  | 126 | 67  |    |
| FKH2xSTB1     | 296  | 467 | 444 | 157  | 428  | 295 | 315 |    |
| FKH2xSWI4     | 418  | 469 | 452 | 174  | 398  | 367 | 297 |    |
| FKH2xSWI6     | 295  | 428 | 456 | 168  | 376  | 332 | 280 |    |
| FZF1xSPT23    | 470  | 377 | 366 | 360  | 348  | 298 | 427 |    |
| GAL4xGAL80    | 10   | 0   | 8   | 11   | 4    | 15  | 0   |    |
| GAL4xGIS1     | 16   | 10  | 12  | 17   | 17   | 48  | 3   |    |
| GAL4xMSN4     | 15   | 7   | 13  | 13   | 9    | 30  | 1   |    |
| GAL4xPDR1     | 7    | 3   | 6   | 2    | 12   | 15  | 4   |    |
| GAL4xRGM1     | 16   | 10  | 12  | 17   | 17   | 48  | 3   |    |
| GAL4xRSC3     | 4    | 1   | 14  | 6    | 8    | 17  | 5   |    |
| GAL4xSTP1     | 9    | 2   | 18  | 6    | 10   | 15  | 5   |    |
| GAL4xSUT1     | 4    | 2   | 15  | 1    | 11   | 16  | 6   |    |
| GAL4xYJL103C  | 13   | 5   | 0   | 7    | 15   | 32  | 4   |    |
| GAL4xYPL230W  | 16   | 10  | 12  | 17   | 17   | 48  | 3   |    |
| GAL80xGIS1    | 33   | 29  | 10  | 34   | 34   | 119 | 26  |    |
| GAL80xIME1    | 7    | 2   | 6   | 7    | 6    | 7   | 0   |    |
| GAL80xMIG3    | 46   | 13  | 10  | 17   | 30   | 58  | 15  |    |
| GAL80xPDR1    | 17   | 14  | 11  | 12   | 25   | 49  | 9   |    |
| GAL80xRSC3    | 5    | 19  | 22  | 13   | 15   | 57  | 8   |    |
| GAL80xSKN7    | 50   | 8   | 18  | 9    | 31   | 49  | 12  |    |
| GAL80xSTP1    | 16   | 19  | 28  | 20   | 18   | 51  | 18  |    |
| GAL80xSUT1    | 38   | 19  | 26  | 13   | 24   | 64  | 18  |    |
| GAL80xYER184C |      | 34  | 12  | 2    | 4    | 24  | 41  | 14 |
| GAL80xYJL103C | 44   | 17  | 1   | 29   | 31   | 81  | 11  |    |
| GAL80xYPL230W |      | 33  | 29  | 10   | 34   | 34  | 119 | 26 |
| GAT1xGLN3     | 562  | 574 | 659 | 656  | 496  | 582 | 461 |    |
| GAT1xGZF3     | 920  | 378 | 570 | 1064 | 763  | 657 | 471 |    |

|                 |      |     |     |      |     |      |     |
|-----------------|------|-----|-----|------|-----|------|-----|
| GAT1xSIP4       | 22   | 3   | 22  | 29   | 9   | 10   | 11  |
| GAT3xMCM1       | 62   | 60  | 75  | 91   | 89  | 144  | 80  |
| GAT3xRLM1       | 198  | 124 | 196 | 174  | 194 | 357  | 263 |
| GAT3xRSC30      | 44   | 24  | 10  | 19   | 15  | 69   | 23  |
| GAT4xGCR1       | 139  | 110 | 89  | 89   | 113 | 128  | 120 |
| GAT4xLYS14      | 276  | 343 | 347 | 138  | 296 | 256  | 327 |
| GAT4xMET32      | 164  | 279 | 200 | 146  | 247 | 197  | 237 |
| GAT4xMOT3       | 191  | 634 | 727 | 158  | 619 | 224  | 830 |
| GCN4xLEU3       | 37   | 37  | 41  | 37   | 55  | 44   | 33  |
| GCN4xRSC3       | 176  | 367 | 425 | 186  | 236 | 242  | 323 |
| GCN4xRTG3       | 216  | 367 | 395 | 200  | 245 | 285  | 322 |
| GCN4xSTB3       | 210  | 187 | 203 | 157  | 255 | 249  | 202 |
| GCN4xTBF1       | 217  | 411 | 329 | 181  | 242 | 262  | 244 |
| GCN4xTYE7       | 248  | 403 | 224 | 180  | 194 | 248  | 208 |
| GCR1xGCR2       | 273  | 228 | 130 | 196  | 271 | 155  | 227 |
| GCR1xLYS14      | 217  | 93  | 81  | 82   | 93  | 137  | 98  |
| GCR1xRAP1       | 72   | 22  | 18  | 48   | 69  | 72   | 32  |
| GCR1xSTB4       | 107  | 36  | 39  | 100  | 56  | 76   | 53  |
| GCR1xSTP2       | 35   | 10  | 18  | 47   | 13  | 53   | 27  |
| GCR2xRDR1       | 273  | 362 | 316 | 344  | 514 | 290  | 567 |
| GCR2xRFX1       | 2    | 0   | 11  | 5    | 1   | 4    | 7   |
| GCR2xSNF1       | 3    | 2   | 1   | 0    | 14  | 1    | 2   |
| GCR2xSTB4       | 263  | 289 | 244 | 276  | 407 | 205  | 329 |
| GCR2xTHI2       | 8    | 2   | 5   | 14   | 6   | 8    | 22  |
| GCR2xYBL054W480 | 876  | 632 | 230 | 941  | 373 | 762  |     |
| GIS1xMIG1       | 942  | 820 | 743 | 1148 | 820 | 1390 | 836 |
| GIS1xMIG2       | 49   | 10  | 15  | 69   | 23  | 54   | 44  |
| GIS1xMIG3       | 831  | 484 | 486 | 859  | 766 | 1030 | 909 |
| GIS1xMSN2       | 937  | 917 | 929 | 1219 | 906 | 1146 | 993 |
| GIS1xMSN4       | 1367 | 745 | 788 | 1854 | 906 | 1773 | 993 |
| GIS1xNHP10      | 238  | 153 | 86  | 248  | 153 | 311  | 225 |
| GIS1xNRG1       | 722  | 469 | 509 | 667  | 723 | 790  | 717 |
| GIS1xOAF1       | 337  | 200 | 164 | 439  | 308 | 379  | 256 |
| GIS1xOPI1       | 124  | 115 | 74  | 193  | 144 | 149  | 127 |
| GIS1xPDR1       | 677  | 703 | 605 | 647  | 691 | 903  | 658 |

|              |      |      |     |      |      |      |      |
|--------------|------|------|-----|------|------|------|------|
| GIS1xPHD1    | 646  | 745  | 623 | 636  | 695  | 1003 | 740  |
| GIS1xRDS1    | 451  | 184  | 209 | 580  | 326  | 753  | 337  |
| GIS1xRDS2    | 831  | 742  | 557 | 699  | 728  | 720  | 752  |
| GIS1xREB1    | 528  | 355  | 384 | 651  | 634  | 719  | 597  |
| GIS1xRPH1    | 626  | 389  | 292 | 770  | 390  | 969  | 536  |
| GIS1xRSC3    | 717  | 879  | 764 | 740  | 764  | 946  | 747  |
| GIS1xSKN7    | 648  | 756  | 675 | 763  | 817  | 1081 | 762  |
| GIS1xSOK2    | 1188 | 729  | 752 | 671  | 670  | 1479 | 958  |
| GIS1xSTP1    | 660  | 632  | 530 | 758  | 569  | 951  | 694  |
| GIS1xSUT1    | 830  | 824  | 790 | 840  | 818  | 1182 | 820  |
| GIS1xTBF1    | 538  | 541  | 557 | 610  | 629  | 645  | 623  |
| GIS1xUGA3    | 266  | 124  | 118 | 374  | 187  | 458  | 175  |
| GIS1xUME6    | 280  | 61   | 115 | 325  | 178  | 409  | 274  |
| GIS1xYDR026C | 469  | 290  | 216 | 561  | 440  | 617  | 376  |
| GIS1xYER130C | 214  | 74   | 74  | 242  | 129  | 264  | 154  |
| GIS1xYER184C | 926  | 688  | 729 | 792  | 857  | 1233 | 907  |
| GIS1xYJL103C | 1519 | 857  | 680 | 2136 | 1090 | 1963 | 1070 |
| GIS1xYLL054C | 80   | 55   | 39  | 113  | 71   | 232  | 72   |
| GIS1xZMS1    | 916  | 1050 | 903 | 1124 | 930  | 1425 | 1158 |
| GLN3xGZF3    | 567  | 328  | 491 | 657  | 496  | 582  | 461  |
| GSM1xMIG1    | 64   | 62   | 50  | 65   | 56   | 77   | 39   |
| GSM1xMIG3    | 57   | 32   | 35  | 41   | 51   | 67   | 42   |
| GSM1xRDS1    | 23   | 19   | 7   | 35   | 22   | 51   | 20   |
| GSM1xREB1    | 35   | 22   | 22  | 60   | 45   | 34   | 32   |
| GSM1xSUT1    | 49   | 44   | 55  | 36   | 48   | 72   | 45   |
| GSM1xYJL103C | 125  | 64   | 45  | 161  | 94   | 133  | 86   |
| GTS1xMET32   | 424  | 342  | 219 | 426  | 425  | 394  | 281  |
| GTS1xMET4    | 67   | 26   | 27  | 63   | 57   | 47   | 40   |
| HAC1xMBP1    | 195  | 466  | 445 | 212  | 302  | 358  | 390  |
| HAC1xMIG1    | 244  | 532  | 382 | 239  | 314  | 504  | 380  |
| HAC1xPHD1    | 191  | 502  | 481 | 184  | 277  | 369  | 382  |
| HAC1xPHO4    | 170  | 366  | 177 | 163  | 137  | 346  | 240  |
| HAC1xSUT1    | 202  | 494  | 423 | 159  | 273  | 396  | 402  |
| HAC1xSWI6    | 193  | 424  | 418 | 199  | 270  | 323  | 337  |
| HAC1xTYE7    | 193  | 535  | 249 | 152  | 206  | 314  | 262  |

|               |     |     |     |     |     |     |     |
|---------------|-----|-----|-----|-----|-----|-----|-----|
| HAC1xYLL054C  | 16  | 32  | 15  | 17  | 36  | 99  | 43  |
| HAP1xMIG1     | 97  | 73  | 72  | 135 | 50  | 168 | 75  |
| HAP1xMIG3     | 61  | 45  | 49  | 66  | 53  | 117 | 85  |
| HAP1xNHP10    | 23  | 4   | 12  | 35  | 10  | 40  | 27  |
| HAP1xPDR1     | 67  | 82  | 54  | 90  | 41  | 95  | 71  |
| HAP1xPDR3     | 21  | 2   | 9   | 22  | 11  | 34  | 16  |
| HAP1xPHO4     | 70  | 74  | 38  | 90  | 20  | 107 | 45  |
| HAP1xRDS1     | 41  | 15  | 23  | 86  | 16  | 108 | 53  |
| HAP1xREB1     | 63  | 42  | 45  | 73  | 41  | 81  | 81  |
| HAP1xRSC3     | 70  | 105 | 58  | 82  | 62  | 142 | 92  |
| HAP1xSFP1     | 48  | 78  | 74  | 81  | 34  | 73  | 56  |
| HAP1xSKN7     | 56  | 85  | 91  | 96  | 57  | 141 | 91  |
| HAP1xSOK2     | 148 | 83  | 84  | 79  | 31  | 169 | 107 |
| HAP1xSUT1     | 61  | 98  | 79  | 66  | 44  | 150 | 92  |
| HAP1xTOS8     | 4   | 2   | 1   | 6   | 3   | 3   | 2   |
| HAP1xUGA3     | 33  | 18  | 17  | 52  | 6   | 68  | 29  |
| HAP1xYER184C  | 82  | 100 | 82  | 75  | 70  | 135 | 130 |
| HAP1xYJL103C  | 140 | 137 | 84  | 210 | 80  | 203 | 151 |
| HAP1xZMS1     | 74  | 86  | 94  | 102 | 61  | 156 | 112 |
| HAP2xRDS1     | 110 | 98  | 148 | 146 | 85  | 211 | 141 |
| HAP2xRSC3     | 190 | 312 | 412 | 143 | 322 | 205 | 335 |
| HAP2xSUT1     | 213 | 297 | 413 | 168 | 284 | 254 | 319 |
| HAP2xYLL054C  | 20  | 23  | 20  | 29  | 17  | 42  | 32  |
| HAP3xHAP4     | 12  | 5   | 3   | 12  | 3   | 6   | 8   |
| HAP3xMBP1     | 2   | 9   | 6   | 4   | 9   | 4   | 9   |
| HAP3xMIG3     | 9   | 1   | 8   | 7   | 12  | 19  | 10  |
| HAP3xPDR8     | 9   | 1   | 5   | 6   | 9   | 10  | 8   |
| HAP3xRDS1     | 4   | 6   | 4   | 5   | 2   | 19  | 3   |
| HAP3xRSC3     | 15  | 18  | 12  | 12  | 31  | 15  | 13  |
| HAP3xSKN7     | 8   | 7   | 10  | 8   | 22  | 24  | 10  |
| HAP3xSUT1     | 14  | 3   | 16  | 8   | 16  | 26  | 9   |
| HAP3xSWI6     | 4   | 7   | 9   | 1   | 12  | 6   | 8   |
| HAP3xUGA3     | 2   | 0   | 4   | 5   | 6   | 5   | 5   |
| HAP3xYAP3     | 7   | 0   | 1   | 5   | 12  | 8   | 4   |
| HAP3xYBL054W9 |     | 8   | 7   | 4   | 10  | 17  | 10  |



|                 |      |      |      |      |      |      |      |  |
|-----------------|------|------|------|------|------|------|------|--|
| HAP3xZMS1       | 10   | 3    | 9    | 9    | 13   | 29   | 12   |  |
| HAP4xHAP5       | 14   | 0    | 3    | 16   | 5    | 19   | 9    |  |
| HAP4xRDS1       | 73   | 36   | 40   | 97   | 49   | 110  | 56   |  |
| HAP4xRSC3       | 115  | 127  | 179  | 139  | 186  | 136  | 125  |  |
| HAP4xSKN7       | 125  | 129  | 149  | 128  | 149  | 162  | 120  |  |
| HAP4xSUT1       | 149  | 127  | 167  | 116  | 151  | 137  | 123  |  |
| HAP4xYLL054C    | 19   | 12   | 8    | 20   | 8    | 27   | 7    |  |
| HAP5xNHP10      | 5    | 0    | 3    | 6    | 2    | 5    | 4    |  |
| HAP5xPHD1       | 11   | 13   | 11   | 13   | 12   | 18   | 10   |  |
| HAP5xRDS1       | 15   | 4    | 9    | 18   | 0    | 24   | 10   |  |
| HAP5xRSC3       | 17   | 9    | 14   | 17   | 18   | 14   | 15   |  |
| HAP5xSKN7       | 22   | 10   | 17   | 24   | 9    | 34   | 13   |  |
| HAP5xSTP2       | 3    | 1    | 5    | 5    | 2    | 5    | 5    |  |
| HAP5xSUT1       | 19   | 11   | 24   | 19   | 9    | 25   | 12   |  |
| HAP5xUGA3       | 4    | 0    | 5    | 4    | 5    | 8    | 6    |  |
| HAP5xYAP3       | 8    | 2    | 2    | 13   | 10   | 15   | 5    |  |
| HAP5xYBL054W6   |      | 19   | 7    | 7    | 14   | 17   | 7    |  |
| HAP5xYDR026C    | 12   | 5    | 1    | 12   | 8    | 14   | 6    |  |
| HCM1xMCM1       | 301  | 80   | 111  | 263  | 318  | 235  | 159  |  |
| HCM1xNDD1       | 270  | 67   | 130  | 237  | 314  | 224  | 122  |  |
| HMRA2xMATALPHA2 | 1274 | 1385 | 1148 | 1330 | 1641 | 1628 | 1310 |  |
| HMRA2xMCM1      | 106  | 45   | 100  | 115  | 157  | 106  | 86   |  |
| HMRA2xNHP6A     | 192  | 418  | 402  | 214  | 393  | 331  | 381  |  |
| HMRA2xNHP6B     | 203  | 427  | 370  | 183  | 379  | 312  | 469  |  |
| HMRA2xSPT15     | 203  | 457  | 427  | 179  | 394  | 321  | 339  |  |
| HMS1xMIG1       | 212  | 231  | 165  | 266  | 244  | 411  | 225  |  |
| HMS1xMIG3       | 182  | 119  | 115  | 199  | 225  | 319  | 249  |  |
| HMS1xNHP10      | 52   | 37   | 33   | 54   | 54   | 83   | 67   |  |
| HMS1xRSC3       | 152  | 203  | 187  | 151  | 173  | 253  | 204  |  |
| HMS1xSOK2       | 318  | 179  | 179  | 191  | 159  | 425  | 242  |  |
| HMS1xSUT1       | 182  | 241  | 174  | 188  | 219  | 307  | 195  |  |
| HMS1xTYE7       | 144  | 161  | 78   | 148  | 97   | 252  | 148  |  |
| HMS1xYOX1       | 45   | 15   | 22   | 47   | 21   | 37   | 30   |  |
| HMS1xZMS1       | 194  | 296  | 214  | 246  | 252  | 419  | 286  |  |
| HSF1xBBP1       | 287  | 42   | 33   | 143  | 57   | 58   | 35   |  |

|                |     |     |     |     |      |     |     |     |
|----------------|-----|-----|-----|-----|------|-----|-----|-----|
| HSF1xYRR1      | 5   | 0   | 0   | 6   | 3    | 1   | 7   |     |
| IME1xMCM1      | 37  | 4   | 10  | 23  | 28   | 29  | 21  |     |
| IME1xNDD1      | 34  | 7   | 7   | 21  | 14   | 29  | 16  |     |
| IME1xPDR1      | 82  | 54  | 74  | 76  | 116  | 126 | 96  |     |
| IME1xPDR3      | 37  | 2   | 9   | 24  | 23   | 33  | 17  |     |
| IME1xRDS1      | 47  | 19  | 46  | 71  | 99   | 77  | 43  |     |
| IME1xRPN4      | 34  | 13  | 25  | 50  | 29   | 73  | 34  |     |
| IME1xRSC30     | 10  | 10  | 6   | 9   | 6    | 30  | 6   |     |
| IME1xRSC3      | 82  | 70  | 84  | 64  | 47   | 161 | 109 |     |
| IME1xSKN7      | 59  | 61  | 62  | 72  | 68   | 115 | 66  |     |
| IME1xSTB2      | 58  | 34  | 62  | 66  | 60   | 77  | 84  |     |
| IME1xSTP1      | 81  | 46  | 53  | 77  | 44   | 160 | 63  |     |
| IME1xSUT1      | 77  | 51  | 71  | 80  | 56   | 143 | 103 |     |
| IME1xUGA3      | 30  | 7   | 11  | 33  | 20   | 49  | 16  |     |
| IME1xUME6      | 37  | 2   | 9   | 57  | 6    | 65  | 43  |     |
| IME1xYLL054C   | 5   | 4   | 4   | 17  | 12   | 43  | 3   |     |
| IME1xYPR196W72 |     | 39  | 51  | 63  | 66   | 71  | 69  |     |
| INO2xINO4      | 126 | 105 | 59  | 153 | 106  | 148 | 111 |     |
| INO2xMATALPHA2 |     | 833 | 701 | 456 | 1052 | 535 | 776 | 692 |
| INO2xOAF1      | 72  | 101 | 38  | 102 | 77   | 95  | 70  |     |
| INO2xPDR3      | 44  | 14  | 22  | 52  | 25   | 55  | 24  |     |
| INO2xPHD1      | 181 | 255 | 168 | 115 | 202  | 247 | 221 |     |
| INO2xPHO4      | 166 | 221 | 89  | 186 | 139  | 234 | 162 |     |
| INO2xRAP1      | 104 | 46  | 45  | 66  | 69   | 73  | 51  |     |
| INO2xRCS1      | 191 | 265 | 185 | 160 | 142  | 229 | 175 |     |
| INO2xRDS1      | 141 | 61  | 50  | 153 | 100  | 173 | 127 |     |
| INO2xREB1      | 165 | 129 | 113 | 162 | 156  | 190 | 163 |     |
| INO2xSTB2      | 171 | 205 | 168 | 173 | 154  | 170 | 170 |     |
| INO2xSTB4      | 107 | 115 | 68  | 170 | 75   | 130 | 113 |     |
| INO2xTYE7      | 183 | 341 | 110 | 241 | 177  | 278 | 161 |     |
| INO2xYAP7      | 170 | 69  | 85  | 192 | 63   | 90  | 91  |     |
| INO2xYDR026C   | 136 | 118 | 81  | 158 | 134  | 160 | 109 |     |
| INO2xYLL054C   | 16  | 12  | 3   | 25  | 40   | 66  | 31  |     |
| INO4xPHO4      | 118 | 131 | 62  | 154 | 83   | 138 | 122 |     |
| INO4xRAP1      | 61  | 22  | 33  | 64  | 42   | 55  | 42  |     |

|                |     |     |     |     |     |     |     |
|----------------|-----|-----|-----|-----|-----|-----|-----|
| INO4xREB1      | 108 | 79  | 72  | 122 | 98  | 121 | 116 |
| INO4xSTB2      | 111 | 119 | 106 | 136 | 93  | 121 | 134 |
| INO4xTYE7      | 131 | 206 | 84  | 168 | 108 | 178 | 101 |
| INO4xBBP1      | 137 | 166 | 138 | 197 | 115 | 152 | 167 |
| INO4xYAP7      | 127 | 48  | 70  | 147 | 45  | 72  | 82  |
| INO4xYDR026C   | 88  | 69  | 52  | 109 | 89  | 106 | 77  |
| INO4xYLL054C   | 7   | 10  | 2   | 17  | 22  | 52  | 25  |
| LEU3xMIG3      | 31  | 16  | 8   | 40  | 19  | 62  | 40  |
| LEU3xRSC3      | 17  | 47  | 23  | 24  | 22  | 128 | 47  |
| LEU3xSKN7      | 33  | 14  | 13  | 40  | 24  | 72  | 52  |
| LEU3xSTB1      | 19  | 28  | 12  | 26  | 7   | 61  | 40  |
| LEU3xSTP2      | 16  | 9   | 6   | 14  | 4   | 39  | 14  |
| LEU3xSUT1      | 39  | 28  | 18  | 44  | 18  | 75  | 41  |
| LEU3xSUT2      | 6   | 6   | 5   | 8   | 8   | 4   | 6   |
| LEU3xSWI4      | 31  | 25  | 13  | 18  | 7   | 64  | 33  |
| LEU3xTYE7      | 10  | 31  | 10  | 28  | 7   | 54  | 28  |
| LEU3xUME6      | 14  | 0   | 3   | 19  | 9   | 19  | 13  |
| LEU3xYJL103C   | 56  | 43  | 17  | 85  | 39  | 116 | 66  |
| LYS14xMCM1     | 82  | 48  | 65  | 81  | 131 | 116 | 66  |
| LYS14xMIG1     | 296 | 369 | 388 | 278 | 299 | 415 | 329 |
| LYS14xNHP10    | 73  | 55  | 50  | 51  | 69  | 91  | 85  |
| LYS14xNRG1     | 208 | 240 | 284 | 169 | 245 | 275 | 301 |
| LYS14xPDR3     | 62  | 42  | 42  | 54  | 58  | 75  | 70  |
| LYS14xPDR8     | 211 | 233 | 260 | 191 | 323 | 381 | 287 |
| LYS14xSKN7     | 214 | 351 | 341 | 144 | 297 | 311 | 274 |
| LYS14xSTB4     | 242 | 164 | 134 | 134 | 138 | 229 | 162 |
| LYS14xSTB5     | 328 | 326 | 356 | 144 | 262 | 266 | 277 |
| LYS14xSTE12    | 312 | 366 | 365 | 149 | 230 | 268 | 287 |
| LYS14xSUT1     | 219 | 379 | 386 | 154 | 272 | 281 | 298 |
| LYS14xSUT2     | 80  | 45  | 59  | 63  | 72  | 77  | 70  |
| LYS14xYJL103C  | 575 | 443 | 390 | 489 | 485 | 686 | 533 |
| LYS14xYLL054C  | 21  | 26  | 8   | 11  | 24  | 44  | 38  |
| LYS14xYRM1     | 215 | 343 | 370 | 206 | 311 | 412 | 351 |
| MATA1xRLM1     | 242 | 47  | 131 | 119 | 185 | 209 | 133 |
| MATALPHA2xMCM1 | 408 | 154 | 210 | 506 | 398 | 382 | 287 |

|                 |     |      |      |     |      |      |      |
|-----------------|-----|------|------|-----|------|------|------|
| MATALPHA2xNHP6A | 889 | 1126 | 995  | 939 | 936  | 997  | 1064 |
| MATALPHA2xNHP6B | 848 | 1105 | 1136 | 986 | 909  | 982  | 1287 |
| MATALPHA2xSPT15 | 952 | 1285 | 1033 | 956 | 844  | 1067 | 997  |
| MATALPHA2xSTE12 | 988 | 1281 | 1104 | 976 | 1041 | 1042 | 1119 |
| MATALPHA2xTYE7  | 826 | 1175 | 537  | 977 | 714  | 909  | 730  |
| MBP1xMCM1       | 161 | 75   | 84   | 124 | 211  | 151  | 106  |
| MBP1xMET28      | 175 | 366  | 290  | 162 | 224  | 214  | 314  |
| MBP1xNDD1       | 98  | 66   | 80   | 113 | 198  | 155  | 99   |
| MBP1xNDT80      | 13  | 15   | 12   | 12  | 7    | 14   | 15   |
| MBP1xPHD1       | 161 | 494  | 442  | 170 | 274  | 263  | 309  |
| MBP1xRDS1       | 103 | 105  | 107  | 121 | 95   | 232  | 159  |
| MBP1xRDS2       | 233 | 466  | 436  | 203 | 291  | 231  | 348  |
| MBP1xREB1       | 173 | 175  | 219  | 200 | 217  | 244  | 282  |
| MBP1xRSC3       | 172 | 609  | 464  | 207 | 275  | 323  | 495  |
| MBP1xRTG3       | 162 | 383  | 387  | 162 | 199  | 267  | 279  |
| MBP1xSTB1       | 266 | 594  | 440  | 221 | 402  | 367  | 489  |
| MBP1xSTB2       | 205 | 330  | 356  | 229 | 302  | 268  | 380  |
| MBP1xSTB3       | 159 | 174  | 161  | 164 | 206  | 167  | 157  |
| MBP1xSTP1       | 185 | 398  | 331  | 185 | 250  | 309  | 340  |
| MBP1xSTP2       | 56  | 60   | 52   | 78  | 38   | 130  | 109  |
| MBP1xSUM1       | 77  | 61   | 61   | 102 | 115  | 89   | 71   |
| MBP1xSUT1       | 221 | 475  | 526  | 171 | 276  | 347  | 402  |
| MBP1xSWI4       | 340 | 573  | 461  | 238 | 379  | 407  | 442  |
| MBP1xSWI6       | 327 | 545  | 576  | 331 | 500  | 416  | 459  |
| MBP1xTYE7       | 209 | 483  | 161  | 182 | 223  | 322  | 264  |
| MBP1xUME6       | 90  | 39   | 69   | 123 | 84   | 153  | 129  |
| MBP1xYDR026C    | 144 | 186  | 119  | 167 | 152  | 223  | 152  |
| MCM1xMSN2       | 129 | 73   | 81   | 125 | 209  | 111  | 78   |
| MCM1xNDD1       | 98  | 7    | 22   | 69  | 156  | 93   | 28   |
| MCM1xNHP10      | 29  | 10   | 22   | 36  | 34   | 29   | 15   |
| MCM1xPDR1       | 86  | 46   | 68   | 53  | 134  | 71   | 68   |
| MCM1xPHD1       | 102 | 46   | 99   | 96  | 129  | 118  | 77   |
| MCM1xRDS2       | 110 | 62   | 67   | 94  | 112  | 73   | 87   |
| MCM1xRSC3       | 98  | 60   | 77   | 71  | 151  | 113  | 82   |
| MCM1xSIP4       | 4   | 0    | 0    | 3   | 3    | 10   | 4    |

|               |     |     |     |     |     |     |     |    |
|---------------|-----|-----|-----|-----|-----|-----|-----|----|
| MCM1xSTB1     | 143 | 71  | 93  | 102 | 174 | 99  | 88  |    |
| MCM1xSTE12    | 90  | 63  | 96  | 78  | 128 | 97  | 102 |    |
| MCM1xSTP1     | 91  | 50  | 57  | 80  | 129 | 99  | 65  |    |
| MCM1xSTP2     | 28  | 1   | 5   | 40  | 29  | 24  | 20  |    |
| MCM1xSUT1     | 104 | 57  | 88  | 87  | 192 | 109 | 63  |    |
| MCM1xSWI4     | 171 | 70  | 100 | 109 | 166 | 108 | 76  |    |
| MCM1xSWI6     | 148 | 61  | 99  | 107 | 195 | 114 | 86  |    |
| MCM1xUGA3     | 66  | 18  | 18  | 40  | 39  | 70  | 15  |    |
| MCM1xUME6     | 29  | 6   | 6   | 26  | 47  | 35  | 21  |    |
| MCM1xXBP1     | 154 | 64  | 91  | 132 | 231 | 134 | 93  |    |
| MCM1xYLL054C  |     | 5   | 0   | 3   | 9   | 15  | 34  | 5  |
| MCM1xYOX1     | 33  | 10  | 19  | 24  | 35  | 14  | 8   |    |
| MCM1xYPR196W  |     | 85  | 45  | 56  | 75  | 142 | 79  | 66 |
| MET28xPHO4    | 152 | 265 | 123 | 141 | 116 | 240 | 167 |    |
| MET28xRSC3    | 179 | 396 | 334 | 148 | 281 | 247 | 345 |    |
| MET28xSTB1    | 197 | 360 | 262 | 144 | 205 | 230 | 344 |    |
| MET28xSTB5    | 250 | 290 | 312 | 142 | 219 | 202 | 317 |    |
| MET28xSUM1    | 67  | 74  | 75  | 68  | 98  | 105 | 93  |    |
| MET28xSUT1    | 176 | 386 | 330 | 169 | 257 | 299 | 304 |    |
| MET28xSWI4    | 256 | 356 | 253 | 170 | 186 | 256 | 313 |    |
| MET28xSWI6    | 184 | 322 | 288 | 183 | 214 | 244 | 315 |    |
| MET28xTYE7    | 186 | 386 | 225 | 134 | 165 | 262 | 216 |    |
| MET28xYNR063W |     | 4   | 0   | 2   | 6   | 6   | 4   | 4  |
| MET31xMIG1    | 254 | 459 | 336 | 274 | 341 | 468 | 351 |    |
| MET31xMIG3    | 219 | 262 | 225 | 165 | 326 | 320 | 404 |    |
| MET31xMSN4    | 372 | 357 | 332 | 350 | 344 | 479 | 438 |    |
| MET31xPDR1    | 182 | 394 | 370 | 155 | 260 | 279 | 378 |    |
| MET31xPHO4    | 173 | 313 | 121 | 160 | 126 | 261 | 192 |    |
| MET31xRDS1    | 125 | 111 | 105 | 132 | 113 | 260 | 203 |    |
| MET31xRPN4    | 122 | 148 | 84  | 136 | 118 | 159 | 138 |    |
| MET31xRSC3    | 209 | 424 | 310 | 171 | 272 | 343 | 394 |    |
| MET31xSKN7    | 222 | 415 | 330 | 191 | 314 | 318 | 363 |    |
| MET31xSTP3    | 271 | 369 | 380 | 306 | 286 | 307 | 298 |    |
| MET31xTYE7    | 173 | 387 | 173 | 147 | 204 | 281 | 246 |    |
| MET32xMET4    | 45  | 21  | 23  | 61  | 69  | 46  | 34  |    |

|            |     |     |     |      |     |      |     |
|------------|-----|-----|-----|------|-----|------|-----|
| MET32xPHO4 | 211 | 225 | 89  | 188  | 158 | 237  | 178 |
| MET32xTYE7 | 244 | 302 | 152 | 215  | 262 | 283  | 212 |
| MET4xRDS1  | 28  | 19  | 12  | 28   | 21  | 57   | 12  |
| MET4xRSC3  | 35  | 50  | 27  | 8    | 35  | 59   | 27  |
| MET4xSKN7  | 37  | 41  | 35  | 34   | 86  | 67   | 26  |
| MET4xSTB2  | 16  | 15  | 31  | 19   | 27  | 40   | 27  |
| MET4xTYE7  | 59  | 43  | 31  | 55   | 45  | 65   | 20  |
| MIG1xMIG3  | 385 | 344 | 397 | 350  | 442 | 498  | 440 |
| MIG1xMSN2  | 349 | 675 | 580 | 434  | 472 | 487  | 496 |
| MIG1xMSN4  | 538 | 588 | 547 | 662  | 472 | 800  | 496 |
| MIG1xNHP10 | 93  | 98  | 63  | 103  | 103 | 164  | 104 |
| MIG1xNRG1  | 327 | 413 | 313 | 239  | 332 | 424  | 346 |
| MIG1xOAF1  | 192 | 194 | 125 | 191  | 144 | 213  | 146 |
| MIG1xOPI1  | 59  | 83  | 49  | 82   | 65  | 68   | 47  |
| MIG1xPDR1  | 332 | 507 | 401 | 276  | 344 | 461  | 371 |
| MIG1xPDR3  | 94  | 32  | 55  | 80   | 83  | 98   | 72  |
| MIG1xPDR8  | 268 | 366 | 305 | 283  | 319 | 464  | 351 |
| MIG1xPHD1  | 281 | 545 | 440 | 312  | 360 | 494  | 399 |
| MIG1xPHO4  | 218 | 335 | 183 | 258  | 150 | 462  | 219 |
| MIG1xRCS1  | 334 | 563 | 414 | 316  | 355 | 531  | 337 |
| MIG1xRDS1  | 182 | 182 | 147 | 264  | 167 | 406  | 161 |
| MIG1xRDS2  | 431 | 622 | 422 | 276  | 344 | 426  | 384 |
| MIG1xREB1  | 198 | 207 | 258 | 220  | 266 | 374  | 256 |
| MIG1xRGM1  | 942 | 820 | 743 | 1148 | 820 | 1390 | 836 |
| MIG1xRGT1  | 325 | 533 | 502 | 314  | 335 | 432  | 383 |
| MIG1xRPH1  | 231 | 238 | 199 | 294  | 200 | 527  | 242 |
| MIG1xRSC30 | 45  | 30  | 23  | 39   | 19  | 162  | 24  |
| MIG1xRSC3  | 252 | 579 | 493 | 290  | 333 | 665  | 437 |
| MIG1xSFP1  | 229 | 435 | 393 | 206  | 335 | 373  | 299 |
| MIG1xSIP4  | 26  | 9   | 7   | 20   | 11  | 19   | 11  |
| MIG1xSKN7  | 308 | 557 | 452 | 297  | 415 | 595  | 405 |
| MIG1xSOK2  | 516 | 535 | 486 | 364  | 288 | 701  | 449 |
| MIG1xSTB2  | 191 | 413 | 370 | 245  | 264 | 347  | 317 |
| MIG1xSTB5  | 205 | 485 | 414 | 261  | 323 | 366  | 281 |
| MIG1xSTP1  | 277 | 559 | 367 | 327  | 288 | 524  | 381 |

|                  |     |     |      |     |      |      |     |
|------------------|-----|-----|------|-----|------|------|-----|
| MIG1xSTP2        | 101 | 104 | 77   | 122 | 46   | 196  | 122 |
| MIG1xSUT1        | 356 | 640 | 567  | 326 | 432  | 583  | 413 |
| MIG1xSUT2        | 103 | 104 | 86   | 113 | 114  | 99   | 71  |
| MIG1xUGA3        | 139 | 98  | 82   | 152 | 93   | 237  | 91  |
| MIG1xUME6        | 156 | 31  | 71   | 169 | 75   | 249  | 152 |
| MIG1xYBL054W301  | 579 | 384 | 270  | 375 | 468  | 379  |     |
| MIG1xYDR026C 180 | 180 | 156 | 223  | 207 | 340  | 163  |     |
| MIG1xYER184C 510 | 535 | 539 | 367  | 464 | 635  | 521  |     |
| MIG1xYJL103C 774 | 709 | 520 | 978  | 584 | 1014 | 629  |     |
| MIG1xYLL054C 51  | 47  | 24  | 56   | 24  | 148  | 55   |     |
| MIG1xYPL230W942  | 820 | 743 | 1148 | 820 | 1390 | 836  |     |
| MIG1xYRM1        | 219 | 473 | 488  | 310 | 328  | 561  | 429 |
| MIG1xZMS1        | 403 | 792 | 652  | 450 | 506  | 664  | 542 |
| MIG2xMOT3        | 17  | 10  | 45   | 21  | 14   | 7    | 45  |
| MIG2xOAF1        | 11  | 2   | 6    | 15  | 4    | 8    | 11  |
| MIG2xRGM1        | 49  | 10  | 15   | 69  | 23   | 54   | 44  |
| MIG2xSOK2        | 33  | 9   | 29   | 26  | 4    | 27   | 21  |
| MIG2xSTP2        | 2   | 5   | 0    | 9   | 1    | 7    | 9   |
| MIG2xSUT1        | 13  | 7   | 18   | 32  | 14   | 10   | 22  |
| MIG2xSUT2        | 5   | 1   | 2    | 6   | 6    | 7    | 2   |
| MIG2xYAP7        | 3   | 3   | 3    | 8   | 5    | 12   | 6   |
| MIG2xYJL103C 25  | 11  | 9   | 30   | 33  | 37   | 22   |     |
| MIG2xYPL230W49   | 10  | 15  | 69   | 23  | 54   | 44   |     |
| MIG3xMSN2        | 329 | 399 | 379  | 337 | 436  | 380  | 552 |
| MIG3xMSN4        | 506 | 342 | 362  | 517 | 436  | 622  | 552 |
| MIG3xNRG1        | 259 | 221 | 195  | 177 | 299  | 282  | 367 |
| MIG3xOAF1        | 139 | 118 | 86   | 134 | 152  | 157  | 148 |
| MIG3xOPI1        | 50  | 46  | 36   | 52  | 48   | 37   | 66  |
| MIG3xPDR1        | 253 | 280 | 267  | 218 | 338  | 326  | 368 |
| MIG3xPDR8        | 215 | 209 | 189  | 227 | 329  | 355  | 347 |
| MIG3xPHD1        | 213 | 292 | 273  | 215 | 357  | 339  | 423 |
| MIG3xRDS1        | 152 | 123 | 102  | 179 | 145  | 283  | 199 |
| MIG3xRDS2        | 344 | 368 | 278  | 172 | 348  | 249  | 363 |
| MIG3xREB1        | 171 | 139 | 152  | 164 | 236  | 207  | 240 |
| MIG3xRGM1        | 831 | 484 | 486  | 859 | 766  | 1030 | 909 |

|              |     |     |     |      |     |      |     |     |
|--------------|-----|-----|-----|------|-----|------|-----|-----|
| MIG3xRGT1    | 290 | 304 | 322 | 253  | 316 | 300  | 381 |     |
| MIG3xRPH1    | 220 | 134 | 140 | 218  | 175 | 392  | 254 |     |
| MIG3xRPN4    | 108 | 96  | 99  | 151  | 115 | 184  | 145 |     |
| MIG3xRSC3    | 209 | 348 | 339 | 212  | 344 | 403  | 427 |     |
| MIG3xSKN7    | 259 | 329 | 270 | 198  | 372 | 423  | 404 |     |
| MIG3xSOK2    | 430 | 282 | 311 | 252  | 265 | 526  | 465 |     |
| MIG3xSTB2    | 157 | 249 | 216 | 148  | 260 | 201  | 273 |     |
| MIG3xSTB5    | 159 | 268 | 296 | 152  | 340 | 227  | 284 |     |
| MIG3xSTP1    | 249 | 321 | 238 | 234  | 271 | 390  | 391 |     |
| MIG3xSTP2    | 90  | 68  | 48  | 102  | 41  | 132  | 128 |     |
| MIG3xSTP3    | 273 | 276 | 255 | 281  | 300 | 334  | 259 |     |
| MIG3xSUT1    | 349 | 361 | 380 | 233  | 413 | 417  | 432 |     |
| MIG3xSUT2    | 76  | 72  | 63  | 69   | 122 | 67   | 63  |     |
| MIG3xUGA3    | 116 | 47  | 50  | 100  | 104 | 172  | 102 |     |
| MIG3xUME6    | 125 | 22  | 54  | 121  | 69  | 193  | 156 |     |
| MIG3xYDR026C | 128 | 106 | 95  | 134  | 185 | 219  | 163 |     |
| MIG3xYDR520C | 20  | 12  | 15  | 24   | 31  | 34   | 31  |     |
| MIG3xYER130C | 71  | 39  | 46  | 62   | 82  | 82   | 65  |     |
| MIG3xYER184C | 430 | 293 | 343 | 241  | 396 | 441  | 507 |     |
| MIG3xYJL103C | 637 | 383 | 330 | 670  | 540 | 672  | 622 |     |
| MIG3xYLL054C | 37  | 27  | 17  | 36   | 33  | 112  | 54  |     |
| MIG3xYPL230W | 831 | 484 | 486 | 859  | 766 | 1030 | 909 |     |
| MIG3xYPR196W |     | 232 | 283 | 315  | 217 | 315  | 298 | 354 |
| MIG3xYRM1    | 204 | 269 | 314 | 213  | 316 | 386  | 423 |     |
| MIG3xZMS1    | 354 | 431 | 438 | 333  | 510 | 478  | 639 |     |
| MOT3xSKN7    | 237 | 663 | 726 | 238  | 631 | 355  | 790 |     |
| MOT3xUSV1    | 7   | 8   | 27  | 14   | 16  | 11   | 30  |     |
| MSN2xMSN4    | 551 | 636 | 660 | 771  | 514 | 668  | 604 |     |
| MSN2xNDD1    | 122 | 63  | 90  | 152  | 196 | 130  | 71  |     |
| MSN2xPHD1    | 272 | 602 | 485 | 248  | 391 | 351  | 436 |     |
| MSN2xPHO4    | 251 | 392 | 188 | 266  | 218 | 281  | 251 |     |
| MSN2xREB1    | 228 | 277 | 288 | 282  | 341 | 264  | 320 |     |
| MSN2xRGM1    | 937 | 917 | 929 | 1219 | 906 | 1146 | 993 |     |
| MSN2xRPH1    | 224 | 311 | 232 | 284  | 210 | 318  | 315 |     |
| MSN2xRSC3    | 244 | 713 | 622 | 266  | 448 | 315  | 471 |     |



|                 |      |      |     |      |      |      |      |     |
|-----------------|------|------|-----|------|------|------|------|-----|
| MSN2xSKN7       | 263  | 597  | 515 | 293  | 428  | 373  | 463  |     |
| MSN2xSOK2       | 460  | 588  | 573 | 246  | 392  | 538  | 537  |     |
| MSN2xSUT1       | 320  | 672  | 618 | 287  | 483  | 403  | 471  |     |
| MSN2xYDR026C    |      | 184  | 240 | 167  | 233  | 247  | 226  | 201 |
| MSN2xYER184C383 |      | 539  | 570 | 299  | 482  | 455  | 494  |     |
| MSN2xYJL103C    | 629  | 650  | 513 | 816  | 597  | 735  | 585  |     |
| MSN2xYPL230W    |      | 937  | 917 | 929  | 1219 | 906  | 1146 | 993 |
| MSN2xZMS1       | 359  | 876  | 733 | 426  | 515  | 514  | 683  |     |
| MSN4xNDD1       | 154  | 63   | 78  | 203  | 196  | 174  | 71   |     |
| MSN4xNRG1       | 407  | 319  | 360 | 367  | 360  | 426  | 420  |     |
| MSN4xPHD1       | 387  | 499  | 438 | 362  | 391  | 568  | 436  |     |
| MSN4xRDS1       | 265  | 128  | 142 | 327  | 183  | 410  | 188  |     |
| MSN4xREB1       | 294  | 222  | 258 | 377  | 341  | 384  | 320  |     |
| MSN4xRGM1       | 1367 | 745  | 788 | 1854 | 906  | 1773 | 993  |     |
| MSN4xRPH1       | 349  | 241  | 204 | 425  | 210  | 537  | 315  |     |
| MSN4xRSC3       | 359  | 554  | 532 | 433  | 448  | 538  | 471  |     |
| MSN4xSKN7       | 389  | 491  | 471 | 441  | 428  | 607  | 463  |     |
| MSN4xSTP1       | 395  | 465  | 362 | 405  | 325  | 542  | 420  |     |
| MSN4xSUT1       | 499  | 566  | 551 | 468  | 483  | 685  | 471  |     |
| MSN4xUGA3       | 156  | 90   | 89  | 214  | 108  | 276  | 116  |     |
| MSN4xBP1        | 393  | 407  | 386 | 465  | 483  | 447  | 339  |     |
| MSN4xYDR026C    |      | 265  | 196 | 153  | 355  | 247  | 348  | 201 |
| MSN4xYER184C549 |      | 471  | 528 | 436  | 482  | 689  | 494  |     |
| MSN4xYJL103C    | 883  | 588  | 496 | 1187 | 597  | 1102 | 585  |     |
| MSN4xYLL054C    | 46   | 34   | 21  | 62   | 49   | 117  | 38   |     |
| MSN4xYPL230W    |      | 1367 | 745 | 788  | 1854 | 906  | 1773 | 993 |
| MSN4xZMS1       | 521  | 721  | 651 | 673  | 515  | 834  | 683  |     |
| NDD1xRDR1       | 99   | 30   | 42  | 91   | 67   | 102  | 72   |     |
| NDD1xRDS2       | 102  | 66   | 69  | 89   | 137  | 70   | 77   |     |
| NDD1xRSC30      | 18   | 6    | 6   | 9    | 6    | 23   | 10   |     |
| NDD1xRSC3       | 102  | 58   | 81  | 80   | 182  | 118  | 109  |     |
| NDD1xSTB1       | 135  | 61   | 86  | 100  | 177  | 117  | 103  |     |
| NDD1xSTP1       | 75   | 67   | 65  | 59   | 116  | 99   | 90   |     |
| NDD1xSTP2       | 23   | 8    | 14  | 30   | 29   | 35   | 23   |     |
| NDD1xSUT1       | 106  | 45   | 87  | 92   | 152  | 134  | 77   |     |

|                  |     |     |     |     |     |     |     |     |
|------------------|-----|-----|-----|-----|-----|-----|-----|-----|
| NDD1xSWI4        | 135 | 59  | 86  | 97  | 166 | 113 | 90  |     |
| NDD1xSWI6        | 106 | 61  | 90  | 92  | 172 | 117 | 86  |     |
| NDD1xBBP1        | 126 | 58  | 85  | 128 | 241 | 122 | 91  |     |
| NDD1xYLL054C     | 5   | 1   | 9   | 4   | 13  | 31  | 8   |     |
| NDT80xSKN7       | 9   | 10  | 14  | 13  | 4   | 8   | 6   |     |
| NHP10xNRG1       | 72  | 79  | 29  | 61  | 74  | 104 | 108 |     |
| NHP10xOAF1       | 34  | 22  | 10  | 25  | 38  | 60  | 39  |     |
| NHP10xPDR1       | 77  | 79  | 56  | 54  | 65  | 121 | 89  |     |
| NHP10xPDR8       | 75  | 57  | 40  | 58  | 86  | 125 | 111 |     |
| NHP10xPHD1       | 52  | 82  | 55  | 51  | 82  | 128 | 114 |     |
| NHP10xRDS1       | 37  | 45  | 18  | 48  | 25  | 131 | 40  |     |
| NHP10xRDS2       | 113 | 97  | 47  | 69  | 98  | 99  | 90  |     |
| NHP10xRGM1       | 238 | 153 | 86  | 248 | 153 | 311 | 225 |     |
| NHP10xRSC30      | 12  | 9   | 0   | 10  | 3   | 40  | 7   |     |
| NHP10xRSC3       | 91  | 98  | 60  | 57  | 72  | 163 | 130 |     |
| NHP10xSKN7       | 71  | 80  | 55  | 71  | 85  | 157 | 101 |     |
| NHP10xSTB5       | 64  | 79  | 55  | 58  | 88  | 80  | 81  |     |
| NHP10xSTP1       | 69  | 71  | 46  | 52  | 71  | 142 | 82  |     |
| NHP10xSTP2       | 27  | 12  | 12  | 22  | 9   | 52  | 28  |     |
| NHP10xSUT1       | 81  | 101 | 78  | 71  | 87  | 148 | 90  |     |
| NHP10xYBL054W    |     | 73  | 94  | 58  | 49  | 66  | 121 | 85  |
| NHP10xYER184C    |     | 105 | 80  | 56  | 81  | 85  | 142 | 130 |
| NHP10xYJL103C157 |     | 115 | 47  | 213 | 107 | 218 | 154 |     |
| NHP10xYPL230W    |     | 238 | 153 | 86  | 248 | 153 | 311 | 225 |
| NHP10xYPR196W    |     | 56  | 73  | 54  | 48  | 80  | 92  | 82  |
| NHP10xYRM1       | 58  | 81  | 52  | 67  | 88  | 145 | 118 |     |
| NHP10xZMS1       | 101 | 135 | 84  | 87  | 97  | 168 | 134 |     |
| NHP6AxNHP6B      | 398 | 835 | 438 | 179 | 222 | 178 | 430 |     |
| NHP6AxPHO2       | 565 | 658 | 406 | 155 | 276 | 378 | 372 |     |
| NHP6AxRLM1       | 174 | 120 | 202 | 148 | 204 | 225 | 159 |     |
| NHP6AxSPT15      | 255 | 816 | 350 | 188 | 224 | 204 | 297 |     |
| NHP6AxSTB5       | 243 | 341 | 350 | 156 | 241 | 230 | 308 |     |
| NHP6BxPHO2       | 697 | 764 | 394 | 134 | 240 | 363 | 415 |     |
| NHP6BxRLM1       | 205 | 126 | 240 | 174 | 190 | 181 | 297 |     |
| NHP6BxSTB5       | 222 | 318 | 382 | 168 | 237 | 195 | 365 |     |

|                 |     |     |     |     |     |     |     |     |
|-----------------|-----|-----|-----|-----|-----|-----|-----|-----|
| NRG1xOPI1       | 45  | 73  | 44  | 83  | 59  | 40  | 51  |     |
| NRG1xPDR1       | 224 | 339 | 377 | 135 | 292 | 230 | 302 |     |
| NRG1xPHD1       | 216 | 342 | 354 | 172 | 323 | 326 | 371 |     |
| NRG1xRDR1       | 206 | 164 | 210 | 160 | 230 | 245 | 287 |     |
| NRG1xRDS1       | 141 | 107 | 126 | 152 | 147 | 271 | 187 |     |
| NRG1xREB1       | 199 | 176 | 187 | 145 | 268 | 236 | 286 |     |
| NRG1xRGM1       | 722 | 469 | 509 | 667 | 723 | 790 | 717 |     |
| NRG1xRIM101     | 137 | 72  | 87  | 104 | 100 | 129 | 102 |     |
| NRG1xRSC3       | 258 | 348 | 349 | 184 | 345 | 312 | 414 |     |
| NRG1xSKN7       | 199 | 387 | 335 | 173 | 422 | 302 | 340 |     |
| NRG1xSTB2       | 203 | 259 | 265 | 147 | 306 | 222 | 299 |     |
| NRG1xSUT1       | 271 | 431 | 355 | 167 | 342 | 278 | 378 |     |
| NRG1xTBF1       | 201 | 270 | 249 | 181 | 211 | 254 | 253 |     |
| NRG1xYBL054W    |     | 256 | 318 | 349 | 172 | 422 | 341 | 395 |
| NRG1xYDR026C169 |     | 130 | 108 | 137 | 195 | 202 | 182 |     |
| NRG1xYER184C340 |     | 382 | 445 | 218 | 418 | 354 | 433 |     |
| NRG1xYJL103C568 |     | 454 | 381 | 572 | 504 | 586 | 539 |     |
| NRG1xYPL230W    |     | 722 | 469 | 509 | 667 | 723 | 790 | 717 |
| NRG1xZMS1       | 319 | 382 | 341 | 227 | 398 | 356 | 460 |     |
| OAF1xOPI1       | 34  | 20  | 12  | 40  | 39  | 37  | 25  |     |
| OAF1xPDR1       | 124 | 142 | 118 | 101 | 113 | 112 | 143 |     |
| OAF1xPDR3       | 58  | 5   | 18  | 29  | 36  | 26  | 30  |     |
| OAF1xPDR8       | 152 | 96  | 77  | 146 | 132 | 186 | 127 |     |
| OAF1xRDS1       | 61  | 29  | 48  | 80  | 40  | 105 | 65  |     |
| OAF1xRGT1       | 139 | 129 | 130 | 140 | 136 | 164 | 115 |     |
| OAF1xSTB5       | 78  | 127 | 114 | 125 | 147 | 131 | 113 |     |
| OAF1xSTP1       | 124 | 132 | 92  | 110 | 103 | 105 | 120 |     |
| OAF1xSUT1       | 156 | 132 | 136 | 105 | 124 | 157 | 144 |     |
| OAF1xTYE7       | 93  | 164 | 51  | 94  | 97  | 90  | 102 |     |
| OAF1xUME6       | 59  | 15  | 29  | 57  | 26  | 44  | 44  |     |
| OAF1xYJL103C311 |     | 180 | 145 | 360 | 181 | 316 | 176 |     |
| OAF1xYPL230W337 |     | 200 | 164 | 439 | 308 | 379 | 256 |     |
| OAF1xYPR196W    |     | 156 | 131 | 131 | 129 | 127 | 167 | 114 |
| OAF1xZMS1       | 139 | 217 | 141 | 148 | 200 | 160 | 186 |     |
| OPI1xRDS2       | 59  | 105 | 56  | 57  | 65  | 60  | 60  |     |

|              |     |     |     |     |     |     |     |
|--------------|-----|-----|-----|-----|-----|-----|-----|
| OPI1xREB1    | 42  | 34  | 34  | 55  | 51  | 55  | 49  |
| OPI1xRGM1    | 124 | 115 | 74  | 193 | 144 | 149 | 127 |
| OPI1xRSC30   | 9   | 0   | 3   | 13  | 11  | 20  | 5   |
| OPI1xRSC3    | 66  | 61  | 64  | 98  | 109 | 79  | 46  |
| OPI1xSFP1    | 44  | 82  | 50  | 52  | 62  | 58  | 55  |
| OPI1xSTB2    | 38  | 47  | 46  | 45  | 64  | 51  | 50  |
| OPI1xSTP3    | 70  | 99  | 53  | 110 | 110 | 89  | 60  |
| OPI1xSUT1    | 51  | 102 | 60  | 49  | 83  | 41  | 46  |
| OPI1xSUT2    | 17  | 19  | 7   | 26  | 24  | 27  | 17  |
| OPI1xYBL054W | 87  | 84  | 64  | 55  | 86  | 78  | 68  |
| OPI1xYDR026C | 44  | 31  | 28  | 48  | 42  | 51  | 46  |
| OPI1xYER184C | 96  | 85  | 69  | 86  | 113 | 120 | 98  |
| OPI1xYJL103C | 165 | 110 | 78  | 222 | 124 | 184 | 134 |
| OPI1xYPL230W | 124 | 115 | 74  | 193 | 144 | 149 | 127 |
| OPI1xYPR196W | 33  | 69  | 48  | 43  | 57  | 56  | 54  |
| OPI1xZMS1    | 51  | 116 | 46  | 72  | 61  | 57  | 84  |
| PBF1xPBF2    | 70  | 73  | 33  | 60  | 94  | 106 | 58  |
| PBF1xSTB3    | 144 | 76  | 80  | 146 | 134 | 173 | 111 |
| PBF2xRTG1    | 2   | 16  | 4   | 7   | 3   | 11  | 5   |
| PBF2xSTB3    | 283 | 269 | 253 | 255 | 411 | 491 | 311 |
| PBF2xXBP1    | 304 | 353 | 210 | 178 | 296 | 329 | 279 |
| PBF2xYBL054W | 217 | 398 | 219 | 163 | 401 | 334 | 322 |
| PDR1xPDR3    | 109 | 35  | 71  | 77  | 75  | 81  | 77  |
| PDR1xRDR1    | 233 | 228 | 255 | 252 | 199 | 217 | 250 |
| PDR1xRDS1    | 116 | 177 | 159 | 176 | 357 | 258 | 170 |
| PDR1xRDS2    | 301 | 508 | 368 | 188 | 308 | 244 | 360 |
| PDR1xREB1    | 173 | 228 | 241 | 156 | 258 | 242 | 245 |
| PDR1xRGM1    | 677 | 703 | 605 | 647 | 691 | 903 | 658 |
| PDR1xRGT1    | 201 | 425 | 380 | 210 | 327 | 216 | 294 |
| PDR1xRSC30   | 31  | 29  | 25  | 26  | 36  | 75  | 22  |
| PDR1xRSC3    | 243 | 578 | 446 | 172 | 326 | 364 | 382 |
| PDR1xRTG3    | 197 | 378 | 408 | 186 | 214 | 257 | 291 |
| PDR1xSKN7    | 233 | 553 | 467 | 195 | 401 | 356 | 329 |
| PDR1xSTB1    | 184 | 401 | 381 | 170 | 237 | 233 | 366 |
| PDR1xSTB2    | 168 | 331 | 324 | 157 | 263 | 255 | 295 |

|              |     |     |     |     |     |     |     |
|--------------|-----|-----|-----|-----|-----|-----|-----|
| PDR1xSTB4    | 141 | 187 | 157 | 125 | 191 | 183 | 186 |
| PDR1xSTP1    | 239 | 540 | 337 | 186 | 258 | 401 | 308 |
| PDR1xSUT1    | 297 | 606 | 474 | 235 | 329 | 432 | 362 |
| PDR1xSWI4    | 239 | 372 | 387 | 138 | 204 | 265 | 318 |
| PDR1xUGA3    | 94  | 88  | 83  | 89  | 81  | 148 | 90  |
| PDR1xUME6    | 115 | 43  | 63  | 132 | 73  | 181 | 129 |
| PDR1xYDR026C | 142 | 194 | 124 | 144 | 155 | 208 | 146 |
| PDR1xYER184C | 303 | 473 | 472 | 217 | 388 | 398 | 415 |
| PDR1xYJL103C | 499 | 564 | 423 | 576 | 492 | 615 | 520 |
| PDR1xYLL054C | 26  | 46  | 29  | 27  | 43  | 110 | 25  |
| PDR1xYPL230W | 677 | 703 | 605 | 647 | 691 | 903 | 658 |
| PDR1xYRM1    | 235 | 430 | 399 | 198 | 279 | 297 | 334 |
| PDR1xZMS1    | 284 | 605 | 449 | 290 | 407 | 458 | 455 |
| PDR3xPDR8    | 85  | 19  | 37  | 62  | 62  | 84  | 93  |
| PDR3xPHO4    | 60  | 18  | 19  | 65  | 36  | 87  | 44  |
| PDR3xRDR1    | 92  | 18  | 40  | 80  | 61  | 62  | 62  |
| PDR3xRDS1    | 60  | 16  | 28  | 57  | 36  | 88  | 39  |
| PDR3xRGT1    | 85  | 24  | 48  | 60  | 72  | 48  | 64  |
| PDR3xRSC3    | 60  | 49  | 50  | 67  | 97  | 102 | 108 |
| PDR3xRTG3    | 47  | 22  | 48  | 48  | 51  | 60  | 50  |
| PDR3xSKN7    | 66  | 28  | 40  | 56  | 96  | 90  | 68  |
| PDR3xSKO1    | 71  | 24  | 35  | 52  | 48  | 80  | 66  |
| PDR3xSTB5    | 48  | 22  | 49  | 48  | 69  | 58  | 56  |
| PDR3xSTP1    | 69  | 38  | 53  | 68  | 79  | 97  | 65  |
| PDR3xSUT1    | 115 | 40  | 64  | 87  | 88  | 124 | 89  |
| PDR3xSUT2    | 23  | 2   | 2   | 27  | 18  | 11  | 13  |
| PDR3xTYE7    | 91  | 32  | 30  | 72  | 43  | 92  | 43  |
| PDR3xUME6    | 44  | 3   | 7   | 35  | 21  | 26  | 17  |
| PDR3xYER184C | 79  | 38  | 59  | 44  | 75  | 103 | 89  |
| PDR3xYJL103C | 134 | 41  | 48  | 144 | 94  | 154 | 107 |
| PDR3xYRM1    | 71  | 26  | 48  | 64  | 68  | 82  | 71  |
| PDR8xPHO4    | 132 | 212 | 107 | 146 | 146 | 251 | 182 |
| PDR8xRDR1    | 208 | 133 | 184 | 202 | 199 | 290 | 286 |
| PDR8xRDS1    | 121 | 85  | 110 | 149 | 131 | 270 | 176 |
| PDR8xREB1    | 159 | 129 | 163 | 161 | 254 | 284 | 256 |

|              |     |     |     |     |     |      |     |     |
|--------------|-----|-----|-----|-----|-----|------|-----|-----|
| PDR8xRGT1    | 242 | 333 | 302 | 256 | 302 | 323  | 325 |     |
| PDR8xRSC30   | 35  | 12  | 24  | 19  | 27  | 64   | 25  |     |
| PDR8xRSC3    | 221 | 315 | 296 | 199 | 309 | 372  | 358 |     |
| PDR8xSTB1    | 179 | 317 | 258 | 154 | 237 | 305  | 333 |     |
| PDR8xSTB5    | 187 | 294 | 264 | 188 | 278 | 321  | 318 |     |
| PDR8xSTP1    | 198 | 287 | 212 | 210 | 243 | 393  | 292 |     |
| PDR8xSUT1    | 251 | 336 | 308 | 216 | 267 | 387  | 365 |     |
| PDR8xSUT2    | 89  | 44  | 39  | 80  | 85  | 80   | 68  |     |
| PDR8xTYE7    | 168 | 342 | 160 | 150 | 191 | 271  | 216 |     |
| PDR8xUME6    | 98  | 28  | 39  | 90  | 76  | 135  | 102 |     |
| PDR8xYER184C | 308 | 278 | 348 | 209 | 367 | 474  | 424 |     |
| PDR8xYJL103C | 516 | 382 | 311 | 577 | 479 | 796  | 511 |     |
| PDR8xYPR196W |     | 252 | 312 | 297 | 256 | 290  | 336 | 328 |
| PDR8xYRM1    | 206 | 295 | 289 | 196 | 307 | 468  | 378 |     |
| PHD1xPHO4    | 210 | 399 | 175 | 170 | 200 | 318  | 244 |     |
| PHD1xRDS1    | 166 | 149 | 127 | 176 | 184 | 331  | 204 |     |
| PHD1xREB1    | 176 | 168 | 265 | 153 | 235 | 235  | 232 |     |
| PHD1xRGM1    | 646 | 745 | 623 | 636 | 695 | 1003 | 740 |     |
| PHD1xRPH1    | 170 | 257 | 169 | 162 | 172 | 382  | 258 |     |
| PHD1xRSC30   | 20  | 45  | 12  | 17  | 35  | 107  | 27  |     |
| PHD1xRSC3    | 186 | 773 | 448 | 174 | 386 | 532  | 436 |     |
| PHD1xSKN7    | 210 | 523 | 430 | 183 | 402 | 428  | 360 |     |
| PHD1xSOK2    | 435 | 503 | 459 | 199 | 286 | 569  | 516 |     |
| PHD1xSTB2    | 168 | 344 | 360 | 149 | 262 | 214  | 291 |     |
| PHD1xSTP1    | 232 | 504 | 366 | 201 | 301 | 409  | 398 |     |
| PHD1xSTP2    | 90  | 91  | 78  | 86  | 53  | 161  | 136 |     |
| PHD1xSUT1    | 265 | 633 | 437 | 227 | 392 | 415  | 397 |     |
| PHD1xTYE7    | 201 | 468 | 220 | 147 | 277 | 295  | 256 |     |
| PHD1xUGA3    | 89  | 86  | 72  | 104 | 89  | 197  | 96  |     |
| PHD1xBBP1    | 207 | 427 | 360 | 200 | 382 | 294  | 315 |     |
| PHD1xYDR026C | 140 | 160 | 125 | 141 | 185 | 214  | 139 |     |
| PHD1xYER184C | 245 | 509 | 456 | 209 | 385 | 411  | 440 |     |
| PHD1xYJL103C | 431 | 623 | 438 | 569 | 449 | 657  | 545 |     |
| PHD1xYPL230W | 646 | 745 | 623 | 636 | 695 | 1003 | 740 |     |
| PHD1xZMS1    | 262 | 668 | 497 | 273 | 451 | 451  | 506 |     |

|              |     |     |     |     |     |     |     |
|--------------|-----|-----|-----|-----|-----|-----|-----|
| PHO2xSPT15   | 351 | 709 | 398 | 166 | 203 | 375 | 372 |
| PHO4xRAP1    | 137 | 63  | 32  | 75  | 55  | 90  | 68  |
| PHO4xRDS1    | 134 | 92  | 54  | 180 | 125 | 264 | 118 |
| PHO4xREB1    | 185 | 160 | 148 | 208 | 155 | 262 | 202 |
| PHO4xRSC3    | 181 | 418 | 222 | 191 | 231 | 441 | 280 |
| PHO4xSFP1    | 202 | 284 | 118 | 168 | 124 | 216 | 187 |
| PHO4xSKN7    | 175 | 279 | 199 | 161 | 244 | 343 | 260 |
| PHO4xSTB2    | 184 | 255 | 174 | 205 | 156 | 229 | 220 |
| PHO4xSTB4    | 135 | 146 | 58  | 144 | 84  | 147 | 99  |
| PHO4xSTP1    | 192 | 315 | 133 | 169 | 190 | 305 | 251 |
| PHO4xSTP2    | 46  | 55  | 34  | 77  | 36  | 105 | 77  |
| PHO4xSUT1    | 192 | 335 | 208 | 175 | 205 | 363 | 245 |
| PHO4xTBF1    | 162 | 229 | 144 | 154 | 126 | 206 | 163 |
| PHO4xTYE7    | 260 | 470 | 167 | 276 | 162 | 449 | 219 |
| PHO4xYDR026C | 160 | 139 | 84  | 172 | 118 | 261 | 127 |
| PHO4xYLL054C | 21  | 19  | 5   | 37  | 47  | 89  | 27  |
| PHO4xYRM1    | 146 | 260 | 152 | 208 | 135 | 320 | 224 |
| RAP1xRCS1    | 129 | 144 | 92  | 95  | 118 | 130 | 95  |
| RAP1xRPH1    | 134 | 44  | 35  | 86  | 83  | 153 | 67  |
| RAP1xRSC3    | 145 | 204 | 74  | 110 | 120 | 135 | 116 |
| RAP1xSFP1    | 218 | 139 | 108 | 127 | 147 | 119 | 111 |
| RAP1xSTP1    | 86  | 96  | 56  | 65  | 123 | 137 | 93  |
| RAP1xSTP2    | 31  | 22  | 18  | 30  | 20  | 44  | 15  |
| RAP1xTYE7    | 107 | 96  | 38  | 65  | 63  | 104 | 76  |
| RAP1xYJL103C | 289 | 162 | 92  | 291 | 180 | 249 | 147 |
| RAP1xYLL054C | 10  | 20  | 4   | 10  | 11  | 52  | 11  |
| RCS1xRPH1    | 227 | 270 | 174 | 193 | 155 | 308 | 236 |
| RCS1xRSC3    | 252 | 647 | 392 | 191 | 322 | 398 | 368 |
| RCS1xSFP1    | 213 | 486 | 395 | 164 | 257 | 262 | 287 |
| RCS1xSOK2    | 441 | 600 | 459 | 209 | 257 | 594 | 478 |
| RCS1xSTP2    | 84  | 95  | 53  | 92  | 36  | 120 | 99  |
| RCS1xSUT1    | 257 | 571 | 447 | 208 | 350 | 401 | 346 |
| RCS1xZMS1    | 291 | 713 | 484 | 259 | 407 | 438 | 448 |
| RDR1xRGT1    | 188 | 226 | 216 | 265 | 200 | 276 | 306 |
| RDR1xRSC30   | 39  | 6   | 10  | 36  | 25  | 54  | 28  |

|              |     |     |     |     |     |     |     |
|--------------|-----|-----|-----|-----|-----|-----|-----|
| RDR1xRSC3    | 249 | 200 | 227 | 234 | 234 | 295 | 352 |
| RDR1xSKN7    | 230 | 235 | 214 | 181 | 225 | 303 | 318 |
| RDR1xSTB1    | 199 | 253 | 233 | 186 | 182 | 233 | 315 |
| RDR1xSTP1    | 198 | 227 | 189 | 210 | 194 | 293 | 300 |
| RDR1xSUT1    | 252 | 257 | 238 | 241 | 185 | 325 | 320 |
| RDR1xUGA3    | 97  | 42  | 39  | 102 | 68  | 144 | 72  |
| RDR1xYRM1    | 225 | 202 | 243 | 238 | 185 | 348 | 335 |
| RDS1xRDS2    | 181 | 171 | 119 | 154 | 163 | 219 | 213 |
| RDS1xREB1    | 106 | 82  | 60  | 154 | 125 | 193 | 126 |
| RDS1xRGM1    | 451 | 184 | 209 | 580 | 326 | 753 | 337 |
| RDS1xRGT1    | 88  | 120 | 109 | 158 | 132 | 203 | 148 |
| RDS1xRPH1    | 89  | 72  | 54  | 130 | 75  | 287 | 142 |
| RDS1xRPN4    | 66  | 56  | 48  | 100 | 37  | 111 | 78  |
| RDS1xRSC30   | 14  | 19  | 15  | 10  | 24  | 92  | 10  |
| RDS1xRSC3    | 108 | 220 | 154 | 143 | 164 | 365 | 195 |
| RDS1xSKN7    | 154 | 194 | 151 | 231 | 247 | 311 | 176 |
| RDS1xSTB1    | 102 | 141 | 115 | 145 | 124 | 233 | 178 |
| RDS1xSTB2    | 108 | 122 | 88  | 132 | 111 | 207 | 177 |
| RDS1xSTB5    | 115 | 112 | 134 | 135 | 119 | 185 | 171 |
| RDS1xSTP1    | 177 | 152 | 97  | 182 | 140 | 370 | 161 |
| RDS1xSTP2    | 40  | 30  | 24  | 67  | 20  | 133 | 53  |
| RDS1xSUT1    | 167 | 215 | 194 | 218 | 181 | 382 | 195 |
| RDS1xSWI4    | 153 | 140 | 120 | 118 | 108 | 271 | 158 |
| RDS1xSWI6    | 100 | 121 | 113 | 143 | 83  | 221 | 200 |
| RDS1xUGA3    | 63  | 25  | 30  | 78  | 54  | 170 | 44  |
| RDS1xUME6    | 69  | 8   | 8   | 96  | 53  | 125 | 58  |
| RDS1xBBP1    | 109 | 115 | 102 | 176 | 195 | 235 | 134 |
| RDS1xYDR026C | 89  | 55  | 37  | 134 | 89  | 193 | 96  |
| RDS1xYDR520C | 12  | 4   | 12  | 12  | 12  | 33  | 5   |
| RDS1xYER184C | 176 | 166 | 132 | 146 | 218 | 321 | 211 |
| RDS1xYJL103C | 282 | 172 | 140 | 419 | 245 | 517 | 251 |
| RDS1xYLL054C | 22  | 19  | 9   | 43  | 43  | 111 | 26  |
| RDS1xYPL230W | 451 | 184 | 209 | 580 | 326 | 753 | 337 |
| RDS1xYRM1    | 137 | 115 | 143 | 169 | 123 | 320 | 184 |
| RDS1xZMS1    | 167 | 174 | 172 | 250 | 167 | 383 | 251 |



|              |     |     |     |     |     |     |     |
|--------------|-----|-----|-----|-----|-----|-----|-----|
| RDS2xRGM1    | 831 | 742 | 557 | 699 | 728 | 720 | 752 |
| RDS2xSKN7    | 339 | 488 | 421 | 206 | 344 | 283 | 378 |
| RDS2xSNT2    | 25  | 4   | 9   | 16  | 4   | 15  | 6   |
| RDS2xSTB3    | 231 | 200 | 181 | 175 | 231 | 204 | 207 |
| RDS2xSTB4    | 222 | 219 | 131 | 153 | 166 | 218 | 196 |
| RDS2xSTB5    | 234 | 433 | 382 | 140 | 300 | 259 | 287 |
| RDS2xSTP1    | 302 | 527 | 322 | 201 | 282 | 228 | 353 |
| RDS2xSUT1    | 375 | 568 | 442 | 186 | 337 | 296 | 371 |
| RDS2xTYE7    | 207 | 506 | 173 | 156 | 190 | 219 | 256 |
| RDS2xYDR026C | 212 | 197 | 150 | 158 | 163 | 194 | 183 |
| RDS2xYJL103C | 725 | 677 | 422 | 621 | 495 | 627 | 574 |
| RDS2xYPL230W | 831 | 742 | 557 | 699 | 728 | 720 | 752 |
| RDS2xYPR196W | 241 | 482 | 415 | 174 | 330 | 230 | 317 |
| RDS2xZMS1    | 361 | 701 | 415 | 240 | 427 | 308 | 434 |
| REB1xRGM1    | 528 | 355 | 384 | 651 | 634 | 719 | 597 |
| REB1xRSC30   | 18  | 11  | 6   | 13  | 11  | 52  | 21  |
| REB1xRSC3    | 158 | 188 | 226 | 168 | 199 | 278 | 223 |
| REB1xSKN7    | 158 | 182 | 212 | 166 | 303 | 255 | 279 |
| REB1xSNT2    | 15  | 4   | 5   | 7   | 9   | 25  | 7   |
| REB1xSTB1    | 179 | 207 | 200 | 151 | 207 | 231 | 274 |
| REB1xSTB2    | 167 | 151 | 207 | 158 | 201 | 208 | 262 |
| REB1xSTB3    | 168 | 90  | 131 | 163 | 200 | 218 | 196 |
| REB1xSTB5    | 110 | 198 | 251 | 117 | 249 | 219 | 234 |
| REB1xSTP1    | 200 | 197 | 208 | 164 | 211 | 287 | 287 |
| REB1xSTP2    | 45  | 27  | 39  | 49  | 31  | 104 | 67  |
| REB1xSUM1    | 82  | 26  | 69  | 113 | 89  | 118 | 76  |
| REB1xSUT1    | 181 | 191 | 237 | 153 | 258 | 248 | 233 |
| REB1xSWI4    | 240 | 202 | 199 | 139 | 190 | 243 | 250 |
| REB1xSWI6    | 144 | 174 | 214 | 134 | 188 | 215 | 252 |
| REB1xTBF1    | 194 | 155 | 230 | 174 | 331 | 206 | 240 |
| REB1xTYE7    | 211 | 191 | 211 | 212 | 210 | 297 | 253 |
| REB1xUME6    | 95  | 13  | 58  | 106 | 85  | 148 | 108 |
| REB1xYDR026C | 131 | 113 | 84  | 111 | 152 | 146 | 123 |
| REB1xYER184C | 216 | 195 | 285 | 161 | 331 | 357 | 338 |
| REB1xYJL103C | 390 | 253 | 285 | 487 | 428 | 588 | 432 |

|                   |      |     |      |      |      |      |     |
|-------------------|------|-----|------|------|------|------|-----|
| REB1xYPL230W 528  | 355  | 384 | 651  | 634  | 719  | 597  |     |
| REB1xYPR196W 140  | 190  | 228 | 164  | 207  | 228  | 206  |     |
| REB1xYRM1 169     | 186  | 230 | 177  | 254  | 326  | 268  |     |
| REB1xYRR1 16      | 0    | 3   | 9    | 12   | 8    | 17   |     |
| REB1xZMS1 211     | 257  | 277 | 236  | 328  | 327  | 343  |     |
| RFX1xRSC3 3       | 0    | 3   | 2    | 0    | 9    | 5    |     |
| RGM1xRPH1 626     | 389  | 292 | 770  | 390  | 969  | 536  |     |
| RGM1xRSC3 717     | 879  | 764 | 740  | 764  | 946  | 747  |     |
| RGM1xSKN7 648     | 756  | 675 | 763  | 817  | 1081 | 762  |     |
| RGM1xSOK2 1188    | 729  | 752 | 671  | 670  | 1479 | 958  |     |
| RGM1xSTP1 660     | 632  | 530 | 758  | 569  | 951  | 694  |     |
| RGM1xSUT1 830     | 824  | 790 | 840  | 818  | 1182 | 820  |     |
| RGM1xTBF1 538     | 541  | 557 | 610  | 629  | 645  | 623  |     |
| RGM1xUGA3 266     | 124  | 118 | 374  | 187  | 458  | 175  |     |
| RGM1xUME6 280     | 61   | 115 | 325  | 178  | 409  | 274  |     |
| RGM1xYDR026C      | 469  | 290 | 216  | 561  | 440  | 617  | 376 |
| RGM1xYER130C214   | 74   | 74  | 242  | 129  | 264  | 154  |     |
| RGM1xYER184C926   | 688  | 729 | 792  | 857  | 1233 | 907  |     |
| RGM1xYJL103C 1519 | 857  | 680 | 2136 | 1090 | 1963 | 1070 |     |
| RGM1xYLL054C 80   | 55   | 39  | 113  | 71   | 232  | 72   |     |
| RGM1xZMS1 916     | 1050 | 903 | 1124 | 930  | 1425 | 1158 |     |
| RGT1xRSC3 174     | 426  | 439 | 151  | 251  | 272  | 343  |     |
| RGT1xSKN7 188     | 381  | 370 | 189  | 313  | 267  | 345  |     |
| RGT1xSTB1 181     | 407  | 340 | 183  | 250  | 224  | 310  |     |
| RGT1xSTB3 158     | 168  | 198 | 187  | 215  | 191  | 205  |     |
| RGT1xSTP1 193     | 422  | 299 | 192  | 238  | 255  | 304  |     |
| RGT1xSUT1 282     | 473  | 410 | 254  | 318  | 283  | 364  |     |
| RGT1xSUT2 54      | 67   | 54  | 62   | 74   | 64   | 60   |     |
| RGT1xUGA3 105     | 82   | 67  | 104  | 68   | 146  | 66   |     |
| RGT1xUME6 78      | 42   | 47  | 95   | 68   | 113  | 85   |     |
| RGT1xYJL103C 512  | 584  | 427 | 620  | 502  | 647  | 558  |     |
| RGT1xYPR196W      | 282  | 445 | 459  | 279  | 341  | 284  | 343 |
| RGT1xYRM1 225     | 450  | 422 | 198  | 317  | 398  | 402  |     |
| RGT1xZMS1 297     | 534  | 498 | 318  | 380  | 343  | 487  |     |
| RLM1xSPT15 185    | 118  | 268 | 177  | 184  | 231  | 183  |     |

|               |     |     |     |     |     |     |     |    |
|---------------|-----|-----|-----|-----|-----|-----|-----|----|
| RPH1xRSC3     | 181 | 313 | 169 | 228 | 174 | 377 | 272 |    |
| RPH1xSTP3     | 217 | 164 | 178 | 281 | 191 | 324 | 174 |    |
| RPH1xSUT1     | 228 | 223 | 202 | 224 | 190 | 443 | 270 |    |
| RPH1xYER130C  | 59  | 21  | 16  | 69  | 36  | 66  | 52  |    |
| RPH1xYER184C  | 259 | 198 | 195 | 188 | 185 | 427 | 302 |    |
| RPH1xYJL103C  | 463 | 229 | 188 | 536 | 242 | 641 | 341 |    |
| RPH1xYPL230W  | 626 | 389 | 292 | 770 | 390 | 969 | 536 |    |
| RPH1xZMS1     | 259 | 329 | 234 | 297 | 228 | 505 | 334 |    |
| RPN4xSUT1     | 107 | 151 | 116 | 135 | 124 | 165 | 138 |    |
| RPN4xUME6     | 71  | 12  | 27  | 82  | 38  | 106 | 58  |    |
| RPN4xYDR026C  | 83  | 78  | 33  | 101 | 92  | 107 | 67  |    |
| RPN4xZMS1     | 125 | 177 | 150 | 185 | 143 | 198 | 173 |    |
| RSC30xRSC3    | 32  | 54  | 19  | 31  | 37  | 218 | 41  |    |
| RSC30xSKN7    | 56  | 36  | 38  | 32  | 43  | 149 | 54  |    |
| RSC30xSTB2    | 19  | 22  | 13  | 20  | 11  | 41  | 26  |    |
| RSC30xSTP1    | 41  | 35  | 31  | 26  | 19  | 132 | 38  |    |
| RSC30xSTP2    | 8   | 9   | 5   | 13  | 2   | 62  | 13  |    |
| RSC30xSUT1    | 31  | 39  | 26  | 21  | 27  | 134 | 35  |    |
| RSC30xUGA3    | 18  | 4   | 5   | 12  | 10  | 46  | 5   |    |
| RSC30xUME6    | 28  | 0   | 12  | 23  | 7   | 33  | 8   |    |
| RSC30xYER051W |     | 15  | 4   | 5   | 6   | 12  | 13  | 5  |
| RSC30xYER184C |     | 67  | 29  | 33  | 30  | 32  | 108 | 37 |
| RSC30xYJL103C | 110 | 28  | 32  | 78  | 29  | 145 | 40  |    |
| RSC30xYRM1    | 50  | 8   | 38  | 31  | 14  | 74  | 43  |    |
| RSC30xZMS1    | 48  | 44  | 24  | 31  | 45  | 106 | 30  |    |
| RSC3xRTG3     | 180 | 377 | 483 | 167 | 244 | 257 | 363 |    |
| RSC3xSFP1     | 221 | 529 | 344 | 167 | 299 | 248 | 360 |    |
| RSC3xSKN7     | 251 | 602 | 630 | 257 | 507 | 615 | 477 |    |
| RSC3xSTB1     | 197 | 615 | 464 | 118 | 258 | 273 | 386 |    |
| RSC3xSTB2     | 179 | 422 | 351 | 197 | 196 | 236 | 293 |    |
| RSC3xSTB5     | 227 | 419 | 472 | 125 | 326 | 265 | 336 |    |
| RSC3xSTP1     | 266 | 677 | 454 | 195 | 336 | 522 | 532 |    |
| RSC3xSTP2     | 79  | 149 | 70  | 71  | 50  | 212 | 163 |    |
| RSC3xSUT1     | 206 | 771 | 600 | 206 | 370 | 553 | 535 |    |
| RSC3xSUT2     | 65  | 94  | 74  | 68  | 127 | 52  | 59  |    |

|              |     |     |     |     |     |     |     |
|--------------|-----|-----|-----|-----|-----|-----|-----|
| RSC3xSWI4    | 271 | 552 | 473 | 141 | 229 | 250 | 343 |
| RSC3xSWI5    | 405 | 652 | 521 | 334 | 441 | 693 | 505 |
| RSC3xSWI6    | 171 | 540 | 432 | 150 | 208 | 250 | 352 |
| RSC3xTHI2    | 2   | 6   | 10  | 0   | 2   | 0   | 11  |
| RSC3xUGA3    | 95  | 116 | 105 | 101 | 106 | 216 | 111 |
| RSC3xUME6    | 177 | 39  | 112 | 136 | 88  | 201 | 186 |
| RSC3xXBP1    | 244 | 436 | 350 | 271 | 466 | 277 | 362 |
| RSC3xYBL054W | 245 | 546 | 391 | 167 | 330 | 304 | 385 |
| RSC3xYDR026C | 162 | 203 | 152 | 147 | 187 | 262 | 132 |
| RSC3xYER051W | 70  | 86  | 92  | 61  | 84  | 60  | 63  |
| RSC3xYER184C | 354 | 607 | 579 | 221 | 416 | 594 | 524 |
| RSC3xYJL103C | 622 | 661 | 528 | 647 | 522 | 868 | 651 |
| RSC3xYLL054C | 11  | 61  | 28  | 28  | 53  | 197 | 41  |
| RSC3xYPL230W | 717 | 879 | 764 | 740 | 764 | 946 | 747 |
| RSC3xYPR196W | 173 | 324 | 371 | 155 | 206 | 231 | 338 |
| RSC3xYRM1    | 210 | 336 | 442 | 188 | 263 | 386 | 412 |
| RSC3xZMS1    | 286 | 790 | 553 | 267 | 465 | 428 | 505 |
| RTG3xSKN7    | 180 | 390 | 433 | 186 | 267 | 309 | 320 |
| RTG3xSTB1    | 186 | 360 | 405 | 168 | 248 | 258 | 365 |
| RTG3xSTB5    | 242 | 360 | 380 | 150 | 225 | 214 | 303 |
| RTG3xSUM1    | 80  | 91  | 98  | 97  | 105 | 113 | 87  |
| RTG3xSUT1    | 178 | 372 | 396 | 202 | 249 | 284 | 344 |
| RTG3xSWI4    | 230 | 349 | 399 | 166 | 225 | 284 | 333 |
| RTG3xSWI6    | 162 | 363 | 372 | 174 | 184 | 239 | 291 |
| RTG3xTYE7    | 178 | 399 | 248 | 184 | 223 | 308 | 227 |
| SFP1xTYE7    | 192 | 428 | 167 | 161 | 173 | 251 | 220 |
| SIG1xXBP1    | 281 | 102 | 112 | 248 | 144 | 92  | 85  |
| SIP4xSKN7    | 23  | 3   | 6   | 31  | 11  | 12  | 7   |
| SIP4xSTP1    | 21  | 6   | 18  | 14  | 11  | 14  | 14  |
| SKN7xSOK2    | 389 | 543 | 488 | 236 | 330 | 600 | 459 |
| SKN7xSTB1    | 160 | 405 | 488 | 165 | 271 | 303 | 345 |
| SKN7xSTB4    | 167 | 167 | 149 | 143 | 184 | 236 | 171 |
| SKN7xSTB5    | 141 | 406 | 381 | 187 | 357 | 264 | 297 |
| SKN7xSTP1    | 196 | 484 | 347 | 215 | 378 | 417 | 383 |
| SKN7xSUT1    | 252 | 677 | 528 | 241 | 442 | 495 | 404 |

|              |      |     |     |     |     |      |     |
|--------------|------|-----|-----|-----|-----|------|-----|
| SKN7xSUT2    | 61   | 82  | 54  | 70  | 100 | 60   | 59  |
| SKN7xSWI4    | 218  | 403 | 482 | 138 | 241 | 315  | 289 |
| SKN7xSWI5    | 364  | 594 | 536 | 442 | 447 | 637  | 494 |
| SKN7xSWI6    | 142  | 389 | 444 | 179 | 226 | 269  | 319 |
| SKN7xUGA3    | 119  | 82  | 94  | 110 | 113 | 223  | 110 |
| SKN7xUME6    | 90   | 31  | 53  | 98  | 89  | 165  | 134 |
| SKN7xYBL054W | 221  | 546 | 426 | 190 | 455 | 376  | 398 |
| SKN7xYDR026C | 137  | 197 | 133 | 161 | 232 | 271  | 189 |
| SKN7xYDR520C | 16   | 28  | 14  | 19  | 38  | 33   | 23  |
| SKN7xYER184C | 381  | 467 | 485 | 231 | 496 | 466  | 504 |
| SKN7xYJL103C | 580  | 560 | 444 | 588 | 544 | 758  | 569 |
| SKN7xYLL054C | 55   | 50  | 20  | 35  | 70  | 107  | 41  |
| SKN7xYPL230W | 648  | 756 | 675 | 763 | 817 | 1081 | 762 |
| SKN7xYRM1    | 177  | 356 | 362 | 206 | 324 | 407  | 398 |
| SKN7xZMS1    | 276  | 617 | 465 | 286 | 453 | 552  | 504 |
| SKO1xSUM1    | 80   | 84  | 99  | 139 | 107 | 149  | 119 |
| SNF1xYBL054W | 1    | 0   | 1   | 2   | 18  | 1    | 2   |
| SNT2xSTB2    | 17   | 4   | 7   | 7   | 12  | 15   | 4   |
| SNT2xSTB5    | 35   | 4   | 5   | 10  | 2   | 23   | 9   |
| SNT2xSTP3    | 17   | 4   | 2   | 22  | 6   | 17   | 5   |
| SNT2xYER184C | 8    | 3   | 9   | 6   | 11  | 22   | 12  |
| SOK2xSUT1    | 402  | 552 | 500 | 230 | 290 | 540  | 474 |
| SOK2xYPL230W | 1188 | 729 | 752 | 671 | 670 | 1479 | 958 |
| SOK2xZMS1    | 472  | 599 | 507 | 286 | 326 | 620  | 582 |
| SPT15xUPC2   | 313  | 550 | 547 | 292 | 250 | 303  | 418 |
| SPT23xSTB3   | 162  | 200 | 206 | 146 | 186 | 188  | 279 |
| SRD1xYER130C | 14   | 6   | 4   | 19  | 12  | 10   | 13  |
| STB1xSTB2    | 170  | 377 | 271 | 143 | 238 | 241  | 370 |
| STB1xSTB3    | 175  | 161 | 156 | 138 | 211 | 230  | 217 |
| STB1xSTP1    | 186  | 429 | 286 | 167 | 201 | 270  | 346 |
| STB1xSUT1    | 197  | 470 | 474 | 164 | 268 | 276  | 344 |
| STB1xSWI4    | 359  | 624 | 495 | 260 | 401 | 368  | 528 |
| STB1xSWI6    | 267  | 602 | 444 | 216 | 393 | 297  | 488 |
| STB1xUGA3    | 102  | 71  | 69  | 78  | 89  | 174  | 106 |
| STB1xBBP1    | 256  | 349 | 379 | 224 | 431 | 282  | 359 |

|              |     |     |     |     |     |     |     |
|--------------|-----|-----|-----|-----|-----|-----|-----|
| STB1xYDR026C | 150 | 191 | 140 | 137 | 144 | 178 | 165 |
| STB1xYER184C | 247 | 408 | 476 | 150 | 301 | 364 | 443 |
| STB1xYLL054C | 16  | 28  | 25  | 21  | 23  | 79  | 24  |
| STB1xYRM1    | 184 | 384 | 366 | 186 | 242 | 354 | 375 |
| STB2xSTB3    | 170 | 131 | 178 | 153 | 221 | 219 | 185 |
| STB2xSTP1    | 189 | 328 | 282 | 158 | 223 | 241 | 343 |
| STB2xSTP2    | 46  | 52  | 54  | 53  | 25  | 89  | 98  |
| STB2xSUM1    | 84  | 72  | 81  | 112 | 89  | 90  | 87  |
| STB2xSUT1    | 148 | 329 | 351 | 137 | 277 | 211 | 341 |
| STB2xSWI4    | 233 | 372 | 281 | 137 | 222 | 277 | 343 |
| STB2xSWI6    | 176 | 327 | 317 | 159 | 278 | 267 | 320 |
| STB2xTBF1    | 197 | 290 | 316 | 170 | 329 | 194 | 279 |
| STB2xTYE7    | 206 | 304 | 234 | 202 | 217 | 269 | 282 |
| STB2xUME6    | 85  | 25  | 76  | 130 | 93  | 145 | 125 |
| STB2xYDR026C | 136 | 150 | 130 | 116 | 159 | 162 | 152 |
| STB2xYER184C | 227 | 342 | 415 | 170 | 343 | 363 | 422 |
| STB2xYJL103C | 402 | 472 | 385 | 513 | 438 | 594 | 509 |
| STB2xYRR1    | 9   | 3   | 4   | 12  | 11  | 11  | 16  |
| STB2xZMS1    | 202 | 507 | 366 | 225 | 345 | 286 | 364 |
| STB3xSWI4    | 223 | 155 | 158 | 156 | 196 | 271 | 193 |
| STB3xSWI6    | 145 | 171 | 147 | 128 | 212 | 172 | 181 |
| STB3xXBP1    | 208 | 199 | 210 | 213 | 242 | 256 | 237 |
| STB3xYBL054W | 260 | 290 | 298 | 164 | 407 | 320 | 358 |
| STB3xYDR026C | 132 | 70  | 49  | 110 | 138 | 152 | 110 |
| STB3xYRR1    | 8   | 2   | 4   | 9   | 12  | 12  | 10  |
| STB4xSTB5    | 136 | 174 | 134 | 153 | 138 | 194 | 186 |
| STB4xSUT1    | 151 | 239 | 160 | 166 | 169 | 207 | 199 |
| STB4xSUT2    | 36  | 22  | 15  | 49  | 68  | 43  | 39  |
| STB4xUGA3    | 71  | 30  | 33  | 80  | 38  | 94  | 53  |
| STB4xYER184C | 180 | 186 | 171 | 160 | 235 | 310 | 216 |
| STB4xYJL103C | 330 | 231 | 172 | 436 | 297 | 519 | 265 |
| STB5xSTP2    | 72  | 60  | 56  | 77  | 36  | 90  | 67  |
| STB5xSUT1    | 147 | 422 | 471 | 144 | 329 | 257 | 293 |
| STB5xSUT2    | 45  | 87  | 58  | 67  | 96  | 74  | 65  |
| STB5xYDR520C | 16  | 20  | 19  | 26  | 24  | 27  | 19  |

|              |     |     |     |     |     |     |     |
|--------------|-----|-----|-----|-----|-----|-----|-----|
| STB5xYER184C | 248 | 415 | 475 | 201 | 369 | 349 | 372 |
| STB5xYJL103C | 453 | 555 | 447 | 535 | 432 | 610 | 476 |
| STP1xSTP2    | 76  | 108 | 63  | 90  | 61  | 175 | 110 |
| STP1xSTP3    | 283 | 369 | 332 | 292 | 307 | 395 | 309 |
| STP1xSUM1    | 95  | 52  | 54  | 85  | 68  | 97  | 92  |
| STP1xSUT1    | 233 | 601 | 462 | 285 | 325 | 529 | 407 |
| STP1xSWI4    | 245 | 415 | 296 | 156 | 189 | 319 | 296 |
| STP1xSWI6    | 156 | 380 | 286 | 162 | 206 | 266 | 287 |
| STP1xTHI2    | 10  | 3   | 6   | 3   | 1   | 0   | 6   |
| STP1xTYE7    | 180 | 463 | 172 | 146 | 249 | 276 | 258 |
| STP1xUGA3    | 92  | 86  | 55  | 95  | 70  | 218 | 81  |
| STP1xUME6    | 110 | 46  | 81  | 137 | 71  | 238 | 145 |
| STP1xYDR026C | 160 | 206 | 123 | 176 | 201 | 251 | 179 |
| STP1xYER184C | 280 | 493 | 417 | 219 | 357 | 465 | 427 |
| STP1xYJL103C | 481 | 578 | 354 | 628 | 407 | 698 | 541 |
| STP1xYLL054C | 22  | 42  | 17  | 31  | 37  | 167 | 35  |
| STP1xYPL230W | 660 | 632 | 530 | 758 | 569 | 951 | 694 |
| STP1xZMS1    | 266 | 638 | 425 | 353 | 342 | 496 | 487 |
| STP2xSUM1    | 28  | 7   | 9   | 29  | 14  | 48  | 26  |
| STP2xSUT1    | 78  | 123 | 79  | 106 | 63  | 175 | 134 |
| STP2xYER184C | 84  | 94  | 84  | 73  | 53  | 182 | 119 |
| STP2xYJL103C | 153 | 107 | 73  | 225 | 49  | 288 | 137 |
| STP2xYLL054C | 4   | 15  | 7   | 18  | 6   | 60  | 19  |
| STP2xZMS1    | 94  | 128 | 82  | 136 | 48  | 165 | 150 |
| STP3xSUT1    | 283 | 423 | 447 | 304 | 317 | 381 | 292 |
| SUM1xSWI6    | 84  | 73  | 62  | 70  | 120 | 81  | 57  |
| SUT1xSUT2    | 71  | 78  | 68  | 64  | 103 | 75  | 55  |
| SUT1xSWI4    | 244 | 444 | 495 | 154 | 237 | 302 | 295 |
| SUT1xSWI6    | 183 | 423 | 460 | 176 | 217 | 237 | 328 |
| SUT1xTYE7    | 215 | 418 | 231 | 182 | 284 | 320 | 304 |
| SUT1xUGA3    | 125 | 95  | 107 | 97  | 98  | 215 | 102 |
| SUT1xUME6    | 140 | 30  | 96  | 148 | 83  | 241 | 186 |
| SUT1xYDR026C | 149 | 168 | 164 | 152 | 237 | 248 | 162 |
| SUT1xYDR520C | 31  | 22  | 36  | 16  | 27  | 35  | 38  |
| SUT1xYER130C | 70  | 59  | 67  | 63  | 72  | 94  | 61  |

|              |     |     |     |     |     |      |     |
|--------------|-----|-----|-----|-----|-----|------|-----|
| SUT1xYER184C | 444 | 542 | 556 | 237 | 475 | 510  | 507 |
| SUT1xYJL103C | 635 | 623 | 514 | 644 | 540 | 764  | 598 |
| SUT1xYLL054C | 51  | 60  | 37  | 50  | 50  | 171  | 44  |
| SUT1xYPL230W | 830 | 824 | 790 | 840 | 818 | 1182 | 820 |
| SUT1xYPR196W | 238 | 449 | 427 | 200 | 257 | 297  | 323 |
| SUT1xYRM1    | 216 | 426 | 441 | 208 | 294 | 409  | 421 |
| SUT1xZMS1    | 353 | 745 | 645 | 355 | 478 | 577  | 568 |
| SUT2xBBP1    | 75  | 77  | 69  | 96  | 131 | 46   | 64  |
| SUT2xYER184C | 104 | 103 | 69  | 78  | 96  | 86   | 85  |
| SUT2xYJL103C | 175 | 127 | 56  | 208 | 131 | 151  | 117 |
| SUT2xZMS1    | 78  | 98  | 96  | 111 | 161 | 85   | 84  |
| SWI4xSWI6    | 353 | 586 | 462 | 257 | 372 | 355  | 449 |
| SWI4xUGA3    | 126 | 66  | 71  | 63  | 85  | 163  | 93  |
| SWI4xBBP1    | 339 | 352 | 383 | 245 | 407 | 296  | 332 |
| SWI4xYDR026C | 204 | 182 | 139 | 124 | 132 | 185  | 148 |
| SWI4xYLL054C | 28  | 24  | 28  | 26  | 19  | 75   | 21  |
| SWI5xYLL054C | 62  | 36  | 39  | 71  | 52  | 137  | 65  |
| SWI6xUGA3    | 99  | 61  | 57  | 62  | 81  | 135  | 71  |
| SWI6xYDR026C | 150 | 182 | 130 | 136 | 133 | 185  | 135 |
| TBF1xTYE7    | 179 | 328 | 202 | 133 | 193 | 253  | 190 |
| TBF1xYDR026C | 144 | 129 | 105 | 128 | 248 | 155  | 135 |
| TBF1xYPL230W | 538 | 541 | 557 | 610 | 629 | 645  | 623 |
| TBF1xYRR1    | 17  | 1   | 7   | 9   | 24  | 9    | 15  |
| TEC1xUPC2    | 369 | 526 | 434 | 323 | 266 | 300  | 508 |
| TEC1xYER130C | 61  | 56  | 55  | 52  | 58  | 61   | 39  |
| TYE7xUGA3    | 39  | 87  | 25  | 67  | 57  | 163  | 59  |
| TYE7xUME6    | 125 | 44  | 68  | 109 | 79  | 182  | 124 |
| TYE7xYDR026C | 172 | 152 | 115 | 154 | 166 | 255  | 171 |
| TYE7xYDR520C | 25  | 40  | 6   | 24  | 7   | 15   | 22  |
| TYE7xYER184C | 246 | 387 | 247 | 186 | 304 | 411  | 361 |
| TYE7xYJL103C | 415 | 558 | 192 | 517 | 358 | 609  | 399 |
| TYE7xYLL054C | 21  | 29  | 5   | 43  | 49  | 93   | 27  |
| TYE7xYRM1    | 188 | 438 | 209 | 215 | 231 | 316  | 269 |
| TYE7xYRR1    | 11  | 5   | 9   | 7   | 6   | 22   | 15  |
| UGA3xYER184C | 144 | 88  | 89  | 124 | 70  | 192  | 129 |



|                  |      |     |     |      |      |      |      |
|------------------|------|-----|-----|------|------|------|------|
| UGA3xYJL103C 223 | 123  | 71  | 290 | 104  | 335  | 151  |      |
| UGA3xYLL054C 16  | 3    | 2   | 9   | 21   | 75   | 15   |      |
| UGA3xYPL230W     | 266  | 124 | 118 | 374  | 187  | 458  | 175  |
| UME6xYDR026C     | 69   | 20  | 30  | 92   | 44   | 110  | 64   |
| UME6xYER184C140  | 41   | 82  | 91  | 102  | 195  | 139  |      |
| UME6xYLL054C 20  | 4    | 9   | 31  | 10   | 58   | 10   |      |
| UME6xYPL230W     | 280  | 61  | 115 | 325  | 178  | 409  | 274  |
| UME6xYPR196W     | 73   | 24  | 62  | 79   | 68   | 93   | 98   |
| UME6xZMS1 132    | 64   | 99  | 164 | 90   | 233  | 207  |      |
| USV1xZMS1 18     | 12   | 24  | 22  | 11   | 26   | 32   |      |
| XBP1xYBL054W 412 | 516  | 350 | 191 | 416  | 356  | 373  |      |
| YAP3xYAP7 194    | 34   | 87  | 215 | 118  | 117  | 111  |      |
| YBL054WxYLL054C  | 12   | 30  | 21  | 17   | 19   | 123  | 31   |
| YDR026CxYER130C  | 43   | 23  | 17  | 48   | 34   | 52   | 24   |
| YDR026CxYER184C  | 235  | 199 | 167 | 150  | 289  | 313  | 233  |
| YDR026CxYJL103C  | 384  | 244 | 187 | 437  | 330  | 474  | 270  |
| YDR026CxYLL054C  | 18   | 14  | 10  | 35   | 35   | 50   | 18   |
| YDR026CxYPL230W  | 469  | 290 | 216 | 561  | 440  | 617  | 376  |
| YDR026CxZMS1 182 | 225  | 170 | 194 | 240  | 273  | 229  |      |
| YDR520CxZMS1 28  | 29   | 26  | 42  | 34   | 33   | 44   |      |
| YER130CxYPL230W  | 214  | 74  | 74  | 242  | 129  | 264  | 154  |
| YER130CxZMS1 94  | 68   | 84  | 110 | 85   | 128  | 99   |      |
| YER184CxYJL103C  | 788  | 639 | 544 | 696  | 689  | 974  | 788  |
| YER184CxYLL054C  | 59   | 37  | 31  | 21   | 62   | 117  | 47   |
| YER184CxYPL230W  | 926  | 688 | 729 | 792  | 857  | 1233 | 907  |
| YER184CxYRM1 267 | 385  | 465 | 208 | 374  | 524  | 506  |      |
| YER184CxZMS1 441 | 579  | 567 | 317 | 448  | 574  | 629  |      |
| YJL103CxYLL054C  | 77   | 41  | 21  | 80   | 52   | 181  | 59   |
| YJL103CxYPL230W  | 1519 | 857 | 680 | 2136 | 1090 | 1963 | 1070 |
| YJL103CxYPR196W  | 493  | 522 | 404 | 522  | 468  | 605  | 504  |
| YJL103CxYRM1 432 | 514  | 461 | 586 | 471  | 846  | 623  |      |
| YJL103CxZMS1 683 | 684  | 503 | 828 | 638  | 888  | 766  |      |
| YKL222CxYRM1 17  | 10   | 10  | 13  | 9    | 23   | 9    |      |
| YLL054CxYPL230W  | 80   | 55  | 39  | 113  | 71   | 232  | 72   |
| YLL054CxZMS1 42  | 65   | 43  | 56  | 38   | 152  | 66   |      |

|              |     |      |     |      |     |      |      |
|--------------|-----|------|-----|------|-----|------|------|
| YPL230WxZMS1 | 916 | 1050 | 903 | 1124 | 930 | 1425 | 1158 |
| YPR196WxYRM1 | 198 | 404  | 399 | 207  | 318 | 356  | 389  |
| YRM1xZMS1    | 230 | 498  | 461 | 310  | 396 | 480  | 547  |

**Supplemental Table S3.**

Figure 3 gene names (in order, top to bottom)

Top Panel

Ngr1 x Sut1 Combination Target Genes (UPPER)

YPR091C  
YEL063C  
YDR373W  
YDR372C  
YJR094W-A  
YKR027W  
YJL104W  
YMR158W-B  
YBR166C  
YKL138C-A  
YLR061W  
YPR007C  
tS (UGA) P  
YHR055C  
YPR092W  
YPR008W  
YMR160W  
YFL037W  
YPR072W  
snR51  
snR70  
YBR167C

Nrg1-only Target Genes (LOWER)

YOR074C  
YOR075W  
YBR008C  
YJR095W  
YOR073W-A  
RUF20  
YFL004W  
YPR190C  
YBR009C  
YEL003W  
YBR010W  
YBR058C-A  
YFL026W  
YFL027C  
YDR056C  
YDR057W  
YDR039C  
snR63  
YBR058C  
YPL189C-A  
YPL189W

YMR319C

Bottom Panel

Nrg1 x Sut1 Combination Target Genes (UPPER)

YPR007C  
YPR091C  
tS (UGA) P  
snR51  
YDR373W  
YDR372C  
snR70  
YFL037W  
YKL138C-A  
YLR061W  
YPR008W  
YMR158W-B  
YJL104W  
YKR027W  
YBR167C  
YPR092W  
YPR072W  
YMR160W  
YHR055C  
YEL063C  
YJR094W-A  
YBR166C

Sut1-only Target Genes (LOWER)

YOR216C  
YJL200C  
YJL144W  
YHL034C  
YPL056C  
YMR193W  
YPR156C  
YNL117W  
YGR270C-A  
YIR024C  
YER060W-A  
YCR088W  
YHL050W-A  
YAL069W  
YGR097W  
YGR129W  
YDR070C  
YKR090W  
YJL141C  
YFR040W  
YOR109W  
YHR007C-A

**Supplemental Table S4.**

FIGURE 4 GENE NAMES (in order, top to bottom)

Top Panel

Gcn4 x Rtg3 Combination Target Genes (UPPER)

YNL142W  
YNL143C  
YDR051C  
YJL136C  
YJL135W  
YHR060W  
YGR161C  
YPL021W  
YNL187W  
YMR159C  
YMR160W  
YJR090C  
YMR158C-A  
YPL179W  
YPL127C  
YNL078W  
YMR075C-A  
YDL053C  
YJR094W-A  
YFL039C  
LSR1  
YIL117C  
YHR152W  
YHR151C  
YDL054C  
YBR008C  
YPL156C  
YJL134W  
YMR158W-B

Gcn4-only Target Genes (LOWER)

YDL170W  
YDL171C  
YPL273W  
YLL027W  
YGR193C  
YMR175W-A  
YNL228W  
YHR063C  
YOL058W  
YMR174C  
YNL174W

YOR282W  
YLR169W  
YHR098C  
YKR014C  
YPL260W  
YPR008W  
YPL250C  
YBL049W  
RPR1  
YDR363W  
YMR105C  
YPR184W  
YIL135C  
tR (UCU) B  
YDR135C  
YMR172C-A  
YJR151W-A  
YDR378C

Bottom Panel

Gcn4 x Rtg3 Combination Target Genes (UPPER)

YJR094W-A  
YJL134W  
LSR1  
YPL127C  
YMR075C-A  
YJR090C  
YMR158C-A  
YHR060W  
YPL021W  
YFL039C  
YDL053C  
YDL054C  
YHR152W  
YHR151C  
YPL179W  
YIL117C  
YJL136C  
YJL135W  
YPL156C  
YNL187W  
YDR051C  
YBR008C  
YNL142W  
YNL143C  
YNL078W  
YMR159C  
YMR160W  
YGR141C  
YMR158W-B

Rtg3-only Target Genes (LOWER)

YHR056W-A

YDR366C

YLR458W

YML081W

YEL009C-A

YDR302W

YDR070C

YBL058W

YMR253C

YLP298C

YHR050W-A

YIL047C

YPR046W

tS (AGA) M

YGR024C

YPR194C

YER065C

YDR342C

YIR029W

YDR507C

YMR097C

YDR319C

YLR033W

YMR133W

YKR098C

YNL252C

YNL112W

YDR214W

YHR039C

Supplementary Table S5. 81 CRE pairs with significant ( $P < 0.05$ ) rewiring

| Pair       | P-value |
|------------|---------|
| ABF1xHAC1  | 0.0114  |
| ABF1xRPN4  | 0.0264  |
| ABF1xSTB1  | 0       |
| AFT2xCAT8  | 0.011   |
| AFT2xMIG1  | 0.0327  |
| AFT2xZMS1  | 0.0037  |
| ARG80xGCN4 | 0.0197  |
| CAT8xUME6  | 0.037   |
| CBF1xCRZ1  | 0.0013  |
| CBF1xPHD1  | 0       |
| CRZ1xSTP1  | 0.002   |
| CRZ1xSUT1  | 0.037   |
| CRZ1xTYE7  | 0.0112  |
| DAL80xGAT1 | 0.0001  |
| DAL80xGLN3 | 0.0036  |
| DAL80xGZF3 | 0.0009  |
| DAL82xPHD1 | 0.0015  |
| EDS1xHSF1  | 0.0137  |
| EDS1xMBP1  | 0.0016  |
| EDS1xPBF2  | 0.0109  |
| FKH1xSTB1  | 0.0036  |
| FKH1xSWI4  | 0.0011  |
| FKH1xSWI6  | 0.0013  |
| FKH2xSTB1  | 0.0111  |
| FKH2xSWI4  | 0       |
| FKH2xSWI6  | 0.0013  |
| GIS1xMIG3  | 0.0015  |
| GIS1xNRG1  | 0.0001  |
| GIS1xRDS2  | 0.0048  |
| GIS1xSTP1  | 0.0166  |
| GIS1xSUT1  | 0.0122  |
| HAC1xSWI6  | 0.0022  |
| HAP1xZMS1  | 0.0258  |
| HAP2xRSC3  | 0.013   |
| MBP1xREB1  | 0.0199  |
| MBP1xSTB1  | 0.0315  |
| MBP1xSWI6  | 0.0018  |
| MET32xPHO4 | 0.0093  |
| MIG1xPDR1  | 0.0001  |
| MIG1xRCS1  | 0.0004  |
| MIG1xRPH1  | 0.007   |
| MIG1xSTP1  | 0       |
| MIG1xSTP2  | 0       |
| MIG1xUME6  | 0.002   |
| MIG3xMSN4  | 0.0434  |
| MIG3xPDR1  | 0       |
| MIG3xRGM1  | 0.0011  |



|              |        |
|--------------|--------|
| MIG3xSTB5    | 0.0001 |
| MIG3xSTP1    | 0.0004 |
| MIG3xSTP2    | 0.0255 |
| MIG3xUME6    | 0.0196 |
| MIG3xYER130C | 0.0045 |
| MIG3xYPL230W | 0.002  |
| MIG3xZMS1    | 0.0014 |
| MSN2xYDR026C | 0.0197 |
| MSN2xYJL103C | 0.0161 |
| NRG1xRGM1    | 0      |
| NRG1xYPL230W | 0.0004 |
| NRG1xZMS1    | 0      |
| PBF1xSTB3    | 0.0012 |
| PHD1xPHO4    | 0      |
| PHD1xSUT1    | 0.0016 |
| PHD1xYER184C | 0.0022 |
| PHD1xYJL103C | 0.0026 |
| RDS2xRGM1    | 0.0047 |
| RDS2xYPL230W | 0.0044 |
| REB1xSTB3    | 0.0024 |
| RGM1xSTP1    | 0.0181 |
| RGM1xSUT1    | 0.0153 |
| RPH1xZMS1    | 0.0002 |
| RPN4xYDR026C | 0.0303 |
| STB2xSWI6    | 0.001  |
| STB3xYBL054W | 0.0003 |
| STP1xYER184C | 0.0045 |
| STP1xYJL103C | 0.0107 |
| STP1xYPL230W | 0.0161 |
| SUT1xUME6    | 0.0012 |
| SUT1xYER184C | 0.0004 |
| SUT1xYJL103C | 0.0001 |
| SUT1xYPL230W | 0.0121 |
| SWI4xSWI6    | 0.0017 |

Supplemental Table S6: GO pathway enrichment of significantly rewired CRE combinations (p<0.01)

| CRE Pair       | <i>S. cerevisiae</i> Pathway                         | Conserved Pathway                                         | <i>S. bayanus</i> Pathway                       |
|----------------|------------------------------------------------------|-----------------------------------------------------------|-------------------------------------------------|
| ABF1x<br>HAC1  | poly(A)+ mRNA export from nucleus                    | protein O-linked glycosylation                            | isoprenoid biosynthetic process                 |
| ABF1x<br>RPN4  |                                                      | proteasomal ubiquitin-dependent protein catabolic process | chromatin silencing                             |
| ABF1x<br>STB1  |                                                      | spindle pole body separation                              | mitotic spindle organization in nucleus         |
| AFT2x<br>CAT8  | nitrogen catabolite activation of transcription      |                                                           | activation of Rab GTPase activity               |
| AFT2x<br>MIG1  | histone demethylation                                | oxidation-reduction process                               | positive regulation of translational elongation |
| AFT2x<br>ZMS1  | histone demethylation                                | positive regulation of translational elongation           | leukotriene biosynthetic process                |
| ARG80x<br>GCN4 | negative regulation of actin filament polymerization | arginine biosynthetic process                             | lysine biosynthetic process                     |
| CAT8x<br>UME6  | phenylalanyl-tRNA aminoacylation                     | ATP synthesis coupled proton transport                    | regulation of ergosterol biosynthetic process   |
| CBF1x<br>CRZ1  | cysteine biosynthetic process via cystathionine      | glutathione biosynthetic process                          | ammonium transport                              |
| CBF1x<br>PHD1  | regulation of nitrogen utilization                   | ER-associated protein catabolic process                   | positive regulation of translational elongation |
| CRZ1x<br>STP1  | thiamine transport                                   |                                                           | uridine transport                               |
| CRZ1x<br>SUT1  | nitrogen catabolite activation of transcription      | tricarboxylic acid cycle                                  | cellular response to hypoxia                    |
| CRZ1x<br>TYE7  | cysteine biosynthetic process via cystathionine      |                                                           | telomere maintenance via telomerase             |
| DAL80xG<br>AT1 | gamma-aminobutyric acid transport                    | nitrogen catabolite repression of transcription           | leucine biosynthetic process                    |
| DAL80xG<br>LN3 | gamma-aminobutyric acid transport                    | nitrogen catabolite repression of transcription           | leucine biosynthetic process                    |
| DAL80xG<br>ZF3 | gamma-aminobutyric acid transport                    | nitrogen catabolite repression of transcription           | adenine catabolic process                       |
| DAL82xP<br>HD1 | rRNA pseudouridine synthesis                         |                                                           | lagging strand elongation                       |
| EDS1x<br>MBP1  | positive regulation of histone acetylation           | tRNA-type intron splice site recognition and cleavage     | glycolysis                                      |
| EDS1x<br>PBF2  | box H/ACA snoRNP assembly                            | ribosomal large subunit biogenesis                        | rRNA processing                                 |
| FKH1x<br>STB1  | premeiotic DNA replication                           |                                                           | cellular response to heat                       |
| FKH1x<br>SWI4  | premeiotic DNA replication                           | mitotic chromosome condensation                           | telomere capping                                |
| FKH1x<br>SWI6  | premeiotic DNA replication                           | mitotic chromosome condensation                           | telomere capping                                |

|                      |                                                             |                                                                                         |                                                                           |
|----------------------|-------------------------------------------------------------|-----------------------------------------------------------------------------------------|---------------------------------------------------------------------------|
| FKH2x<br>STB1        | premeiotic DNA replication                                  | mitotic chromosome condensation                                                         | telomere capping                                                          |
| FKH2x<br>SWI4        | premeiotic DNA replication                                  | mitotic chromosome condensation                                                         | telomere capping                                                          |
| FKH2x<br>SWI6        | premeiotic DNA replication                                  | mitotic chromosome condensation                                                         | telomere capping                                                          |
| GIS1x<br>MIG3        | protein monoubiquitination                                  | glycogen biosynthetic process                                                           | energy reserve metabolic process                                          |
| GIS1x<br>RDS2        | regulation of translational fidelity                        |                                                                                         | negative regulation of sphingolipid biosynthetic process                  |
| GIS1x<br>STP1        | uridine transport                                           | TOR signaling cascade                                                                   | regulation of fungal-type cell wall 1,3-alpha-glucan biosynthetic process |
| GIS1x<br>SUT1        | uridine transport                                           | glycogen biosynthetic process                                                           | thiamine transport                                                        |
| HAC1x<br>SWI6        | proline biosynthetic process                                | dolichol-linked oligosaccharide biosynthetic process                                    | protein import into peroxisome matrix, receptor recycling                 |
| HAP2x<br>RSC3        | mitochondrial magnesium ion transport                       | heme transport                                                                          | uridine transport                                                         |
| MBP1x<br>REB1        | tryptophan biosynthetic process                             | chitin biosynthetic process                                                             | nucleotide-sugar transport                                                |
| MBP1x<br>STB1        | regulation of establishment or maintenance of cell polarity | negative regulation of ubiquitin-protein ligase activity involved in mitotic cell cycle | DNA repair                                                                |
| MBP1x<br>SWI6        | post-Golgi vesicle-mediated transport                       | negative regulation of ubiquitin-protein ligase activity involved in mitotic cell cycle | GDP-mannose biosynthetic process                                          |
| MET32xP<br>HO4       | threonine biosynthetic process                              | glutathione biosynthetic process                                                        | drug transmembrane transport                                              |
| MIG1x<br>PDR1        | disaccharide catabolic process                              | sporulation resulting in formation of a cellular spore                                  | glycolysis                                                                |
| MIG1x<br>RCS1        | histone demethylation                                       | nucleotide-excision repair, DNA incision, 3'-to lesion                                  |                                                                           |
| MIG1x<br>STP1        | cellular respiration                                        | acetyl-CoA catabolic process                                                            |                                                                           |
| MIG1x<br>STP2        | cellular respiration                                        |                                                                                         | inositol biosynthetic process                                             |
| MIG1x<br>UME6        | vacuole inheritance                                         | acetyl-CoA catabolic process                                                            | hydrogen peroxide catabolic process                                       |
| MIG3x<br>MSN4        | UDP-glucose metabolic process                               | glycogen biosynthetic process                                                           | energy reserve metabolic process                                          |
| MIG3x<br>RGM1        | protein monoubiquitination                                  | glycogen biosynthetic process                                                           | energy reserve metabolic process                                          |
| MIG3x<br>STB5        | glycosphingolipid biosynthetic process                      |                                                                                         | activation of Rab GTPase activity                                         |
| MIG3x<br>STP1        | cellular respiration                                        | acetyl-CoA catabolic process                                                            |                                                                           |
| MIG3x<br>STP2        | cellular respiration                                        |                                                                                         | inositol biosynthetic process                                             |
| MIG3x<br>YPL230<br>W | protein monoubiquitination                                  | glycogen biosynthetic process                                                           | energy reserve metabolic process                                          |

|                      |                                                             |                                                                                         |                                                                                          |
|----------------------|-------------------------------------------------------------|-----------------------------------------------------------------------------------------|------------------------------------------------------------------------------------------|
| MIG3x<br>ZMS1        | protein monoubiquitination                                  | glycogen biosynthetic process                                                           |                                                                                          |
| MSN2x<br>YDR026C     | oxidation-reduction process                                 | early endosome to Golgi transport                                                       | cell shape checkpoint                                                                    |
| MSN2x<br>YJL103C     | proteasome regulatory particle assembly                     | tricarboxylic acid cycle                                                                | phosphatidylinositol biosynthetic process                                                |
| PHD1x<br>PHO4        | phosphate transport                                         | tricarboxylic acid cycle                                                                | positive regulation of translational elongation                                          |
| PHD1x<br>SUT1        | diadenosine polyphosphate catabolic process                 | mitochondrial electron transport, ubiquinol to cytochrome c                             | mitochondrial fusion                                                                     |
| PHD1x<br>YER184C     | fatty acid oxidation                                        |                                                                                         | glycogen biosynthetic process                                                            |
| PHD1x<br>YJL103C     | fatty acid oxidation                                        |                                                                                         | ammonium transport                                                                       |
| RDS2x<br>YPL230<br>W | regulation of translational fidelity                        |                                                                                         | negative regulation of sphingolipid biosynthetic process                                 |
| REB1x<br>STB3        | translational termination                                   | regulation of translational initiation                                                  | rRNA processing                                                                          |
| RGM1x<br>STP1        | uridine transport                                           | TOR signaling cascade                                                                   | regulation of fungal-type cell wall 1,3-alpha-glucan biosynthetic process                |
| RGM1x<br>SUT1        | uridine transport                                           | glycogen biosynthetic process                                                           | thiamine transport                                                                       |
| RPH1x<br>ZMS1        | pentose-phosphate shunt, oxidative branch                   |                                                                                         | proteasome regulatory particle assembly                                                  |
| RPN4x<br>YDR026C     | ATP synthesis coupled proton transport                      |                                                                                         | negative regulation of transcription from RNA polymerase II promoter in response to iron |
| STB2x<br>SWI6        | septin checkpoint                                           | DNA replication                                                                         | dolichol-linked oligosaccharide biosynthetic process                                     |
| STP1x<br>YER184C     | hydrogen peroxide catabolic process                         | cellular respiration                                                                    | ATP-dependent chromatin remodeling                                                       |
| STP1x<br>YJL103C     | hydrogen peroxide catabolic process                         | cellular respiration                                                                    | leucine biosynthetic process                                                             |
| STP1x<br>YPL230<br>W | uridine transport                                           | TOR signaling cascade                                                                   | regulation of fungal-type cell wall 1,3-alpha-glucan biosynthetic process                |
| SUT1x<br>UME6        | vacuole inheritance                                         | ATP synthesis coupled proton transport                                                  | phosphate transport                                                                      |
| SUT1xYE<br>R184C     | positive regulation of cell cycle                           | tricarboxylic acid cycle                                                                | plasmid maintenance                                                                      |
| SUT1xYJ<br>L103C     | positive regulation of cell cycle                           | tricarboxylic acid cycle                                                                |                                                                                          |
| SUT1x<br>YPL230<br>W | uridine transport                                           | glycogen biosynthetic process                                                           | thiamine transport                                                                       |
| SWI4x<br>SWI6        | regulation of establishment or maintenance of cell polarity | negative regulation of ubiquitin-protein ligase activity involved in mitotic cell cycle |                                                                                          |

## Supplemental Figures

Figure S1. Phylogenetic screen identifies co-occurring CREs with spacing bias. **A)** If CREs are independent then there is uniform probability of any particular distance separating the two CREs. However, there are a greater number of chances to observe shorter distances than longer distances. Therefore, as depicted in the histogram, the expected number of observations decreases linearly as the distance between CREs increases. **B)** If CREs cluster near each other, then this non-random distribution is observed in addition to the random expectation. This results in a deviation from the random expectation at short distances.

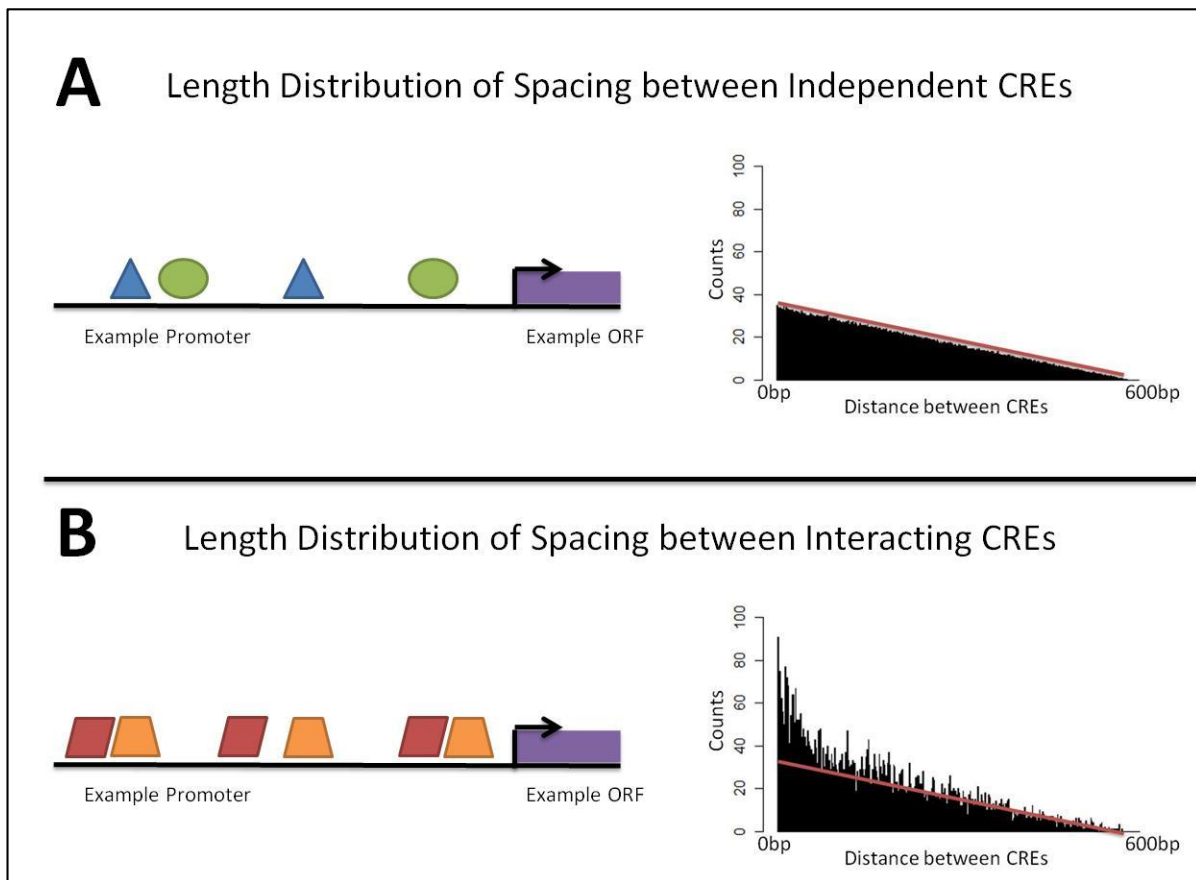

Figure S2 Enrichment ratios are depicted as a heat map for each replicate in *SWI6::myc* and *SWI6::myc/swi4Δ* ChIP experiments. Enrichment ratio is calculated as the normalized number of reads that aligned to promoter in the IP sample in ratio to normalized number of reads that aligned to that same promoter in the INPUT sample. The top heat map shows that Swi6 occupancy is significantly lower in the *swi4Δ* than the wild-type strain for Swi6 targets that are also bound by Swi4 in wild-type cells (p-value <2e-5). The lower heat map shows no significant trend in Swi6 occupancy for targets that are not bound by Swi4 in wild-type cells (p-value = 0.27). Enrichment ratios are depicted as a heat map for each replicate in *SWI4::myc* and *SWI4::myc/swi6Δ* ChIP experiments. The top heat map shows that Swi4 occupancy is generally independent of *SWI6* for Swi4 targets that are also bound by Swi6 in wild-type cells (p-value = 0.016). The lower heat map also shows no significant trend in Swi4 occupancy (p-value = 0.93).

A.

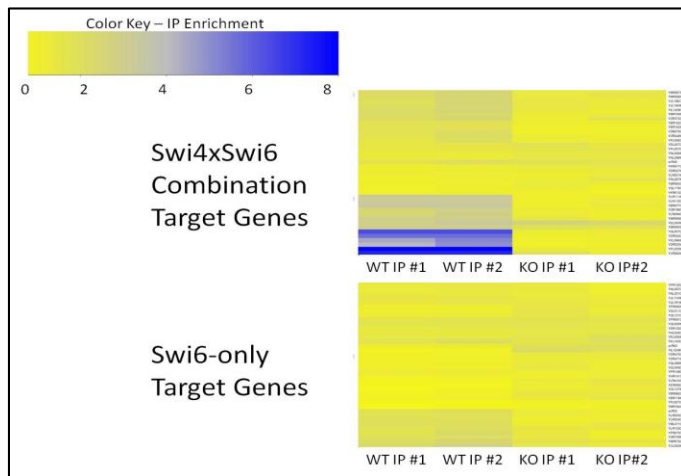

B.

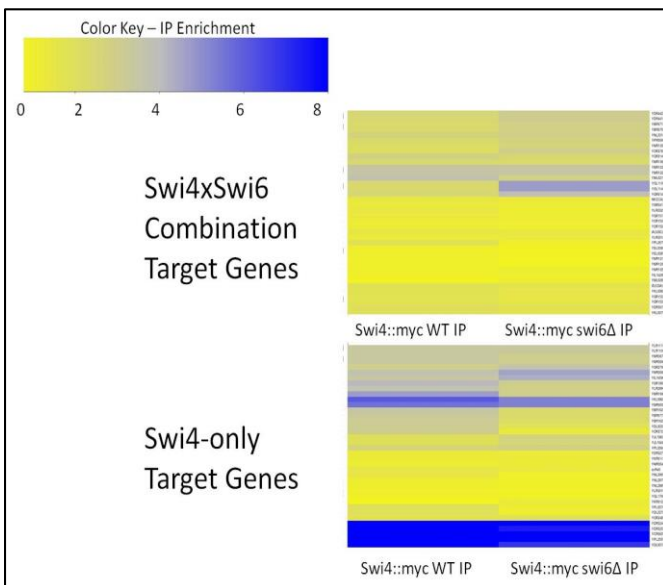

Figure S3. Heat Maps for the most definitive examples of CRE combination rewiring.

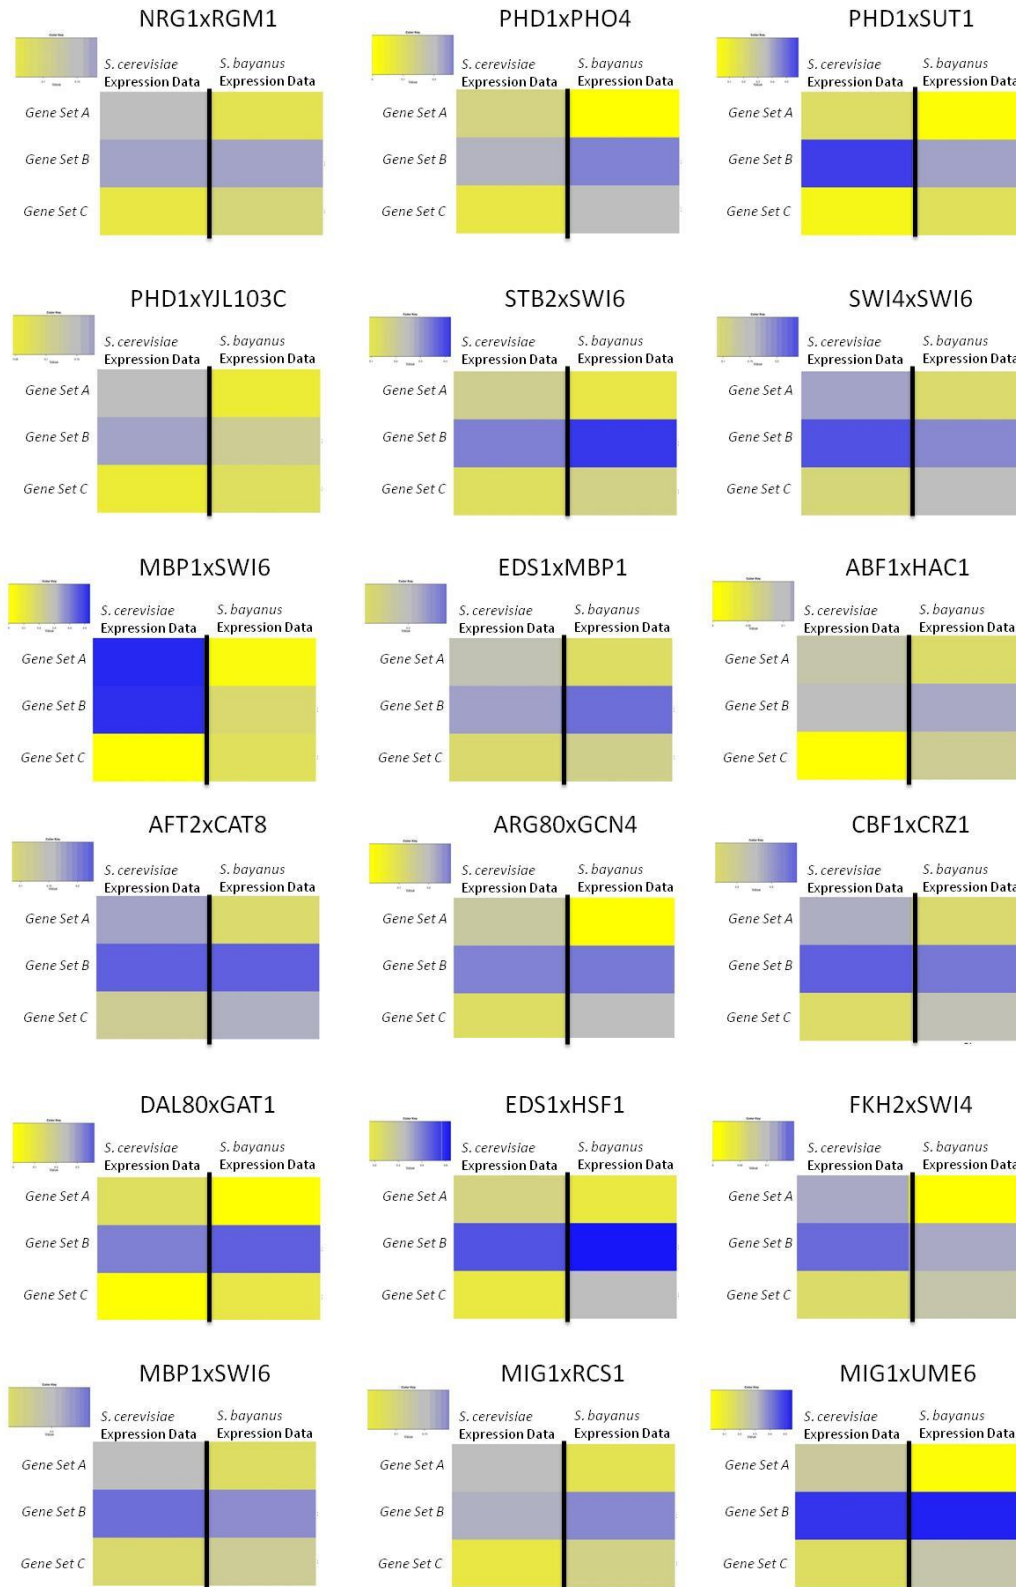

Supplement: 024331_024331si.pdf [file 024331_024331si.pdf]
