# Supplementary material for: Combinatorial Cis-regulation in Saccharomyces Species
Source: Oxford University Press journal article supplement (doi:10.1534/g3.115.024331), 2016-01-26
Supplement: 024331_figures3.pdf [file 024331_figures3.pdf]

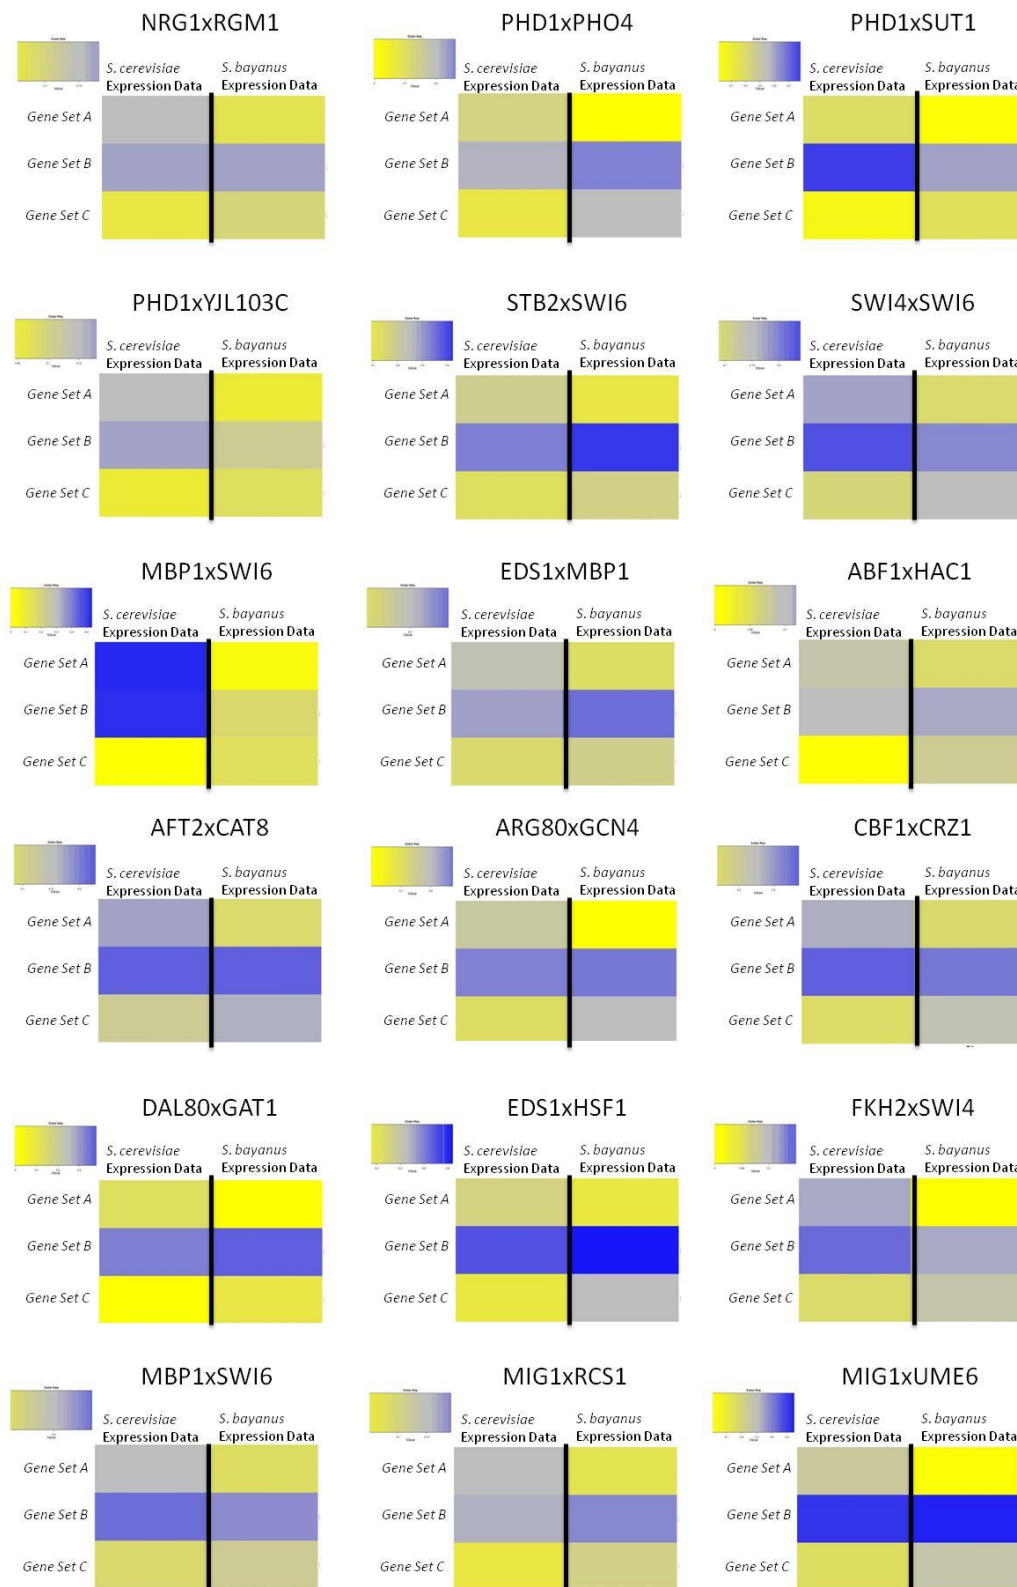

Figure S3. Heat Maps for the most definitive examples of CRE combination rewiring.
