# Supplementary material for: Combinatorial Cis-regulation in Saccharomyces Species
Source: Oxford University Press journal article supplement (doi:10.1534/g3.115.024331), 2016-01-26
Supplement: 024331_tables1.zip [file 024331_tables1.zip]

Table S1. CRE combinations and supporting experimental evidence. Literature reference provided for datasets that indicate significant interaction between CREs (p-value <0.01). ‘Ref’ column provides reference for known interactions mentioned in the main text. References listed here are provided at the end of the Table. (Data also available in TableS1.xls)

| Pair       | ChIP           | Path      | Expression          | Orient    | Ref  |
|------------|----------------|-----------|---------------------|-----------|------|
| ABF1xCBF1  | (27) (26)      | (35)      | (31) (32)           |           |      |
| ABF1xUME6  | (27)           | (34)      | (32)                |           |      |
| AFT2xRAP1  | (27)           | (34) (35) | (29)                |           |      |
| AFT2xRCS1  | (27)           | (34) (35) | (31) (32)           | (29)      |      |
| AFT2xSFP1  | (27)           | (34) (35) | (29) (30)           | (30)      |      |
| ARG80xBAS1 | (27) (26)      | (34) (35) | (29) (30) (31) (32) |           |      |
| ARG80xGCN4 | (27) (26)      | (34) (35) | (29) (30) (31)      |           | (49) |
| ARG80xSUT1 | (27)           | (34) (35) | (29) (31) (32)      |           |      |
| ARG81xBAS1 | (27) (26)      | (34)      | (30) (31)           |           |      |
| ARG81xGCN4 | (27) (26)      | (34)      | (29)                | (29)      |      |
| BAS1xGCN4  | (27) (26) (28) | (34) (35) | (29) (32)           |           | (50) |
| BAS1xRTG3  | (27) (26)      | (34) (35) | (29) (31) (32)      |           |      |
| CAD1xYAP7  | (27)           | (34)      | (30)                |           |      |
| CBF1xGCN4  | (27)           | (34) (35) | (29) (30) (31) (32) |           |      |
| CBF1xINO2  | (27) (26)      | (34)      | (31)                | (30)      |      |
| CBF1xINO4  | (27) (26)      | (34) (35) | (31)                |           |      |
| CBF1xMET32 | (27)           | (34) (35) | (29) (30) (31)      |           | (58) |
| CBF1xMET4  | (27) (26)      | (34) (35) | (29) (30) (31)      |           |      |
| CIN5xMIG3  | (27)           | (35)      | (30) (31)           |           |      |
| CUP9xRAP1  | (27) (26)      | (35)      | (32)                |           |      |
| DAL82xUME6 | (27)           | (34)      | (29)                |           |      |
| DIG1xSTE12 | (27) (26) (28) | (34)      | (29) (31)           |           | (44) |
| EDS1xHSF1  | (27)           | (34)      | (31)                | (29)      |      |
| FHL1xRAP1  | (27) (26) (28) | (34) (35) | (29) (30)           |           | (42) |
| FHL1xRPH1  | (27) (26) (28) | (35)      | (29)                |           |      |
| FHL1xSFP1  | (27) (26) (28) | (34) (35) | (29) (30) (31)      | (30) (29) | (43) |
| FKH1xFKH2  | (27) (26) (28) | (34)      | (32)                |           |      |
| FKH1xMBP1  | (27) (26)      | (34)      | (29) (30) (31) (32) |           | (48) |
| FKH1xMCM1  | (27) (26)      | (35)      | (30)                |           | (56) |
| FKH1xSWI6  | (27) (26)      | (34)      | (29) (30) (31)      | (29)      | (47) |
| FKH2xMBP1  | (27) (26)      | (34) (35) | (29) (30) (31)      |           |      |
| FKH2xMCM1  | (27) (26)      | (35)      | (30)                |           | (56) |

|            |                |           |                     |           |      |
|------------|----------------|-----------|---------------------|-----------|------|
| FKH2xSTB1  | (27) (26)      | (34)      | (29) (30) (31)      | (30) (29) |      |
| FKH2xSWI6  | (27) (26)      | (34)      | (29) (30) (31)      | (29)      |      |
| FZF1xSPT23 | (27)           | (34)      | (29) (32)           | (30) (29) |      |
| GAL4xSTP1  | (28)           | (34) (35) | (32)                |           |      |
| GCN4xLEU3  | (27) (26) (28) | (34) (35) | (30) (31) (32)      |           |      |
| GCN4xRTG3  | (27) (26)      | (34) (35) | (29) (32)           | (30) (29) |      |
| GCR1xGCR2  | (27) (26)      | (34)      | (32)                |           | (60) |
| GCR1xRAP1  | (27) (26) (28) | (34) (35) | (30) (31) (32)      |           | (60) |
| GCR2xTHI2  | (27) (26)      | (34) (35) | (31) (32)           |           |      |
| GLN3xGZF3  | (27)           | (35)      | (32)                |           |      |
| HAP1xPDR1  | (27)           | (35)      | (29) (31)           |           |      |
| HAP1xSUT1  | (27)           | (34)      | (29)                |           |      |
| HAP3xHAP4  | (27) (26)      | (34) (35) | (30) (31)           |           |      |
| HAP3xUGA3  | (26)           | (35)      | (32)                |           |      |
| HAP4xHAP5  | (27) (26)      | (34) (35) | (30) (31)           |           |      |
| HMS1xTYE7  | (27)           | (34)      | (31) (32)           |           |      |
| HSF1xXBP1  | (27)           | (34)      | (29) (30) (31)      |           |      |
| INO2xINO4  | (27) (26) (28) | (34) (35) | (32)                |           | (57) |
| LEU3xSKN7  | (27) (28)      | (35)      | (32)                |           |      |
| LEU3xUME6  | (28)           | (34) (35) | (31) (32)           |           |      |
| MBP1xNDD1  | (27) (26)      | (35)      | (29) (31)           |           |      |
| MBP1xSTB1  | (27) (26)      | (34) (35) | (29) (30) (31) (32) | (30)      | (40) |
| MBP1xSWI4  | (27) (26)      | (34) (35) | (29) (30) (31) (32) | (30)      | (39) |
| MBP1xSWI6  | (27) (26)      | (34) (35) | (29) (30) (31) (32) |           | (39) |
| MCM1xSTE12 | (27) (26)      | (34)      | (29) (30) (31)      |           |      |
| MCM1xSWI4  | (27) (26)      | (34)      | (29) (30) (31) (32) |           |      |
| MCM1xSWI6  | (27) (26)      | (34) (35) | (29) (30) (31) (32) |           |      |
| MET32xMET4 | (27)           | (35)      | (29) (30) (31)      |           |      |
| MET32xTYE7 | (27)           | (34) (35) | (29) (30) (31)      | (30)      |      |
| MIG1xMIG3  | (27)           | (34) (35) | (29) (30) (31)      | (30)      |      |
| MIG1xPHD1  | (27) (26)      | (34) (35) | (30) (31)           |           |      |
| MIG1xRGT1  | (27) (26)      | (35)      | (31)                | (30)      | (51) |
| MIG1xSKN7  | (27) (26)      | (35)      | (30) (31)           |           |      |
| MIG1xSOK2  | (27) (26)      | (35)      | (31) (32)           |           |      |
| MIG1xSUT1  | (27)           | (34) (35) | (29) (30) (31) (32) | (30)      |      |
| MIG2xMOT3  | (27)           | (35)      | (31)                |           |      |
| MIG2xOAF1  | (27)           | (35)      | (30) (31)           |           |      |
| MIG3xMSN4  | (27)           | (34) (35) | (29) (30) (31)      | (30) (29) |      |
| MIG3xNRG1  | (27)           | (34) (35) | (30) (31)           | (30)      |      |
| MIG3xPHD1  | (27)           | (35)      | (29) (31)           |           |      |
| MIG3xRGT1  | (27)           | (35)      | (29) (30) (31)      |           |      |

|              |                |           |                     |           |      |
|--------------|----------------|-----------|---------------------|-----------|------|
| MIG3xSTP1    | (27)           | (34) (35) | (29) (30) (31)      | (29)      |      |
| MIG3xSUT1    | (27)           | (34) (35) | (29) (30) (31)      | (30)      |      |
| MIG3xYPR196W | (27)           | (35)      | (29) (30) (31)      |           |      |
| MOT3xSKN7    | (27)           | (34)      | (29) (32)           |           |      |
| MSN2xPHD1    | (26)           | (34)      | (29) (30) (31)      |           |      |
| MSN2xSKN7    | (27) (28)      | (35)      | (30) (31)           |           |      |
| MSN2xZMS1    | (28)           | (35)      | (29) (30) (31) (32) | (30) (29) |      |
| MSN4xSKN7    | (27)           | (35)      | (30) (31) (32)      |           |      |
| MSN4xXBP1    | (27)           | (35)      | (29) (30) (31) (32) |           |      |
| NDD1xSTB1    | (27) (26)      | (34)      | (29)                |           |      |
| NDD1xSWI6    | (27) (26)      | (34)      | (29) (31)           |           |      |
| NHP6AxPHO2   | (28)           | (34) (35) | (29)                |           |      |
| NRG1xPDR1    | (27) (26)      | (35)      | (30)                |           |      |
| NRG1xRIM101  | (27) (26)      | (35)      | (30) (31) (32)      | (29)      |      |
| OAF1xPDR3    | (27)           | (35)      | (30) (31) (32)      |           | (52) |
| PDR1xZMS1    | (27) (26)      | (34)      | (29) (30) (31)      |           |      |
| PDR3xSTP1    | (27)           | (34)      | (29) (30) (31)      |           |      |
| PHD1xSUT1    | (27)           | (34) (35) | (31) (32)           | (30)      |      |
| RAP1xSFP1    | (27) (26) (28) | (34) (35) | (29) (30) (31) (32) |           |      |
| RAP1xSTP1    | (28)           | (35)      | (32)                |           |      |
| RCS1xSFP1    | (27) (26)      | (34) (35) | (29) (32)           |           |      |
| RDS1xSTP1    | (27)           | (35)      | (30) (31)           |           |      |
| RGM1xRPH1    | (27) (26)      | (35)      | (29) (30) (31) (32) | (30)      |      |
| RGT1xSUT1    | (27)           | (35)      | (30) (31) (32)      | (29)      |      |
| RPH1xZMS1    | (28)           | (34) (35) | (29) (30) (31) (32) | (30)      |      |
| RTG3xSTB5    | (27)           | (34)      | (29) (32)           | (30) (29) |      |
| SKN7xUGA3    | (28)           | (35)      | (29) (31)           |           |      |
| SKN7xZMS1    | (28)           | (35)      | (31)                |           |      |
| SNF1xYBL054W | (27)           | (35)      | (32)                |           |      |
| STB1xSWI4    | (27) (26)      | (34)      | (29) (30) (32)      | (29)      | (41) |
| STB1xSWI6    | (27) (26)      | (34) (35) | (29) (30) (31)      | (30) (29) | (41) |
| STP1xSTP2    | (27) (26)      | (35)      | (30) (31) (32)      |           |      |
| STP1xTHI2    | (27) (26)      | (34) (35) | (29) (32)           |           |      |
| STP1xZMS1    | (28)           | (35)      | (29) (30) (31) (32) |           |      |
| SWI4xSWI6    | (27) (26)      | (34) (35) | (29) (30) (31) (32) | (30) (29) | (39) |
| UME6xZMS1    | (28)           | (34)      | (31)                |           |      |
| ABF1xACA1    |                | (34)      | (32)                |           |      |
| ABF1xBAS1    |                | (34)      | (29) (30) (31) (32) |           |      |
| ABF1xCST6    |                | (35)      | (32)                |           |      |
| ABF1xGCN4    |                | (34) (35) | (29) (30) (31)      |           |      |
| ABF1xHAP5    |                | (34) (35) | (30) (32)           |           |      |

|              |           |           |                     |           |      |
|--------------|-----------|-----------|---------------------|-----------|------|
| ABF1xHSF1    | (27) (26) |           | (30) (32)           |           |      |
| ABF1xINO2    | (27) (26) | (34)      |                     |           |      |
| ABF1xINO4    | (27) (26) | (34)      |                     |           |      |
| ABF1xPHD1    |           | (34)      | (29) (32)           |           |      |
| ABF1xRPN4    |           | (34) (35) | (29) (30) (31) (32) |           |      |
| ABF1xSTB3    |           | (34)      | (29) (30) (31)      | (30) (29) |      |
| ABF1xSWI4    |           | (34)      | (30) (31) (32)      |           |      |
| ABF1xTBF1    |           | (34) (35) | (29)                |           |      |
| ABF1xYPR196W |           | (34)      | (29)                |           |      |
| ACA1xGCN4    |           | (34)      | (29) (32)           | (30) (29) |      |
| ACA1xPHD1    |           | (34)      | (32)                |           |      |
| ACA1xRPN4    |           | (34) (35) | (30) (31) (32)      |           |      |
| ACA1xRTG3    |           | (34)      | (30) (32)           |           |      |
| ACA1xSKN7    |           | (35)      | (32)                | (30) (29) |      |
| ACA1xSTP1    |           | (34)      | (30) (31) (32)      |           |      |
| ACE2xSKN7    | (27) (26) |           | (32)                |           |      |
| ACE2xSWI5    | (27) (26) |           | (29) (32)           |           | (53) |
| AFT2xCBFI    |           | (35)      | (31) (32)           |           |      |
| AFT2xFHL1    |           | (34) (35) | (29)                | (30) (29) |      |
| AFT2xMIG1    | (27)      |           | (29) (31) (32)      |           |      |
| AFT2xRPH1    | (27)      |           | (32)                |           |      |
| AFT2xRPN4    | (27)      |           | (32)                |           |      |
| AFT2xTYE7    |           | (35)      | (31)                |           |      |
| AFT2xYJL103C |           | (35)      | (32)                |           |      |
| ARG80xMIG1   |           | (34)      | (31)                |           |      |
| ARG80xMIG3   | (27)      |           | (29) (30) (31)      |           |      |
| ARG81xMIG3   | (27)      |           | (31)                |           |      |
| ARG81xPHO4   |           | (34)      | (31)                |           |      |
| ARG81xRTG3   | (27) (26) |           | (29) (30)           |           |      |
| ARG81xSKN7   |           | (34)      | (31)                |           |      |
| ARG81xSTP1   | (27) (26) |           | (29) (30) (31)      |           |      |
| ARO80xCST6   | (27)      |           | (32)                |           |      |
| ARO80xPDR1   | (27) (26) |           | (29)                |           |      |
| ARO80xPDR3   | (27)      |           | (32)                |           |      |
| ARO80xSTP1   | (27) (26) |           | (30)                |           |      |
| ASH1xMBP1    | (27) (26) |           | (32)                |           |      |
| ASH1xNDD1    | (27) (26) |           | (29) (30)           |           |      |
| ASH1xSTP1    | (28)      |           | (32)                |           |      |
| ASH1xSWI6    | (27) (26) |           | (32)                |           |      |
| BAS1xSTP3    |           | (34) (35) | (29) (31)           |           |      |
| CAT8xGAL4    |           | (35)      | (32)                |           |      |

|                    |           |           |                |      |      |
|--------------------|-----------|-----------|----------------|------|------|
| CAT8xGIS1          |           | (35)      | (30) (31)      |      |      |
| CAT8xMIG1          |           | (35)      | (30) (31)      |      |      |
| CAT8xMIG3          |           | (34)      | (29) (30) (31) |      |      |
| CAT8xMSN2          |           | (35)      | (29) (30) (31) |      |      |
| CAT8xMSN4          |           | (35)      | (29) (30) (31) |      |      |
| CAT8xPDR1          |           | (35)      | (30) (31)      |      |      |
| CAT8xPHD1          |           | (35)      | (30) (31) (32) | (29) |      |
| CAT8xRDS1          |           | (35)      | (31)           |      |      |
| CAT8xRGM1          |           | (35)      | (30) (31)      |      |      |
| CAT8xRPH1          |           | (34) (35) | (30) (31)      |      |      |
| CAT8xRSC3          |           | (35)      | (30) (31)      | (30) |      |
| CAT8xRTG3          |           | (35)      | (31) (32)      |      |      |
| CAT8xSTP1          |           | (35)      | (29) (30) (31) |      |      |
| CAT8xSUT1          |           | (35)      | (30) (31)      |      |      |
| CAT8xSWI5          |           | (35)      | (29) (32)      | (30) |      |
| CAT8xUME6          |           | (35)      | (30) (31) (32) |      |      |
| CAT8xYER184C       |           | (35)      | (30) (31)      |      |      |
| CAT8xYPL230W       |           | (35)      | (30) (31)      |      |      |
| CBF1xDAL81         | (27)      |           | (32)           |      |      |
| CBF1xGAT1          |           | (34) (35) | (31) (32)      |      |      |
| CBF1xHAC1          |           | (35)      | (31)           |      |      |
| CBF1xHAP5          | (27)      | (35)      |                |      |      |
| CBF1xMATALPH<br>A2 |           | (34) (35) | (31)           |      |      |
| CBF1xMET28         |           | (34)      | (32)           |      | (58) |
| CBF1xOAF1          |           | (35)      | (32)           |      |      |
| CBF1xPDR8          |           | (35)      | (32)           |      |      |
| CBF1xPHD1          |           | (34)      | (29) (30) (31) |      |      |
| CBF1xPHO4          |           | (34) (35) | (31) (32)      |      |      |
| CBF1xRAP1          |           | (35)      | (32)           |      |      |
| CBF1xRTG3          |           | (34) (35) | (29) (31) (32) |      |      |
| CBF1xSUT1          |           | (34) (35) | (31) (32)      |      |      |
| CBF1xTYE7          | (27)      | (34) (35) |                |      |      |
| CBF1xYER184C       |           | (34) (35) | (32)           |      |      |
| CHA4xRGM1          |           | (34) (35) | (32)           |      |      |
| CIN5xNRG1          | (27) (26) |           | (31)           |      |      |
| CIN5xPDR3          |           | (35)      | (30) (31)      |      |      |
| CIN5xRGT1          | (27) (26) |           | (31) (32)      |      |      |
| CIN5xXBP1          | (27)      |           | (30)           |      |      |
| CRZ1xYJL103C       |           | (35)      | (29) (30) (31) |      |      |
| CST6xSUT1          |           | (35)      | (29) (30) (31) |      |      |

|              |                |           |                     |           |      |
|--------------|----------------|-----------|---------------------|-----------|------|
| CST6xSWI6    |                | (34)      | (32)                |           |      |
| CST6xYER184C |                | (35)      | (31) (32)           | (29)      |      |
| CST6xYJL103C |                | (35)      | (31) (32)           |           |      |
| CUP9xSFP1    |                | (35)      | (29) (30) (32)      |           |      |
| CUP9xSTP1    | (27) (26)      |           | (31) (32)           |           |      |
| DAL80xGLN3   |                | (35)      | (30)                |           |      |
| DAL80xGZF3   | (27)           |           | (30) (32)           |           |      |
| DAL80xHAP1   |                | (35)      | (29)                |           |      |
| DAL82xRDS1   |                | (34)      | (29) (30)           |           |      |
| DAL82xSTP1   | (27)           |           | (29) (30) (31)      | (30) (29) |      |
| EDS1xPBF1    |                | (34)      | (29) (30)           | (30) (29) |      |
| EDS1xPBF2    |                | (34)      | (29) (30) (31)      |           |      |
| EDS1xSTB3    |                | (34)      | (30)                | (30)      |      |
| FHL1xMET31   | (27) (26)      | (35)      |                     |           |      |
| FHL1xMIG1    |                | (35)      | (29)                |           |      |
| FHL1xMIG3    |                | (35)      | (29)                |           |      |
| FHL1xPHO4    |                | (35)      | (29)                |           |      |
| FHL1xRCS1    |                | (35)      | (29)                | (29)      |      |
| FHL1xRSC3    |                | (35)      | (29)                |           |      |
| FKH1xSTB1    |                | (34)      | (29) (30) (31)      | (29)      |      |
| FKH1xSWI4    | (27) (26) (28) |           | (29) (30) (31) (32) | (29)      | (47) |
| FKH2xHCM1    |                | (34)      | (32)                |           |      |
| FKH2xSWI4    | (27) (26) (28) |           | (29) (30) (31) (32) | (29)      |      |
| GAL4xGAL80   | (27)           | (34) (35) |                     |           |      |
| GAL4xPDR1    | (27) (26)      | (35)      |                     |           |      |
| GAL80xMIG3   | (27)           | (34) (35) |                     |           |      |
| GAL80xSTP1   | (27)           |           | (32)                |           |      |
| GAL80xSUT1   |                | (34)      | (32)                |           |      |
| GAT1xGLN3    | (27)           | (35)      |                     | (29)      |      |
| GAT1xGZF3    | (27)           |           | (32)                |           |      |
| GAT1xSIP4    | (27)           |           | (32)                |           |      |
| GAT4xGCR1    |                | (34)      | (31)                |           |      |
| GAT4xLYS14   |                | (34)      | (29)                |           |      |
| GCN4xSTB3    |                | (34) (35) | (29) (30)           |           |      |
| GCN4xTYE7    |                | (34) (35) | (29) (30) (31) (32) |           |      |
| GCR1xSTP2    | (27) (26)      | (34)      |                     |           |      |
| GIS1xMIG1    |                | (34)      | (29) (30) (31)      | (30) (29) |      |
| GIS1xMIG3    |                | (34) (35) | (29) (30) (31)      | (29)      |      |
| GIS1xNHP10   |                | (34)      | (30) (31)           |           |      |
| GIS1xRPH1    |                | (35)      | (29) (30) (31)      | (30)      |      |
| GIS1xSUT1    |                | (34) (35) | (29) (30) (31)      | (29)      |      |

|                    |      |           |                |           |      |
|--------------------|------|-----------|----------------|-----------|------|
| GIS1xYER184C       |      | (34) (35) | (30) (31)      | (30)      |      |
| GIS1xYJL103C       |      | (35)      | (30) (31)      | (30)      |      |
| GSM1xMIG3          |      | (34)      | (30) (31)      |           |      |
| GSM1xSUT1          |      | (34)      | (30) (31)      |           |      |
| HAC1xPHO4          |      | (35)      | (31)           |           |      |
| HAC1xYLL054C       |      | (35)      | (31)           |           |      |
| HAP1xMIG1          |      | (34)      | (29) (31)      | (30)      |      |
| HAP1xPHO4          |      | (34) (35) | (31)           |           |      |
| HAP1xRDS1          |      | (35)      | (31)           |           |      |
| HAP1xSKN7          | (27) | (35)      |                |           |      |
| HAP1xSOK2          |      | (35)      | (31)           |           |      |
| HAP1xTOS8          | (27) | (35)      |                |           |      |
| HAP1xYER184C       |      | (34) (35) | (29)           |           |      |
| HAP1xYJL103C       |      | (34)      | (30)           |           |      |
| HAP2xSUT1          |      | (34) (35) | (30) (31)      |           |      |
| HAP3xMBP1          |      | (34) (35) | (30) (31)      |           |      |
| HAP3xMIG3          | (27) | (34) (35) |                |           |      |
| HAP3xPDR8          |      | (34) (35) | (32)           |           |      |
| HAP3xRDS1          | (27) | (35)      |                |           |      |
| HAP3xSKN7          |      | (35)      | (32)           |           |      |
| HAP3xSUT1          |      | (34) (35) | (29) (31)      |           |      |
| HAP3xZMS1          |      | (34) (35) | (29) (32)      |           |      |
| HAP4xRDS1          | (27) |           | (30) (31)      | (30)      |      |
| HAP4xSKN7          |      | (34) (35) | (32)           |           |      |
| HAP4xSUT1          |      | (34) (35) | (30) (31) (32) | (30) (29) |      |
| HAP5xNHP10         |      | (34) (35) | (30)           |           |      |
| HAP5xRDS1          |      | (34)      | (31)           | (29)      |      |
| HAP5xSKN7          |      | (34) (35) | (30) (31) (32) |           |      |
| HAP5xSUT1          |      | (34) (35) | (30) (31)      |           |      |
| HMRA2xMCM1         |      | (34) (35) | (29)           |           |      |
| HMS1xMIG3          | (27) |           | (29) (31)      |           |      |
| HMS1xNHP10         |      | (34)      | (31)           |           |      |
| HMS1xSOK2          | (26) |           | (32)           |           |      |
| HMS1xSUT1          | (27) |           | (30) (31)      | (30)      |      |
| IME1xPDR3          |      | (35)      | (31)           |           |      |
| IME1xRDS1          | (27) |           | (30)           |           |      |
| IME1xSUT1          |      | (35)      | (30) (31) (32) | (30)      |      |
| IME1xUME6          |      | (34)      | (30)           |           | (46) |
| IME1xYPR196W       |      | (35)      | (30) (31)      |           |      |
| INO2xMATALPH<br>A2 |      | (35)      | (30)           |           |      |

|                  |                |           |                     |           |      |
|------------------|----------------|-----------|---------------------|-----------|------|
| INO2xPDR3        |                | (34)      | (30)                |           |      |
| INO2xRAP1        | (27) (26) (28) | (35)      |                     |           |      |
| INO2xTYE7        |                | (34) (35) | (31)                |           |      |
| INO2xYAP7        |                | (34)      | (29) (30)           |           |      |
| INO4xTYE7        |                | (34) (35) | (29) (31)           |           |      |
| INO4xYAP7        |                | (34)      | (29) (30) (31)      |           |      |
| LEU3xSTP2        | (27)           |           | (32)                |           |      |
| LEU3xSUT1        | (27)           |           | (29) (31) (32)      |           |      |
| LEU3xSWI4        | (28)           |           | (29) (31) (32)      |           |      |
| LYS14xMIG1       |                | (35)      | (29) (30) (31)      |           |      |
| LYS14xPDR3       |                | (35)      | (30) (31)           |           |      |
| LYS14xSTB5       |                | (34)      | (29) (31)           |           |      |
| LYS14xSTE12      |                | (34)      | (31)                | (29)      |      |
| LYS14xYJL103C    |                | (34)      | (29)                |           |      |
| MATALPHA2xMCM1   |                | (34)      | (31)                |           | (54) |
| MATALPHA2xNH P6B |                | (34)      | (29)                |           |      |
| MATALPHA2xSTE12  |                | (34)      | (29)                | (29)      |      |
| MBP1xMCM1        | (27) (26)      |           | (29) (31)           | (30)      |      |
| MBP1xMET28       |                | (34)      | (29)                |           |      |
| MBP1xPHD1        | (27) (26)      |           | (31)                |           |      |
| MBP1xREB1        |                | (34)      | (30)                |           |      |
| MBP1xRTG3        | (27)           |           | (29)                |           |      |
| MBP1xSTB2        |                | (34) (35) | (29) (30) (31) (32) | (30) (29) |      |
| MBP1xUME6        | (27)           | (34)      |                     |           |      |
| MBP1xYDR026C     |                | (34)      | (29) (30) (31) (32) |           |      |
| MCM1xNDD1        | (27) (26)      |           | (29) (30) (31)      |           | (56) |
| MCM1xSTP1        | (27) (26)      |           | (32)                |           |      |
| MCM1xYOX1        | (27)           |           | (29) (30) (31) (32) |           | (55) |
| MET28xSTB1       |                | (34)      | (29) (30) (31) (32) | (29)      |      |
| MET28xSUM1       |                | (34)      | (30) (32)           |           |      |
| MET28xSWI4       |                | (34)      | (29) (31) (32)      |           |      |
| MET28xSWI6       |                | (34)      | (29) (30)           |           |      |
| MET31xMIG3       | (27)           |           | (30) (31)           |           |      |
| MET31xPDR1       | (27) (26)      |           | (29)                |           |      |
| MET31xRPN4       | (27)           | (34) (35) |                     | (30)      |      |
| MET32xPHO4       |                | (34) (35) | (29) (30)           |           |      |
| MET4xRDS1        |                | (35)      | (30)                |           |      |
| MET4xTYE7        |                | (34) (35) | (29) (30) (31)      |           |      |
| MIG1xMSN2        |                | (34) (35) | (29) (30) (31) (32) | (29)      |      |



|              |           |           |                     |           |  |
|--------------|-----------|-----------|---------------------|-----------|--|
| MIG1xMSN4    |           | (34) (35) | (29) (30) (31) (32) | (29)      |  |
| MIG1xNRG1    | (27) (26) |           | (29) (30) (31) (32) |           |  |
| MIG1xPDR1    |           | (34)      | (29) (30) (31)      |           |  |
| MIG1xPHO4    |           | (34) (35) | (29) (31) (32)      |           |  |
| MIG1xRCS1    | (26)      |           | (29) (31) (32)      |           |  |
| MIG1xRDS1    |           | (35)      | (30) (31) (32)      |           |  |
| MIG1xRGM1    |           | (34)      | (29) (30) (31) (32) | (30) (29) |  |
| MIG1xSFP1    |           | (34) (35) | (32)                |           |  |
| MIG1xSTP1    |           | (35)      | (29) (30) (31) (32) |           |  |
| MIG1xSTP2    |           | (35)      | (29) (30) (31)      |           |  |
| MIG1xUGA3    | (27) (26) |           | (31) (32)           |           |  |
| MIG1xYER184C |           | (34)      | (29) (30) (31) (32) |           |  |
| MIG1xYJL103C |           | (34) (35) | (30) (31)           |           |  |
| MIG1xYPL230W |           | (34)      | (29) (30) (31)      | (30) (29) |  |
| MIG1xZMS1    |           | (34)      | (29) (30) (31) (32) |           |  |
| MIG2xSOK2    | (27)      |           | (32)                |           |  |
| MIG3xMSN2    |           | (34) (35) | (29) (30) (31)      | (30) (29) |  |
| MIG3xPDR1    |           | (34) (35) | (29) (30) (31)      |           |  |
| MIG3xPDR8    |           | (34) (35) | (29) (30) (31)      |           |  |
| MIG3xRDS1    |           | (34)      | (30) (31)           |           |  |
| MIG3xRGM1    |           | (34) (35) | (29) (30) (31)      | (29)      |  |
| MIG3xSOK2    | (27)      | (35)      |                     |           |  |
| MIG3xSTB5    | (27)      |           | (29) (30) (31)      |           |  |
| MIG3xSTP2    | (27)      |           | (29) (30) (31)      |           |  |
| MIG3xYER184C |           | (34) (35) | (30) (31)           |           |  |
| MIG3xYJL103C |           | (34) (35) | (30) (31)           |           |  |
| MIG3xYPL230W |           | (34) (35) | (29) (30) (31)      | (29)      |  |
| MIG3xZMS1    |           | (34)      | (29) (30) (31)      | (30) (29) |  |
| MSN2xNDD1    | (27) (26) |           | (31)                |           |  |
| MSN2xPHO4    |           | (35)      | (31)                | (30)      |  |
| MSN2xRPH1    | (27) (28) |           | (29) (30) (31) (32) |           |  |
| MSN2xSUT1    |           | (34) (35) | (29) (30) (31) (32) | (30) (29) |  |
| MSN2xYJL103C |           | (35)      | (29) (30) (31) (32) |           |  |
| MSN4xNDD1    | (27) (26) |           | (31)                |           |  |
| MSN4xNRG1    | (27)      |           | (29) (30) (31)      |           |  |
| MSN4xPHD1    | (27) (26) |           | (29) (30) (31)      |           |  |
| MSN4xRGM1    | (27) (26) | (35)      |                     | (30) (29) |  |
| MSN4xRPH1    | (27)      |           | (29) (30) (31) (32) | (30)      |  |
| MSN4xSUT1    |           | (34) (35) | (29) (30) (31)      | (30)      |  |
| MSN4xUGA3    | (27)      |           | (29) (30) (31) (32) | (30) (29) |  |
| MSN4xYER184C |           | (34) (35) | (29) (30) (31)      |           |  |

|               |           |           |                |           |  |
|---------------|-----------|-----------|----------------|-----------|--|
| MSN4xYJL103C  |           | (34) (35) | (29) (30) (31) |           |  |
| MSN4xZMS1     |           | (35)      | (29) (30) (31) | (30) (29) |  |
| NDD1xRDR1     |           | (34)      | (30) (31)      |           |  |
| NDD1xSUT1     | (27)      |           | (31)           |           |  |
| NDD1xSWI4     | (27) (26) |           | (29) (31)      |           |  |
| NDD1xXBP1     | (27)      |           | (29)           |           |  |
| NHP10xNRG1    |           | (34)      | (29) (30) (31) |           |  |
| NHP10xPDR1    |           | (34)      | (29) (30) (31) |           |  |
| NHP10xPHD1    |           | (34)      | (30) (31)      |           |  |
| NHP10xRGM1    |           | (34)      | (30) (31)      |           |  |
| NHP10xSUT1    |           | (34)      | (29) (31)      | (30)      |  |
| NHP10xYER184C |           | (34) (35) | (29) (30) (31) | (29)      |  |
| NHP10xYJL103C |           | (34)      | (29) (30) (31) |           |  |
| NHP10xYPL230W |           | (34)      | (30) (31)      |           |  |
| NHP6AxSTB5    |           | (34)      | (29) (31)      | (30) (29) |  |
| NHP6BxSTB5    |           | (34)      | (31)           | (29)      |  |
| NRG1xPHD1     | (27) (26) |           | (29) (30) (31) |           |  |
| NRG1xSKN7     | (27) (26) |           | (32)           |           |  |
| NRG1xSUT1     | (27)      |           | (30) (31) (32) |           |  |
| NRG1xYDR026C  |           | (35)      | (29) (30)      |           |  |
| NRG1xYJL103C  |           | (35)      | (30)           |           |  |
| OAF1xPDR1     | (27)      |           | (31)           |           |  |
| OAF1xRDS1     |           | (35)      | (31)           |           |  |
| OAF1xUME6     |           | (34) (35) | (30) (31)      |           |  |
| OPI1xSUT1     | (27)      |           | (32)           |           |  |
| OPI1xSUT2     |           | (34)      | (32)           |           |  |
| PBF1xSTB3     |           | (34)      | (29) (30) (31) | (30) (29) |  |
| PBF2xSTB3     |           | (34) (35) | (29) (30) (31) | (30) (29) |  |
| PDR1xPDR3     |           | (34)      | (30) (31)      |           |  |
| PDR1xRGM1     | (27) (26) |           | (29) (30) (31) |           |  |
| PDR1xSTB1     | (27) (26) |           | (29)           |           |  |
| PDR1xSTP1     | (27) (26) |           | (30) (31)      |           |  |
| PDR1xSUT1     |           | (34)      | (29) (30) (31) |           |  |
| PDR1xYER184C  |           | (34) (35) | (30) (31)      |           |  |
| PDR1xYJL103C  |           | (35)      | (30) (32)      |           |  |
| PDR3xPDR8     |           | (34) (35) | (31)           |           |  |
| PDR3xRDR1     |           | (34)      | (32)           |           |  |
| PDR3xRDS1     | (27)      | (34)      |                |           |  |
| PDR3xRGT1     |           | (35)      | (31)           | (30)      |  |
| PDR3xSUT1     |           | (35)      | (30) (31)      |           |  |
| PDR3xUME6     |           | (34)      | (30) (32)      |           |  |

|              |                |           |                     |           |  |
|--------------|----------------|-----------|---------------------|-----------|--|
| PDR8xPHO4    |                | (35)      | (31)                |           |  |
| PDR8xRDS1    |                | (34)      | (30)                |           |  |
| PDR8xSTP1    |                | (35)      | (29) (30) (31) (32) |           |  |
| PDR8xTYE7    |                | (34)      | (30) (31)           | (30)      |  |
| PDR8xUME6    |                | (34)      | (32)                |           |  |
| PDR8xYER184C |                | (35)      | (29)                |           |  |
| PDR8xYPR196W |                | (34)      | (31)                | (30)      |  |
| PHD1xRGM1    | (26)           |           | (29) (30) (31)      |           |  |
| PHD1xSKN7    | (27) (26)      |           | (31) (32)           |           |  |
| PHD1xSOK2    | (27) (26)      |           | (31) (32)           |           |  |
| PHD1xTYE7    |                | (34)      | (30) (32)           |           |  |
| PHD1xZMS1    |                | (35)      | (29) (30) (31)      |           |  |
| PHO4xRAP1    |                | (34) (35) | (32)                |           |  |
| PHO4xSFP1    |                | (34) (35) | (32)                | (30)      |  |
| PHO4xSTP1    |                | (35)      | (31) (32)           |           |  |
| PHO4xSUT1    |                | (34) (35) | (29) (31) (32)      |           |  |
| PHO4xTYE7    |                | (34) (35) | (29) (31) (32)      |           |  |
| RAP1xRCS1    |                | (34) (35) | (29) (32)           |           |  |
| RAP1xRPH1    | (27) (26) (28) | (35)      |                     |           |  |
| RAP1xRSC3    |                | (35)      | (31)                |           |  |
| RAP1xYJL103C |                | (34) (35) | (29)                |           |  |
| RCS1xRPH1    | (27)           |           | (31) (32)           | (29)      |  |
| RCS1xSOK2    |                | (34)      | (30) (31) (32)      | (30)      |  |
| RCS1xSTP2    | (26)           |           | (29) (31) (32)      |           |  |
| RDR1xUGA3    |                | (35)      | (29) (31) (32)      |           |  |
| RDS1xREB1    | (27)           |           | (30)                |           |  |
| RDS1xRGT1    |                | (35)      | (30) (31)           |           |  |
| RDS1xRPN4    |                | (35)      | (29) (32)           |           |  |
| RDS1xSTB2    | (27)           |           | (31) (32)           |           |  |
| RDS1xSWI4    |                | (34)      | (29) (32)           | (29)      |  |
| RDS1xYER184C |                | (35)      | (32)                |           |  |
| RDS2xSKN7    |                | (35)      | (30) (31) (32)      |           |  |
| REB1xSKN7    | (28)           | (35)      |                     |           |  |
| REB1xSTB3    |                | (34)      | (29) (30) (31)      | (30) (29) |  |
| REB1xSTP1    | (28)           |           | (32)                |           |  |
| REB1xSWI4    | (28)           |           | (31) (32)           |           |  |
| REB1xSWI6    |                | (34)      | (31) (32)           | (29)      |  |
| REB1xUME6    | (28)           |           | (29) (31) (32)      |           |  |
| RGM1xSUT1    |                | (34) (35) | (29) (30) (31) (32) | (29)      |  |
| RGM1xYER184C |                | (34) (35) | (30) (31) (32)      | (30)      |  |
| RGM1xYJL103C |                | (35)      | (30) (31) (32)      | (30)      |  |

|              |                |           |                     |           |  |
|--------------|----------------|-----------|---------------------|-----------|--|
| RGM1xZMS1    | (27) (26)      |           | (30) (31)           | (30)      |  |
| RGT1xYJL103C |                | (35)      | (31)                | (29)      |  |
| RGT1xYPR196W |                | (35)      | (31)                |           |  |
| RPH1xSUT1    |                | (35)      | (29) (30) (31) (32) |           |  |
| RPH1xYER184C |                | (35)      | (30) (32)           |           |  |
| RPH1xYJL103C |                | (35)      | (30) (32)           |           |  |
| RPH1xYPL230W |                | (35)      | (29) (30) (31) (32) | (30)      |  |
| RPN4xSUT1    |                | (34) (35) | (30) (31) (32)      |           |  |
| RPN4xYDR026C |                | (34) (35) | (29) (30) (31) (32) |           |  |
| RPN4xZMS1    |                | (34) (35) | (30) (32)           |           |  |
| RSC3xSFP1    |                | (35)      | (29)                |           |  |
| RTG3xSKN7    | (27)           |           | (32)                |           |  |
| RTG3xSUM1    | (27) (26)      |           | (30) (32)           | (29)      |  |
| RTG3xSUT1    |                | (34) (35) | (29)                |           |  |
| RTG3xSWI6    |                | (34)      | (29) (32)           |           |  |
| RTG3xTYE7    | (27)           |           | (31) (32)           |           |  |
| SIG1xXBP1    |                | (34)      | (29)                |           |  |
| SIP4xSTP1    | (27) (26)      |           | (32)                |           |  |
| SKN7xSOK2    | (27) (26)      |           | (32)                | (30)      |  |
| SKN7xSTB1    | (26)           |           | (32)                |           |  |
| SKN7xSTP1    | (28)           |           | (29) (32)           |           |  |
| SKN7xSUT1    | (27)           |           | (29) (32)           | (30)      |  |
| SKN7xSWI4    | (27) (26) (28) |           | (31) (32)           | (29)      |  |
| SKN7xSWI5    | (27) (26) (28) |           | (29) (32)           |           |  |
| SKN7xSWI6    | (27) (26)      |           | (32)                |           |  |
| SKN7xUME6    | (27) (28)      |           | (30) (32)           |           |  |
| SKN7xYJL103C |                | (34) (35) | (29)                |           |  |
| SNT2xSTB5    |                | (34)      | (30) (31)           |           |  |
| SOK2xSUT1    | (27)           |           | (32)                |           |  |
| STB1xSTB2    |                | (34)      | (31) (32)           |           |  |
| STB1xXBP1    |                | (35)      | (29) (30) (32)      |           |  |
| STB2xSTB3    |                | (34)      | (29) (30) (31)      | (30) (29) |  |
| STB2xSWI4    |                | (34)      | (30) (31) (32)      | (30)      |  |
| STB2xSWI6    |                | (34) (35) | (29) (30) (31) (32) | (30) (29) |  |
| STB2xYER184C | (27)           |           | (32)                |           |  |
| STB2xYRR1    | (27)           |           | (32)                |           |  |
| STB3xSWI6    |                | (34)      | (30)                |           |  |
| STB3xYBL054W |                | (34)      | (29) (30) (31)      | (30) (29) |  |
| STB4xUGA3    |                | (35)      | (30) (31)           |           |  |
| STB4xYER184C | (27)           |           | (29) (32)           |           |  |
| STP1xSUM1    | (27) (26)      |           | (32)                | (30)      |  |

|                 |           |           |                     |           |  |
|-----------------|-----------|-----------|---------------------|-----------|--|
| STP1xSUT1       |           | (35)      | (29) (30) (31) (32) | (30) (29) |  |
| STP1xSWI4       | (28)      |           | (32)                |           |  |
| STP1xUGA3       | (27) (28) |           | (29) (30) (31) (32) |           |  |
| STP1xUME6       | (28)      |           | (30) (31) (32)      |           |  |
| STP1xYER184C    |           | (35)      | (29) (30) (31)      |           |  |
| STP1xYJL103C    |           | (35)      | (29) (30) (31)      |           |  |
| STP2xZMS1       |           | (34)      | (29) (30) (31) (32) |           |  |
| SUM1xSWI6       |           | (35)      | (32)                | (29)      |  |
| SUT1xSWI4       | (27)      |           | (29) (32)           | (29)      |  |
| SUT1xSWI6       | (27)      |           | (29) (32)           |           |  |
| SUT1xYER130C    |           | (35)      | (29) (30) (31)      | (30) (29) |  |
| SUT1xYER184C    |           | (34) (35) | (30) (31) (32)      |           |  |
| SUT1xYJL103C    |           | (34) (35) | (30) (31)           |           |  |
| SUT1xYPL230W    |           | (34) (35) | (29) (30) (31)      | (29)      |  |
| SUT1xYPR196W    |           | (35)      | (30) (31) (32)      |           |  |
| SUT1xZMS1       |           | (34) (35) | (29) (30) (31) (32) | (30)      |  |
| SWI4xUGA3       | (28)      |           | (29) (31) (32)      |           |  |
| SWI4xXBP1       | (28)      |           | (29) (30) (31)      |           |  |
| SWI6xYDR026C    |           | (34)      | (31)                |           |  |
| UGA3xYER184C    |           | (35)      | (31)                |           |  |
| UGA3xYJL103C    |           | (35)      | (31)                |           |  |
| UME6xYER184C    |           | (34)      | (30) (31)           |           |  |
| UME6xYPR196W    |           | (34) (35) | (30) (31)           | (30)      |  |
| USV1xZMS1       |           | (35)      | (29) (30) (31)      |           |  |
| YAP3xYAP7       |           | (34)      | (32)                |           |  |
| YER184CxYPL230W |           | (34) (35) | (30) (31)           | (30)      |  |
| YJL103CxYPL230W |           | (35)      | (30) (31)           | (30)      |  |
| YJL103CxYPR196W |           | (35)      | (30) (31)           |           |  |
| YJL103CxZMS1    |           | (34) (35) | (30) (31)           |           |  |
| YPR196WxYRM1    |           | (34)      | (30)                | (29)      |  |
| ABF1xDIG1       |           | (34)      |                     |           |  |
| ABF1xHAC1       |           |           | (31)                |           |  |
| ABF1xHMS1       |           | (34)      |                     |           |  |
| ABF1xIME1       |           | (35)      |                     |           |  |
| ABF1xMATALPHA2  |           | (34)      |                     |           |  |
| ABF1xMBP1       |           |           | (30) (31)           |           |  |
| ABF1xMIG1       |           |           | (32)                |           |  |
| ABF1xPDR1       |           | (34)      |                     |           |  |

|              |      |      |                     |      |  |
|--------------|------|------|---------------------|------|--|
| ABF1xPDR3    |      | (34) |                     |      |  |
| ABF1xRDS1    |      | (34) |                     |      |  |
| ABF1xREB1    |      |      | (32)                |      |  |
| ABF1xRGM1    |      |      | (32)                | (30) |  |
| ABF1xRTG3    |      |      | (32)                |      |  |
| ABF1xSKN7    |      |      | (32)                |      |  |
| ABF1xSTB1    |      |      | (30) (31)           |      |  |
| ABF1xSTP1    |      |      | (32)                |      |  |
| ABF1xSUM1    |      |      | (29) (30) (31) (32) |      |  |
| ABF1xSUT1    |      |      | (31)                |      |  |
| ABF1xSWI6    |      |      | (30) (32)           |      |  |
| ABF1xTYE7    | (27) |      |                     |      |  |
| ABF1xYDR026C |      |      | (29)                |      |  |
| ABF1xYER184C |      |      | (32)                |      |  |
| ABF1xZAP1    | (26) |      |                     |      |  |
| ABF2xXBP1    |      |      | (29)                |      |  |
| ACA1xAFT2    |      |      | (29)                |      |  |
| ACA1xCAT8    |      |      | (30) (31) (32)      |      |  |
| ACA1xGAL80   |      | (35) |                     |      |  |
| ACA1xGIS1    |      |      | (30)                |      |  |
| ACA1xMET31   |      |      | (29) (30)           |      |  |
| ACA1xMIG1    |      |      | (29)                |      |  |
| ACA1xMIG3    |      |      | (29) (30)           |      |  |
| ACA1xMSN2    |      |      | (30) (31)           |      |  |
| ACA1xMSN4    |      |      | (29) (30) (31)      |      |  |
| ACA1xNHP10   |      |      | (30) (31)           |      |  |
| ACA1xRDS1    |      |      | (29) (30) (31)      |      |  |
| ACA1xRGM1    |      |      | (30)                |      |  |
| ACA1xRPH1    |      | (35) |                     |      |  |
| ACA1xSTP3    |      |      | (31)                | (29) |  |
| ACA1xSUT1    |      |      | (29) (30) (31) (32) |      |  |
| ACA1xSWI6    |      |      | (30) (32)           |      |  |
| ACA1xUME6    |      |      | (32)                |      |  |
| ACA1xYPL230W |      |      | (30)                |      |  |
| ACA1xZMS1    |      |      | (29)                |      |  |
| ACE2xCBF1    |      |      | (32)                |      |  |
| ACE2xMET28   |      |      | (29)                |      |  |
| ACE2xRSC3    |      |      | (29)                |      |  |
| ACE2xRSC30   |      |      | (29)                |      |  |
| ACE2xTYE7    |      |      | (29) (32)           |      |  |
| AFT1xAFT2    |      | (34) |                     |      |  |

|               |           |           |                |      |  |
|---------------|-----------|-----------|----------------|------|--|
| AFT1xRCS1     |           | (34)      |                | (29) |  |
| AFT2xCAT8     |           |           | (31)           |      |  |
| AFT2xINO2     |           |           | (31) (32)      |      |  |
| AFT2xMIG3     |           |           | (29) (31)      |      |  |
| AFT2xPHD1     |           |           | (29) (31)      |      |  |
| AFT2xPHO4     |           |           | (29) (31) (32) | (30) |  |
| AFT2xRSC3     |           |           | (29)           |      |  |
| AFT2xSTB2     |           |           | (29) (32)      |      |  |
| AFT2xSTP1     |           |           | (31) (32)      |      |  |
| AFT2xSUT1     |           |           | (29) (31) (32) |      |  |
| AFT2xZMS1     |           |           | (31) (32)      |      |  |
| ARG80xSTB3    |           | (34)      |                |      |  |
| ARG80xSUT2    |           |           | (32)           |      |  |
| ARG80xZMS1    |           |           | (29) (31)      |      |  |
| ARG81xCAT8    |           |           | (31)           |      |  |
| ARG81xMIG1    |           |           | (31)           | (29) |  |
| ARG81xRDS1    |           |           | (30)           |      |  |
| ARG81xRPH1    | (27) (26) |           |                |      |  |
| ARG81xSTP2    | (27) (26) |           |                |      |  |
| ARG81xSTP3    |           |           | (31)           |      |  |
| ARG81xSUT1    |           |           | (29) (31)      |      |  |
| ARG81xYJL103C |           |           | (32)           |      |  |
| ARO80xIME1    |           |           | (29)           |      |  |
| ARO80xPHD1    |           |           | (32)           |      |  |
| ARO80xUME6    |           |           | (29)           |      |  |
| ARO80xYRM1    |           | (35)      |                |      |  |
| ASG1xGIS1     |           | (34) (35) |                |      |  |
| ASG1xPHD1     |           | (35)      |                |      |  |
| ASG1xRGM1     |           | (34) (35) |                |      |  |
| ASG1xSTB5     |           | (35)      |                |      |  |
| ASG1xSTP1     |           | (34) (35) |                |      |  |
| ASG1xSTP3     |           | (35)      |                |      |  |
| ASG1xYPL230W  |           | (35)      |                |      |  |
| ASH1xCBF1     |           |           | (32)           |      |  |
| ASH1xMCM1     |           |           | (32)           |      |  |
| ASH1xOPI1     |           |           | (32)           |      |  |
| ASH1xTYE7     |           |           | (32)           |      |  |
| ASH1xYPR196W  | (27)      |           |                |      |  |
| CAD1xCBF1     | (27)      |           |                |      |  |
| CAT8xDAL82    |           |           | (30)           |      |  |
| CAT8xHAC1     |           |           | (31)           |      |  |

|              |           |           |                     |      |      |
|--------------|-----------|-----------|---------------------|------|------|
| CAT8xNHP10   |           |           | (30) (31)           |      |      |
| CAT8xNRG1    |           |           | (30) (31)           |      |      |
| CAT8xPDR3    |           |           | (30) (31) (32)      |      |      |
| CAT8xRCS1    |           |           | (31)                |      |      |
| CAT8xRDS2    |           |           | (30) (32)           |      |      |
| CAT8xSKN7    |           |           | (30) (31) (32)      |      |      |
| CAT8xSTB4    |           |           | (31)                |      |      |
| CAT8xSTB5    |           |           | (30) (31) (32)      |      |      |
| CAT8xSTP2    |           |           | (30) (31)           |      |      |
| CAT8xUGA3    |           |           | (30) (31)           |      |      |
| CAT8xYDR026C |           |           | (31)                | (29) |      |
| CAT8xYJL103C |           | (35)      |                     |      |      |
| CAT8xYLL054C |           |           | (31)                |      |      |
| CAT8xYPR196W |           |           | (30) (31)           |      |      |
| CAT8xYRM1    |           |           | (30)                |      |      |
| CAT8xZMS1    |           |           | (30) (31)           |      |      |
| CBF1xCRZ1    |           |           | (30) (31) (32)      |      |      |
| CBF1xFHL1    |           |           | (29)                |      |      |
| CBF1xHAP1    |           | (34) (35) |                     |      |      |
| CBF1xHMS1    |           |           | (29) (31)           | (29) |      |
| CBF1xMBP1    |           |           | (29) (32)           |      |      |
| CBF1xMET31   | (27) (26) |           |                     |      | (58) |
| CBF1xPDR3    |           |           | (32)                |      |      |
| CBF1xRDS2    |           |           | (31)                |      |      |
| CBF1xREB1    |           |           | (32)                |      |      |
| CBF1xRPH1    |           |           | (29) (30) (31) (32) |      |      |
| CBF1xSFP1    |           |           | (29) (32)           |      |      |
| CBF1xSTB2    |           |           | (32)                |      |      |
| CBF1xSTB4    |           |           | (31)                |      |      |
| CBF1xSTP1    |           |           | (29) (31) (32)      |      |      |
| CBF1xYDR026C |           |           | (32)                |      |      |
| CBF1xYDR520C |           |           | (32)                |      |      |
| CBF1xYJL103C |           | (34) (35) |                     |      |      |
| CBF1xYOX1    |           |           | (32)                |      |      |
| CBF1xYRM1    |           |           | (30) (31)           |      |      |
| CEP3xMIG3    |           | (35)      |                     |      |      |
| CEP3xRDS1    |           | (34)      |                     |      |      |
| CEP3xSTB4    |           |           | (29)                |      |      |
| CEP3xYNR063W |           | (34) (35) |                     |      |      |
| CHA4xGIS1    |           | (34) (35) |                     |      |      |
| CHA4xYPL230W |           | (34) (35) |                     |      |      |



|               |      |      |                     |           |  |
|---------------|------|------|---------------------|-----------|--|
| CIN5xMET4     |      |      | (29)                |           |  |
| CIN5xNHP6A    | (28) |      |                     |           |  |
| CIN5xPDR8     |      |      | (30) (31)           |           |  |
| CIN5xSTB2     |      |      | (30)                |           |  |
| CIN5xYPR196W  |      |      | (31)                | (30)      |  |
| CRZ1xGIS1     |      |      | (29) (30) (31)      |           |  |
| CRZ1xINO2     |      |      | (30) (31) (32)      |           |  |
| CRZ1xMSN2     |      |      | (29) (30) (31) (32) | (30)      |  |
| CRZ1xPDR3     |      |      | (30) (32)           |           |  |
| CRZ1xRDS1     |      |      | (30)                |           |  |
| CRZ1xRGM1     |      |      | (29) (30) (31) (32) |           |  |
| CRZ1xSTP1     |      |      | (30) (31) (32)      |           |  |
| CRZ1xSUT1     |      |      | (29) (30) (31) (32) |           |  |
| CRZ1xTYE7     |      |      | (31)                |           |  |
| CRZ1xYPL230W  |      |      | (29) (30) (31)      |           |  |
| CST6xYLL054C  |      | (35) |                     |           |  |
| CUP9xRSC3     |      | (35) |                     |           |  |
| CUP9xRSC30    |      | (35) |                     |           |  |
| DAL80xGAT1    |      |      | (30) (32)           |           |  |
| DAL80xBP1     |      |      | (31) (32)           | (30) (29) |  |
| DAL82xHAP3    | (26) |      |                     |           |  |
| DAL82xIME1    |      |      | (29)                |           |  |
| DAL82xLYS14   |      |      | (31)                |           |  |
| DAL82xMBP1    |      |      | (29)                |           |  |
| DAL82xMCM1    |      |      | (29) (31)           |           |  |
| DAL82xPDR1    |      |      | (29) (30) (31)      |           |  |
| DAL82xPHD1    |      |      | (31)                | (29)      |  |
| DAL82xREB1    |      |      | (29)                |           |  |
| DAL82xRSC3    |      |      | (30)                |           |  |
| DAL82xSTB1    |      |      | (29) (32)           |           |  |
| DAL82xSUT1    |      |      | (30) (31)           |           |  |
| DAL82xSWI4    |      |      | (29)                |           |  |
| DAL82xTYE7    |      |      | (32)                |           |  |
| DAL82xYER184C |      |      | (31)                |           |  |
| ECM23xGAT4    |      | (34) |                     |           |  |
| ECM23xGCR1    |      | (34) |                     |           |  |
| ECM23xMET4    |      | (35) |                     |           |  |
| EDS1xGAL80    | (27) |      |                     |           |  |
| EDS1xMBP1     |      | (34) |                     | (29)      |  |
| EDS1xRGT1     |      |      | (29)                | (29)      |  |
| FHL1xINO4     | (28) |      |                     |           |  |

|               |           |           |                |           |      |
|---------------|-----------|-----------|----------------|-----------|------|
| FHL1xTYE7     |           |           | (29)           |           |      |
| FHL1xYJL103C  |           | (34) (35) |                |           |      |
| FKH1xHCM1     |           | (34)      |                | (30)      |      |
| FKH1xNDD1     | (27) (26) |           |                |           | (56) |
| FKH2xNDD1     | (27) (26) |           |                | (29)      | (56) |
| GAL4xMSN4     | (27) (26) |           |                |           |      |
| GAL4xRGM1     | (27) (26) |           |                |           |      |
| GAL80xGIS1    |           | (34)      |                |           |      |
| GAL80xIME1    |           | (35)      |                |           |      |
| GAL80xSKN7    |           | (34)      |                |           |      |
| GAL80xYER184C |           | (34)      |                |           |      |
| GAL80xYJL103C |           | (34)      |                |           |      |
| GAL80xYPL230W |           | (34)      |                |           |      |
| GAT3xMCM1     |           |           | (32)           |           |      |
| GAT3xRLM1     |           |           | (29)           |           |      |
| GAT4xMOT3     |           | (34)      |                |           |      |
| GCN4xRSC3     |           |           | (31)           |           |      |
| GCN4xTBF1     |           |           | (29)           |           |      |
| GCR1xLYS14    |           | (34)      |                |           |      |
| GCR1xSTB4     |           | (34)      |                |           |      |
| GCR2xSNF1     |           |           | (32)           |           |      |
| GCR2xSTB4     |           |           | (29)           |           |      |
| GCR2xYBL054W  |           | (34)      |                | (30) (29) |      |
| GIS1xMIG2     |           |           | (30) (31)      |           |      |
| GIS1xMSN4     |           | (35)      |                | (30) (29) |      |
| GIS1xNRG1     |           |           | (29) (30) (31) |           |      |
| GIS1xOAF1     |           |           | (30) (31)      | (30)      |      |
| GIS1xOPI1     |           |           | (29)           |           |      |
| GIS1xPDR1     |           |           | (29) (30) (31) |           |      |
| GIS1xPHD1     |           |           | (29) (30) (31) |           |      |
| GIS1xRDS1     |           |           | (30) (31)      |           |      |
| GIS1xRDS2     |           |           | (29) (30) (31) | (30)      |      |
| GIS1xRSC3     |           |           | (29) (30) (31) | (30)      |      |
| GIS1xSKN7     |           |           | (30) (31)      |           |      |
| GIS1xSOK2     |           |           | (31)           |           |      |
| GIS1xSTP1     |           |           | (29) (30) (31) | (30)      |      |
| GIS1xTBF1     |           |           | (30)           | (30)      |      |
| GIS1xUGA3     |           |           | (29) (30) (31) |           |      |
| GIS1xUME6     |           |           | (30) (31)      |           |      |
| GIS1xYDR026C  |           |           | (30) (31)      | (30)      |      |
| GIS1xZMS1     |           |           | (30) (31)      | (30)      |      |

|              |           |           |                |      |  |
|--------------|-----------|-----------|----------------|------|--|
| GSM1xMIG1    |           |           | (30) (31)      |      |  |
| GSM1xRDS1    |           | (35)      |                |      |  |
| GSM1xREB1    |           |           | (29)           |      |  |
| GTS1xMET32   |           |           | (32)           | (29) |  |
| HAC1xMIG1    |           |           | (29) (31)      |      |  |
| HAC1xPHD1    |           |           | (31)           |      |  |
| HAC1xSWI6    |           |           | (29)           |      |  |
| HAC1xTYE7    | (27)      |           |                |      |  |
| HAP1xMIG3    |           | (34) (35) |                |      |  |
| HAP1xREB1    |           |           | (29)           |      |  |
| HAP1xRSC3    |           |           | (31)           | (30) |  |
| HAP1xSFP1    |           |           | (29)           |      |  |
| HAP1xZMS1    |           |           | (29) (31)      |      |  |
| HAP2xRDS1    |           |           | (30)           |      |  |
| HAP2xYLL054C |           | (35)      |                |      |  |
| HAP3xRSC3    |           |           | (29) (30) (31) |      |  |
| HAP3xSWI6    |           | (35)      |                |      |  |
| HAP3xYAP3    |           |           | (32)           |      |  |
| HAP3xYBL054W |           | (35)      |                |      |  |
| HAP4xYLL054C |           |           | (30)           |      |  |
| HAP5xPHD1    |           |           | (32)           |      |  |
| HAP5xRSC3    |           |           | (29) (30) (31) |      |  |
| HAP5xSTP2    | (27) (26) |           |                |      |  |
| HAP5xYAP3    |           |           | (32)           |      |  |
| HAP5xYDR026C |           | (34) (35) |                |      |  |
| HCM1xMCM1    |           | (35)      |                | (30) |  |
| HMRA2xNHP6B  |           |           | (30) (31)      |      |  |
| HMS1xMIG1    |           |           | (29) (30) (31) | (30) |  |
| HMS1xRSC3    |           |           | (30)           |      |  |
| HMS1xYOX1    | (27)      |           |                |      |  |
| HMS1xZMS1    |           |           | (30) (31)      |      |  |
| HSF1xYRR1    | (27)      |           |                |      |  |
| IME1xMCM1    |           |           | (29) (30) (32) |      |  |
| IME1xNDD1    |           |           | (29) (31)      |      |  |
| IME1xPDR1    |           |           | (30)           |      |  |
| IME1xRPN4    |           |           | (30) (31) (32) |      |  |
| IME1xRSC3    |           |           | (29) (30) (31) |      |  |
| IME1xRSC30   |           |           | (29) (30) (31) |      |  |
| IME1xSTP1    |           |           | (30) (31)      |      |  |
| IME1xUGA3    |           |           | (29) (30) (31) |      |  |
| INO2xOAF1    |           |           | (32)           |      |  |

|               |                |           |                |      |  |
|---------------|----------------|-----------|----------------|------|--|
| INO2xRCS1     |                |           | (31) (32)      |      |  |
| INO2xRDS1     |                | (34)      |                |      |  |
| INO2xREB1     | (28)           |           |                |      |  |
| INO2xSTB2     |                |           | (32)           |      |  |
| INO2xSTB4     |                |           | (32)           |      |  |
| INO2xYDR026C  |                |           | (32)           |      |  |
| INO4xPHO4     |                | (35)      |                |      |  |
| INO4xRAP1     | (27) (26) (28) |           |                |      |  |
| INO4xREB1     | (28)           |           |                |      |  |
| INO4xXBP1     | (28)           |           |                |      |  |
| INO4xYLL054C  |                | (34)      |                |      |  |
| LEU3xMIG3     | (27)           |           |                |      |  |
| LEU3xSTB1     |                |           | (29)           |      |  |
| LEU3xSUT2     |                | (34) (35) |                |      |  |
| LEU3xYJL103C  |                | (35)      |                |      |  |
| LYS14xNHP10   |                |           | (30) (31)      | (29) |  |
| LYS14xNRG1    |                | (35)      |                |      |  |
| LYS14xPDR8    |                | (35)      |                |      |  |
| LYS14xSTB4    |                | (34)      |                |      |  |
| LYS14xSUT1    |                |           | (30) (31)      |      |  |
| LYS14xSUT2    |                | (35)      |                |      |  |
| LYS14xYLL054C |                |           | (31)           |      |  |
| LYS14xYRM1    |                |           | (31)           |      |  |
| MATA1xRLM1    | (26)           |           |                |      |  |
| MBP1xNDT80    |                |           | (30)           |      |  |
| MBP1xRDS1     |                |           | (32)           |      |  |
| MBP1xSTB3     |                |           | (30)           |      |  |
| MBP1xSTP1     |                |           | (31)           |      |  |
| MBP1xSTP2     |                |           | (31)           |      |  |
| MBP1xSUT1     |                |           | (29) (31) (32) |      |  |
| MBP1xTYE7     |                |           | (29)           |      |  |
| MCM1xMSN2     |                |           | (29) (30) (31) |      |  |
| MCM1xPHD1     |                |           | (31) (32)      |      |  |
| MCM1xRDS2     |                |           | (30) (32)      |      |  |
| MCM1xSTB1     |                |           | (29) (32)      |      |  |
| MCM1xSTP2     |                |           | (32)           |      |  |
| MCM1xUGA3     |                |           | (29) (31) (32) |      |  |
| MCM1xUME6     |                |           | (30) (32)      |      |  |
| MCM1xXBP1     |                |           | (29)           |      |  |
| MCM1xYPR196W  |                |           | (32)           |      |  |
| MET28xPHO4    |                |           | (31) (32)      |      |  |

|                   |      |      |                     |           |  |
|-------------------|------|------|---------------------|-----------|--|
| MET28xSTB5        |      | (34) |                     | (30) (29) |  |
| MET28xSUT1        |      |      | (29) (30) (32)      |           |  |
| MET28xYNR063<br>W |      | (35) |                     |           |  |
| MET31xMIG1        |      |      | (29) (30) (31)      |           |  |
| MET31xMSN4        |      |      | (29) (30) (31)      |           |  |
| MET31xPHO4        |      |      | (31) (32)           |           |  |
| MET31xRSC3        |      |      | (30)                |           |  |
| MET31xSKN7        |      |      | (31) (32)           |           |  |
| MET31xSTP3        |      |      | (31)                |           |  |
| MET31xTYE7        |      |      | (32)                | (30)      |  |
| MET4xSKN7         |      |      | (31)                |           |  |
| MET4xSTB2         |      |      | (31)                |           |  |
| MIG1xOAF1         |      |      | (30) (31) (32)      |           |  |
| MIG1xOPI1         |      |      | (32)                |           |  |
| MIG1xPDR3         |      |      | (31)                |           |  |
| MIG1xPDR8         |      |      | (30) (31) (32)      |           |  |
| MIG1xRPH1         |      |      | (29) (30) (31) (32) |           |  |
| MIG1xSIP4         |      | (35) |                     |           |  |
| MIG1xSTB2         |      |      | (32)                |           |  |
| MIG1xSTB5         |      |      | (30) (31)           |           |  |
| MIG1xSUT2         |      |      | (30) (31) (32)      |           |  |
| MIG1xUME6         |      |      | (30) (31) (32)      |           |  |
| MIG1xYDR026C      |      |      | (32)                |           |  |
| MIG1xYRM1         |      |      | (30) (31)           | (29)      |  |
| MIG2xRGM1         |      |      | (30) (31)           |           |  |
| MIG2xSTP2         |      |      | (32)                |           |  |
| MIG2xSUT1         |      |      | (30) (31) (32)      |           |  |
| MIG2xYPL230W      |      |      | (30) (31)           |           |  |
| MIG3xOAF1         |      |      | (30) (31)           | (29)      |  |
| MIG3xOPI1         | (27) |      |                     |           |  |
| MIG3xRPH1         |      |      | (29) (30) (31)      |           |  |
| MIG3xRPN4         |      | (35) |                     |           |  |
| MIG3xRSC3         |      |      | (31)                |           |  |
| MIG3xSKN7         |      |      | (29)                |           |  |
| MIG3xSTB2         |      |      | (29)                |           |  |
| MIG3xSTP3         |      |      | (30) (31)           |           |  |
| MIG3xSUT2         |      |      | (30) (31)           |           |  |
| MIG3xUGA3         |      |      | (29) (30) (31)      |           |  |
| MIG3xUME6         |      |      | (30) (31)           |           |  |
| MIG3xYDR520C      |      |      | (30)                |           |  |

|              |           |           |                     |           |  |
|--------------|-----------|-----------|---------------------|-----------|--|
| MIG3xYER130C |           |           | (30) (31)           |           |  |
| MIG3xYRM1    |           |           | (30) (31)           |           |  |
| MOT3xUSV1    |           | (35)      |                     |           |  |
| MSN2xMSN4    | (27) (26) |           |                     | (30) (29) |  |
| MSN2xREB1    | (28)      |           |                     |           |  |
| MSN2xRSC3    |           |           | (29) (30) (31)      | (30) (29) |  |
| MSN2xSOK2    |           |           | (31) (32)           | (30)      |  |
| MSN2xYDR026C |           |           | (29) (30) (31)      |           |  |
| MSN2xYER184C |           |           | (30) (31)           |           |  |
| MSN4xRDS1    |           |           | (30) (31)           |           |  |
| MSN4xRSC3    |           |           | (29) (30) (31)      | (30) (29) |  |
| MSN4xSTP1    |           |           | (29) (30) (31)      | (30)      |  |
| MSN4xYDR026C |           |           | (29) (30) (31) (32) |           |  |
| MSN4xYLL054C |           |           | (30)                |           |  |
| MSN4xYPL230W |           | (35)      |                     | (30) (29) |  |
| NDD1xRDS2    |           |           | (31)                |           |  |
| NDD1xYLL054C |           | (35)      |                     |           |  |
| NHP10xOAF1   |           |           | (30) (31)           |           |  |
| NHP10xRDS1   |           |           | (30)                |           |  |
| NHP10xRDS2   |           | (34)      |                     |           |  |
| NHP10xSKN7   |           |           | (29)                |           |  |
| NHP10xSTB5   |           |           | (29) (30) (31)      |           |  |
| NHP10xSTP1   |           |           | (30) (31)           |           |  |
| NHP10xSTP2   |           |           | (29) (30) (31)      |           |  |
| NHP10xYRM1   |           | (34)      |                     |           |  |
| NHP10xZMS1   |           |           | (30)                |           |  |
| NHP6AxNHP6B  |           | (34)      |                     |           |  |
| NHP6AxSPT15  |           | (34) (35) |                     |           |  |
| NHP6BxPHO2   |           | (34) (35) |                     |           |  |
| NHP6BxRLM1   |           |           | (29) (30) (31)      |           |  |
| NRG1xOPI1    |           |           | (32)                |           |  |
| NRG1xRDR1    |           |           | (32)                |           |  |
| NRG1xREB1    |           |           | (32)                |           |  |
| NRG1xRGM1    |           |           | (29) (30) (31)      |           |  |
| NRG1xRSC3    |           |           | (30) (31)           |           |  |
| NRG1xSTB2    |           |           | (29) (32)           |           |  |
| NRG1xTBF1    |           |           | (30)                |           |  |
| NRG1xYBL054W |           |           | (32)                |           |  |
| NRG1xYER184C |           |           | (29) (30) (31)      |           |  |
| NRG1xYPL230W |           |           | (29) (30) (31)      |           |  |
| NRG1xZMS1    |           |           | (29) (30) (31) (32) |           |  |

|              |  |      |                     |           |  |
|--------------|--|------|---------------------|-----------|--|
| OAF1xOPI1    |  |      | (32)                |           |  |
| OAF1xPDR8    |  |      | (30) (31) (32)      | (30) (29) |  |
| OAF1xRGT1    |  |      | (31)                |           |  |
| OAF1xSTB5    |  |      | (30)                |           |  |
| OAF1xSTP1    |  |      | (29) (30) (31) (32) |           |  |
| OAF1xSUT1    |  |      | (29) (30) (31) (32) | (30) (29) |  |
| OAF1xYPL230W |  |      | (30) (31)           | (30)      |  |
| OAF1xYPR196W |  |      | (31) (32)           |           |  |
| OAF1xZMS1    |  |      | (29) (30) (31) (32) | (30)      |  |
| OPI1xREB1    |  |      | (29)                |           |  |
| OPI1xRGM1    |  |      | (29)                |           |  |
| OPI1xRSC3    |  | (35) |                     |           |  |
| OPI1xRSC30   |  | (35) |                     |           |  |
| OPI1xSFP1    |  |      | (32)                |           |  |
| OPI1xSTB2    |  |      | (32)                |           |  |
| OPI1xYBL054W |  |      | (32)                |           |  |
| OPI1xYPL230W |  |      | (29)                |           |  |
| OPI1xYPR196W |  |      | (32)                |           |  |
| OPI1xZMS1    |  |      | (31) (32)           |           |  |
| PBF1xPBF2    |  | (34) |                     |           |  |
| PDR1xRDR1    |  |      | (30) (31)           |           |  |
| PDR1xRDS1    |  |      | (30)                |           |  |
| PDR1xREB1    |  |      | (31)                |           |  |
| PDR1xRGT1    |  |      | (31)                |           |  |
| PDR1xRSC3    |  |      | (29) (30) (31)      | (30) (29) |  |
| PDR1xRSC30   |  |      | (29) (30) (31)      |           |  |
| PDR1xSWI4    |  |      | (29)                |           |  |
| PDR1xUGA3    |  |      | (29) (31)           |           |  |
| PDR1xUME6    |  | (34) |                     |           |  |
| PDR1xYDR026C |  |      | (32)                |           |  |
| PDR1xYPL230W |  |      | (29) (30) (31)      |           |  |
| PDR1xYRM1    |  |      | (30) (31)           |           |  |
| PDR3xPHO4    |  |      | (32)                |           |  |
| PDR3xRSC3    |  |      | (31)                |           |  |
| PDR3xRTG3    |  |      | (32)                |           |  |
| PDR3xSKO1    |  |      | (32)                |           |  |
| PDR3xSUT2    |  |      | (30) (31)           |           |  |
| PDR3xYER184C |  |      | (31) (32)           |           |  |
| PDR3xYJL103C |  |      | (31)                |           |  |
| PDR3xYRM1    |  | (34) |                     |           |  |
| PDR8xRDR1    |  |      | (29)                |           |  |

|              |  |           |                     |      |  |
|--------------|--|-----------|---------------------|------|--|
| PDR8xREB1    |  |           | (29)                |      |  |
| PDR8xRGT1    |  |           | (30) (31) (32)      |      |  |
| PDR8xSTB5    |  |           | (30) (31) (32)      |      |  |
| PDR8xSUT1    |  |           | (30) (31)           | (30) |  |
| PDR8xSUT2    |  |           | (32)                |      |  |
| PDR8xYJL103C |  | (35)      |                     |      |  |
| PDR8xYRM1    |  |           | (30) (31)           |      |  |
| PHD1xPHO4    |  |           | (30) (31) (32)      |      |  |
| PHD1xRDS1    |  |           | (29) (30) (31)      |      |  |
| PHD1xREB1    |  |           | (31) (32)           |      |  |
| PHD1xRPH1    |  |           | (31)                |      |  |
| PHD1xRSC3    |  |           | (29)                |      |  |
| PHD1xSTB2    |  |           | (31)                |      |  |
| PHD1xSTP1    |  |           | (31) (32)           |      |  |
| PHD1xSTP2    |  |           | (29) (30) (31)      |      |  |
| PHD1xUGA3    |  |           | (31)                |      |  |
| PHD1xXBP1    |  |           | (31)                |      |  |
| PHD1xYER184C |  |           | (31)                |      |  |
| PHD1xYJL103C |  |           | (31)                | (30) |  |
| PHD1xYPL230W |  |           | (29) (30) (31)      |      |  |
| PHO2xSPT15   |  | (34) (35) |                     |      |  |
| PHO4xRSC3    |  |           | (30)                |      |  |
| PHO4xSKN7    |  |           | (31) (32)           |      |  |
| PHO4xSTB4    |  |           | (31)                | (30) |  |
| PHO4xSTP2    |  |           | (30) (31) (32)      |      |  |
| PHO4xYDR026C |  | (34)      |                     |      |  |
| RAP1xSTP2    |  | (35)      |                     |      |  |
| RAP1xTYE7    |  |           | (29) (32)           |      |  |
| RCS1xRSC3    |  |           | (29)                |      |  |
| RCS1xSUT1    |  |           | (29) (30) (31) (32) |      |  |
| RCS1xZMS1    |  |           | (30) (31) (32)      | (30) |  |
| RDR1xSTB1    |  |           | (32)                |      |  |
| RDR1xSTP1    |  |           | (32)                |      |  |
| RDR1xSUT1    |  |           | (30) (31) (32)      |      |  |
| RDS1xRDS2    |  |           | (30) (31)           | (29) |  |
| RDS1xRGM1    |  |           | (30) (31) (32)      |      |  |
| RDS1xRPH1    |  |           | (30)                |      |  |
| RDS1xRSC3    |  | (35)      |                     |      |  |
| RDS1xRSC30   |  | (35)      |                     |      |  |
| RDS1xSKN7    |  |           | (29)                |      |  |
| RDS1xSTB1    |  |           | (29)                |      |  |



|              |  |      |                     |      |  |
|--------------|--|------|---------------------|------|--|
| RDS1xSTB5    |  |      | (29) (30) (31)      |      |  |
| RDS1xSTP2    |  |      | (32)                |      |  |
| RDS1xSUT1    |  |      | (29) (30) (31) (32) |      |  |
| RDS1xUGA3    |  |      | (31)                |      |  |
| RDS1xUME6    |  | (34) |                     |      |  |
| RDS1xYDR026C |  |      | (30) (31)           |      |  |
| RDS1xYDR520C |  |      | (32)                |      |  |
| RDS1xYJL103C |  | (35) |                     |      |  |
| RDS1xYPL230W |  |      | (30) (31)           |      |  |
| RDS1xYRM1    |  |      | (29) (30)           |      |  |
| RDS1xZMS1    |  |      | (30) (31)           |      |  |
| RDS2xRGM1    |  |      | (29) (30) (31)      | (30) |  |
| RDS2xSTB4    |  |      | (30)                |      |  |
| RDS2xSTB5    |  |      | (32)                |      |  |
| RDS2xSTP1    |  |      | (31) (32)           | (29) |  |
| RDS2xSUT1    |  |      | (31)                |      |  |
| RDS2xTYE7    |  |      | (31) (32)           |      |  |
| RDS2xYJL103C |  |      | (30)                |      |  |
| RDS2xYPL230W |  |      | (29) (30) (31)      | (30) |  |
| RDS2xYPR196W |  |      | (30) (31)           |      |  |
| RDS2xZMS1    |  |      | (29) (30) (31)      |      |  |
| REB1xRGM1    |  |      | (32)                |      |  |
| REB1xSTB1    |  |      | (31)                | (30) |  |
| REB1xSTB2    |  | (34) |                     | (30) |  |
| REB1xSTB5    |  |      | (32)                |      |  |
| REB1xSTP2    |  |      | (31)                |      |  |
| REB1xSUM1    |  |      | (32)                | (29) |  |
| REB1xTBF1    |  |      | (29)                |      |  |
| REB1xYER184C |  |      | (32)                |      |  |
| REB1xYPR196W |  |      | (29)                |      |  |
| REB1xYRM1    |  |      | (29)                |      |  |
| RGM1xRSC3    |  |      | (29) (30) (31)      | (30) |  |
| RGM1xSKN7    |  |      | (30) (31)           |      |  |
| RGM1xSOK2    |  |      | (31) (32)           |      |  |
| RGM1xSTP1    |  |      | (29) (30) (31) (32) | (30) |  |
| RGM1xTBF1    |  |      | (30)                | (30) |  |
| RGM1xUGA3    |  |      | (29) (30) (31)      |      |  |
| RGM1xUME6    |  |      | (30) (31) (32)      |      |  |
| RGM1xYDR026C |  |      | (30) (31) (32)      | (30) |  |
| RGM1xYER130C |  |      | (32)                |      |  |
| RGT1xRSC3    |  |      | (30) (31)           |      |  |

|              |      |                |           |  |
|--------------|------|----------------|-----------|--|
| RGT1xSKN7    |      | (32)           |           |  |
| RGT1xSTB3    | (34) |                |           |  |
| RGT1xSTP1    |      | (32)           |           |  |
| RGT1xUGA3    |      | (31)           |           |  |
| RGT1xUME6    |      | (32)           |           |  |
| RGT1xYRM1    |      | (31)           | (30)      |  |
| RGT1xZMS1    |      | (31)           |           |  |
| RPH1xRSC3    |      | (31)           |           |  |
| RPH1xYER130C |      | (30) (31) (32) |           |  |
| RPN4xUME6    |      | (30) (31) (32) |           |  |
| RSC30xSUT1   | (35) |                |           |  |
| RSC30xUME6   |      | (29) (31)      | (30) (29) |  |
| RSC30xYRM1   |      | (29) (30) (31) |           |  |
| RSC30xZMS1   |      | (31)           |           |  |
| RSC3xRTG3    |      | (29)           |           |  |
| RSC3xSKN7    |      | (31)           |           |  |
| RSC3xSTB5    |      | (31)           |           |  |
| RSC3xSTP1    |      | (29)           | (29)      |  |
| RSC3xSTP2    |      | (29)           |           |  |
| RSC3xSUT1    |      | (30) (31)      |           |  |
| RSC3xSWI5    |      | (29)           |           |  |
| RSC3xSWI6    |      | (29) (31)      |           |  |
| RSC3xXBP1    |      | (31)           |           |  |
| RSC3xYLL054C |      | (31)           |           |  |
| RSC3xYPL230W |      | (29) (30) (31) | (30)      |  |
| RSC3xYPR196W |      | (31)           | (30) (29) |  |
| RSC3xYRM1    |      | (29) (30) (31) |           |  |
| RSC3xZMS1    |      | (29) (30) (31) |           |  |
| RTG3xSTB1    |      | (29) (30) (32) | (30) (29) |  |
| RTG3xSWI4    |      | (29) (30) (32) | (29)      |  |
| SFP1xTYE7    |      | (32)           |           |  |
| SIP4xSKN7    | (35) |                |           |  |
| SKN7xSTB4    |      | (29)           |           |  |
| SKN7xSTB5    |      | (32)           |           |  |
| SKN7xSUT2    |      | (30) (32)      |           |  |
| SKN7xYDR520C |      | (31)           |           |  |
| SKN7xYER184C |      | (29) (31)      |           |  |
| SKN7xYPL230W |      | (30) (31)      |           |  |
| SKO1xSUM1    |      | (30) (32)      |           |  |
| SNT2xSTP3    | (34) |                |           |  |
| SOK2xYPL230W |      | (31) (32)      |           |  |

|              |      |      |                     |      |  |
|--------------|------|------|---------------------|------|--|
| SOK2xZMS1    |      |      | (32)                |      |  |
| SPT15xUPC2   |      |      | (29) (30) (31)      |      |  |
| SPT23xSTB3   |      |      | (29)                |      |  |
| SRD1xYER130C |      |      | (30) (31)           |      |  |
| STB1xSTB3    |      |      | (30) (31)           | (29) |  |
| STB1xSTP1    |      |      | (32)                |      |  |
| STB1xSUT1    |      |      | (29) (32)           |      |  |
| STB1xUGA3    |      |      | (29) (32)           |      |  |
| STB1xYDR026C |      |      | (32)                |      |  |
| STB1xYER184C |      |      | (29)                |      |  |
| STB1xYRM1    |      |      | (29)                |      |  |
| STB2xSTP1    |      |      | (32)                |      |  |
| STB2xSTP2    |      |      | (31) (32)           |      |  |
| STB2xSUM1    | (27) |      |                     |      |  |
| STB2xSUT1    |      |      | (32)                |      |  |
| STB2xTYE7    | (27) |      |                     |      |  |
| STB2xUME6    |      |      | (29)                |      |  |
| STB2xYDR026C |      |      | (32)                |      |  |
| STB2xZMS1    |      |      | (32)                |      |  |
| STB3xSWI4    |      |      | (30) (31)           | (29) |  |
| STB3xXBP1    |      |      | (30) (32)           |      |  |
| STB3xYDR026C |      |      | (29)                |      |  |
| STB3xYRR1    |      | (35) |                     |      |  |
| STB4xSTB5    | (27) |      |                     |      |  |
| STB4xSUT1    |      |      | (32)                |      |  |
| STB4xSUT2    |      |      | (32)                |      |  |
| STB4xYJL103C |      |      | (29) (32)           |      |  |
| STB5xSTP2    |      |      | (30) (31) (32)      |      |  |
| STB5xSUT1    |      |      | (31)                |      |  |
| STB5xSUT2    |      |      | (30)                |      |  |
| STB5xYDR520C |      |      | (30) (31) (32)      |      |  |
| STP1xSWI6    |      |      | (32)                |      |  |
| STP1xTYE7    |      |      | (31) (32)           |      |  |
| STP1xYLL054C |      |      | (29)                |      |  |
| STP1xYPL230W |      |      | (29) (30) (31)      | (30) |  |
| STP2xSUM1    |      |      | (32)                |      |  |
| STP2xSUT1    |      |      | (29) (30) (31) (32) |      |  |
| STP2xYER184C |      |      | (32)                |      |  |
| STP2xYJL103C |      |      | (30)                |      |  |
| STP3xSUT1    |      |      | (29) (31)           |      |  |
| SUT1xSUT2    |      |      | (30) (31) (32)      | (29) |  |

|                 |  |      |                |           |  |
|-----------------|--|------|----------------|-----------|--|
| SUT1xTYE7       |  |      | (29) (31) (32) |           |  |
| SUT1xUGA3       |  |      | (30) (31)      |           |  |
| SUT1xUME6       |  |      | (30) (31) (32) | (30)      |  |
| SUT1xYDR520C    |  |      | (32)           |           |  |
| SUT1xYRM1       |  |      | (30) (31)      |           |  |
| SUT2xXBP1       |  |      | (32)           |           |  |
| SUT2xYER184C    |  |      | (30) (32)      |           |  |
| SUT2xZMS1       |  |      | (30) (31) (32) |           |  |
| SWI4xYDR026C    |  |      | (32)           |           |  |
| SWI6xUGA3       |  |      | (29) (31)      |           |  |
| TBF1xTYE7       |  |      | (29)           |           |  |
| TBF1xYDR026C    |  |      | (29)           |           |  |
| TBF1xYPL230W    |  |      | (30)           | (30)      |  |
| TEC1xUPC2       |  |      | (31)           | (30) (29) |  |
| TEC1xYER130C    |  |      | (30) (32)      |           |  |
| TYE7xUME6       |  | (35) |                | (29)      |  |
| TYE7xYER184C    |  | (35) |                |           |  |
| TYE7xYJL103C    |  | (35) |                |           |  |
| UGA3xYPL230W    |  |      | (29) (30) (31) |           |  |
| UME6xYPL230W    |  |      | (30) (31)      |           |  |
| XBP1xYBL054W    |  |      | (31) (32)      |           |  |
| YDR026CxYER130C |  |      | (29)           |           |  |
| YDR026CxYER184C |  |      | (29) (32)      |           |  |
| YDR026CxYJL103C |  |      | (29) (32)      |           |  |
| YDR026CxYPL230W |  |      | (30) (31) (32) | (30)      |  |
| YER130CxZMS1    |  |      | (30) (31)      | (30) (29) |  |
| YER184CxYJL103C |  |      | (32)           |           |  |
| YER184CxZMS1    |  |      | (31)           |           |  |
| YPL230WxZMS1    |  |      | (30) (31) (32) | (30)      |  |
| YRM1xZMS1       |  |      | (30)           |           |  |
| ABF1xAFT2       |  |      |                |           |  |
| ABF1xCRZ1       |  |      |                |           |  |
| ABF1xGIS1       |  |      |                |           |  |
| ABF1xHAP3       |  |      |                |           |  |
| ABF1xMET28      |  |      |                |           |  |
| ABF1xMIG3       |  |      |                |           |  |
| ABF1xPHO4       |  |      |                |           |  |

|               |  |  |  |  |  |
|---------------|--|--|--|--|--|
| ABF1xRSC3     |  |  |  |  |  |
| ABF1xRSC30    |  |  |  |  |  |
| ABF1xSKO1     |  |  |  |  |  |
| ABF1xSTB2     |  |  |  |  |  |
| ABF1xSTP2     |  |  |  |  |  |
| ABF1xYJL103C  |  |  |  |  |  |
| ABF1xYLL054C  |  |  |  |  |  |
| ABF1xZMS1     |  |  |  |  |  |
| ACA1xOPI1     |  |  |  |  |  |
| ACA1xRSC3     |  |  |  |  |  |
| ACA1xYER184C  |  |  |  |  |  |
| ACA1xYJL103C  |  |  |  |  |  |
| ACA1xYLL054C  |  |  |  |  |  |
| ACE2xMET31    |  |  |  |  |  |
| AFT2xMET31    |  |  |  |  |  |
| ARG81xOPI1    |  |  |  |  |  |
| ARG81xRSC3    |  |  |  |  |  |
| ARG81xRSC30   |  |  |  |  |  |
| ARG81xSTB4    |  |  |  |  |  |
| ARG81xUME6    |  |  |  |  |  |
| ARO80xMIG1    |  |  |  |  |  |
| ARO80xRDR1    |  |  |  |  |  |
| ARO80xRDS1    |  |  |  |  |  |
| ARO80xRSC3    |  |  |  |  |  |
| ARO80xSTB4    |  |  |  |  |  |
| ARO80xSUT1    |  |  |  |  |  |
| ARO80xYER184C |  |  |  |  |  |
| ARR1xNHP6B    |  |  |  |  |  |
| ASH1xDAL82    |  |  |  |  |  |
| ASH1xNHP10    |  |  |  |  |  |
| ASH1xRSC3     |  |  |  |  |  |
| AZF1xECM23    |  |  |  |  |  |
| AZF1xEDS1     |  |  |  |  |  |
| CAD1xUSV1     |  |  |  |  |  |
| CAD1xYKL222C  |  |  |  |  |  |
| CAT8xLYS14    |  |  |  |  |  |
| CAT8xOPI1     |  |  |  |  |  |
| CAT8xREB1     |  |  |  |  |  |
| CAT8xSTB1     |  |  |  |  |  |
| CAT8xSTB2     |  |  |  |  |  |
| CAT8xYBL054W  |  |  |  |  |  |

|              |  |  |  |  |  |
|--------------|--|--|--|--|--|
| CAT8xYDR520C |  |  |  |  |  |
| CBF1xDAL82   |  |  |  |  |  |
| CBF1xRSC3    |  |  |  |  |  |
| CBF1xTBF1    |  |  |  |  |  |
| CBF1xYLL054C |  |  |  |  |  |
| CEP3xSTB3    |  |  |  |  |  |
| CIN5xHMRA2   |  |  |  |  |  |
| CIN5xREB1    |  |  |  |  |  |
| CIN5xYDR026C |  |  |  |  |  |
| CRZ1xPDR1    |  |  |  |  |  |
| CRZ1xSWI5    |  |  |  |  |  |
| CST6xNDD1    |  |  |  |  |  |
| CUP9xECM23   |  |  |  |  |  |
| CUP9xGAT3    |  |  |  |  |  |
| DAL82xEDS1   |  |  |  |  |  |
| DAL82xOPI1   |  |  |  |  |  |
| DAL82xSTB2   |  |  |  |  |  |
| DAL82xSTB3   |  |  |  |  |  |
| ECM23xMET32  |  |  |  |  |  |
| EDS1xRDR1    |  |  |  |  |  |
| EDS1xSTP1    |  |  |  |  |  |
| EDS1xYRM1    |  |  |  |  |  |
| FHL1xOPI1    |  |  |  |  |  |
| FHL1xSTP2    |  |  |  |  |  |
| GAL4xGIS1    |  |  |  |  |  |
| GAL4xRSC3    |  |  |  |  |  |
| GAL4xSUT1    |  |  |  |  |  |
| GAL4xYJL103C |  |  |  |  |  |
| GAL4xYPL230W |  |  |  |  |  |
| GAL80xPDR1   |  |  |  |  |  |
| GAL80xRSC3   |  |  |  |  |  |
| GAT3xRSC30   |  |  |  |  |  |
| GAT4xMET32   |  |  |  |  |  |
| GCR2xRDR1    |  |  |  |  |  |
| GCR2xRFX1    |  |  |  |  |  |
| GIS1xMSN2    |  |  |  |  |  |
| GIS1xREB1    |  |  |  |  |  |
| GIS1xYER130C |  |  |  |  |  |
| GIS1xYLL054C |  |  |  |  |  |
| GSM1xYJL103C |  |  |  |  |  |
| GTS1xMET4    |  |  |  |  |  |

|                     |  |  |  |  |  |
|---------------------|--|--|--|--|--|
| HAC1xMBP1           |  |  |  |  |  |
| HAC1xSUT1           |  |  |  |  |  |
| HAP1xNHP10          |  |  |  |  |  |
| HAP1xPDR3           |  |  |  |  |  |
| HAP1xUGA3           |  |  |  |  |  |
| HAP2xRSC3           |  |  |  |  |  |
| HAP4xRSC3           |  |  |  |  |  |
| HAP5xUGA3           |  |  |  |  |  |
| HAP5xYBL054W        |  |  |  |  |  |
| HCM1xNDD1           |  |  |  |  |  |
| HMRA2xMATALP<br>HA2 |  |  |  |  |  |
| HMRA2xNHP6A         |  |  |  |  |  |
| HMRA2xSPT15         |  |  |  |  |  |
| IME1xSKN7           |  |  |  |  |  |
| IME1xSTB2           |  |  |  |  |  |
| IME1xYLL054C        |  |  |  |  |  |
| INO2xPHD1           |  |  |  |  |  |
| INO2xPHO4           |  |  |  |  |  |
| INO2xYLL054C        |  |  |  |  |  |
| INO4xSTB2           |  |  |  |  |  |
| INO4xYDR026C        |  |  |  |  |  |
| LEU3xRSC3           |  |  |  |  |  |
| LEU3xTYE7           |  |  |  |  |  |
| LYS14xMCM1          |  |  |  |  |  |
| LYS14xSKN7          |  |  |  |  |  |
| MATALPHA2xNH<br>P6A |  |  |  |  |  |
| MATALPHA2xSP<br>T15 |  |  |  |  |  |
| MATALPHA2xTY<br>E7  |  |  |  |  |  |
| MBP1xRDS2           |  |  |  |  |  |
| MBP1xRSC3           |  |  |  |  |  |
| MBP1xSUM1           |  |  |  |  |  |
| MCM1xNHP10          |  |  |  |  |  |
| MCM1xPDR1           |  |  |  |  |  |
| MCM1xRSC3           |  |  |  |  |  |
| MCM1xSIP4           |  |  |  |  |  |
| MCM1xSUT1           |  |  |  |  |  |
| MCM1xYLL054C        |  |  |  |  |  |
| MET28xRSC3          |  |  |  |  |  |

|               |  |  |  |  |  |
|---------------|--|--|--|--|--|
| MET28xTYE7    |  |  |  |  |  |
| MET31xRDS1    |  |  |  |  |  |
| MET4xRSC3     |  |  |  |  |  |
| MIG1xNHP10    |  |  |  |  |  |
| MIG1xRDS2     |  |  |  |  |  |
| MIG1xREB1     |  |  |  |  |  |
| MIG1xRSC3     |  |  |  |  |  |
| MIG1xRSC30    |  |  |  |  |  |
| MIG1xYBL054W  |  |  |  |  |  |
| MIG1xYLL054C  |  |  |  |  |  |
| MIG2xSUT2     |  |  |  |  |  |
| MIG2xYAP7     |  |  |  |  |  |
| MIG2xYJL103C  |  |  |  |  |  |
| MIG3xRDS2     |  |  |  |  |  |
| MIG3xREB1     |  |  |  |  |  |
| MIG3xYDR026C  |  |  |  |  |  |
| MIG3xYLL054C  |  |  |  |  |  |
| MSN2xRGM1     |  |  |  |  |  |
| MSN2xYPL230W  |  |  |  |  |  |
| MSN4xREB1     |  |  |  |  |  |
| NDD1xRSC3     |  |  |  |  |  |
| NDD1xRSC30    |  |  |  |  |  |
| NDD1xSTP1     |  |  |  |  |  |
| NDD1xSTP2     |  |  |  |  |  |
| NDT80xSKN7    |  |  |  |  |  |
| NHP10xPDR8    |  |  |  |  |  |
| NHP10xRSC3    |  |  |  |  |  |
| NHP10xRSC30   |  |  |  |  |  |
| NHP10xYBL054W |  |  |  |  |  |
| NHP10xYPR196W |  |  |  |  |  |
| NHP6AxRLM1    |  |  |  |  |  |
| NRG1xRDS1     |  |  |  |  |  |
| OAF1xTYE7     |  |  |  |  |  |
| OAF1xYJL103C  |  |  |  |  |  |
| OPI1xRDS2     |  |  |  |  |  |
| OPI1xSTP3     |  |  |  |  |  |
| OPI1xYDR026C  |  |  |  |  |  |
| OPI1xYER184C  |  |  |  |  |  |
| OPI1xYJL103C  |  |  |  |  |  |
| PBF2xRTG1     |  |  |  |  |  |
| PBF2xXBP1     |  |  |  |  |  |



|              |  |  |  |  |  |
|--------------|--|--|--|--|--|
| PBF2xYBL054W |  |  |  |  |  |
| PDR1xRDS2    |  |  |  |  |  |
| PDR1xRTG3    |  |  |  |  |  |
| PDR1xSKN7    |  |  |  |  |  |
| PDR1xSTB2    |  |  |  |  |  |
| PDR1xSTB4    |  |  |  |  |  |
| PDR1xYLL054C |  |  |  |  |  |
| PDR3xSKN7    |  |  |  |  |  |
| PDR3xSTB5    |  |  |  |  |  |
| PDR3xTYE7    |  |  |  |  |  |
| PDR8xRSC3    |  |  |  |  |  |
| PDR8xRSC30   |  |  |  |  |  |
| PDR8xSTB1    |  |  |  |  |  |
| PHD1xRSC30   |  |  |  |  |  |
| PHD1xYDR026C |  |  |  |  |  |
| PHO4xRDS1    |  |  |  |  |  |
| PHO4xREB1    |  |  |  |  |  |
| PHO4xSTB2    |  |  |  |  |  |
| PHO4xTBF1    |  |  |  |  |  |
| PHO4xYLL054C |  |  |  |  |  |
| PHO4xYRM1    |  |  |  |  |  |
| RAP1xYLL054C |  |  |  |  |  |
| RDR1xRGT1    |  |  |  |  |  |
| RDR1xRSC3    |  |  |  |  |  |
| RDR1xRSC30   |  |  |  |  |  |
| RDR1xSKN7    |  |  |  |  |  |
| RDR1xYRM1    |  |  |  |  |  |
| RDS1xSWI6    |  |  |  |  |  |
| RDS1xXBP1    |  |  |  |  |  |
| RDS1xYLL054C |  |  |  |  |  |
| RDS2xSNT2    |  |  |  |  |  |
| RDS2xSTB3    |  |  |  |  |  |
| RDS2xYDR026C |  |  |  |  |  |
| REB1xRSC3    |  |  |  |  |  |
| REB1xRSC30   |  |  |  |  |  |
| REB1xSNT2    |  |  |  |  |  |
| REB1xSUT1    |  |  |  |  |  |
| REB1xTYE7    |  |  |  |  |  |
| REB1xYDR026C |  |  |  |  |  |
| REB1xYJL103C |  |  |  |  |  |
| REB1xYPL230W |  |  |  |  |  |

|               |  |  |  |  |      |
|---------------|--|--|--|--|------|
| REB1xYRR1     |  |  |  |  |      |
| REB1xZMS1     |  |  |  |  |      |
| RFX1xRSC3     |  |  |  |  |      |
| RGM1xYLL054C  |  |  |  |  |      |
| RGT1xSTB1     |  |  |  |  |      |
| RGT1xSUT2     |  |  |  |  |      |
| RLM1xSPT15    |  |  |  |  |      |
| RPH1xSTP3     |  |  |  |  |      |
| RSC30xRSC3    |  |  |  |  | (59) |
| RSC30xSKN7    |  |  |  |  |      |
| RSC30xSTB2    |  |  |  |  |      |
| RSC30xSTP1    |  |  |  |  |      |
| RSC30xSTP2    |  |  |  |  |      |
| RSC30xUGA3    |  |  |  |  |      |
| RSC30xYER051W |  |  |  |  |      |
| RSC30xYER184C |  |  |  |  |      |
| RSC30xYJL103C |  |  |  |  |      |
| RSC3xSTB1     |  |  |  |  |      |
| RSC3xSTB2     |  |  |  |  |      |
| RSC3xSUT2     |  |  |  |  |      |
| RSC3xSWI4     |  |  |  |  |      |
| RSC3xTHI2     |  |  |  |  |      |
| RSC3xUGA3     |  |  |  |  |      |
| RSC3xUME6     |  |  |  |  |      |
| RSC3xYBL054W  |  |  |  |  |      |
| RSC3xYDR026C  |  |  |  |  |      |
| RSC3xYER051W  |  |  |  |  |      |
| RSC3xYER184C  |  |  |  |  |      |
| RSC3xYJL103C  |  |  |  |  |      |
| SKN7xYBL054W  |  |  |  |  |      |
| SKN7xYDR026C  |  |  |  |  |      |
| SKN7xYLL054C  |  |  |  |  |      |
| SKN7xYRM1     |  |  |  |  |      |
| SNT2xSTB2     |  |  |  |  |      |
| SNT2xYER184C  |  |  |  |  |      |
| STB1xYLL054C  |  |  |  |  |      |
| STB2xTBF1     |  |  |  |  |      |
| STB2xYJL103C  |  |  |  |  |      |
| STB5xYER184C  |  |  |  |  |      |
| STB5xYJL103C  |  |  |  |  |      |
| STP1xSTP3     |  |  |  |  |      |

|                 |  |  |  |  |  |
|-----------------|--|--|--|--|--|
| STP1xYDR026C    |  |  |  |  |  |
| STP2xYLL054C    |  |  |  |  |  |
| SUT1xYDR026C    |  |  |  |  |  |
| SUT1xYLL054C    |  |  |  |  |  |
| SUT2xYJL103C    |  |  |  |  |  |
| SWI4xYLL054C    |  |  |  |  |  |
| SWI5xYLL054C    |  |  |  |  |  |
| TBF1xYRR1       |  |  |  |  |  |
| TYE7xUGA3       |  |  |  |  |  |
| TYE7xYDR026C    |  |  |  |  |  |
| TYE7xYDR520C    |  |  |  |  |  |
| TYE7xYLL054C    |  |  |  |  |  |
| TYE7xYRM1       |  |  |  |  |  |
| TYE7xYRR1       |  |  |  |  |  |
| UGA3xYLL054C    |  |  |  |  |  |
| UME6xYDR026C    |  |  |  |  |  |
| UME6xYLL054C    |  |  |  |  |  |
| YBL054WxYLL054C |  |  |  |  |  |
| YDR026CxYLL054C |  |  |  |  |  |
| YDR026CxZMS1    |  |  |  |  |  |
| YDR520CxZMS1    |  |  |  |  |  |
| YER130CxYPL230W |  |  |  |  |  |
| YER184CxYLL054C |  |  |  |  |  |
| YER184CxYRM1    |  |  |  |  |  |
| YJL103CxYLL054C |  |  |  |  |  |
| YJL103CxYRM1    |  |  |  |  |  |
| YKL222CxYRM1    |  |  |  |  |  |
| YLL054CxYPL230W |  |  |  |  |  |
| YLL054CxZMS1    |  |  |  |  |  |

## References

1. Gertz, J., Siggia, E.D. and Cohen, B.A. (2009) Analysis of combinatorial cis-regulation in synthetic and genomic promoters. *Nature*, **457**, 215-218.

2. Pilpel, Y., Sudarsanam, P. and Church, G.M. (2001) Identifying regulatory networks by combinatorial analysis of promoter elements. *Nat Genet*, **29**, 153-159.
3. Parker, D.S., White, M.A., Ramos, A.I., Cohen, B.A. and Barolo, S. (2011) The cis-regulatory logic of Hedgehog gradient responses: key roles for gli binding affinity, competition, and cooperativity. *Science signaling*, **4**, ra38.
4. Yuh, C.H., Bolouri, H. and Davidson, E.H. (1998) Genomic cis-regulatory logic: experimental and computational analysis of a sea urchin gene. *Science*, **279**, 1896-1902.
5. Gertz, J. and Cohen, B.A. (2009) Environment-specific combinatorial cis-regulation in synthetic promoters. *Molecular systems biology*, **5**, 244.
6. Pettersson, M. and Schaffner, W. (1990) Synergistic activation of transcription by multiple binding sites for NF-kappa B even in absence of co-operative factor binding to DNA. *Journal of molecular biology*, **214**, 373-380.
7. Aguilar, D. and Oliva, B. (2008) Topological comparison of methods for predicting transcriptional cooperativity in yeast. *BMC genomics*, **9**, 137.
8. Drazinic, C.M., Smerage, J.B., Lopez, M.C. and Baker, H.V. (1996) Activation mechanism of the multifunctional transcription factor repressor-activator protein 1 (Rap1p). *Mol Cell Biol*, **16**, 3187-3196.
9. Magbanua, J.P., Ogawa, N., Harashima, S. and Oshima, Y. (1997) The transcriptional activators of the PHO regulon, Pho4p and Pho2p, interact directly with each other and with components of the basal transcription machinery in *Saccharomyces cerevisiae*. *Journal of biochemistry*, **121**, 1182-1189.
10. Yu, X., Lin, J., Masuda, T., Esumi, N., Zack, D.J. and Qian, J. (2006) Genome-wide prediction and characterization of interactions between transcription factors in *Saccharomyces cerevisiae*. *Nucleic Acids Res*, **34**, 917-927.
11. Tirosch, I., Berman, J. and Barkai, N. (2007) The pattern and evolution of yeast promoter bendability. *Trends in genetics : TIG*, **23**, 318-321.
12. Shea, M.A. and Ackers, G.K. (1985) The OR control system of bacteriophage lambda. A physical-chemical model for gene regulation. *Journal of molecular biology*, **181**, 211-230.
13. Banerjee, N. and Zhang, M.Q. (2003) Identifying cooperativity among transcription factors controlling the cell cycle in yeast. *Nucleic Acids Res*, **31**, 7024-7031.
14. Beer, M.A. and Tavazoie, S. (2004) Predicting gene expression from sequence. *Cell*, **117**, 185-198.
15. GuhaThakurta, D. and Stormo, G.D. (2001) Identifying target sites for cooperatively binding factors. *Bioinformatics*, **17**, 608-621.

16. Wang, Y., Zhang, X.S. and Xia, Y. (2009) Predicting eukaryotic transcriptional cooperativity by Bayesian network integration of genome-wide data. *Nucleic Acids Res*, **37**, 5943-5958.
17. Kellis, M., Patterson, N., Endrizzi, M., Birren, B. and Lander, E.S. (2003) Sequencing and comparison of yeast species to identify genes and regulatory elements. *Nature*, **423**, 241-254.
18. Doniger, S.W. and Fay, J.C. (2007) Frequent gain and loss of functional transcription factor binding sites. *PLoS computational biology*, **3**, e99.
19. Moses, A.M., Pollard, D.A., Nix, D.A., Iyer, V.N., Li, X.Y., Biggin, M.D. and Eisen, M.B. (2006) Large-scale turnover of functional transcription factor binding sites in *Drosophila*. *PLoS computational biology*, **2**, e130.
20. Odom, D.T., Dowell, R.D., Jacobsen, E.S., Gordon, W., Danford, T.W., MacIsaac, K.D., Rolfe, P.A., Conboy, C.M., Gifford, D.K. and Fraenkel, E. (2007) Tissue-specific transcriptional regulation has diverged significantly between human and mouse. *Nat Genet*, **39**, 730-732.
21. Tuch, B.B., Galgoczy, D.J., Hernday, A.D., Li, H. and Johnson, A.D. (2008) The evolution of combinatorial gene regulation in fungi. *PLoS Biol*, **6**, e38.
22. Kim, J., He, X. and Sinha, S. (2009) Evolution of regulatory sequences in 12 *Drosophila* species. *PLoS genetics*, **5**, e1000330.
23. He, Q., Bardet, A.F., Patton, B., Purvis, J., Johnston, J., Paulson, A., Gogol, M., Stark, A. and Zeitlinger, J. (2011) High conservation of transcription factor binding and evidence for combinatorial regulation across six *Drosophila* species. *Nat Genet*, **43**, 414-420.
24. Spivak, A.T. and Stormo, G.D. (2012) ScerTF: a comprehensive database of benchmarked position weight matrices for *Saccharomyces* species. *Nucleic Acids Res*, **40**, D162-168.
25. Sarafova, S. and Siu, G. (2000) Precise arrangement of factor-binding sites is required for murine CD4 promoter function. *Nucleic Acids Res*, **28**, 2664-2671.
26. Harbison, C.T., Gordon, D.B., Lee, T.I., Rinaldi, N.J., Macisaac, K.D., Danford, T.W., Hannett, N.M., Tagne, J.B., Reynolds, D.B., Yoo, J. *et al.* (2004) Transcriptional regulatory code of a eukaryotic genome. *Nature*, **431**, 99-104.
27. Lee, T.I., Rinaldi, N.J., Robert, F., Odom, D.T., Bar-Joseph, Z., Gerber, G.K., Hannett, N.M., Harbison, C.T., Thompson, C.M., Simon, I. *et al.* (2002) Transcriptional regulatory networks in *Saccharomyces cerevisiae*. *Science*, **298**, 799-804.
28. Venters, B.J., Wachi, S., Mavrich, T.N., Andersen, B.E., Jena, P., Sinnamon, A.J., Jain, P., Roller, N.S., Jiang, C., Hemeryck-Walsh, C. *et al.* (2011) A comprehensive genomic binding map of gene and chromatin regulatory proteins in *Saccharomyces*. *Mol Cell*, **41**, 480-492.

29. Pramila, T., Wu, W., Miles, S., Noble, W.S. and Breeden, L.L. (2006) The Forkhead transcription factor Hcm1 regulates chromosome segregation genes and fills the S-phase gap in the transcriptional circuitry of the cell cycle. *Genes Dev*, **20**, 2266-2278.
30. Gasch, A.P., Spellman, P.T., Kao, C.M., Carmel-Harel, O., Eisen, M.B., Storz, G., Botstein, D. and Brown, P.O. (2000) Genomic expression programs in the response of yeast cells to environmental changes. *Mol Biol Cell*, **11**, 4241-4257.
31. Hughes, T.R., Marton, M.J., Jones, A.R., Roberts, C.J., Stoughton, R., Armour, C.D., Bennett, H.A., Coffey, E., Dai, H., He, Y.D. *et al.* (2000) Functional discovery via a compendium of expression profiles. *Cell*, **102**, 109-126.
32. Reimand, J., Vaquerizas, J.M., Todd, A.E., Vilo, J. and Luscombe, N.M. (2010) Comprehensive reanalysis of transcription factor knockout expression data in *Saccharomyces cerevisiae* reveals many new targets. *Nucleic Acids Res*, **38**, 4768-4777.
33. Hu, Z., Killion, P.J. and Iyer, V.R. (2007) Genetic reconstruction of a functional transcriptional regulatory network. *Nat Genet*, **39**, 683-687.
34. Ashburner, M., Ball, C.A., Blake, J.A., Botstein, D., Butler, H., Cherry, J.M., Davis, A.P., Dolinski, K., Dwight, S.S., Eppig, J.T. *et al.* (2000) Gene ontology: tool for the unification of biology. The Gene Ontology Consortium. *Nat Genet*, **25**, 25-29.
35. Kanehisa, M. and Goto, S. (2000) KEGG: kyoto encyclopedia of genes and genomes. *Nucleic Acids Res*, **28**, 27-30.
36. Liko, D., Slattery, M.G. and Heideman, W. (2007) Stb3 binds to ribosomal RNA processing element motifs that control transcriptional responses to growth in *Saccharomyces cerevisiae*. *The Journal of biological chemistry*, **282**, 26623-26628.
37. Zhu, C., Byers, K.J., McCord, R.P., Shi, Z., Berger, M.F., Newburger, D.E., Saulrieta, K., Smith, Z., Shah, M.V., Radhakrishnan, M. *et al.* (2009) High-resolution DNA-binding specificity analysis of yeast transcription factors. *Genome Res*, **19**, 556-566.
38. Tavazoie, S., Hughes, J.D., Campbell, M.J., Cho, R.J. and Church, G.M. (1999) Systematic determination of genetic network architecture. *Nat Genet*, **22**, 281-285.
39. Koch, C., Moll, T., Neuberg, M., Ahorn, H. and Nasmyth, K. (1993) A role for the transcription factors Mbp1 and Swi4 in progression from G1 to S phase. *Science*, **261**, 1551-1557.
40. de Bruin, R.A., Kalashnikova, T.I. and Wittenberg, C. (2008) Stb1 collaborates with other regulators to modulate the G1-specific transcriptional circuit. *Mol Cell Biol*, **28**, 6919-6928.
41. Ho, Y., Costanzo, M., Moore, L., Kobayashi, R. and Andrews, B.J. (1999) Regulation of transcription at the *Saccharomyces cerevisiae* start transition by Stb1, a Swi6-binding protein. *Mol Cell Biol*, **19**, 5267-5278.

42. Wade, J.T., Hall, D.B. and Struhl, K. (2004) The transcription factor Ifh1 is a key regulator of yeast ribosomal protein genes. *Nature*, **432**, 1054-1058.
43. Jorgensen, P., Rupes, I., Sharom, J.R., Schneper, L., Broach, J.R. and Tyers, M. (2004) A dynamic transcriptional network communicates growth potential to ribosome synthesis and critical cell size. *Genes Dev*, **18**, 2491-2505.
44. Olson, K.A., Nelson, C., Tai, G., Hung, W., Yong, C., Astell, C. and Sadowski, I. (2000) Two regulators of Ste12p inhibit pheromone-responsive transcription by separate mechanisms. *Mol Cell Biol*, **20**, 4199-4209.
45. Chou, S., Lane, S. and Liu, H. (2006) Regulation of mating and filamentation genes by two distinct Ste12 complexes in *Saccharomyces cerevisiae*. *Mol Cell Biol*, **26**, 4794-4805.
46. Rubin-Bejerano, I., Mandel, S., Robzyk, K. and Kassir, Y. (1996) Induction of meiosis in *Saccharomyces cerevisiae* depends on conversion of the transcriptional repressor Ume6 to a positive regulator by its regulated association with the transcriptional activator Ime1. *Mol Cell Biol*, **16**, 2518-2526.
47. Coic, E., Sun, K., Wu, C. and Haber, J.E. (2006) Cell cycle-dependent regulation of *Saccharomyces cerevisiae* donor preference during mating-type switching by SBF (Swi4/Swi6) and Fkh1. *Mol Cell Biol*, **26**, 5470-5480.
48. Ho, Y., Gruhler, A., Heilbut, A., Bader, G.D., Moore, L., Adams, S.L., Millar, A., Taylor, P., Bennett, K., Boutilier, K. *et al.* (2002) Systematic identification of protein complexes in *Saccharomyces cerevisiae* by mass spectrometry. *Nature*, **415**, 180-183.
49. Yoon, S., Govind, C.K., Qiu, H., Kim, S.J., Dong, J. and Hinnebusch, A.G. (2004) Recruitment of the ArgR/Mcm1p repressor is stimulated by the activator Gcn4p: a self-checking activation mechanism. *Proc Natl Acad Sci U S A*, **101**, 11713-11718.
50. Joo, Y.J., Kim, J.A., Baek, J.H., Seong, K.M., Han, K.D., Song, J.M., Choi, J.Y. and Kim, J. (2009) Cooperative regulation of ADE3 transcription by Gcn4p and Bas1p in *Saccharomyces cerevisiae*. *Eukaryotic cell*, **8**, 1268-1277.
51. Ozcan, S. and Johnston, M. (1996) Two different repressors collaborate to restrict expression of the yeast glucose transporter genes HXT2 and HXT4 to low levels of glucose. *Mol Cell Biol*, **16**, 5536-5545.
52. Shahi, P., Gulshan, K., Naar, A.M. and Moye-Rowley, W.S. (2010) Differential roles of transcriptional mediator subunits in regulation of multidrug resistance gene expression in *Saccharomyces cerevisiae*. *Mol Biol Cell*, **21**, 2469-2482.
53. Zhu, G., Spellman, P.T., Volpe, T., Brown, P.O., Botstein, D., Davis, T.N. and Futcher, B. (2000) Two yeast forkhead genes regulate the cell cycle and pseudohyphal growth. *Nature*, **406**, 90-94.

54. Mead, J., Zhong, H., Acton, T.B. and Vershon, A.K. (1996) The yeast alpha2 and Mcm1 proteins interact through a region similar to a motif found in homeodomain proteins of higher eukaryotes. *Mol Cell Biol*, **16**, 2135-2143.
55. Pramila, T., Miles, S., GuhaThakurta, D., Jemiolo, D. and Breeden, L.L. (2002) Conserved homeodomain proteins interact with MADS box protein Mcm1 to restrict ECB-dependent transcription to the M/G1 phase of the cell cycle. *Genes Dev*, **16**, 3034-3045.
56. Kumar, R., Reynolds, D.M., Shevchenko, A., Goldstone, S.D. and Dalton, S. (2000) Forkhead transcription factors, Fkh1p and Fkh2p, collaborate with Mcm1p to control transcription required for M-phase. *Current biology : CB*, **10**, 896-906.
57. Graves, J.A. and Henry, S.A. (2000) Regulation of the yeast INO1 gene. The products of the INO2, INO4 and OPI1 regulatory genes are not required for repression in response to inositol. *Genetics*, **154**, 1485-1495.
58. Lee, T.A., Jorgensen, P., Bogner, A.L., Peyraud, C., Thomas, D. and Tyers, M. (2010) Dissection of combinatorial control by the Met4 transcriptional complex. *Mol Biol Cell*, **21**, 456-469.
59. Angus-Hill, M.L., Schlichter, A., Roberts, D., Erdjument-Bromage, H., Tempst, P. and Cairns, B.R. (2001) A Rsc3/Rsc30 zinc cluster dimer reveals novel roles for the chromatin remodeler RSC in gene expression and cell cycle control. *Mol Cell*, **7**, 741-751.
60. Menon, B.B., Sarma, N.J., Pasula, S., Deminoff, S.J., Willis, K.A., Barbara, K.E., Andrews, B. and Santangelo, G.M. (2005) Reverse recruitment: the Nup84 nuclear pore subcomplex mediates Rap1/Gcr1/Gcr2 transcriptional activation. *Proc Natl Acad Sci U S A*, **102**, 5749-5754.
61. Breitkreutz, B.J., Stark, C., Reguly, T., Boucher, L., Breitkreutz, A., Livstone, M., Oughtred, R., Lackner, D.H., Bahler, J., Wood, V. *et al.* (2008) The BioGRID Interaction Database: 2008 update. *Nucleic Acids Res*, **36**, D637-640.
62. Robinson, K.A., Koepke, J.I., Kharodawala, M. and Lopes, J.M. (2000) A network of yeast basic helix-loop-helix interactions. *Nucleic Acids Res*, **28**, 4460-4466.
63. Badis, G., Chan, E.T., van Bakel, H., Pena-Castillo, L., Tillo, D., Tsui, K., Carlson, C.D., Gossett, A.J., Hasinoff, M.J., Warren, C.L. *et al.* (2008) A library of yeast transcription factor motifs reveals a widespread function for Rsc3 in targeting nucleosome exclusion at promoters. *Mol Cell*, **32**, 878-887.
64. Cairns, B.R., Lorch, Y., Li, Y., Zhang, M., Lacomis, L., Erdjument-Bromage, H., Tempst, P., Du, J., Laurent, B. and Kornberg, R.D. (1996) RSC, an essential, abundant chromatin-remodeling complex. *Cell*, **87**, 1249-1260.



65. Krogan, N.J., Cagney, G., Yu, H., Zhong, G., Guo, X., Ignatchenko, A., Li, J., Pu, S., Datta, N., Tikuisis, A.P. *et al.* (2006) Global landscape of protein complexes in the yeast *Saccharomyces cerevisiae*. *Nature*, **440**, 637-643.
66. Zheng, J., Benschop, J.J., Shales, M., Kemmeren, P., Greenblatt, J., Cagney, G., Holstege, F., Li, H. and Krogan, N.J. (2010) Epistatic relationships reveal the functional organization of yeast transcription factors. *Molecular systems biology*, **6**, 420.
67. Cherry, J.M., Hong, E.L., Amundsen, C., Balakrishnan, R., Binkley, G., Chan, E.T., Christie, K.R., Costanzo, M.C., Dwight, S.S., Engel, S.R. *et al.* (2012) *Saccharomyces* Genome Database: the genomics resource of budding yeast. *Nucleic Acids Res*, **40**, D700-705.
68. Su, N.Y., Ouni, I., Papagiannis, C.V. and Kaiser, P. (2008) A dominant suppressor mutation of the *met30* cell cycle defect suggests regulation of the *Saccharomyces cerevisiae* Met4-Cbf1 transcription complex by Met32. *The Journal of biological chemistry*, **283**, 11615-11624.
69. Sudarsanam, P., Pilpel, Y. and Church, G.M. (2002) Genome-wide co-occurrence of promoter elements reveals a cis-regulatory cassette of rRNA transcription motifs in *Saccharomyces cerevisiae*. *Genome Res*, **12**, 1723-1731.
70. Hahn, S. and Young, E.T. (2011) Transcriptional regulation in *Saccharomyces cerevisiae*: transcription factor regulation and function, mechanisms of initiation, and roles of activators and coactivators. *Genetics*, **189**, 705-736.
71. Hollenhorst, P.C., Pietz, G. and Fox, C.A. (2001) Mechanisms controlling differential promoter-occupancy by the yeast forkhead proteins Fkh1p and Fkh2p: implications for regulating the cell cycle and differentiation. *Genes Dev*, **15**, 2445-2456.
