# Supplementary material for: Combinatorial Cis-regulation in Saccharomyces Species
Source: Oxford University Press journal article supplement (doi:10.1534/g3.115.024331), 2016-01-26
Supplement: 024331_tables2.zip [file 024331_tables2.zip]

Table S2. List of TF pairs identified from 7 Genome search, and number of co-occurrences in promoters for each species. (Data also available in TableS2.xls)

| TFPair         | Cer. | Klu. | Mik. | Par. | Cas. | Bay. | Kud. |     |
|----------------|------|------|------|------|------|------|------|-----|
| ABF1xACA1      | 197  | 399  | 274  | 153  | 225  | 303  | 286  |     |
| ABF1xAFT2      | 224  | 486  | 235  | 239  | 194  | 351  | 211  |     |
| ABF1xBAS1      | 166  | 508  | 301  | 172  | 169  | 318  | 238  |     |
| ABF1xCBF1      | 264  | 429  | 230  | 274  | 202  | 452  | 287  |     |
| ABF1xCRZ1      | 206  | 389  | 255  | 141  | 167  | 239  | 244  |     |
| ABF1xCST6      | 176  | 171  | 133  | 139  | 106  | 185  | 189  |     |
| ABF1xDIG1      | 74   | 50   | 38   | 47   | 24   | 49   | 30   |     |
| ABF1xGCN4      | 183  | 393  | 235  | 142  | 166  | 204  | 216  |     |
| ABF1xGIS1      | 522  | 559  | 344  | 583  | 444  | 717  | 513  |     |
| ABF1xHAC1      | 167  | 425  | 206  | 167  | 181  | 275  | 291  |     |
| ABF1xHAP3      | 9    | 2    | 3    | 10   | 6    | 9    | 8    |     |
| ABF1xHAP5      | 9    | 5    | 5    | 11   | 4    | 18   | 16   |     |
| ABF1xHMS1      | 130  | 132  | 94   | 141  | 114  | 259  | 130  |     |
| ABF1xHSF1      | 59   | 51   | 31   | 44   | 20   | 45   | 33   |     |
| ABF1xIME1      | 92   | 33   | 46   | 94   | 32   | 115  | 71   |     |
| ABF1xINO2      | 155  | 187  | 124  | 182  | 116  | 236  | 147  |     |
| ABF1xINO4      | 120  | 130  | 73   | 146  | 71   | 140  | 121  |     |
| ABF1xMATALPHA2 |      | 905  | 1080 | 550  | 932  | 659  | 862  | 707 |
| ABF1xMBP1      | 137  | 330  | 199  | 146  | 143  | 260  | 253  |     |
| ABF1xMET28     | 155  | 328  | 189  | 132  | 128  | 206  | 195  |     |
| ABF1xMIG1      | 228  | 383  | 261  | 242  | 176  | 436  | 241  |     |
| ABF1xMIG3      | 168  | 206  | 166  | 163  | 182  | 270  | 252  |     |
| ABF1xPDR1      | 201  | 367  | 226  | 148  | 173  | 215  | 240  |     |
| ABF1xPDR3      | 55   | 22   | 28   | 46   | 52   | 67   | 27   |     |
| ABF1xPHD1      | 170  | 395  | 237  | 134  | 188  | 290  | 237  |     |
| ABF1xPHO4      | 198  | 272  | 133  | 216  | 122  | 341  | 169  |     |
| ABF1xRDS1      | 122  | 92   | 84   | 121  | 83   | 224  | 138  |     |
| ABF1xREB1      | 127  | 201  | 143  | 135  | 136  | 177  | 180  |     |
| ABF1xRGM1      | 522  | 559  | 344  | 583  | 444  | 717  | 513  |     |
| ABF1xRPN4      | 153  | 174  | 99   | 162  | 76   | 173  | 126  |     |
| ABF1xRSC30     | 23   | 10   | 3    | 17   | 7    | 68   | 19   |     |

|              |     |     |     |     |     |     |     |
|--------------|-----|-----|-----|-----|-----|-----|-----|
| ABF1xRSC3    | 177 | 311 | 273 | 153 | 216 | 354 | 302 |
| ABF1xRTG3    | 155 | 373 | 222 | 154 | 159 | 246 | 199 |
| ABF1xSKN7    | 157 | 388 | 251 | 171 | 179 | 317 | 276 |
| ABF1xSKO1    | 165 | 453 | 232 | 189 | 141 | 327 | 248 |
| ABF1xSTB1    | 140 | 339 | 229 | 139 | 185 | 226 | 248 |
| ABF1xSTB2    | 117 | 295 | 191 | 133 | 150 | 181 | 220 |
| ABF1xSTB3    | 219 | 164 | 142 | 190 | 159 | 247 | 187 |
| ABF1xSTP1    | 181 | 326 | 187 | 159 | 186 | 315 | 246 |
| ABF1xSTP2    | 54  | 60  | 36  | 68  | 37  | 137 | 95  |
| ABF1xSUM1    | 70  | 68  | 41  | 81  | 75  | 82  | 69  |
| ABF1xSUT1    | 187 | 336 | 243 | 182 | 193 | 314 | 290 |
| ABF1xSWI4    | 215 | 342 | 232 | 135 | 168 | 261 | 232 |
| ABF1xSWI6    | 138 | 320 | 212 | 150 | 145 | 208 | 217 |
| ABF1xTBF1    | 192 | 370 | 209 | 152 | 175 | 233 | 185 |
| ABF1xTYE7    | 243 | 405 | 203 | 224 | 188 | 389 | 279 |
| ABF1xUME6    | 140 | 36  | 49  | 148 | 85  | 173 | 133 |
| ABF1xYDR026C | 144 | 180 | 101 | 160 | 99  | 191 | 120 |
| ABF1xYER184C | 238 | 394 | 294 | 164 | 224 | 354 | 296 |
| ABF1xYJL103C | 428 | 546 | 257 | 436 | 277 | 549 | 329 |
| ABF1xYLL054C | 16  | 28  | 2   | 26  | 21  | 83  | 27  |
| ABF1xYPR196W | 142 | 308 | 220 | 124 | 153 | 202 | 216 |
| ABF1xZAP1    | 6   | 6   | 1   | 8   | 1   | 2   | 2   |
| ABF1xZMS1    | 177 | 445 | 253 | 212 | 245 | 309 | 318 |
| ABF2xBBP1    | 315 | 587 | 575 | 344 | 298 | 278 | 517 |
| ACA1xAFT2    | 269 | 583 | 480 | 284 | 345 | 392 | 327 |
| ACA1xCAT8    | 194 | 539 | 442 | 174 | 329 | 290 | 343 |
| ACA1xGAL80   | 18  | 11  | 17  | 8   | 16  | 38  | 4   |
| ACA1xGCN4    | 223 | 477 | 335 | 151 | 283 | 241 | 279 |
| ACA1xGIS1    | 601 | 726 | 683 | 663 | 744 | 826 | 709 |
| ACA1xMET31   | 187 | 463 | 334 | 175 | 316 | 313 | 325 |
| ACA1xMIG1    | 265 | 579 | 421 | 280 | 302 | 483 | 358 |
| ACA1xMIG3    | 193 | 332 | 279 | 158 | 297 | 321 | 370 |
| ACA1xMSN2    | 214 | 532 | 544 | 244 | 398 | 300 | 396 |
| ACA1xMSN4    | 333 | 475 | 461 | 357 | 398 | 462 | 396 |
| ACA1xNHP10   | 62  | 87  | 62  | 47  | 72  | 105 | 97  |

|              |     |     |     |     |     |     |     |
|--------------|-----|-----|-----|-----|-----|-----|-----|
| ACA1xOPI1    | 52  | 111 | 52  | 58  | 95  | 49  | 58  |
| ACA1xPHD1    | 208 | 574 | 450 | 162 | 352 | 363 | 347 |
| ACA1xRDS1    | 126 | 165 | 172 | 167 | 121 | 274 | 196 |
| ACA1xRGM1    | 601 | 726 | 683 | 663 | 744 | 826 | 709 |
| ACA1xRPH1    | 183 | 226 | 151 | 183 | 185 | 338 | 207 |
| ACA1xRPN4    | 103 | 187 | 131 | 115 | 118 | 153 | 123 |
| ACA1xRSC3    | 178 | 679 | 481 | 138 | 323 | 352 | 385 |
| ACA1xRTG3    | 166 | 484 | 419 | 187 | 280 | 280 | 305 |
| ACA1xSKN7    | 182 | 581 | 443 | 194 | 404 | 319 | 298 |
| ACA1xSTP1    | 206 | 458 | 372 | 158 | 295 | 320 | 327 |
| ACA1xSTP3    | 288 | 422 | 452 | 309 | 409 | 323 | 289 |
| ACA1xSUT1    | 211 | 641 | 458 | 156 | 361 | 334 | 335 |
| ACA1xSWI6    | 162 | 448 | 373 | 171 | 268 | 229 | 280 |
| ACA1xUME6    | 85  | 46  | 86  | 78  | 86  | 133 | 121 |
| ACA1xYER184C | 246 | 556 | 478 | 166 | 466 | 434 | 439 |
| ACA1xYJL103C | 423 | 642 | 441 | 504 | 565 | 703 | 547 |
| ACA1xYLL054C | 28  | 29  | 20  | 30  | 36  | 82  | 44  |
| ACA1xYPL230W | 601 | 726 | 683 | 663 | 744 | 826 | 709 |
| ACA1xZMS1    | 227 | 633 | 483 | 233 | 397 | 381 | 467 |
| ACE2xCBF1    | 159 | 419 | 259 | 190 | 294 | 266 | 298 |
| ACE2xMET28   | 151 | 340 | 334 | 212 | 328 | 298 | 324 |
| ACE2xMET31   | 172 | 342 | 345 | 204 | 337 | 309 | 394 |
| ACE2xRSC30   | 39  | 21  | 25  | 19  | 26  | 47  | 31  |
| ACE2xRSC3    | 232 | 485 | 522 | 157 | 384 | 289 | 388 |
| ACE2xSKN7    | 174 | 443 | 537 | 226 | 400 | 322 | 432 |
| ACE2xSWI5    | 370 | 581 | 572 | 664 | 555 | 608 | 512 |
| ACE2xTYE7    | 165 | 399 | 221 | 168 | 262 | 260 | 262 |
| AFT1xAFT2    | 88  | 43  | 44  | 85  | 48  | 87  | 45  |
| AFT1xRCS1    | 61  | 40  | 40  | 58  | 36  | 75  | 48  |
| AFT2xCAT8    | 312 | 584 | 472 | 290 | 381 | 379 | 366 |
| AFT2xCBF1    | 304 | 574 | 235 | 350 | 259 | 532 | 291 |
| AFT2xFHL1    | 353 | 426 | 279 | 246 | 333 | 361 | 289 |
| AFT2xINO2    | 251 | 290 | 164 | 300 | 168 | 303 | 205 |
| AFT2xMET31   | 280 | 505 | 305 | 254 | 326 | 363 | 302 |
| AFT2xMIG1    | 396 | 626 | 435 | 466 | 392 | 645 | 349 |

|              |     |     |     |     |     |     |     |
|--------------|-----|-----|-----|-----|-----|-----|-----|
| AFT2xMIG3    | 327 | 349 | 293 | 307 | 360 | 417 | 359 |
| AFT2xPHD1    | 326 | 590 | 415 | 257 | 394 | 466 | 366 |
| AFT2xPHO4    | 283 | 385 | 149 | 289 | 170 | 404 | 201 |
| AFT2xRAP1    | 243 | 161 | 107 | 126 | 145 | 192 | 93  |
| AFT2xRCS1    | 383 | 694 | 478 | 371 | 352 | 535 | 342 |
| AFT2xRPH1    | 319 | 299 | 162 | 301 | 209 | 407 | 208 |
| AFT2xRPN4    | 161 | 199 | 111 | 188 | 94  | 204 | 111 |
| AFT2xRSC3    | 329 | 642 | 452 | 333 | 357 | 507 | 366 |
| AFT2xSFP1    | 296 | 516 | 367 | 242 | 332 | 320 | 318 |
| AFT2xSTB2    | 253 | 475 | 362 | 263 | 323 | 317 | 311 |
| AFT2xSTP1    | 292 | 555 | 321 | 319 | 335 | 395 | 333 |
| AFT2xSUT1    | 351 | 614 | 500 | 332 | 394 | 491 | 350 |
| AFT2xTYE7    | 278 | 520 | 193 | 302 | 236 | 426 | 232 |
| AFT2xYJL103C | 668 | 673 | 447 | 945 | 552 | 856 | 486 |
| AFT2xZMS1    | 388 | 830 | 500 | 412 | 489 | 537 | 424 |
| ARG80xBAS1   | 234 | 477 | 431 | 226 | 228 | 357 | 320 |
| ARG80xGCN4   | 265 | 363 | 349 | 174 | 214 | 263 | 305 |
| ARG80xMIG1   | 261 | 389 | 365 | 216 | 254 | 387 | 317 |
| ARG80xMIG3   | 211 | 209 | 232 | 124 | 254 | 235 | 298 |
| ARG80xSTB3   | 160 | 183 | 200 | 151 | 210 | 239 | 222 |
| ARG80xSUT1   | 208 | 345 | 382 | 138 | 235 | 262 | 332 |
| ARG80xSUT2   | 56  | 80  | 51  | 63  | 90  | 59  | 56  |
| ARG80xZMS1   | 241 | 419 | 382 | 197 | 297 | 307 | 401 |
| ARG81xBAS1   | 151 | 159 | 151 | 179 | 137 | 237 | 175 |
| ARG81xCAT8   | 155 | 165 | 113 | 138 | 156 | 237 | 161 |
| ARG81xGCN4   | 151 | 150 | 120 | 137 | 148 | 151 | 165 |
| ARG81xMIG1   | 178 | 185 | 123 | 233 | 136 | 305 | 137 |
| ARG81xMIG3   | 125 | 107 | 76  | 163 | 136 | 174 | 156 |
| ARG81xOPI1   | 40  | 32  | 22  | 58  | 28  | 36  | 32  |
| ARG81xPHO4   | 122 | 101 | 53  | 125 | 94  | 164 | 92  |
| ARG81xRDS1   | 90  | 43  | 40  | 102 | 90  | 185 | 68  |
| ARG81xRPH1   | 98  | 88  | 40  | 176 | 84  | 203 | 101 |
| ARG81xRSC30  | 36  | 8   | 11  | 20  | 20  | 52  | 15  |
| ARG81xRSC3   | 159 | 157 | 139 | 145 | 166 | 246 | 213 |
| ARG81xRTG3   | 119 | 138 | 125 | 158 | 140 | 173 | 191 |

|                  |     |     |     |     |     |     |     |    |
|------------------|-----|-----|-----|-----|-----|-----|-----|----|
| ARG81xSKN7       | 142 | 169 | 129 | 173 | 187 | 241 | 153 |    |
| ARG81xSTB4       | 105 | 48  | 46  | 103 | 63  | 111 | 68  |    |
| ARG81xSTP1       | 152 | 149 | 102 | 158 | 135 | 253 | 193 |    |
| ARG81xSTP2       | 39  | 20  | 24  | 63  | 29  | 69  | 49  |    |
| ARG81xSTP3       | 209 | 148 | 115 | 242 | 158 | 239 | 139 |    |
| ARG81xSUT1       | 153 | 147 | 123 | 145 | 153 | 260 | 151 |    |
| ARG81xUME6       | 69  | 12  | 24  | 81  | 37  | 95  | 47  |    |
| ARG81xYJL103C321 |     | 215 | 118 | 457 | 231 | 400 | 215 |    |
| ARO80xCST6       | 10  | 12  | 7   | 19  | 9   | 13  | 21  |    |
| ARO80xIME1       | 13  | 4   | 0   | 10  | 5   | 18  | 5   |    |
| ARO80xMIG1       | 22  | 22  | 16  | 29  | 19  | 35  | 31  |    |
| ARO80xPDR1       | 21  | 28  | 9   | 36  | 9   | 36  | 15  |    |
| ARO80xPDR3       | 15  | 3   | 0   | 14  | 7   | 4   | 4   |    |
| ARO80xPHD1       | 19  | 16  | 9   | 16  | 8   | 42  | 16  |    |
| ARO80xRDR1       | 21  | 14  | 5   | 11  | 5   | 19  | 17  |    |
| ARO80xRDS1       | 29  | 10  | 3   | 34  | 4   | 37  | 11  |    |
| ARO80xRSC3       | 23  | 13  | 14  | 21  | 12  | 36  | 12  |    |
| ARO80xSTB4       | 8   | 7   | 7   | 24  | 5   | 20  | 10  |    |
| ARO80xSTP1       | 30  | 25  | 13  | 22  | 12  | 39  | 22  |    |
| ARO80xSUT1       | 28  | 20  | 10  | 24  | 19  | 36  | 30  |    |
| ARO80xUME6       | 13  | 0   | 5   | 20  | 9   | 10  | 9   |    |
| ARO80xYER184C    |     | 24  | 26  | 8   | 15  | 9   | 43  | 31 |
| ARO80xYRM1       | 11  | 27  | 6   | 21  | 5   | 25  | 11  |    |
| ARR1xNHP6B       | 30  | 45  | 15  | 25  | 35  | 35  | 40  |    |
| ASG1xGIS1        | 1   | 7   | 0   | 5   | 11  | 12  | 3   |    |
| ASG1xPHD1        | 2   | 7   | 2   | 0   | 6   | 2   | 3   |    |
| ASG1xRGM1        | 1   | 7   | 0   | 5   | 11  | 12  | 3   |    |
| ASG1xSTB5        | 4   | 4   | 4   | 4   | 2   | 2   | 3   |    |
| ASG1xSTP1        | 2   | 4   | 2   | 0   | 8   | 8   | 3   |    |
| ASG1xSTP3        | 4   | 5   | 2   | 3   | 2   | 5   | 2   |    |
| ASG1xYPL230W1    |     | 7   | 0   | 5   | 11  | 12  | 3   |    |
| ASH1xCBF1        | 70  | 47  | 39  | 106 | 59  | 128 | 76  |    |
| ASH1xDAL82       | 75  | 102 | 73  | 90  | 82  | 113 | 90  |    |
| ASH1xMBP1        | 93  | 83  | 106 | 98  | 119 | 132 | 101 |    |
| ASH1xMCM1        | 60  | 15  | 20  | 58  | 72  | 50  | 33  |    |

|              |     |     |     |     |     |     |     |    |
|--------------|-----|-----|-----|-----|-----|-----|-----|----|
| ASH1xNDD1    | 48  | 17  | 18  | 58  | 72  | 54  | 29  |    |
| ASH1xNHP10   | 25  | 14  | 20  | 34  | 33  | 49  | 25  |    |
| ASH1xOPI1    | 19  | 10  | 18  | 24  | 26  | 31  | 18  |    |
| ASH1xRSC3    | 97  | 121 | 77  | 81  | 77  | 133 | 100 |    |
| ASH1xSTP1    | 67  | 68  | 46  | 77  | 84  | 109 | 70  |    |
| ASH1xSWI6    | 83  | 84  | 99  | 94  | 94  | 113 | 105 |    |
| ASH1xTYE7    | 75  | 41  | 38  | 94  | 53  | 81  | 63  |    |
| ASH1xYPR196W |     | 60  | 65  | 55  | 89  | 94  | 86  | 87 |
| AZF1xECM23   | 99  | 44  | 46  | 135 | 20  | 74  | 66  |    |
| AZF1xEDS1    | 44  | 37  | 17  | 59  | 10  | 40  | 23  |    |
| BAS1xGCN4    | 309 | 544 | 471 | 288 | 245 | 400 | 311 |    |
| BAS1xRTG3    | 206 | 497 | 482 | 255 | 254 | 419 | 308 |    |
| BAS1xSTP3    | 296 | 490 | 492 | 380 | 295 | 423 | 345 |    |
| CAD1xCBFI    | 140 | 65  | 63  | 102 | 63  | 115 | 102 |    |
| CAD1xUSV1    | 8   | 0   | 4   | 4   | 1   | 4   | 5   |    |
| CAD1xYAP7    | 138 | 26  | 38  | 154 | 78  | 68  | 72  |    |
| CAD1xYKL222C | 3   | 0   | 2   | 11  | 2   | 5   | 2   |    |
| CAT8xDAL82   | 182 | 421 | 427 | 175 | 265 | 277 | 327 |    |
| CAT8xGAL4    | 6   | 1   | 9   | 6   | 13  | 13  | 4   |    |
| CAT8xGIS1    | 667 | 653 | 609 | 634 | 658 | 830 | 760 |    |
| CAT8xHAC1    | 161 | 469 | 425 | 174 | 308 | 357 | 440 |    |
| CAT8xLYS14   | 203 | 366 | 322 | 140 | 244 | 263 | 312 |    |
| CAT8xMIG1    | 327 | 540 | 497 | 286 | 340 | 464 | 392 |    |
| CAT8xMIG3    | 245 | 313 | 314 | 200 | 299 | 323 | 420 |    |
| CAT8xMSN2    | 250 | 524 | 480 | 251 | 360 | 287 | 438 |    |
| CAT8xMSN4    | 386 | 438 | 442 | 355 | 360 | 469 | 438 |    |
| CAT8xNHP10   | 52  | 83  | 70  | 52  | 64  | 97  | 114 |    |
| CAT8xNRG1    | 254 | 316 | 357 | 151 | 310 | 286 | 375 |    |
| CAT8xOPI1    | 56  | 95  | 67  | 51  | 52  | 65  | 56  |    |
| CAT8xPDR1    | 246 | 487 | 451 | 208 | 327 | 358 | 312 |    |
| CAT8xPDR3    | 54  | 36  | 52  | 56  | 45  | 71  | 63  |    |
| CAT8xPHD1    | 213 | 525 | 419 | 169 | 368 | 362 | 385 |    |
| CAT8xRCS1    | 250 | 511 | 437 | 181 | 324 | 326 | 331 |    |
| CAT8xRDS1    | 136 | 135 | 133 | 142 | 207 | 321 | 185 |    |
| CAT8xRDS2    | 257 | 541 | 414 | 168 | 324 | 252 | 368 |    |

|              |     |     |     |     |     |     |     |
|--------------|-----|-----|-----|-----|-----|-----|-----|
| CAT8xREB1    | 149 | 189 | 261 | 127 | 272 | 220 | 248 |
| CAT8xRGM1    | 667 | 653 | 609 | 634 | 658 | 830 | 760 |
| CAT8xRPH1    | 206 | 232 | 172 | 161 | 158 | 344 | 256 |
| CAT8xRSC3    | 267 | 573 | 575 | 180 | 334 | 465 | 445 |
| CAT8xRTG3    | 144 | 389 | 398 | 166 | 250 | 229 | 310 |
| CAT8xSKN7    | 246 | 497 | 523 | 192 | 405 | 429 | 389 |
| CAT8xSTB1    | 143 | 438 | 387 | 167 | 248 | 247 | 333 |
| CAT8xSTB2    | 142 | 349 | 343 | 136 | 272 | 223 | 314 |
| CAT8xSTB4    | 152 | 198 | 165 | 141 | 186 | 173 | 158 |
| CAT8xSTB5    | 180 | 413 | 406 | 147 | 241 | 266 | 285 |
| CAT8xSTP1    | 239 | 523 | 387 | 216 | 271 | 468 | 360 |
| CAT8xSTP2    | 61  | 96  | 88  | 66  | 47  | 155 | 111 |
| CAT8xSUT1    | 256 | 576 | 559 | 204 | 380 | 419 | 381 |
| CAT8xSWI5    | 353 | 581 | 470 | 455 | 431 | 593 | 469 |
| CAT8xUGA3    | 93  | 101 | 73  | 93  | 93  | 175 | 86  |
| CAT8xUME6    | 135 | 55  | 92  | 142 | 88  | 158 | 118 |
| CAT8xYBL054W | 235 | 484 | 437 | 160 | 352 | 359 | 397 |
| CAT8xYDR026C | 155 | 177 | 182 | 139 | 198 | 226 | 166 |
| CAT8xYDR520C | 28  | 29  | 20  | 14  | 16  | 33  | 32  |
| CAT8xYER184C | 373 | 483 | 533 | 167 | 434 | 443 | 462 |
| CAT8xYJL103C | 589 | 593 | 456 | 523 | 505 | 661 | 546 |
| CAT8xYLL054C | 41  | 63  | 22  | 38  | 62  | 158 | 44  |
| CAT8xYPL230W | 667 | 653 | 609 | 634 | 658 | 830 | 760 |
| CAT8xYPR196W | 199 | 385 | 395 | 157 | 245 | 226 | 276 |
| CAT8xYRM1    | 188 | 384 | 353 | 169 | 275 | 349 | 354 |
| CAT8xZMS1    | 277 | 640 | 495 | 251 | 397 | 430 | 494 |
| CBF1xCRZ1    | 243 | 529 | 340 | 142 | 334 | 335 | 284 |
| CBF1xDAL81   | 28  | 2   | 7   | 20  | 5   | 17  | 8   |
| CBF1xDAL82   | 185 | 407 | 302 | 148 | 335 | 335 | 291 |
| CBF1xFHL1    | 156 | 353 | 145 | 154 | 245 | 294 | 247 |
| CBF1xGAT1    | 376 | 541 | 308 | 423 | 315 | 387 | 342 |
| CBF1xGCN4    | 238 | 406 | 266 | 180 | 237 | 300 | 281 |
| CBF1xHAC1    | 186 | 602 | 307 | 162 | 254 | 409 | 306 |
| CBF1xHAP1    | 82  | 91  | 41  | 110 | 46  | 112 | 64  |
| CBF1xHAP5    | 6   | 21  | 0   | 4   | 6   | 8   | 10  |

|                |     |     |      |     |      |     |      |     |
|----------------|-----|-----|------|-----|------|-----|------|-----|
| CBF1xHMS1      | 150 | 172 | 104  | 180 | 107  | 307 | 169  |     |
| CBF1xINO2      | 226 | 373 | 154  | 278 | 232  | 349 | 209  |     |
| CBF1xINO4      | 162 | 221 | 106  | 198 | 142  | 211 | 138  |     |
| CBF1xMATALPHA2 |     | 848 | 1337 | 676 | 1038 | 851 | 1098 | 931 |
| CBF1xMBP1      | 178 | 507 | 228  | 208 | 247  | 382 | 265  |     |
| CBF1xMET28     | 212 | 416 | 255  | 139 | 227  | 314 | 230  |     |
| CBF1xMET31     | 188 | 421 | 211  | 166 | 245  | 336 | 268  |     |
| CBF1xMET32     | 278 | 327 | 172  | 250 | 306  | 332 | 228  |     |
| CBF1xMET4      | 54  | 46  | 32   | 71  | 55   | 71  | 20   |     |
| CBF1xOAF1      | 86  | 198 | 54   | 118 | 135  | 134 | 112  |     |
| CBF1xPDR3      | 112 | 35  | 40   | 104 | 53   | 113 | 53   |     |
| CBF1xPDR8      | 159 | 368 | 185  | 149 | 248  | 332 | 252  |     |
| CBF1xPHD1      | 228 | 499 | 293  | 146 | 339  | 380 | 338  |     |
| CBF1xPHO4      | 311 | 539 | 205  | 338 | 223  | 518 | 263  |     |
| CBF1xRAP1      | 104 | 102 | 46   | 80  | 95   | 134 | 77   |     |
| CBF1xRDS2      | 184 | 554 | 234  | 178 | 232  | 272 | 306  |     |
| CBF1xREB1      | 242 | 230 | 257  | 270 | 275  | 354 | 269  |     |
| CBF1xRPH1      | 222 | 189 | 91   | 232 | 141  | 309 | 236  |     |
| CBF1xRSC3      | 156 | 503 | 365  | 192 | 386  | 511 | 394  |     |
| CBF1xRTG3      | 180 | 397 | 308  | 202 | 271  | 400 | 264  |     |
| CBF1xSFP1      | 188 | 473 | 198  | 210 | 226  | 302 | 249  |     |
| CBF1xSTB2      | 246 | 369 | 306  | 266 | 245  | 312 | 308  |     |
| CBF1xSTB4      | 134 | 229 | 101  | 176 | 132  | 185 | 138  |     |
| CBF1xSTP1      | 234 | 506 | 209  | 180 | 318  | 386 | 304  |     |
| CBF1xSUT1      | 242 | 443 | 303  | 214 | 386  | 458 | 338  |     |
| CBF1xTBF1      | 185 | 329 | 234  | 154 | 224  | 313 | 224  |     |
| CBF1xTYE7      | 439 | 801 | 368  | 414 | 290  | 699 | 303  |     |
| CBF1xYDR026C   | 172 | 193 | 135  | 194 | 203  | 322 | 194  |     |
| CBF1xYDR520C   | 24  | 40  | 8    | 28  | 10   | 20  | 24   |     |
| CBF1xYER184C   | 253 | 435 | 293  | 183 | 368  | 499 | 460  |     |
| CBF1xYJL103C   | 443 | 640 | 247  | 543 | 422  | 769 | 535  |     |
| CBF1xYLL054C   | 20  | 31  | 6    | 56  | 68   | 122 | 27   |     |
| CBF1xYOX1      | 54  | 34  | 45   | 49  | 41   | 37  | 40   |     |
| CBF1xYRM1      | 194 | 469 | 233  | 250 | 257  | 409 | 291  |     |
| CEP3xMIG3      | 179 | 287 | 277  | 170 | 288  | 223 | 375  |     |



|               |     |     |     |     |     |     |     |   |
|---------------|-----|-----|-----|-----|-----|-----|-----|---|
| CEP3xRDS1     | 101 | 129 | 123 | 118 | 104 | 203 | 163 |   |
| CEP3xSTB3     | 143 | 173 | 201 | 132 | 182 | 225 | 195 |   |
| CEP3xSTB4     | 134 | 174 | 180 | 153 | 155 | 140 | 158 |   |
| CEP3xYNR063W  |     | 1   | 4   | 7   | 4   | 4   | 5   | 9 |
| CHA4xGIS1     | 0   | 4   | 0   | 0   | 10  | 10  | 2   |   |
| CHA4xRGM1     | 0   | 4   | 0   | 0   | 10  | 10  | 2   |   |
| CHA4xYPL230W0 |     | 4   | 0   | 0   | 10  | 10  | 2   |   |
| CIN5xHMRA2    | 229 | 174 | 226 | 198 | 377 | 301 | 234 |   |
| CIN5xMET4     | 23  | 11  | 9   | 26  | 33  | 13  | 18  |   |
| CIN5xMIG3     | 202 | 79  | 130 | 158 | 300 | 155 | 184 |   |
| CIN5xNHP6A    | 152 | 125 | 203 | 155 | 242 | 142 | 148 |   |
| CIN5xNRG1     | 207 | 107 | 137 | 150 | 260 | 169 | 180 |   |
| CIN5xPDR3     | 65  | 5   | 19  | 34  | 71  | 36  | 17  |   |
| CIN5xPDR8     | 215 | 111 | 147 | 152 | 271 | 179 | 172 |   |
| CIN5xREB1     | 133 | 82  | 97  | 131 | 310 | 112 | 109 |   |
| CIN5xRGT1     | 230 | 138 | 196 | 166 | 249 | 153 | 194 |   |
| CIN5xSTB2     | 146 | 121 | 149 | 144 | 284 | 121 | 149 |   |
| CIN5xBP1      | 207 | 162 | 213 | 242 | 463 | 197 | 187 |   |
| CIN5xYDR026C  | 86  | 65  | 59  | 84  | 187 | 80  | 54  |   |
| CIN5xYPR196W  | 199 | 135 | 194 | 130 | 233 | 152 | 170 |   |
| CRZ1xGIS1     | 703 | 695 | 702 | 666 | 688 | 903 | 795 |   |
| CRZ1xINO2     | 192 | 273 | 223 | 159 | 202 | 219 | 206 |   |
| CRZ1xMSN2     | 266 | 559 | 551 | 241 | 364 | 307 | 464 |   |
| CRZ1xPDR1     | 223 | 439 | 495 | 165 | 286 | 276 | 369 |   |
| CRZ1xPDR3     | 77  | 23  | 55  | 54  | 66  | 63  | 68  |   |
| CRZ1xRDS1     | 152 | 126 | 122 | 143 | 132 | 263 | 221 |   |
| CRZ1xRGM1     | 703 | 695 | 702 | 666 | 688 | 903 | 795 |   |
| CRZ1xSTP1     | 251 | 422 | 412 | 198 | 258 | 375 | 334 |   |
| CRZ1xSUT1     | 275 | 462 | 558 | 191 | 306 | 375 | 397 |   |
| CRZ1xSWI5     | 440 | 537 | 555 | 475 | 441 | 603 | 537 |   |
| CRZ1xTYE7     | 241 | 471 | 269 | 140 | 265 | 261 | 252 |   |
| CRZ1xYJL103C  | 499 | 611 | 501 | 547 | 415 | 643 | 576 |   |
| CRZ1xYPL230W  | 703 | 695 | 702 | 666 | 688 | 903 | 795 |   |
| CST6xNDD1     | 41  | 33  | 38  | 56  | 121 | 81  | 67  |   |
| CST6xSUT1     | 178 | 156 | 218 | 140 | 203 | 249 | 271 |   |

|              |     |     |     |     |     |     |     |
|--------------|-----|-----|-----|-----|-----|-----|-----|
| CST6xSWI6    | 211 | 173 | 210 | 138 | 172 | 226 | 276 |
| CST6xYER184C | 216 | 154 | 215 | 200 | 249 | 328 | 319 |
| CST6xYJL103C | 376 | 230 | 204 | 531 | 335 | 529 | 413 |
| CST6xYLL054C | 14  | 13  | 9   | 21  | 26  | 55  | 24  |
| CUP9xECM23   | 191 | 83  | 78  | 163 | 162 | 193 | 84  |
| CUP9xGAT3    | 29  | 33  | 34  | 35  | 31  | 64  | 31  |
| CUP9xRAP1    | 24  | 15  | 12  | 7   | 17  | 16  | 4   |
| CUP9xRSC30   | 10  | 0   | 6   | 12  | 14  | 20  | 3   |
| CUP9xRSC3    | 56  | 47  | 45  | 44  | 87  | 59  | 46  |
| CUP9xSFP1    | 36  | 43  | 40  | 26  | 30  | 34  | 25  |
| CUP9xSTP1    | 40  | 43  | 23  | 32  | 35  | 52  | 32  |
| DAL80xGAT1   | 511 | 499 | 638 | 686 | 701 | 632 | 457 |
| DAL80xGLN3   | 311 | 430 | 541 | 413 | 457 | 555 | 443 |
| DAL80xGZF3   | 514 | 287 | 466 | 691 | 702 | 635 | 459 |
| DAL80xHAP1   | 72  | 89  | 64  | 84  | 83  | 81  | 61  |
| DAL80xBBP1   | 245 | 426 | 386 | 312 | 435 | 387 | 314 |
| DAL82xEDS1   | 415 | 504 | 401 | 456 | 294 | 433 | 471 |
| DAL82xHAP3   | 7   | 3   | 13  | 5   | 15  | 15  | 16  |
| DAL82xIME1   | 60  | 43  | 55  | 59  | 48  | 95  | 63  |
| DAL82xLYS14  | 218 | 377 | 389 | 148 | 234 | 286 | 282 |
| DAL82xMBP1   | 186 | 518 | 397 | 192 | 256 | 253 | 349 |
| DAL82xMCM1   | 119 | 76  | 82  | 99  | 122 | 103 | 74  |
| DAL82xOPI1   | 55  | 77  | 46  | 51  | 60  | 69  | 51  |
| DAL82xPDR1   | 187 | 409 | 378 | 165 | 293 | 247 | 289 |
| DAL82xPHD1   | 202 | 505 | 442 | 161 | 255 | 292 | 347 |
| DAL82xRDS1   | 111 | 122 | 93  | 130 | 147 | 259 | 178 |
| DAL82xREB1   | 153 | 192 | 232 | 142 | 209 | 212 | 248 |
| DAL82xRSC3   | 160 | 543 | 370 | 163 | 333 | 278 | 373 |
| DAL82xSTB1   | 195 | 445 | 355 | 133 | 249 | 221 | 355 |
| DAL82xSTB2   | 147 | 338 | 333 | 138 | 224 | 187 | 298 |
| DAL82xSTB3   | 172 | 141 | 175 | 132 | 209 | 179 | 203 |
| DAL82xSTP1   | 202 | 472 | 357 | 185 | 239 | 282 | 333 |
| DAL82xSUT1   | 195 | 499 | 420 | 174 | 311 | 322 | 332 |
| DAL82xSWI4   | 235 | 443 | 361 | 128 | 230 | 258 | 310 |
| DAL82xTYE7   | 161 | 359 | 248 | 133 | 253 | 259 | 238 |

|               |      |      |      |      |      |      |      |     |
|---------------|------|------|------|------|------|------|------|-----|
| DAL82xUME6    | 89   | 40   | 94   | 101  | 62   | 122  | 88   |     |
| DAL82xYER184C |      | 271  | 436  | 452  | 157  | 328  | 397  | 424 |
| DIG1xSTE12    | 59   | 67   | 82   | 72   | 50   | 77   | 51   |     |
| ECM23xGAT4    | 1065 | 1112 | 1124 | 1069 | 1576 | 1206 | 1178 |     |
| ECM23xGCR1    | 587  | 327  | 269  | 669  | 513  | 561  | 402  |     |
| ECM23xMET32   | 1007 | 784  | 564  | 1044 | 1237 | 1036 | 903  |     |
| ECM23xMET4    | 182  | 76   | 53   | 170  | 159  | 155  | 88   |     |
| EDS1xGAL80    | 26   | 17   | 5    | 25   | 12   | 46   | 19   |     |
| EDS1xHSF1     | 110  | 41   | 51   | 111  | 56   | 82   | 84   |     |
| EDS1xMBP1     | 437  | 468  | 397  | 479  | 297  | 480  | 505  |     |
| EDS1xPBF1     | 194  | 96   | 79   | 197  | 73   | 167  | 108  |     |
| EDS1xPBF2     | 432  | 463  | 263  | 451  | 260  | 500  | 373  |     |
| EDS1xRDR1     | 489  | 246  | 219  | 596  | 229  | 460  | 446  |     |
| EDS1xRGT1     | 604  | 586  | 453  | 611  | 370  | 552  | 568  |     |
| EDS1xSTB3     | 484  | 206  | 217  | 497  | 273  | 452  | 372  |     |
| EDS1xSTP1     | 492  | 462  | 321  | 517  | 258  | 475  | 497  |     |
| EDS1xYRM1     | 486  | 521  | 380  | 544  | 337  | 696  | 612  |     |
| FHL1xINO4     | 106  | 108  | 89   | 129  | 129  | 117  | 125  |     |
| FHL1xMET31    | 184  | 285  | 218  | 137  | 255  | 234  | 282  |     |
| FHL1xMIG1     | 241  | 373  | 280  | 247  | 304  | 433  | 299  |     |
| FHL1xMIG3     | 192  | 202  | 186  | 134  | 288  | 253  | 315  |     |
| FHL1xOPI1     | 59   | 79   | 35   | 63   | 62   | 49   | 53   |     |
| FHL1xPHO4     | 197  | 223  | 99   | 138  | 132  | 209  | 186  |     |
| FHL1xRAP1     | 239  | 140  | 84   | 119  | 160  | 124  | 104  |     |
| FHL1xRCS1     | 208  | 379  | 279  | 156  | 274  | 300  | 279  |     |
| FHL1xRPH1     | 197  | 152  | 109  | 172  | 165  | 280  | 209  |     |
| FHL1xRSC3     | 258  | 553  | 241  | 169  | 312  | 298  | 358  |     |
| FHL1xSFP1     | 297  | 374  | 277  | 200  | 288  | 269  | 275  |     |
| FHL1xSTP2     | 60   | 66   | 41   | 74   | 38   | 84   | 57   |     |
| FHL1xTYE7     | 165  | 326  | 113  | 128  | 206  | 239  | 225  |     |
| FHL1xYJL103C  | 473  | 456  | 302  | 524  | 438  | 620  | 432  |     |
| FKH1xFKH2     | 327  | 487  | 433  | 200  | 449  | 372  | 322  |     |
| FKH1xHCM1     | 754  | 558  | 645  | 763  | 899  | 733  | 632  |     |
| FKH1xMBP1     | 201  | 413  | 379  | 217  | 328  | 286  | 348  |     |
| FKH1xMCM1     | 100  | 49   | 60   | 81   | 147  | 113  | 91   |     |

|               |      |     |     |      |      |     |     |    |
|---------------|------|-----|-----|------|------|-----|-----|----|
| FKH1xNDD1     | 78   | 53  | 72  | 62   | 147  | 109 | 69  |    |
| FKH1xSTB1     | 197  | 398 | 379 | 192  | 340  | 245 | 343 |    |
| FKH1xSWI4     | 293  | 403 | 390 | 181  | 319  | 310 | 324 |    |
| FKH1xSWI6     | 204  | 369 | 372 | 189  | 290  | 274 | 302 |    |
| FKH2xHCM1     | 1055 | 676 | 727 | 650  | 1115 | 867 | 628 |    |
| FKH2xMBP1     | 289  | 463 | 427 | 155  | 402  | 332 | 319 |    |
| FKH2xMCM1     | 140  | 69  | 73  | 72   | 176  | 127 | 85  |    |
| FKH2xNDD1     | 126  | 57  | 83  | 63   | 178  | 126 | 67  |    |
| FKH2xSTB1     | 296  | 467 | 444 | 157  | 428  | 295 | 315 |    |
| FKH2xSWI4     | 418  | 469 | 452 | 174  | 398  | 367 | 297 |    |
| FKH2xSWI6     | 295  | 428 | 456 | 168  | 376  | 332 | 280 |    |
| FZF1xSPT23    | 470  | 377 | 366 | 360  | 348  | 298 | 427 |    |
| GAL4xGAL80    | 10   | 0   | 8   | 11   | 4    | 15  | 0   |    |
| GAL4xGIS1     | 16   | 10  | 12  | 17   | 17   | 48  | 3   |    |
| GAL4xMSN4     | 15   | 7   | 13  | 13   | 9    | 30  | 1   |    |
| GAL4xPDR1     | 7    | 3   | 6   | 2    | 12   | 15  | 4   |    |
| GAL4xRGM1     | 16   | 10  | 12  | 17   | 17   | 48  | 3   |    |
| GAL4xRSC3     | 4    | 1   | 14  | 6    | 8    | 17  | 5   |    |
| GAL4xSTP1     | 9    | 2   | 18  | 6    | 10   | 15  | 5   |    |
| GAL4xSUT1     | 4    | 2   | 15  | 1    | 11   | 16  | 6   |    |
| GAL4xYJL103C  | 13   | 5   | 0   | 7    | 15   | 32  | 4   |    |
| GAL4xYPL230W  | 16   | 10  | 12  | 17   | 17   | 48  | 3   |    |
| GAL80xGIS1    | 33   | 29  | 10  | 34   | 34   | 119 | 26  |    |
| GAL80xIME1    | 7    | 2   | 6   | 7    | 6    | 7   | 0   |    |
| GAL80xMIG3    | 46   | 13  | 10  | 17   | 30   | 58  | 15  |    |
| GAL80xPDR1    | 17   | 14  | 11  | 12   | 25   | 49  | 9   |    |
| GAL80xRSC3    | 5    | 19  | 22  | 13   | 15   | 57  | 8   |    |
| GAL80xSKN7    | 50   | 8   | 18  | 9    | 31   | 49  | 12  |    |
| GAL80xSTP1    | 16   | 19  | 28  | 20   | 18   | 51  | 18  |    |
| GAL80xSUT1    | 38   | 19  | 26  | 13   | 24   | 64  | 18  |    |
| GAL80xYER184C |      | 34  | 12  | 2    | 4    | 24  | 41  | 14 |
| GAL80xYJL103C | 44   | 17  | 1   | 29   | 31   | 81  | 11  |    |
| GAL80xYPL230W |      | 33  | 29  | 10   | 34   | 34  | 119 | 26 |
| GAT1xGLN3     | 562  | 574 | 659 | 656  | 496  | 582 | 461 |    |
| GAT1xGZF3     | 920  | 378 | 570 | 1064 | 763  | 657 | 471 |    |

|                 |      |     |     |      |     |      |     |
|-----------------|------|-----|-----|------|-----|------|-----|
| GAT1xSIP4       | 22   | 3   | 22  | 29   | 9   | 10   | 11  |
| GAT3xMCM1       | 62   | 60  | 75  | 91   | 89  | 144  | 80  |
| GAT3xRLM1       | 198  | 124 | 196 | 174  | 194 | 357  | 263 |
| GAT3xRSC30      | 44   | 24  | 10  | 19   | 15  | 69   | 23  |
| GAT4xGCR1       | 139  | 110 | 89  | 89   | 113 | 128  | 120 |
| GAT4xLYS14      | 276  | 343 | 347 | 138  | 296 | 256  | 327 |
| GAT4xMET32      | 164  | 279 | 200 | 146  | 247 | 197  | 237 |
| GAT4xMOT3       | 191  | 634 | 727 | 158  | 619 | 224  | 830 |
| GCN4xLEU3       | 37   | 37  | 41  | 37   | 55  | 44   | 33  |
| GCN4xRSC3       | 176  | 367 | 425 | 186  | 236 | 242  | 323 |
| GCN4xRTG3       | 216  | 367 | 395 | 200  | 245 | 285  | 322 |
| GCN4xSTB3       | 210  | 187 | 203 | 157  | 255 | 249  | 202 |
| GCN4xTBF1       | 217  | 411 | 329 | 181  | 242 | 262  | 244 |
| GCN4xTYE7       | 248  | 403 | 224 | 180  | 194 | 248  | 208 |
| GCR1xGCR2       | 273  | 228 | 130 | 196  | 271 | 155  | 227 |
| GCR1xLYS14      | 217  | 93  | 81  | 82   | 93  | 137  | 98  |
| GCR1xRAP1       | 72   | 22  | 18  | 48   | 69  | 72   | 32  |
| GCR1xSTB4       | 107  | 36  | 39  | 100  | 56  | 76   | 53  |
| GCR1xSTP2       | 35   | 10  | 18  | 47   | 13  | 53   | 27  |
| GCR2xRDR1       | 273  | 362 | 316 | 344  | 514 | 290  | 567 |
| GCR2xRFX1       | 2    | 0   | 11  | 5    | 1   | 4    | 7   |
| GCR2xSNF1       | 3    | 2   | 1   | 0    | 14  | 1    | 2   |
| GCR2xSTB4       | 263  | 289 | 244 | 276  | 407 | 205  | 329 |
| GCR2xTHI2       | 8    | 2   | 5   | 14   | 6   | 8    | 22  |
| GCR2xYBL054W480 |      | 876 | 632 | 230  | 941 | 373  | 762 |
| GIS1xMIG1       | 942  | 820 | 743 | 1148 | 820 | 1390 | 836 |
| GIS1xMIG2       | 49   | 10  | 15  | 69   | 23  | 54   | 44  |
| GIS1xMIG3       | 831  | 484 | 486 | 859  | 766 | 1030 | 909 |
| GIS1xMSN2       | 937  | 917 | 929 | 1219 | 906 | 1146 | 993 |
| GIS1xMSN4       | 1367 | 745 | 788 | 1854 | 906 | 1773 | 993 |
| GIS1xNHP10      | 238  | 153 | 86  | 248  | 153 | 311  | 225 |
| GIS1xNRG1       | 722  | 469 | 509 | 667  | 723 | 790  | 717 |
| GIS1xOAF1       | 337  | 200 | 164 | 439  | 308 | 379  | 256 |
| GIS1xOPI1       | 124  | 115 | 74  | 193  | 144 | 149  | 127 |
| GIS1xPDR1       | 677  | 703 | 605 | 647  | 691 | 903  | 658 |

|              |      |      |     |      |      |      |      |
|--------------|------|------|-----|------|------|------|------|
| GIS1xPHD1    | 646  | 745  | 623 | 636  | 695  | 1003 | 740  |
| GIS1xRDS1    | 451  | 184  | 209 | 580  | 326  | 753  | 337  |
| GIS1xRDS2    | 831  | 742  | 557 | 699  | 728  | 720  | 752  |
| GIS1xREB1    | 528  | 355  | 384 | 651  | 634  | 719  | 597  |
| GIS1xRPH1    | 626  | 389  | 292 | 770  | 390  | 969  | 536  |
| GIS1xRSC3    | 717  | 879  | 764 | 740  | 764  | 946  | 747  |
| GIS1xSKN7    | 648  | 756  | 675 | 763  | 817  | 1081 | 762  |
| GIS1xSOK2    | 1188 | 729  | 752 | 671  | 670  | 1479 | 958  |
| GIS1xSTP1    | 660  | 632  | 530 | 758  | 569  | 951  | 694  |
| GIS1xSUT1    | 830  | 824  | 790 | 840  | 818  | 1182 | 820  |
| GIS1xTBF1    | 538  | 541  | 557 | 610  | 629  | 645  | 623  |
| GIS1xUGA3    | 266  | 124  | 118 | 374  | 187  | 458  | 175  |
| GIS1xUME6    | 280  | 61   | 115 | 325  | 178  | 409  | 274  |
| GIS1xYDR026C | 469  | 290  | 216 | 561  | 440  | 617  | 376  |
| GIS1xYER130C | 214  | 74   | 74  | 242  | 129  | 264  | 154  |
| GIS1xYER184C | 926  | 688  | 729 | 792  | 857  | 1233 | 907  |
| GIS1xYJL103C | 1519 | 857  | 680 | 2136 | 1090 | 1963 | 1070 |
| GIS1xYLL054C | 80   | 55   | 39  | 113  | 71   | 232  | 72   |
| GIS1xZMS1    | 916  | 1050 | 903 | 1124 | 930  | 1425 | 1158 |
| GLN3xGZF3    | 567  | 328  | 491 | 657  | 496  | 582  | 461  |
| GSM1xMIG1    | 64   | 62   | 50  | 65   | 56   | 77   | 39   |
| GSM1xMIG3    | 57   | 32   | 35  | 41   | 51   | 67   | 42   |
| GSM1xRDS1    | 23   | 19   | 7   | 35   | 22   | 51   | 20   |
| GSM1xREB1    | 35   | 22   | 22  | 60   | 45   | 34   | 32   |
| GSM1xSUT1    | 49   | 44   | 55  | 36   | 48   | 72   | 45   |
| GSM1xYJL103C | 125  | 64   | 45  | 161  | 94   | 133  | 86   |
| GTS1xMET32   | 424  | 342  | 219 | 426  | 425  | 394  | 281  |
| GTS1xMET4    | 67   | 26   | 27  | 63   | 57   | 47   | 40   |
| HAC1xMBP1    | 195  | 466  | 445 | 212  | 302  | 358  | 390  |
| HAC1xMIG1    | 244  | 532  | 382 | 239  | 314  | 504  | 380  |
| HAC1xPHD1    | 191  | 502  | 481 | 184  | 277  | 369  | 382  |
| HAC1xPHO4    | 170  | 366  | 177 | 163  | 137  | 346  | 240  |
| HAC1xSUT1    | 202  | 494  | 423 | 159  | 273  | 396  | 402  |
| HAC1xSWI6    | 193  | 424  | 418 | 199  | 270  | 323  | 337  |
| HAC1xTYE7    | 193  | 535  | 249 | 152  | 206  | 314  | 262  |

|               |     |     |     |     |     |     |     |
|---------------|-----|-----|-----|-----|-----|-----|-----|
| HAC1xYLL054C  | 16  | 32  | 15  | 17  | 36  | 99  | 43  |
| HAP1xMIG1     | 97  | 73  | 72  | 135 | 50  | 168 | 75  |
| HAP1xMIG3     | 61  | 45  | 49  | 66  | 53  | 117 | 85  |
| HAP1xNHP10    | 23  | 4   | 12  | 35  | 10  | 40  | 27  |
| HAP1xPDR1     | 67  | 82  | 54  | 90  | 41  | 95  | 71  |
| HAP1xPDR3     | 21  | 2   | 9   | 22  | 11  | 34  | 16  |
| HAP1xPHO4     | 70  | 74  | 38  | 90  | 20  | 107 | 45  |
| HAP1xRDS1     | 41  | 15  | 23  | 86  | 16  | 108 | 53  |
| HAP1xREB1     | 63  | 42  | 45  | 73  | 41  | 81  | 81  |
| HAP1xRSC3     | 70  | 105 | 58  | 82  | 62  | 142 | 92  |
| HAP1xSFP1     | 48  | 78  | 74  | 81  | 34  | 73  | 56  |
| HAP1xSKN7     | 56  | 85  | 91  | 96  | 57  | 141 | 91  |
| HAP1xSOK2     | 148 | 83  | 84  | 79  | 31  | 169 | 107 |
| HAP1xSUT1     | 61  | 98  | 79  | 66  | 44  | 150 | 92  |
| HAP1xTOS8     | 4   | 2   | 1   | 6   | 3   | 3   | 2   |
| HAP1xUGA3     | 33  | 18  | 17  | 52  | 6   | 68  | 29  |
| HAP1xYER184C  | 82  | 100 | 82  | 75  | 70  | 135 | 130 |
| HAP1xYJL103C  | 140 | 137 | 84  | 210 | 80  | 203 | 151 |
| HAP1xZMS1     | 74  | 86  | 94  | 102 | 61  | 156 | 112 |
| HAP2xRDS1     | 110 | 98  | 148 | 146 | 85  | 211 | 141 |
| HAP2xRSC3     | 190 | 312 | 412 | 143 | 322 | 205 | 335 |
| HAP2xSUT1     | 213 | 297 | 413 | 168 | 284 | 254 | 319 |
| HAP2xYLL054C  | 20  | 23  | 20  | 29  | 17  | 42  | 32  |
| HAP3xHAP4     | 12  | 5   | 3   | 12  | 3   | 6   | 8   |
| HAP3xMBP1     | 2   | 9   | 6   | 4   | 9   | 4   | 9   |
| HAP3xMIG3     | 9   | 1   | 8   | 7   | 12  | 19  | 10  |
| HAP3xPDR8     | 9   | 1   | 5   | 6   | 9   | 10  | 8   |
| HAP3xRDS1     | 4   | 6   | 4   | 5   | 2   | 19  | 3   |
| HAP3xRSC3     | 15  | 18  | 12  | 12  | 31  | 15  | 13  |
| HAP3xSKN7     | 8   | 7   | 10  | 8   | 22  | 24  | 10  |
| HAP3xSUT1     | 14  | 3   | 16  | 8   | 16  | 26  | 9   |
| HAP3xSWI6     | 4   | 7   | 9   | 1   | 12  | 6   | 8   |
| HAP3xUGA3     | 2   | 0   | 4   | 5   | 6   | 5   | 5   |
| HAP3xYAP3     | 7   | 0   | 1   | 5   | 12  | 8   | 4   |
| HAP3xYBL054W9 |     | 8   | 7   | 4   | 10  | 17  | 10  |

|                 |      |      |      |      |      |      |      |  |
|-----------------|------|------|------|------|------|------|------|--|
| HAP3xZMS1       | 10   | 3    | 9    | 9    | 13   | 29   | 12   |  |
| HAP4xHAP5       | 14   | 0    | 3    | 16   | 5    | 19   | 9    |  |
| HAP4xRDS1       | 73   | 36   | 40   | 97   | 49   | 110  | 56   |  |
| HAP4xRSC3       | 115  | 127  | 179  | 139  | 186  | 136  | 125  |  |
| HAP4xSKN7       | 125  | 129  | 149  | 128  | 149  | 162  | 120  |  |
| HAP4xSUT1       | 149  | 127  | 167  | 116  | 151  | 137  | 123  |  |
| HAP4xYLL054C    | 19   | 12   | 8    | 20   | 8    | 27   | 7    |  |
| HAP5xNHP10      | 5    | 0    | 3    | 6    | 2    | 5    | 4    |  |
| HAP5xPHD1       | 11   | 13   | 11   | 13   | 12   | 18   | 10   |  |
| HAP5xRDS1       | 15   | 4    | 9    | 18   | 0    | 24   | 10   |  |
| HAP5xRSC3       | 17   | 9    | 14   | 17   | 18   | 14   | 15   |  |
| HAP5xSKN7       | 22   | 10   | 17   | 24   | 9    | 34   | 13   |  |
| HAP5xSTP2       | 3    | 1    | 5    | 5    | 2    | 5    | 5    |  |
| HAP5xSUT1       | 19   | 11   | 24   | 19   | 9    | 25   | 12   |  |
| HAP5xUGA3       | 4    | 0    | 5    | 4    | 5    | 8    | 6    |  |
| HAP5xYAP3       | 8    | 2    | 2    | 13   | 10   | 15   | 5    |  |
| HAP5xYBL054W6   |      | 19   | 7    | 7    | 14   | 17   | 7    |  |
| HAP5xYDR026C    | 12   | 5    | 1    | 12   | 8    | 14   | 6    |  |
| HCM1xMCM1       | 301  | 80   | 111  | 263  | 318  | 235  | 159  |  |
| HCM1xNDD1       | 270  | 67   | 130  | 237  | 314  | 224  | 122  |  |
| HMRA2xMATALPHA2 | 1274 | 1385 | 1148 | 1330 | 1641 | 1628 | 1310 |  |
| HMRA2xMCM1      | 106  | 45   | 100  | 115  | 157  | 106  | 86   |  |
| HMRA2xNHP6A     | 192  | 418  | 402  | 214  | 393  | 331  | 381  |  |
| HMRA2xNHP6B     | 203  | 427  | 370  | 183  | 379  | 312  | 469  |  |
| HMRA2xSPT15     | 203  | 457  | 427  | 179  | 394  | 321  | 339  |  |
| HMS1xMIG1       | 212  | 231  | 165  | 266  | 244  | 411  | 225  |  |
| HMS1xMIG3       | 182  | 119  | 115  | 199  | 225  | 319  | 249  |  |
| HMS1xNHP10      | 52   | 37   | 33   | 54   | 54   | 83   | 67   |  |
| HMS1xRSC3       | 152  | 203  | 187  | 151  | 173  | 253  | 204  |  |
| HMS1xSOK2       | 318  | 179  | 179  | 191  | 159  | 425  | 242  |  |
| HMS1xSUT1       | 182  | 241  | 174  | 188  | 219  | 307  | 195  |  |
| HMS1xTYE7       | 144  | 161  | 78   | 148  | 97   | 252  | 148  |  |
| HMS1xYOX1       | 45   | 15   | 22   | 47   | 21   | 37   | 30   |  |
| HMS1xZMS1       | 194  | 296  | 214  | 246  | 252  | 419  | 286  |  |
| HSF1xBBP1       | 287  | 42   | 33   | 143  | 57   | 58   | 35   |  |



|                |     |     |     |     |      |     |     |     |
|----------------|-----|-----|-----|-----|------|-----|-----|-----|
| HSF1xYRR1      | 5   | 0   | 0   | 6   | 3    | 1   | 7   |     |
| IME1xMCM1      | 37  | 4   | 10  | 23  | 28   | 29  | 21  |     |
| IME1xNDD1      | 34  | 7   | 7   | 21  | 14   | 29  | 16  |     |
| IME1xPDR1      | 82  | 54  | 74  | 76  | 116  | 126 | 96  |     |
| IME1xPDR3      | 37  | 2   | 9   | 24  | 23   | 33  | 17  |     |
| IME1xRDS1      | 47  | 19  | 46  | 71  | 99   | 77  | 43  |     |
| IME1xRPN4      | 34  | 13  | 25  | 50  | 29   | 73  | 34  |     |
| IME1xRSC30     | 10  | 10  | 6   | 9   | 6    | 30  | 6   |     |
| IME1xRSC3      | 82  | 70  | 84  | 64  | 47   | 161 | 109 |     |
| IME1xSKN7      | 59  | 61  | 62  | 72  | 68   | 115 | 66  |     |
| IME1xSTB2      | 58  | 34  | 62  | 66  | 60   | 77  | 84  |     |
| IME1xSTP1      | 81  | 46  | 53  | 77  | 44   | 160 | 63  |     |
| IME1xSUT1      | 77  | 51  | 71  | 80  | 56   | 143 | 103 |     |
| IME1xUGA3      | 30  | 7   | 11  | 33  | 20   | 49  | 16  |     |
| IME1xUME6      | 37  | 2   | 9   | 57  | 6    | 65  | 43  |     |
| IME1xYLL054C   | 5   | 4   | 4   | 17  | 12   | 43  | 3   |     |
| IME1xYPR196W72 |     | 39  | 51  | 63  | 66   | 71  | 69  |     |
| INO2xINO4      | 126 | 105 | 59  | 153 | 106  | 148 | 111 |     |
| INO2xMATALPHA2 |     | 833 | 701 | 456 | 1052 | 535 | 776 | 692 |
| INO2xOAF1      | 72  | 101 | 38  | 102 | 77   | 95  | 70  |     |
| INO2xPDR3      | 44  | 14  | 22  | 52  | 25   | 55  | 24  |     |
| INO2xPHD1      | 181 | 255 | 168 | 115 | 202  | 247 | 221 |     |
| INO2xPHO4      | 166 | 221 | 89  | 186 | 139  | 234 | 162 |     |
| INO2xRAP1      | 104 | 46  | 45  | 66  | 69   | 73  | 51  |     |
| INO2xRCS1      | 191 | 265 | 185 | 160 | 142  | 229 | 175 |     |
| INO2xRDS1      | 141 | 61  | 50  | 153 | 100  | 173 | 127 |     |
| INO2xREB1      | 165 | 129 | 113 | 162 | 156  | 190 | 163 |     |
| INO2xSTB2      | 171 | 205 | 168 | 173 | 154  | 170 | 170 |     |
| INO2xSTB4      | 107 | 115 | 68  | 170 | 75   | 130 | 113 |     |
| INO2xTYE7      | 183 | 341 | 110 | 241 | 177  | 278 | 161 |     |
| INO2xYAP7      | 170 | 69  | 85  | 192 | 63   | 90  | 91  |     |
| INO2xYDR026C   | 136 | 118 | 81  | 158 | 134  | 160 | 109 |     |
| INO2xYLL054C   | 16  | 12  | 3   | 25  | 40   | 66  | 31  |     |
| INO4xPHO4      | 118 | 131 | 62  | 154 | 83   | 138 | 122 |     |
| INO4xRAP1      | 61  | 22  | 33  | 64  | 42   | 55  | 42  |     |

|                |     |     |     |     |     |     |     |
|----------------|-----|-----|-----|-----|-----|-----|-----|
| INO4xREB1      | 108 | 79  | 72  | 122 | 98  | 121 | 116 |
| INO4xSTB2      | 111 | 119 | 106 | 136 | 93  | 121 | 134 |
| INO4xTYE7      | 131 | 206 | 84  | 168 | 108 | 178 | 101 |
| INO4xBP1       | 137 | 166 | 138 | 197 | 115 | 152 | 167 |
| INO4xYAP7      | 127 | 48  | 70  | 147 | 45  | 72  | 82  |
| INO4xYDR026C   | 88  | 69  | 52  | 109 | 89  | 106 | 77  |
| INO4xYLL054C   | 7   | 10  | 2   | 17  | 22  | 52  | 25  |
| LEU3xMIG3      | 31  | 16  | 8   | 40  | 19  | 62  | 40  |
| LEU3xRSC3      | 17  | 47  | 23  | 24  | 22  | 128 | 47  |
| LEU3xSKN7      | 33  | 14  | 13  | 40  | 24  | 72  | 52  |
| LEU3xSTB1      | 19  | 28  | 12  | 26  | 7   | 61  | 40  |
| LEU3xSTP2      | 16  | 9   | 6   | 14  | 4   | 39  | 14  |
| LEU3xSUT1      | 39  | 28  | 18  | 44  | 18  | 75  | 41  |
| LEU3xSUT2      | 6   | 6   | 5   | 8   | 8   | 4   | 6   |
| LEU3xSWI4      | 31  | 25  | 13  | 18  | 7   | 64  | 33  |
| LEU3xTYE7      | 10  | 31  | 10  | 28  | 7   | 54  | 28  |
| LEU3xUME6      | 14  | 0   | 3   | 19  | 9   | 19  | 13  |
| LEU3xYJL103C   | 56  | 43  | 17  | 85  | 39  | 116 | 66  |
| LYS14xMCM1     | 82  | 48  | 65  | 81  | 131 | 116 | 66  |
| LYS14xMIG1     | 296 | 369 | 388 | 278 | 299 | 415 | 329 |
| LYS14xNHP10    | 73  | 55  | 50  | 51  | 69  | 91  | 85  |
| LYS14xNRG1     | 208 | 240 | 284 | 169 | 245 | 275 | 301 |
| LYS14xPDR3     | 62  | 42  | 42  | 54  | 58  | 75  | 70  |
| LYS14xPDR8     | 211 | 233 | 260 | 191 | 323 | 381 | 287 |
| LYS14xSKN7     | 214 | 351 | 341 | 144 | 297 | 311 | 274 |
| LYS14xSTB4     | 242 | 164 | 134 | 134 | 138 | 229 | 162 |
| LYS14xSTB5     | 328 | 326 | 356 | 144 | 262 | 266 | 277 |
| LYS14xSTE12    | 312 | 366 | 365 | 149 | 230 | 268 | 287 |
| LYS14xSUT1     | 219 | 379 | 386 | 154 | 272 | 281 | 298 |
| LYS14xSUT2     | 80  | 45  | 59  | 63  | 72  | 77  | 70  |
| LYS14xYJL103C  | 575 | 443 | 390 | 489 | 485 | 686 | 533 |
| LYS14xYLL054C  | 21  | 26  | 8   | 11  | 24  | 44  | 38  |
| LYS14xYRM1     | 215 | 343 | 370 | 206 | 311 | 412 | 351 |
| MATA1xRLM1     | 242 | 47  | 131 | 119 | 185 | 209 | 133 |
| MATALPHA2xMCM1 | 408 | 154 | 210 | 506 | 398 | 382 | 287 |

|                 |     |      |      |     |      |      |      |
|-----------------|-----|------|------|-----|------|------|------|
| MATALPHA2xNHP6A | 889 | 1126 | 995  | 939 | 936  | 997  | 1064 |
| MATALPHA2xNHP6B | 848 | 1105 | 1136 | 986 | 909  | 982  | 1287 |
| MATALPHA2xSPT15 | 952 | 1285 | 1033 | 956 | 844  | 1067 | 997  |
| MATALPHA2xSTE12 | 988 | 1281 | 1104 | 976 | 1041 | 1042 | 1119 |
| MATALPHA2xTYE7  | 826 | 1175 | 537  | 977 | 714  | 909  | 730  |
| MBP1xMCM1       | 161 | 75   | 84   | 124 | 211  | 151  | 106  |
| MBP1xMET28      | 175 | 366  | 290  | 162 | 224  | 214  | 314  |
| MBP1xNDD1       | 98  | 66   | 80   | 113 | 198  | 155  | 99   |
| MBP1xNDT80      | 13  | 15   | 12   | 12  | 7    | 14   | 15   |
| MBP1xPHD1       | 161 | 494  | 442  | 170 | 274  | 263  | 309  |
| MBP1xRDS1       | 103 | 105  | 107  | 121 | 95   | 232  | 159  |
| MBP1xRDS2       | 233 | 466  | 436  | 203 | 291  | 231  | 348  |
| MBP1xREB1       | 173 | 175  | 219  | 200 | 217  | 244  | 282  |
| MBP1xRSC3       | 172 | 609  | 464  | 207 | 275  | 323  | 495  |
| MBP1xRTG3       | 162 | 383  | 387  | 162 | 199  | 267  | 279  |
| MBP1xSTB1       | 266 | 594  | 440  | 221 | 402  | 367  | 489  |
| MBP1xSTB2       | 205 | 330  | 356  | 229 | 302  | 268  | 380  |
| MBP1xSTB3       | 159 | 174  | 161  | 164 | 206  | 167  | 157  |
| MBP1xSTP1       | 185 | 398  | 331  | 185 | 250  | 309  | 340  |
| MBP1xSTP2       | 56  | 60   | 52   | 78  | 38   | 130  | 109  |
| MBP1xSUM1       | 77  | 61   | 61   | 102 | 115  | 89   | 71   |
| MBP1xSUT1       | 221 | 475  | 526  | 171 | 276  | 347  | 402  |
| MBP1xSWI4       | 340 | 573  | 461  | 238 | 379  | 407  | 442  |
| MBP1xSWI6       | 327 | 545  | 576  | 331 | 500  | 416  | 459  |
| MBP1xTYE7       | 209 | 483  | 161  | 182 | 223  | 322  | 264  |
| MBP1xUME6       | 90  | 39   | 69   | 123 | 84   | 153  | 129  |
| MBP1xYDR026C    | 144 | 186  | 119  | 167 | 152  | 223  | 152  |
| MCM1xMSN2       | 129 | 73   | 81   | 125 | 209  | 111  | 78   |
| MCM1xNDD1       | 98  | 7    | 22   | 69  | 156  | 93   | 28   |
| MCM1xNHP10      | 29  | 10   | 22   | 36  | 34   | 29   | 15   |
| MCM1xPDR1       | 86  | 46   | 68   | 53  | 134  | 71   | 68   |
| MCM1xPHD1       | 102 | 46   | 99   | 96  | 129  | 118  | 77   |
| MCM1xRDS2       | 110 | 62   | 67   | 94  | 112  | 73   | 87   |
| MCM1xRSC3       | 98  | 60   | 77   | 71  | 151  | 113  | 82   |
| MCM1xSIP4       | 4   | 0    | 0    | 3   | 3    | 10   | 4    |

|               |     |     |     |     |     |     |     |    |
|---------------|-----|-----|-----|-----|-----|-----|-----|----|
| MCM1xSTB1     | 143 | 71  | 93  | 102 | 174 | 99  | 88  |    |
| MCM1xSTE12    | 90  | 63  | 96  | 78  | 128 | 97  | 102 |    |
| MCM1xSTP1     | 91  | 50  | 57  | 80  | 129 | 99  | 65  |    |
| MCM1xSTP2     | 28  | 1   | 5   | 40  | 29  | 24  | 20  |    |
| MCM1xSUT1     | 104 | 57  | 88  | 87  | 192 | 109 | 63  |    |
| MCM1xSWI4     | 171 | 70  | 100 | 109 | 166 | 108 | 76  |    |
| MCM1xSWI6     | 148 | 61  | 99  | 107 | 195 | 114 | 86  |    |
| MCM1xUGA3     | 66  | 18  | 18  | 40  | 39  | 70  | 15  |    |
| MCM1xUME6     | 29  | 6   | 6   | 26  | 47  | 35  | 21  |    |
| MCM1xXBP1     | 154 | 64  | 91  | 132 | 231 | 134 | 93  |    |
| MCM1xYLL054C  |     | 5   | 0   | 3   | 9   | 15  | 34  | 5  |
| MCM1xYOX1     | 33  | 10  | 19  | 24  | 35  | 14  | 8   |    |
| MCM1xYPR196W  |     | 85  | 45  | 56  | 75  | 142 | 79  | 66 |
| MET28xPHO4    | 152 | 265 | 123 | 141 | 116 | 240 | 167 |    |
| MET28xRSC3    | 179 | 396 | 334 | 148 | 281 | 247 | 345 |    |
| MET28xSTB1    | 197 | 360 | 262 | 144 | 205 | 230 | 344 |    |
| MET28xSTB5    | 250 | 290 | 312 | 142 | 219 | 202 | 317 |    |
| MET28xSUM1    | 67  | 74  | 75  | 68  | 98  | 105 | 93  |    |
| MET28xSUT1    | 176 | 386 | 330 | 169 | 257 | 299 | 304 |    |
| MET28xSWI4    | 256 | 356 | 253 | 170 | 186 | 256 | 313 |    |
| MET28xSWI6    | 184 | 322 | 288 | 183 | 214 | 244 | 315 |    |
| MET28xTYE7    | 186 | 386 | 225 | 134 | 165 | 262 | 216 |    |
| MET28xYNR063W |     | 4   | 0   | 2   | 6   | 6   | 4   | 4  |
| MET31xMIG1    | 254 | 459 | 336 | 274 | 341 | 468 | 351 |    |
| MET31xMIG3    | 219 | 262 | 225 | 165 | 326 | 320 | 404 |    |
| MET31xMSN4    | 372 | 357 | 332 | 350 | 344 | 479 | 438 |    |
| MET31xPDR1    | 182 | 394 | 370 | 155 | 260 | 279 | 378 |    |
| MET31xPHO4    | 173 | 313 | 121 | 160 | 126 | 261 | 192 |    |
| MET31xRDS1    | 125 | 111 | 105 | 132 | 113 | 260 | 203 |    |
| MET31xRPN4    | 122 | 148 | 84  | 136 | 118 | 159 | 138 |    |
| MET31xRSC3    | 209 | 424 | 310 | 171 | 272 | 343 | 394 |    |
| MET31xSKN7    | 222 | 415 | 330 | 191 | 314 | 318 | 363 |    |
| MET31xSTP3    | 271 | 369 | 380 | 306 | 286 | 307 | 298 |    |
| MET31xTYE7    | 173 | 387 | 173 | 147 | 204 | 281 | 246 |    |
| MET32xMET4    | 45  | 21  | 23  | 61  | 69  | 46  | 34  |    |

|            |     |     |     |      |     |      |     |
|------------|-----|-----|-----|------|-----|------|-----|
| MET32xPHO4 | 211 | 225 | 89  | 188  | 158 | 237  | 178 |
| MET32xTYE7 | 244 | 302 | 152 | 215  | 262 | 283  | 212 |
| MET4xRDS1  | 28  | 19  | 12  | 28   | 21  | 57   | 12  |
| MET4xRSC3  | 35  | 50  | 27  | 8    | 35  | 59   | 27  |
| MET4xSKN7  | 37  | 41  | 35  | 34   | 86  | 67   | 26  |
| MET4xSTB2  | 16  | 15  | 31  | 19   | 27  | 40   | 27  |
| MET4xTYE7  | 59  | 43  | 31  | 55   | 45  | 65   | 20  |
| MIG1xMIG3  | 385 | 344 | 397 | 350  | 442 | 498  | 440 |
| MIG1xMSN2  | 349 | 675 | 580 | 434  | 472 | 487  | 496 |
| MIG1xMSN4  | 538 | 588 | 547 | 662  | 472 | 800  | 496 |
| MIG1xNHP10 | 93  | 98  | 63  | 103  | 103 | 164  | 104 |
| MIG1xNRG1  | 327 | 413 | 313 | 239  | 332 | 424  | 346 |
| MIG1xOAF1  | 192 | 194 | 125 | 191  | 144 | 213  | 146 |
| MIG1xOPI1  | 59  | 83  | 49  | 82   | 65  | 68   | 47  |
| MIG1xPDR1  | 332 | 507 | 401 | 276  | 344 | 461  | 371 |
| MIG1xPDR3  | 94  | 32  | 55  | 80   | 83  | 98   | 72  |
| MIG1xPDR8  | 268 | 366 | 305 | 283  | 319 | 464  | 351 |
| MIG1xPHD1  | 281 | 545 | 440 | 312  | 360 | 494  | 399 |
| MIG1xPHO4  | 218 | 335 | 183 | 258  | 150 | 462  | 219 |
| MIG1xRCS1  | 334 | 563 | 414 | 316  | 355 | 531  | 337 |
| MIG1xRDS1  | 182 | 182 | 147 | 264  | 167 | 406  | 161 |
| MIG1xRDS2  | 431 | 622 | 422 | 276  | 344 | 426  | 384 |
| MIG1xREB1  | 198 | 207 | 258 | 220  | 266 | 374  | 256 |
| MIG1xRGM1  | 942 | 820 | 743 | 1148 | 820 | 1390 | 836 |
| MIG1xRGT1  | 325 | 533 | 502 | 314  | 335 | 432  | 383 |
| MIG1xRPH1  | 231 | 238 | 199 | 294  | 200 | 527  | 242 |
| MIG1xRSC30 | 45  | 30  | 23  | 39   | 19  | 162  | 24  |
| MIG1xRSC3  | 252 | 579 | 493 | 290  | 333 | 665  | 437 |
| MIG1xSFP1  | 229 | 435 | 393 | 206  | 335 | 373  | 299 |
| MIG1xSIP4  | 26  | 9   | 7   | 20   | 11  | 19   | 11  |
| MIG1xSKN7  | 308 | 557 | 452 | 297  | 415 | 595  | 405 |
| MIG1xSOK2  | 516 | 535 | 486 | 364  | 288 | 701  | 449 |
| MIG1xSTB2  | 191 | 413 | 370 | 245  | 264 | 347  | 317 |
| MIG1xSTB5  | 205 | 485 | 414 | 261  | 323 | 366  | 281 |
| MIG1xSTP1  | 277 | 559 | 367 | 327  | 288 | 524  | 381 |

|                  |     |     |     |      |     |      |     |
|------------------|-----|-----|-----|------|-----|------|-----|
| MIG1xSTP2        | 101 | 104 | 77  | 122  | 46  | 196  | 122 |
| MIG1xSUT1        | 356 | 640 | 567 | 326  | 432 | 583  | 413 |
| MIG1xSUT2        | 103 | 104 | 86  | 113  | 114 | 99   | 71  |
| MIG1xUGA3        | 139 | 98  | 82  | 152  | 93  | 237  | 91  |
| MIG1xUME6        | 156 | 31  | 71  | 169  | 75  | 249  | 152 |
| MIG1xYBL054W301  |     | 579 | 384 | 270  | 375 | 468  | 379 |
| MIG1xYDR026C 180 |     | 180 | 156 | 223  | 207 | 340  | 163 |
| MIG1xYER184C 510 |     | 535 | 539 | 367  | 464 | 635  | 521 |
| MIG1xYJL103C 774 |     | 709 | 520 | 978  | 584 | 1014 | 629 |
| MIG1xYLL054C 51  |     | 47  | 24  | 56   | 24  | 148  | 55  |
| MIG1xYPL230W942  |     | 820 | 743 | 1148 | 820 | 1390 | 836 |
| MIG1xYRM1        | 219 | 473 | 488 | 310  | 328 | 561  | 429 |
| MIG1xZMS1        | 403 | 792 | 652 | 450  | 506 | 664  | 542 |
| MIG2xMOT3        | 17  | 10  | 45  | 21   | 14  | 7    | 45  |
| MIG2xOAF1        | 11  | 2   | 6   | 15   | 4   | 8    | 11  |
| MIG2xRGM1        | 49  | 10  | 15  | 69   | 23  | 54   | 44  |
| MIG2xSOK2        | 33  | 9   | 29  | 26   | 4   | 27   | 21  |
| MIG2xSTP2        | 2   | 5   | 0   | 9    | 1   | 7    | 9   |
| MIG2xSUT1        | 13  | 7   | 18  | 32   | 14  | 10   | 22  |
| MIG2xSUT2        | 5   | 1   | 2   | 6    | 6   | 7    | 2   |
| MIG2xYAP7        | 3   | 3   | 3   | 8    | 5   | 12   | 6   |
| MIG2xYJL103C 25  |     | 11  | 9   | 30   | 33  | 37   | 22  |
| MIG2xYPL230W49   |     | 10  | 15  | 69   | 23  | 54   | 44  |
| MIG3xMSN2        | 329 | 399 | 379 | 337  | 436 | 380  | 552 |
| MIG3xMSN4        | 506 | 342 | 362 | 517  | 436 | 622  | 552 |
| MIG3xNRG1        | 259 | 221 | 195 | 177  | 299 | 282  | 367 |
| MIG3xOAF1        | 139 | 118 | 86  | 134  | 152 | 157  | 148 |
| MIG3xOPI1        | 50  | 46  | 36  | 52   | 48  | 37   | 66  |
| MIG3xPDR1        | 253 | 280 | 267 | 218  | 338 | 326  | 368 |
| MIG3xPDR8        | 215 | 209 | 189 | 227  | 329 | 355  | 347 |
| MIG3xPHD1        | 213 | 292 | 273 | 215  | 357 | 339  | 423 |
| MIG3xRDS1        | 152 | 123 | 102 | 179  | 145 | 283  | 199 |
| MIG3xRDS2        | 344 | 368 | 278 | 172  | 348 | 249  | 363 |
| MIG3xREB1        | 171 | 139 | 152 | 164  | 236 | 207  | 240 |
| MIG3xRGM1        | 831 | 484 | 486 | 859  | 766 | 1030 | 909 |

|              |     |     |     |      |     |      |     |     |
|--------------|-----|-----|-----|------|-----|------|-----|-----|
| MIG3xRGT1    | 290 | 304 | 322 | 253  | 316 | 300  | 381 |     |
| MIG3xRPH1    | 220 | 134 | 140 | 218  | 175 | 392  | 254 |     |
| MIG3xRPN4    | 108 | 96  | 99  | 151  | 115 | 184  | 145 |     |
| MIG3xRSC3    | 209 | 348 | 339 | 212  | 344 | 403  | 427 |     |
| MIG3xSKN7    | 259 | 329 | 270 | 198  | 372 | 423  | 404 |     |
| MIG3xSOK2    | 430 | 282 | 311 | 252  | 265 | 526  | 465 |     |
| MIG3xSTB2    | 157 | 249 | 216 | 148  | 260 | 201  | 273 |     |
| MIG3xSTB5    | 159 | 268 | 296 | 152  | 340 | 227  | 284 |     |
| MIG3xSTP1    | 249 | 321 | 238 | 234  | 271 | 390  | 391 |     |
| MIG3xSTP2    | 90  | 68  | 48  | 102  | 41  | 132  | 128 |     |
| MIG3xSTP3    | 273 | 276 | 255 | 281  | 300 | 334  | 259 |     |
| MIG3xSUT1    | 349 | 361 | 380 | 233  | 413 | 417  | 432 |     |
| MIG3xSUT2    | 76  | 72  | 63  | 69   | 122 | 67   | 63  |     |
| MIG3xUGA3    | 116 | 47  | 50  | 100  | 104 | 172  | 102 |     |
| MIG3xUME6    | 125 | 22  | 54  | 121  | 69  | 193  | 156 |     |
| MIG3xYDR026C | 128 | 106 | 95  | 134  | 185 | 219  | 163 |     |
| MIG3xYDR520C | 20  | 12  | 15  | 24   | 31  | 34   | 31  |     |
| MIG3xYER130C | 71  | 39  | 46  | 62   | 82  | 82   | 65  |     |
| MIG3xYER184C | 430 | 293 | 343 | 241  | 396 | 441  | 507 |     |
| MIG3xYJL103C | 637 | 383 | 330 | 670  | 540 | 672  | 622 |     |
| MIG3xYLL054C | 37  | 27  | 17  | 36   | 33  | 112  | 54  |     |
| MIG3xYPL230W | 831 | 484 | 486 | 859  | 766 | 1030 | 909 |     |
| MIG3xYPR196W |     | 232 | 283 | 315  | 217 | 315  | 298 | 354 |
| MIG3xYRM1    | 204 | 269 | 314 | 213  | 316 | 386  | 423 |     |
| MIG3xZMS1    | 354 | 431 | 438 | 333  | 510 | 478  | 639 |     |
| MOT3xSKN7    | 237 | 663 | 726 | 238  | 631 | 355  | 790 |     |
| MOT3xUSV1    | 7   | 8   | 27  | 14   | 16  | 11   | 30  |     |
| MSN2xMSN4    | 551 | 636 | 660 | 771  | 514 | 668  | 604 |     |
| MSN2xNDD1    | 122 | 63  | 90  | 152  | 196 | 130  | 71  |     |
| MSN2xPHD1    | 272 | 602 | 485 | 248  | 391 | 351  | 436 |     |
| MSN2xPHO4    | 251 | 392 | 188 | 266  | 218 | 281  | 251 |     |
| MSN2xREB1    | 228 | 277 | 288 | 282  | 341 | 264  | 320 |     |
| MSN2xRGM1    | 937 | 917 | 929 | 1219 | 906 | 1146 | 993 |     |
| MSN2xRPH1    | 224 | 311 | 232 | 284  | 210 | 318  | 315 |     |
| MSN2xRSC3    | 244 | 713 | 622 | 266  | 448 | 315  | 471 |     |

|                 |      |      |     |      |      |      |      |     |
|-----------------|------|------|-----|------|------|------|------|-----|
| MSN2xSKN7       | 263  | 597  | 515 | 293  | 428  | 373  | 463  |     |
| MSN2xSOK2       | 460  | 588  | 573 | 246  | 392  | 538  | 537  |     |
| MSN2xSUT1       | 320  | 672  | 618 | 287  | 483  | 403  | 471  |     |
| MSN2xYDR026C    |      | 184  | 240 | 167  | 233  | 247  | 226  | 201 |
| MSN2xYER184C383 |      | 539  | 570 | 299  | 482  | 455  | 494  |     |
| MSN2xYJL103C    | 629  | 650  | 513 | 816  | 597  | 735  | 585  |     |
| MSN2xYPL230W    |      | 937  | 917 | 929  | 1219 | 906  | 1146 | 993 |
| MSN2xZMS1       | 359  | 876  | 733 | 426  | 515  | 514  | 683  |     |
| MSN4xNDD1       | 154  | 63   | 78  | 203  | 196  | 174  | 71   |     |
| MSN4xNRG1       | 407  | 319  | 360 | 367  | 360  | 426  | 420  |     |
| MSN4xPHD1       | 387  | 499  | 438 | 362  | 391  | 568  | 436  |     |
| MSN4xRDS1       | 265  | 128  | 142 | 327  | 183  | 410  | 188  |     |
| MSN4xREB1       | 294  | 222  | 258 | 377  | 341  | 384  | 320  |     |
| MSN4xRGM1       | 1367 | 745  | 788 | 1854 | 906  | 1773 | 993  |     |
| MSN4xRPH1       | 349  | 241  | 204 | 425  | 210  | 537  | 315  |     |
| MSN4xRSC3       | 359  | 554  | 532 | 433  | 448  | 538  | 471  |     |
| MSN4xSKN7       | 389  | 491  | 471 | 441  | 428  | 607  | 463  |     |
| MSN4xSTP1       | 395  | 465  | 362 | 405  | 325  | 542  | 420  |     |
| MSN4xSUT1       | 499  | 566  | 551 | 468  | 483  | 685  | 471  |     |
| MSN4xUGA3       | 156  | 90   | 89  | 214  | 108  | 276  | 116  |     |
| MSN4xXBP1       | 393  | 407  | 386 | 465  | 483  | 447  | 339  |     |
| MSN4xYDR026C    |      | 265  | 196 | 153  | 355  | 247  | 348  | 201 |
| MSN4xYER184C549 |      | 471  | 528 | 436  | 482  | 689  | 494  |     |
| MSN4xYJL103C    | 883  | 588  | 496 | 1187 | 597  | 1102 | 585  |     |
| MSN4xYLL054C    | 46   | 34   | 21  | 62   | 49   | 117  | 38   |     |
| MSN4xYPL230W    |      | 1367 | 745 | 788  | 1854 | 906  | 1773 | 993 |
| MSN4xZMS1       | 521  | 721  | 651 | 673  | 515  | 834  | 683  |     |
| NDD1xRDR1       | 99   | 30   | 42  | 91   | 67   | 102  | 72   |     |
| NDD1xRDS2       | 102  | 66   | 69  | 89   | 137  | 70   | 77   |     |
| NDD1xRSC30      | 18   | 6    | 6   | 9    | 6    | 23   | 10   |     |
| NDD1xRSC3       | 102  | 58   | 81  | 80   | 182  | 118  | 109  |     |
| NDD1xSTB1       | 135  | 61   | 86  | 100  | 177  | 117  | 103  |     |
| NDD1xSTP1       | 75   | 67   | 65  | 59   | 116  | 99   | 90   |     |
| NDD1xSTP2       | 23   | 8    | 14  | 30   | 29   | 35   | 23   |     |
| NDD1xSUT1       | 106  | 45   | 87  | 92   | 152  | 134  | 77   |     |



|                  |     |     |     |     |     |     |     |     |
|------------------|-----|-----|-----|-----|-----|-----|-----|-----|
| NDD1xSWI4        | 135 | 59  | 86  | 97  | 166 | 113 | 90  |     |
| NDD1xSWI6        | 106 | 61  | 90  | 92  | 172 | 117 | 86  |     |
| NDD1xBBP1        | 126 | 58  | 85  | 128 | 241 | 122 | 91  |     |
| NDD1xYLL054C     | 5   | 1   | 9   | 4   | 13  | 31  | 8   |     |
| NDT80xSKN7       | 9   | 10  | 14  | 13  | 4   | 8   | 6   |     |
| NHP10xNRG1       | 72  | 79  | 29  | 61  | 74  | 104 | 108 |     |
| NHP10xOAF1       | 34  | 22  | 10  | 25  | 38  | 60  | 39  |     |
| NHP10xPDR1       | 77  | 79  | 56  | 54  | 65  | 121 | 89  |     |
| NHP10xPDR8       | 75  | 57  | 40  | 58  | 86  | 125 | 111 |     |
| NHP10xPHD1       | 52  | 82  | 55  | 51  | 82  | 128 | 114 |     |
| NHP10xRDS1       | 37  | 45  | 18  | 48  | 25  | 131 | 40  |     |
| NHP10xRDS2       | 113 | 97  | 47  | 69  | 98  | 99  | 90  |     |
| NHP10xRGM1       | 238 | 153 | 86  | 248 | 153 | 311 | 225 |     |
| NHP10xRSC30      | 12  | 9   | 0   | 10  | 3   | 40  | 7   |     |
| NHP10xRSC3       | 91  | 98  | 60  | 57  | 72  | 163 | 130 |     |
| NHP10xSKN7       | 71  | 80  | 55  | 71  | 85  | 157 | 101 |     |
| NHP10xSTB5       | 64  | 79  | 55  | 58  | 88  | 80  | 81  |     |
| NHP10xSTP1       | 69  | 71  | 46  | 52  | 71  | 142 | 82  |     |
| NHP10xSTP2       | 27  | 12  | 12  | 22  | 9   | 52  | 28  |     |
| NHP10xSUT1       | 81  | 101 | 78  | 71  | 87  | 148 | 90  |     |
| NHP10xYBL054W    |     | 73  | 94  | 58  | 49  | 66  | 121 | 85  |
| NHP10xYER184C    |     | 105 | 80  | 56  | 81  | 85  | 142 | 130 |
| NHP10xYJL103C157 |     | 115 | 47  | 213 | 107 | 218 | 154 |     |
| NHP10xYPL230W    |     | 238 | 153 | 86  | 248 | 153 | 311 | 225 |
| NHP10xYPR196W    |     | 56  | 73  | 54  | 48  | 80  | 92  | 82  |
| NHP10xYRM1       | 58  | 81  | 52  | 67  | 88  | 145 | 118 |     |
| NHP10xZMS1       | 101 | 135 | 84  | 87  | 97  | 168 | 134 |     |
| NHP6AxNHP6B      | 398 | 835 | 438 | 179 | 222 | 178 | 430 |     |
| NHP6AxPHO2       | 565 | 658 | 406 | 155 | 276 | 378 | 372 |     |
| NHP6AxRLM1       | 174 | 120 | 202 | 148 | 204 | 225 | 159 |     |
| NHP6AxSPT15      | 255 | 816 | 350 | 188 | 224 | 204 | 297 |     |
| NHP6AxSTB5       | 243 | 341 | 350 | 156 | 241 | 230 | 308 |     |
| NHP6BxPHO2       | 697 | 764 | 394 | 134 | 240 | 363 | 415 |     |
| NHP6BxRLM1       | 205 | 126 | 240 | 174 | 190 | 181 | 297 |     |
| NHP6BxSTB5       | 222 | 318 | 382 | 168 | 237 | 195 | 365 |     |

|                 |     |     |     |     |     |     |     |     |
|-----------------|-----|-----|-----|-----|-----|-----|-----|-----|
| NRG1xOPI1       | 45  | 73  | 44  | 83  | 59  | 40  | 51  |     |
| NRG1xPDR1       | 224 | 339 | 377 | 135 | 292 | 230 | 302 |     |
| NRG1xPHD1       | 216 | 342 | 354 | 172 | 323 | 326 | 371 |     |
| NRG1xRDR1       | 206 | 164 | 210 | 160 | 230 | 245 | 287 |     |
| NRG1xRDS1       | 141 | 107 | 126 | 152 | 147 | 271 | 187 |     |
| NRG1xREB1       | 199 | 176 | 187 | 145 | 268 | 236 | 286 |     |
| NRG1xRGM1       | 722 | 469 | 509 | 667 | 723 | 790 | 717 |     |
| NRG1xRIM101     | 137 | 72  | 87  | 104 | 100 | 129 | 102 |     |
| NRG1xRSC3       | 258 | 348 | 349 | 184 | 345 | 312 | 414 |     |
| NRG1xSKN7       | 199 | 387 | 335 | 173 | 422 | 302 | 340 |     |
| NRG1xSTB2       | 203 | 259 | 265 | 147 | 306 | 222 | 299 |     |
| NRG1xSUT1       | 271 | 431 | 355 | 167 | 342 | 278 | 378 |     |
| NRG1xTBF1       | 201 | 270 | 249 | 181 | 211 | 254 | 253 |     |
| NRG1xYBL054W    |     | 256 | 318 | 349 | 172 | 422 | 341 | 395 |
| NRG1xYDR026C169 |     | 130 | 108 | 137 | 195 | 202 | 182 |     |
| NRG1xYER184C340 |     | 382 | 445 | 218 | 418 | 354 | 433 |     |
| NRG1xYJL103C568 |     | 454 | 381 | 572 | 504 | 586 | 539 |     |
| NRG1xYPL230W    |     | 722 | 469 | 509 | 667 | 723 | 790 | 717 |
| NRG1xZMS1       | 319 | 382 | 341 | 227 | 398 | 356 | 460 |     |
| OAF1xOPI1       | 34  | 20  | 12  | 40  | 39  | 37  | 25  |     |
| OAF1xPDR1       | 124 | 142 | 118 | 101 | 113 | 112 | 143 |     |
| OAF1xPDR3       | 58  | 5   | 18  | 29  | 36  | 26  | 30  |     |
| OAF1xPDR8       | 152 | 96  | 77  | 146 | 132 | 186 | 127 |     |
| OAF1xRDS1       | 61  | 29  | 48  | 80  | 40  | 105 | 65  |     |
| OAF1xRGT1       | 139 | 129 | 130 | 140 | 136 | 164 | 115 |     |
| OAF1xSTB5       | 78  | 127 | 114 | 125 | 147 | 131 | 113 |     |
| OAF1xSTP1       | 124 | 132 | 92  | 110 | 103 | 105 | 120 |     |
| OAF1xSUT1       | 156 | 132 | 136 | 105 | 124 | 157 | 144 |     |
| OAF1xTYE7       | 93  | 164 | 51  | 94  | 97  | 90  | 102 |     |
| OAF1xUME6       | 59  | 15  | 29  | 57  | 26  | 44  | 44  |     |
| OAF1xYJL103C311 |     | 180 | 145 | 360 | 181 | 316 | 176 |     |
| OAF1xYPL230W337 |     | 200 | 164 | 439 | 308 | 379 | 256 |     |
| OAF1xYPR196W    |     | 156 | 131 | 131 | 129 | 127 | 167 | 114 |
| OAF1xZMS1       | 139 | 217 | 141 | 148 | 200 | 160 | 186 |     |
| OPI1xRDS2       | 59  | 105 | 56  | 57  | 65  | 60  | 60  |     |

|              |     |     |     |     |     |     |     |
|--------------|-----|-----|-----|-----|-----|-----|-----|
| OPI1xREB1    | 42  | 34  | 34  | 55  | 51  | 55  | 49  |
| OPI1xRGM1    | 124 | 115 | 74  | 193 | 144 | 149 | 127 |
| OPI1xRSC30   | 9   | 0   | 3   | 13  | 11  | 20  | 5   |
| OPI1xRSC3    | 66  | 61  | 64  | 98  | 109 | 79  | 46  |
| OPI1xSFP1    | 44  | 82  | 50  | 52  | 62  | 58  | 55  |
| OPI1xSTB2    | 38  | 47  | 46  | 45  | 64  | 51  | 50  |
| OPI1xSTP3    | 70  | 99  | 53  | 110 | 110 | 89  | 60  |
| OPI1xSUT1    | 51  | 102 | 60  | 49  | 83  | 41  | 46  |
| OPI1xSUT2    | 17  | 19  | 7   | 26  | 24  | 27  | 17  |
| OPI1xYBL054W | 87  | 84  | 64  | 55  | 86  | 78  | 68  |
| OPI1xYDR026C | 44  | 31  | 28  | 48  | 42  | 51  | 46  |
| OPI1xYER184C | 96  | 85  | 69  | 86  | 113 | 120 | 98  |
| OPI1xYJL103C | 165 | 110 | 78  | 222 | 124 | 184 | 134 |
| OPI1xYPL230W | 124 | 115 | 74  | 193 | 144 | 149 | 127 |
| OPI1xYPR196W | 33  | 69  | 48  | 43  | 57  | 56  | 54  |
| OPI1xZMS1    | 51  | 116 | 46  | 72  | 61  | 57  | 84  |
| PBF1xPBF2    | 70  | 73  | 33  | 60  | 94  | 106 | 58  |
| PBF1xSTB3    | 144 | 76  | 80  | 146 | 134 | 173 | 111 |
| PBF2xRTG1    | 2   | 16  | 4   | 7   | 3   | 11  | 5   |
| PBF2xSTB3    | 283 | 269 | 253 | 255 | 411 | 491 | 311 |
| PBF2xXBP1    | 304 | 353 | 210 | 178 | 296 | 329 | 279 |
| PBF2xYBL054W | 217 | 398 | 219 | 163 | 401 | 334 | 322 |
| PDR1xPDR3    | 109 | 35  | 71  | 77  | 75  | 81  | 77  |
| PDR1xRDR1    | 233 | 228 | 255 | 252 | 199 | 217 | 250 |
| PDR1xRDS1    | 116 | 177 | 159 | 176 | 357 | 258 | 170 |
| PDR1xRDS2    | 301 | 508 | 368 | 188 | 308 | 244 | 360 |
| PDR1xREB1    | 173 | 228 | 241 | 156 | 258 | 242 | 245 |
| PDR1xRGM1    | 677 | 703 | 605 | 647 | 691 | 903 | 658 |
| PDR1xRGT1    | 201 | 425 | 380 | 210 | 327 | 216 | 294 |
| PDR1xRSC30   | 31  | 29  | 25  | 26  | 36  | 75  | 22  |
| PDR1xRSC3    | 243 | 578 | 446 | 172 | 326 | 364 | 382 |
| PDR1xRTG3    | 197 | 378 | 408 | 186 | 214 | 257 | 291 |
| PDR1xSKN7    | 233 | 553 | 467 | 195 | 401 | 356 | 329 |
| PDR1xSTB1    | 184 | 401 | 381 | 170 | 237 | 233 | 366 |
| PDR1xSTB2    | 168 | 331 | 324 | 157 | 263 | 255 | 295 |

|              |     |     |     |     |     |     |     |
|--------------|-----|-----|-----|-----|-----|-----|-----|
| PDR1xSTB4    | 141 | 187 | 157 | 125 | 191 | 183 | 186 |
| PDR1xSTP1    | 239 | 540 | 337 | 186 | 258 | 401 | 308 |
| PDR1xSUT1    | 297 | 606 | 474 | 235 | 329 | 432 | 362 |
| PDR1xSWI4    | 239 | 372 | 387 | 138 | 204 | 265 | 318 |
| PDR1xUGA3    | 94  | 88  | 83  | 89  | 81  | 148 | 90  |
| PDR1xUME6    | 115 | 43  | 63  | 132 | 73  | 181 | 129 |
| PDR1xYDR026C | 142 | 194 | 124 | 144 | 155 | 208 | 146 |
| PDR1xYER184C | 303 | 473 | 472 | 217 | 388 | 398 | 415 |
| PDR1xYJL103C | 499 | 564 | 423 | 576 | 492 | 615 | 520 |
| PDR1xYLL054C | 26  | 46  | 29  | 27  | 43  | 110 | 25  |
| PDR1xYPL230W | 677 | 703 | 605 | 647 | 691 | 903 | 658 |
| PDR1xYRM1    | 235 | 430 | 399 | 198 | 279 | 297 | 334 |
| PDR1xZMS1    | 284 | 605 | 449 | 290 | 407 | 458 | 455 |
| PDR3xPDR8    | 85  | 19  | 37  | 62  | 62  | 84  | 93  |
| PDR3xPHO4    | 60  | 18  | 19  | 65  | 36  | 87  | 44  |
| PDR3xRDR1    | 92  | 18  | 40  | 80  | 61  | 62  | 62  |
| PDR3xRDS1    | 60  | 16  | 28  | 57  | 36  | 88  | 39  |
| PDR3xRGT1    | 85  | 24  | 48  | 60  | 72  | 48  | 64  |
| PDR3xRSC3    | 60  | 49  | 50  | 67  | 97  | 102 | 108 |
| PDR3xRTG3    | 47  | 22  | 48  | 48  | 51  | 60  | 50  |
| PDR3xSKN7    | 66  | 28  | 40  | 56  | 96  | 90  | 68  |
| PDR3xSKO1    | 71  | 24  | 35  | 52  | 48  | 80  | 66  |
| PDR3xSTB5    | 48  | 22  | 49  | 48  | 69  | 58  | 56  |
| PDR3xSTP1    | 69  | 38  | 53  | 68  | 79  | 97  | 65  |
| PDR3xSUT1    | 115 | 40  | 64  | 87  | 88  | 124 | 89  |
| PDR3xSUT2    | 23  | 2   | 2   | 27  | 18  | 11  | 13  |
| PDR3xTYE7    | 91  | 32  | 30  | 72  | 43  | 92  | 43  |
| PDR3xUME6    | 44  | 3   | 7   | 35  | 21  | 26  | 17  |
| PDR3xYER184C | 79  | 38  | 59  | 44  | 75  | 103 | 89  |
| PDR3xYJL103C | 134 | 41  | 48  | 144 | 94  | 154 | 107 |
| PDR3xYRM1    | 71  | 26  | 48  | 64  | 68  | 82  | 71  |
| PDR8xPHO4    | 132 | 212 | 107 | 146 | 146 | 251 | 182 |
| PDR8xRDR1    | 208 | 133 | 184 | 202 | 199 | 290 | 286 |
| PDR8xRDS1    | 121 | 85  | 110 | 149 | 131 | 270 | 176 |
| PDR8xREB1    | 159 | 129 | 163 | 161 | 254 | 284 | 256 |

|              |     |     |     |     |     |      |     |     |
|--------------|-----|-----|-----|-----|-----|------|-----|-----|
| PDR8xRGT1    | 242 | 333 | 302 | 256 | 302 | 323  | 325 |     |
| PDR8xRSC30   | 35  | 12  | 24  | 19  | 27  | 64   | 25  |     |
| PDR8xRSC3    | 221 | 315 | 296 | 199 | 309 | 372  | 358 |     |
| PDR8xSTB1    | 179 | 317 | 258 | 154 | 237 | 305  | 333 |     |
| PDR8xSTB5    | 187 | 294 | 264 | 188 | 278 | 321  | 318 |     |
| PDR8xSTP1    | 198 | 287 | 212 | 210 | 243 | 393  | 292 |     |
| PDR8xSUT1    | 251 | 336 | 308 | 216 | 267 | 387  | 365 |     |
| PDR8xSUT2    | 89  | 44  | 39  | 80  | 85  | 80   | 68  |     |
| PDR8xTYE7    | 168 | 342 | 160 | 150 | 191 | 271  | 216 |     |
| PDR8xUME6    | 98  | 28  | 39  | 90  | 76  | 135  | 102 |     |
| PDR8xYER184C | 308 | 278 | 348 | 209 | 367 | 474  | 424 |     |
| PDR8xYJL103C | 516 | 382 | 311 | 577 | 479 | 796  | 511 |     |
| PDR8xYPR196W |     | 252 | 312 | 297 | 256 | 290  | 336 | 328 |
| PDR8xYRM1    | 206 | 295 | 289 | 196 | 307 | 468  | 378 |     |
| PHD1xPHO4    | 210 | 399 | 175 | 170 | 200 | 318  | 244 |     |
| PHD1xRDS1    | 166 | 149 | 127 | 176 | 184 | 331  | 204 |     |
| PHD1xREB1    | 176 | 168 | 265 | 153 | 235 | 235  | 232 |     |
| PHD1xRGM1    | 646 | 745 | 623 | 636 | 695 | 1003 | 740 |     |
| PHD1xRPH1    | 170 | 257 | 169 | 162 | 172 | 382  | 258 |     |
| PHD1xRSC30   | 20  | 45  | 12  | 17  | 35  | 107  | 27  |     |
| PHD1xRSC3    | 186 | 773 | 448 | 174 | 386 | 532  | 436 |     |
| PHD1xSKN7    | 210 | 523 | 430 | 183 | 402 | 428  | 360 |     |
| PHD1xSOK2    | 435 | 503 | 459 | 199 | 286 | 569  | 516 |     |
| PHD1xSTB2    | 168 | 344 | 360 | 149 | 262 | 214  | 291 |     |
| PHD1xSTP1    | 232 | 504 | 366 | 201 | 301 | 409  | 398 |     |
| PHD1xSTP2    | 90  | 91  | 78  | 86  | 53  | 161  | 136 |     |
| PHD1xSUT1    | 265 | 633 | 437 | 227 | 392 | 415  | 397 |     |
| PHD1xTYE7    | 201 | 468 | 220 | 147 | 277 | 295  | 256 |     |
| PHD1xUGA3    | 89  | 86  | 72  | 104 | 89  | 197  | 96  |     |
| PHD1xBBP1    | 207 | 427 | 360 | 200 | 382 | 294  | 315 |     |
| PHD1xYDR026C | 140 | 160 | 125 | 141 | 185 | 214  | 139 |     |
| PHD1xYER184C | 245 | 509 | 456 | 209 | 385 | 411  | 440 |     |
| PHD1xYJL103C | 431 | 623 | 438 | 569 | 449 | 657  | 545 |     |
| PHD1xYPL230W | 646 | 745 | 623 | 636 | 695 | 1003 | 740 |     |
| PHD1xZMS1    | 262 | 668 | 497 | 273 | 451 | 451  | 506 |     |

|              |     |     |     |     |     |     |     |
|--------------|-----|-----|-----|-----|-----|-----|-----|
| PHO2xSPT15   | 351 | 709 | 398 | 166 | 203 | 375 | 372 |
| PHO4xRAP1    | 137 | 63  | 32  | 75  | 55  | 90  | 68  |
| PHO4xRDS1    | 134 | 92  | 54  | 180 | 125 | 264 | 118 |
| PHO4xREB1    | 185 | 160 | 148 | 208 | 155 | 262 | 202 |
| PHO4xRSC3    | 181 | 418 | 222 | 191 | 231 | 441 | 280 |
| PHO4xSFP1    | 202 | 284 | 118 | 168 | 124 | 216 | 187 |
| PHO4xSKN7    | 175 | 279 | 199 | 161 | 244 | 343 | 260 |
| PHO4xSTB2    | 184 | 255 | 174 | 205 | 156 | 229 | 220 |
| PHO4xSTB4    | 135 | 146 | 58  | 144 | 84  | 147 | 99  |
| PHO4xSTP1    | 192 | 315 | 133 | 169 | 190 | 305 | 251 |
| PHO4xSTP2    | 46  | 55  | 34  | 77  | 36  | 105 | 77  |
| PHO4xSUT1    | 192 | 335 | 208 | 175 | 205 | 363 | 245 |
| PHO4xTBF1    | 162 | 229 | 144 | 154 | 126 | 206 | 163 |
| PHO4xTYE7    | 260 | 470 | 167 | 276 | 162 | 449 | 219 |
| PHO4xYDR026C | 160 | 139 | 84  | 172 | 118 | 261 | 127 |
| PHO4xYLL054C | 21  | 19  | 5   | 37  | 47  | 89  | 27  |
| PHO4xYRM1    | 146 | 260 | 152 | 208 | 135 | 320 | 224 |
| RAP1xRCS1    | 129 | 144 | 92  | 95  | 118 | 130 | 95  |
| RAP1xRPH1    | 134 | 44  | 35  | 86  | 83  | 153 | 67  |
| RAP1xRSC3    | 145 | 204 | 74  | 110 | 120 | 135 | 116 |
| RAP1xSFP1    | 218 | 139 | 108 | 127 | 147 | 119 | 111 |
| RAP1xSTP1    | 86  | 96  | 56  | 65  | 123 | 137 | 93  |
| RAP1xSTP2    | 31  | 22  | 18  | 30  | 20  | 44  | 15  |
| RAP1xTYE7    | 107 | 96  | 38  | 65  | 63  | 104 | 76  |
| RAP1xYJL103C | 289 | 162 | 92  | 291 | 180 | 249 | 147 |
| RAP1xYLL054C | 10  | 20  | 4   | 10  | 11  | 52  | 11  |
| RCS1xRPH1    | 227 | 270 | 174 | 193 | 155 | 308 | 236 |
| RCS1xRSC3    | 252 | 647 | 392 | 191 | 322 | 398 | 368 |
| RCS1xSFP1    | 213 | 486 | 395 | 164 | 257 | 262 | 287 |
| RCS1xSOK2    | 441 | 600 | 459 | 209 | 257 | 594 | 478 |
| RCS1xSTP2    | 84  | 95  | 53  | 92  | 36  | 120 | 99  |
| RCS1xSUT1    | 257 | 571 | 447 | 208 | 350 | 401 | 346 |
| RCS1xZMS1    | 291 | 713 | 484 | 259 | 407 | 438 | 448 |
| RDR1xRGT1    | 188 | 226 | 216 | 265 | 200 | 276 | 306 |
| RDR1xRSC30   | 39  | 6   | 10  | 36  | 25  | 54  | 28  |

|              |     |     |     |     |     |     |     |
|--------------|-----|-----|-----|-----|-----|-----|-----|
| RDR1xRSC3    | 249 | 200 | 227 | 234 | 234 | 295 | 352 |
| RDR1xSKN7    | 230 | 235 | 214 | 181 | 225 | 303 | 318 |
| RDR1xSTB1    | 199 | 253 | 233 | 186 | 182 | 233 | 315 |
| RDR1xSTP1    | 198 | 227 | 189 | 210 | 194 | 293 | 300 |
| RDR1xSUT1    | 252 | 257 | 238 | 241 | 185 | 325 | 320 |
| RDR1xUGA3    | 97  | 42  | 39  | 102 | 68  | 144 | 72  |
| RDR1xYRM1    | 225 | 202 | 243 | 238 | 185 | 348 | 335 |
| RDS1xRDS2    | 181 | 171 | 119 | 154 | 163 | 219 | 213 |
| RDS1xREB1    | 106 | 82  | 60  | 154 | 125 | 193 | 126 |
| RDS1xRGM1    | 451 | 184 | 209 | 580 | 326 | 753 | 337 |
| RDS1xRGT1    | 88  | 120 | 109 | 158 | 132 | 203 | 148 |
| RDS1xRPH1    | 89  | 72  | 54  | 130 | 75  | 287 | 142 |
| RDS1xRPN4    | 66  | 56  | 48  | 100 | 37  | 111 | 78  |
| RDS1xRSC30   | 14  | 19  | 15  | 10  | 24  | 92  | 10  |
| RDS1xRSC3    | 108 | 220 | 154 | 143 | 164 | 365 | 195 |
| RDS1xSKN7    | 154 | 194 | 151 | 231 | 247 | 311 | 176 |
| RDS1xSTB1    | 102 | 141 | 115 | 145 | 124 | 233 | 178 |
| RDS1xSTB2    | 108 | 122 | 88  | 132 | 111 | 207 | 177 |
| RDS1xSTB5    | 115 | 112 | 134 | 135 | 119 | 185 | 171 |
| RDS1xSTP1    | 177 | 152 | 97  | 182 | 140 | 370 | 161 |
| RDS1xSTP2    | 40  | 30  | 24  | 67  | 20  | 133 | 53  |
| RDS1xSUT1    | 167 | 215 | 194 | 218 | 181 | 382 | 195 |
| RDS1xSWI4    | 153 | 140 | 120 | 118 | 108 | 271 | 158 |
| RDS1xSWI6    | 100 | 121 | 113 | 143 | 83  | 221 | 200 |
| RDS1xUGA3    | 63  | 25  | 30  | 78  | 54  | 170 | 44  |
| RDS1xUME6    | 69  | 8   | 8   | 96  | 53  | 125 | 58  |
| RDS1xBBP1    | 109 | 115 | 102 | 176 | 195 | 235 | 134 |
| RDS1xYDR026C | 89  | 55  | 37  | 134 | 89  | 193 | 96  |
| RDS1xYDR520C | 12  | 4   | 12  | 12  | 12  | 33  | 5   |
| RDS1xYER184C | 176 | 166 | 132 | 146 | 218 | 321 | 211 |
| RDS1xYJL103C | 282 | 172 | 140 | 419 | 245 | 517 | 251 |
| RDS1xYLL054C | 22  | 19  | 9   | 43  | 43  | 111 | 26  |
| RDS1xYPL230W | 451 | 184 | 209 | 580 | 326 | 753 | 337 |
| RDS1xYRM1    | 137 | 115 | 143 | 169 | 123 | 320 | 184 |
| RDS1xZMS1    | 167 | 174 | 172 | 250 | 167 | 383 | 251 |

|              |     |     |     |     |     |     |     |
|--------------|-----|-----|-----|-----|-----|-----|-----|
| RDS2xRGM1    | 831 | 742 | 557 | 699 | 728 | 720 | 752 |
| RDS2xSKN7    | 339 | 488 | 421 | 206 | 344 | 283 | 378 |
| RDS2xSNT2    | 25  | 4   | 9   | 16  | 4   | 15  | 6   |
| RDS2xSTB3    | 231 | 200 | 181 | 175 | 231 | 204 | 207 |
| RDS2xSTB4    | 222 | 219 | 131 | 153 | 166 | 218 | 196 |
| RDS2xSTB5    | 234 | 433 | 382 | 140 | 300 | 259 | 287 |
| RDS2xSTP1    | 302 | 527 | 322 | 201 | 282 | 228 | 353 |
| RDS2xSUT1    | 375 | 568 | 442 | 186 | 337 | 296 | 371 |
| RDS2xTYE7    | 207 | 506 | 173 | 156 | 190 | 219 | 256 |
| RDS2xYDR026C | 212 | 197 | 150 | 158 | 163 | 194 | 183 |
| RDS2xYJL103C | 725 | 677 | 422 | 621 | 495 | 627 | 574 |
| RDS2xYPL230W | 831 | 742 | 557 | 699 | 728 | 720 | 752 |
| RDS2xYPR196W | 241 | 482 | 415 | 174 | 330 | 230 | 317 |
| RDS2xZMS1    | 361 | 701 | 415 | 240 | 427 | 308 | 434 |
| REB1xRGM1    | 528 | 355 | 384 | 651 | 634 | 719 | 597 |
| REB1xRSC30   | 18  | 11  | 6   | 13  | 11  | 52  | 21  |
| REB1xRSC3    | 158 | 188 | 226 | 168 | 199 | 278 | 223 |
| REB1xSKN7    | 158 | 182 | 212 | 166 | 303 | 255 | 279 |
| REB1xSNT2    | 15  | 4   | 5   | 7   | 9   | 25  | 7   |
| REB1xSTB1    | 179 | 207 | 200 | 151 | 207 | 231 | 274 |
| REB1xSTB2    | 167 | 151 | 207 | 158 | 201 | 208 | 262 |
| REB1xSTB3    | 168 | 90  | 131 | 163 | 200 | 218 | 196 |
| REB1xSTB5    | 110 | 198 | 251 | 117 | 249 | 219 | 234 |
| REB1xSTP1    | 200 | 197 | 208 | 164 | 211 | 287 | 287 |
| REB1xSTP2    | 45  | 27  | 39  | 49  | 31  | 104 | 67  |
| REB1xSUM1    | 82  | 26  | 69  | 113 | 89  | 118 | 76  |
| REB1xSUT1    | 181 | 191 | 237 | 153 | 258 | 248 | 233 |
| REB1xSWI4    | 240 | 202 | 199 | 139 | 190 | 243 | 250 |
| REB1xSWI6    | 144 | 174 | 214 | 134 | 188 | 215 | 252 |
| REB1xTBF1    | 194 | 155 | 230 | 174 | 331 | 206 | 240 |
| REB1xTYE7    | 211 | 191 | 211 | 212 | 210 | 297 | 253 |
| REB1xUME6    | 95  | 13  | 58  | 106 | 85  | 148 | 108 |
| REB1xYDR026C | 131 | 113 | 84  | 111 | 152 | 146 | 123 |
| REB1xYER184C | 216 | 195 | 285 | 161 | 331 | 357 | 338 |
| REB1xYJL103C | 390 | 253 | 285 | 487 | 428 | 588 | 432 |



|              |      |      |     |      |      |      |      |     |
|--------------|------|------|-----|------|------|------|------|-----|
| REB1xYPL230W | 528  | 355  | 384 | 651  | 634  | 719  | 597  |     |
| REB1xYPR196W | 140  | 190  | 228 | 164  | 207  | 228  | 206  |     |
| REB1xYRM1    | 169  | 186  | 230 | 177  | 254  | 326  | 268  |     |
| REB1xYRR1    | 16   | 0    | 3   | 9    | 12   | 8    | 17   |     |
| REB1xZMS1    | 211  | 257  | 277 | 236  | 328  | 327  | 343  |     |
| RFX1xRSC3    | 3    | 0    | 3   | 2    | 0    | 9    | 5    |     |
| RGM1xRPH1    | 626  | 389  | 292 | 770  | 390  | 969  | 536  |     |
| RGM1xRSC3    | 717  | 879  | 764 | 740  | 764  | 946  | 747  |     |
| RGM1xSKN7    | 648  | 756  | 675 | 763  | 817  | 1081 | 762  |     |
| RGM1xSOK2    | 1188 | 729  | 752 | 671  | 670  | 1479 | 958  |     |
| RGM1xSTP1    | 660  | 632  | 530 | 758  | 569  | 951  | 694  |     |
| RGM1xSUT1    | 830  | 824  | 790 | 840  | 818  | 1182 | 820  |     |
| RGM1xTBF1    | 538  | 541  | 557 | 610  | 629  | 645  | 623  |     |
| RGM1xUGA3    | 266  | 124  | 118 | 374  | 187  | 458  | 175  |     |
| RGM1xUME6    | 280  | 61   | 115 | 325  | 178  | 409  | 274  |     |
| RGM1xYDR026C |      | 469  | 290 | 216  | 561  | 440  | 617  | 376 |
| RGM1xYER130C | 214  | 74   | 74  | 242  | 129  | 264  | 154  |     |
| RGM1xYER184C | 926  | 688  | 729 | 792  | 857  | 1233 | 907  |     |
| RGM1xYJL103C | 1519 | 857  | 680 | 2136 | 1090 | 1963 | 1070 |     |
| RGM1xYLL054C | 80   | 55   | 39  | 113  | 71   | 232  | 72   |     |
| RGM1xZMS1    | 916  | 1050 | 903 | 1124 | 930  | 1425 | 1158 |     |
| RGT1xRSC3    | 174  | 426  | 439 | 151  | 251  | 272  | 343  |     |
| RGT1xSKN7    | 188  | 381  | 370 | 189  | 313  | 267  | 345  |     |
| RGT1xSTB1    | 181  | 407  | 340 | 183  | 250  | 224  | 310  |     |
| RGT1xSTB3    | 158  | 168  | 198 | 187  | 215  | 191  | 205  |     |
| RGT1xSTP1    | 193  | 422  | 299 | 192  | 238  | 255  | 304  |     |
| RGT1xSUT1    | 282  | 473  | 410 | 254  | 318  | 283  | 364  |     |
| RGT1xSUT2    | 54   | 67   | 54  | 62   | 74   | 64   | 60   |     |
| RGT1xUGA3    | 105  | 82   | 67  | 104  | 68   | 146  | 66   |     |
| RGT1xUME6    | 78   | 42   | 47  | 95   | 68   | 113  | 85   |     |
| RGT1xYJL103C | 512  | 584  | 427 | 620  | 502  | 647  | 558  |     |
| RGT1xYPR196W |      | 282  | 445 | 459  | 279  | 341  | 284  | 343 |
| RGT1xYRM1    | 225  | 450  | 422 | 198  | 317  | 398  | 402  |     |
| RGT1xZMS1    | 297  | 534  | 498 | 318  | 380  | 343  | 487  |     |
| RLM1xSPT15   | 185  | 118  | 268 | 177  | 184  | 231  | 183  |     |

|               |     |     |     |     |     |     |     |    |
|---------------|-----|-----|-----|-----|-----|-----|-----|----|
| RPH1xRSC3     | 181 | 313 | 169 | 228 | 174 | 377 | 272 |    |
| RPH1xSTP3     | 217 | 164 | 178 | 281 | 191 | 324 | 174 |    |
| RPH1xSUT1     | 228 | 223 | 202 | 224 | 190 | 443 | 270 |    |
| RPH1xYER130C  | 59  | 21  | 16  | 69  | 36  | 66  | 52  |    |
| RPH1xYER184C  | 259 | 198 | 195 | 188 | 185 | 427 | 302 |    |
| RPH1xYJL103C  | 463 | 229 | 188 | 536 | 242 | 641 | 341 |    |
| RPH1xYPL230W  | 626 | 389 | 292 | 770 | 390 | 969 | 536 |    |
| RPH1xZMS1     | 259 | 329 | 234 | 297 | 228 | 505 | 334 |    |
| RPN4xSUT1     | 107 | 151 | 116 | 135 | 124 | 165 | 138 |    |
| RPN4xUME6     | 71  | 12  | 27  | 82  | 38  | 106 | 58  |    |
| RPN4xYDR026C  | 83  | 78  | 33  | 101 | 92  | 107 | 67  |    |
| RPN4xZMS1     | 125 | 177 | 150 | 185 | 143 | 198 | 173 |    |
| RSC30xRSC3    | 32  | 54  | 19  | 31  | 37  | 218 | 41  |    |
| RSC30xSKN7    | 56  | 36  | 38  | 32  | 43  | 149 | 54  |    |
| RSC30xSTB2    | 19  | 22  | 13  | 20  | 11  | 41  | 26  |    |
| RSC30xSTP1    | 41  | 35  | 31  | 26  | 19  | 132 | 38  |    |
| RSC30xSTP2    | 8   | 9   | 5   | 13  | 2   | 62  | 13  |    |
| RSC30xSUT1    | 31  | 39  | 26  | 21  | 27  | 134 | 35  |    |
| RSC30xUGA3    | 18  | 4   | 5   | 12  | 10  | 46  | 5   |    |
| RSC30xUME6    | 28  | 0   | 12  | 23  | 7   | 33  | 8   |    |
| RSC30xYER051W |     | 15  | 4   | 5   | 6   | 12  | 13  | 5  |
| RSC30xYER184C |     | 67  | 29  | 33  | 30  | 32  | 108 | 37 |
| RSC30xYJL103C | 110 | 28  | 32  | 78  | 29  | 145 | 40  |    |
| RSC30xYRM1    | 50  | 8   | 38  | 31  | 14  | 74  | 43  |    |
| RSC30xZMS1    | 48  | 44  | 24  | 31  | 45  | 106 | 30  |    |
| RSC3xRTG3     | 180 | 377 | 483 | 167 | 244 | 257 | 363 |    |
| RSC3xSFP1     | 221 | 529 | 344 | 167 | 299 | 248 | 360 |    |
| RSC3xSKN7     | 251 | 602 | 630 | 257 | 507 | 615 | 477 |    |
| RSC3xSTB1     | 197 | 615 | 464 | 118 | 258 | 273 | 386 |    |
| RSC3xSTB2     | 179 | 422 | 351 | 197 | 196 | 236 | 293 |    |
| RSC3xSTB5     | 227 | 419 | 472 | 125 | 326 | 265 | 336 |    |
| RSC3xSTP1     | 266 | 677 | 454 | 195 | 336 | 522 | 532 |    |
| RSC3xSTP2     | 79  | 149 | 70  | 71  | 50  | 212 | 163 |    |
| RSC3xSUT1     | 206 | 771 | 600 | 206 | 370 | 553 | 535 |    |
| RSC3xSUT2     | 65  | 94  | 74  | 68  | 127 | 52  | 59  |    |

|              |     |     |     |     |     |     |     |
|--------------|-----|-----|-----|-----|-----|-----|-----|
| RSC3xSWI4    | 271 | 552 | 473 | 141 | 229 | 250 | 343 |
| RSC3xSWI5    | 405 | 652 | 521 | 334 | 441 | 693 | 505 |
| RSC3xSWI6    | 171 | 540 | 432 | 150 | 208 | 250 | 352 |
| RSC3xTHI2    | 2   | 6   | 10  | 0   | 2   | 0   | 11  |
| RSC3xUGA3    | 95  | 116 | 105 | 101 | 106 | 216 | 111 |
| RSC3xUME6    | 177 | 39  | 112 | 136 | 88  | 201 | 186 |
| RSC3xXBP1    | 244 | 436 | 350 | 271 | 466 | 277 | 362 |
| RSC3xYBL054W | 245 | 546 | 391 | 167 | 330 | 304 | 385 |
| RSC3xYDR026C | 162 | 203 | 152 | 147 | 187 | 262 | 132 |
| RSC3xYER051W | 70  | 86  | 92  | 61  | 84  | 60  | 63  |
| RSC3xYER184C | 354 | 607 | 579 | 221 | 416 | 594 | 524 |
| RSC3xYJL103C | 622 | 661 | 528 | 647 | 522 | 868 | 651 |
| RSC3xYLL054C | 11  | 61  | 28  | 28  | 53  | 197 | 41  |
| RSC3xYPL230W | 717 | 879 | 764 | 740 | 764 | 946 | 747 |
| RSC3xYPR196W | 173 | 324 | 371 | 155 | 206 | 231 | 338 |
| RSC3xYRM1    | 210 | 336 | 442 | 188 | 263 | 386 | 412 |
| RSC3xZMS1    | 286 | 790 | 553 | 267 | 465 | 428 | 505 |
| RTG3xSKN7    | 180 | 390 | 433 | 186 | 267 | 309 | 320 |
| RTG3xSTB1    | 186 | 360 | 405 | 168 | 248 | 258 | 365 |
| RTG3xSTB5    | 242 | 360 | 380 | 150 | 225 | 214 | 303 |
| RTG3xSUM1    | 80  | 91  | 98  | 97  | 105 | 113 | 87  |
| RTG3xSUT1    | 178 | 372 | 396 | 202 | 249 | 284 | 344 |
| RTG3xSWI4    | 230 | 349 | 399 | 166 | 225 | 284 | 333 |
| RTG3xSWI6    | 162 | 363 | 372 | 174 | 184 | 239 | 291 |
| RTG3xTYE7    | 178 | 399 | 248 | 184 | 223 | 308 | 227 |
| SFP1xTYE7    | 192 | 428 | 167 | 161 | 173 | 251 | 220 |
| SIG1xXBP1    | 281 | 102 | 112 | 248 | 144 | 92  | 85  |
| SIP4xSKN7    | 23  | 3   | 6   | 31  | 11  | 12  | 7   |
| SIP4xSTP1    | 21  | 6   | 18  | 14  | 11  | 14  | 14  |
| SKN7xSOK2    | 389 | 543 | 488 | 236 | 330 | 600 | 459 |
| SKN7xSTB1    | 160 | 405 | 488 | 165 | 271 | 303 | 345 |
| SKN7xSTB4    | 167 | 167 | 149 | 143 | 184 | 236 | 171 |
| SKN7xSTB5    | 141 | 406 | 381 | 187 | 357 | 264 | 297 |
| SKN7xSTP1    | 196 | 484 | 347 | 215 | 378 | 417 | 383 |
| SKN7xSUT1    | 252 | 677 | 528 | 241 | 442 | 495 | 404 |

|                   |     |     |     |     |      |     |     |
|-------------------|-----|-----|-----|-----|------|-----|-----|
| SKN7xSUT2         | 61  | 82  | 54  | 70  | 100  | 60  | 59  |
| SKN7xSWI4         | 218 | 403 | 482 | 138 | 241  | 315 | 289 |
| SKN7xSWI5         | 364 | 594 | 536 | 442 | 447  | 637 | 494 |
| SKN7xSWI6         | 142 | 389 | 444 | 179 | 226  | 269 | 319 |
| SKN7xUGA3         | 119 | 82  | 94  | 110 | 113  | 223 | 110 |
| SKN7xUME6         | 90  | 31  | 53  | 98  | 89   | 165 | 134 |
| SKN7xYBL054W 221  | 546 | 426 | 190 | 455 | 376  | 398 |     |
| SKN7xYDR026C 137  | 197 | 133 | 161 | 232 | 271  | 189 |     |
| SKN7xYDR520C 16   | 28  | 14  | 19  | 38  | 33   | 23  |     |
| SKN7xYER184C 381  | 467 | 485 | 231 | 496 | 466  | 504 |     |
| SKN7xYJL103C 580  | 560 | 444 | 588 | 544 | 758  | 569 |     |
| SKN7xYLL054C 55   | 50  | 20  | 35  | 70  | 107  | 41  |     |
| SKN7xYPL230W 648  | 756 | 675 | 763 | 817 | 1081 | 762 |     |
| SKN7xYRM1 177     | 356 | 362 | 206 | 324 | 407  | 398 |     |
| SKN7xZMS1 276     | 617 | 465 | 286 | 453 | 552  | 504 |     |
| SKO1xSUM1 80      | 84  | 99  | 139 | 107 | 149  | 119 |     |
| SNF1xYBL054W 1    | 0   | 1   | 2   | 18  | 1    | 2   |     |
| SNT2xSTB2 17      | 4   | 7   | 7   | 12  | 15   | 4   |     |
| SNT2xSTB5 35      | 4   | 5   | 10  | 2   | 23   | 9   |     |
| SNT2xSTP3 17      | 4   | 2   | 22  | 6   | 17   | 5   |     |
| SNT2xYER184C 8    | 3   | 9   | 6   | 11  | 22   | 12  |     |
| SOK2xSUT1 402     | 552 | 500 | 230 | 290 | 540  | 474 |     |
| SOK2xYPL230W 1188 | 729 | 752 | 671 | 670 | 1479 | 958 |     |
| SOK2xZMS1 472     | 599 | 507 | 286 | 326 | 620  | 582 |     |
| SPT15xUPC2 313    | 550 | 547 | 292 | 250 | 303  | 418 |     |
| SPT23xSTB3 162    | 200 | 206 | 146 | 186 | 188  | 279 |     |
| SRD1xYER130C 14   | 6   | 4   | 19  | 12  | 10   | 13  |     |
| STB1xSTB2 170     | 377 | 271 | 143 | 238 | 241  | 370 |     |
| STB1xSTB3 175     | 161 | 156 | 138 | 211 | 230  | 217 |     |
| STB1xSTP1 186     | 429 | 286 | 167 | 201 | 270  | 346 |     |
| STB1xSUT1 197     | 470 | 474 | 164 | 268 | 276  | 344 |     |
| STB1xSWI4 359     | 624 | 495 | 260 | 401 | 368  | 528 |     |
| STB1xSWI6 267     | 602 | 444 | 216 | 393 | 297  | 488 |     |
| STB1xUGA3 102     | 71  | 69  | 78  | 89  | 174  | 106 |     |
| STB1xxBP1 256     | 349 | 379 | 224 | 431 | 282  | 359 |     |

|              |     |     |     |     |     |     |     |
|--------------|-----|-----|-----|-----|-----|-----|-----|
| STB1xYDR026C | 150 | 191 | 140 | 137 | 144 | 178 | 165 |
| STB1xYER184C | 247 | 408 | 476 | 150 | 301 | 364 | 443 |
| STB1xYLL054C | 16  | 28  | 25  | 21  | 23  | 79  | 24  |
| STB1xYRM1    | 184 | 384 | 366 | 186 | 242 | 354 | 375 |
| STB2xSTB3    | 170 | 131 | 178 | 153 | 221 | 219 | 185 |
| STB2xSTP1    | 189 | 328 | 282 | 158 | 223 | 241 | 343 |
| STB2xSTP2    | 46  | 52  | 54  | 53  | 25  | 89  | 98  |
| STB2xSUM1    | 84  | 72  | 81  | 112 | 89  | 90  | 87  |
| STB2xSUT1    | 148 | 329 | 351 | 137 | 277 | 211 | 341 |
| STB2xSWI4    | 233 | 372 | 281 | 137 | 222 | 277 | 343 |
| STB2xSWI6    | 176 | 327 | 317 | 159 | 278 | 267 | 320 |
| STB2xTBF1    | 197 | 290 | 316 | 170 | 329 | 194 | 279 |
| STB2xTYE7    | 206 | 304 | 234 | 202 | 217 | 269 | 282 |
| STB2xUME6    | 85  | 25  | 76  | 130 | 93  | 145 | 125 |
| STB2xYDR026C | 136 | 150 | 130 | 116 | 159 | 162 | 152 |
| STB2xYER184C | 227 | 342 | 415 | 170 | 343 | 363 | 422 |
| STB2xYJL103C | 402 | 472 | 385 | 513 | 438 | 594 | 509 |
| STB2xYRR1    | 9   | 3   | 4   | 12  | 11  | 11  | 16  |
| STB2xZMS1    | 202 | 507 | 366 | 225 | 345 | 286 | 364 |
| STB3xSWI4    | 223 | 155 | 158 | 156 | 196 | 271 | 193 |
| STB3xSWI6    | 145 | 171 | 147 | 128 | 212 | 172 | 181 |
| STB3xXBP1    | 208 | 199 | 210 | 213 | 242 | 256 | 237 |
| STB3xYBL054W | 260 | 290 | 298 | 164 | 407 | 320 | 358 |
| STB3xYDR026C | 132 | 70  | 49  | 110 | 138 | 152 | 110 |
| STB3xYRR1    | 8   | 2   | 4   | 9   | 12  | 12  | 10  |
| STB4xSTB5    | 136 | 174 | 134 | 153 | 138 | 194 | 186 |
| STB4xSUT1    | 151 | 239 | 160 | 166 | 169 | 207 | 199 |
| STB4xSUT2    | 36  | 22  | 15  | 49  | 68  | 43  | 39  |
| STB4xUGA3    | 71  | 30  | 33  | 80  | 38  | 94  | 53  |
| STB4xYER184C | 180 | 186 | 171 | 160 | 235 | 310 | 216 |
| STB4xYJL103C | 330 | 231 | 172 | 436 | 297 | 519 | 265 |
| STB5xSTP2    | 72  | 60  | 56  | 77  | 36  | 90  | 67  |
| STB5xSUT1    | 147 | 422 | 471 | 144 | 329 | 257 | 293 |
| STB5xSUT2    | 45  | 87  | 58  | 67  | 96  | 74  | 65  |
| STB5xYDR520C | 16  | 20  | 19  | 26  | 24  | 27  | 19  |

|              |     |     |     |     |     |     |     |
|--------------|-----|-----|-----|-----|-----|-----|-----|
| STB5xYER184C | 248 | 415 | 475 | 201 | 369 | 349 | 372 |
| STB5xYJL103C | 453 | 555 | 447 | 535 | 432 | 610 | 476 |
| STP1xSTP2    | 76  | 108 | 63  | 90  | 61  | 175 | 110 |
| STP1xSTP3    | 283 | 369 | 332 | 292 | 307 | 395 | 309 |
| STP1xSUM1    | 95  | 52  | 54  | 85  | 68  | 97  | 92  |
| STP1xSUT1    | 233 | 601 | 462 | 285 | 325 | 529 | 407 |
| STP1xSWI4    | 245 | 415 | 296 | 156 | 189 | 319 | 296 |
| STP1xSWI6    | 156 | 380 | 286 | 162 | 206 | 266 | 287 |
| STP1xTHI2    | 10  | 3   | 6   | 3   | 1   | 0   | 6   |
| STP1xTYE7    | 180 | 463 | 172 | 146 | 249 | 276 | 258 |
| STP1xUGA3    | 92  | 86  | 55  | 95  | 70  | 218 | 81  |
| STP1xUME6    | 110 | 46  | 81  | 137 | 71  | 238 | 145 |
| STP1xYDR026C | 160 | 206 | 123 | 176 | 201 | 251 | 179 |
| STP1xYER184C | 280 | 493 | 417 | 219 | 357 | 465 | 427 |
| STP1xYJL103C | 481 | 578 | 354 | 628 | 407 | 698 | 541 |
| STP1xYLL054C | 22  | 42  | 17  | 31  | 37  | 167 | 35  |
| STP1xYPL230W | 660 | 632 | 530 | 758 | 569 | 951 | 694 |
| STP1xZMS1    | 266 | 638 | 425 | 353 | 342 | 496 | 487 |
| STP2xSUM1    | 28  | 7   | 9   | 29  | 14  | 48  | 26  |
| STP2xSUT1    | 78  | 123 | 79  | 106 | 63  | 175 | 134 |
| STP2xYER184C | 84  | 94  | 84  | 73  | 53  | 182 | 119 |
| STP2xYJL103C | 153 | 107 | 73  | 225 | 49  | 288 | 137 |
| STP2xYLL054C | 4   | 15  | 7   | 18  | 6   | 60  | 19  |
| STP2xZMS1    | 94  | 128 | 82  | 136 | 48  | 165 | 150 |
| STP3xSUT1    | 283 | 423 | 447 | 304 | 317 | 381 | 292 |
| SUM1xSWI6    | 84  | 73  | 62  | 70  | 120 | 81  | 57  |
| SUT1xSUT2    | 71  | 78  | 68  | 64  | 103 | 75  | 55  |
| SUT1xSWI4    | 244 | 444 | 495 | 154 | 237 | 302 | 295 |
| SUT1xSWI6    | 183 | 423 | 460 | 176 | 217 | 237 | 328 |
| SUT1xTYE7    | 215 | 418 | 231 | 182 | 284 | 320 | 304 |
| SUT1xUGA3    | 125 | 95  | 107 | 97  | 98  | 215 | 102 |
| SUT1xUME6    | 140 | 30  | 96  | 148 | 83  | 241 | 186 |
| SUT1xYDR026C | 149 | 168 | 164 | 152 | 237 | 248 | 162 |
| SUT1xYDR520C | 31  | 22  | 36  | 16  | 27  | 35  | 38  |
| SUT1xYER130C | 70  | 59  | 67  | 63  | 72  | 94  | 61  |

|              |     |     |     |     |     |      |     |
|--------------|-----|-----|-----|-----|-----|------|-----|
| SUT1xYER184C | 444 | 542 | 556 | 237 | 475 | 510  | 507 |
| SUT1xYJL103C | 635 | 623 | 514 | 644 | 540 | 764  | 598 |
| SUT1xYLL054C | 51  | 60  | 37  | 50  | 50  | 171  | 44  |
| SUT1xYPL230W | 830 | 824 | 790 | 840 | 818 | 1182 | 820 |
| SUT1xYPR196W | 238 | 449 | 427 | 200 | 257 | 297  | 323 |
| SUT1xYRM1    | 216 | 426 | 441 | 208 | 294 | 409  | 421 |
| SUT1xZMS1    | 353 | 745 | 645 | 355 | 478 | 577  | 568 |
| SUT2xXBP1    | 75  | 77  | 69  | 96  | 131 | 46   | 64  |
| SUT2xYER184C | 104 | 103 | 69  | 78  | 96  | 86   | 85  |
| SUT2xYJL103C | 175 | 127 | 56  | 208 | 131 | 151  | 117 |
| SUT2xZMS1    | 78  | 98  | 96  | 111 | 161 | 85   | 84  |
| SWI4xSWI6    | 353 | 586 | 462 | 257 | 372 | 355  | 449 |
| SWI4xUGA3    | 126 | 66  | 71  | 63  | 85  | 163  | 93  |
| SWI4xXBP1    | 339 | 352 | 383 | 245 | 407 | 296  | 332 |
| SWI4xYDR026C | 204 | 182 | 139 | 124 | 132 | 185  | 148 |
| SWI4xYLL054C | 28  | 24  | 28  | 26  | 19  | 75   | 21  |
| SWI5xYLL054C | 62  | 36  | 39  | 71  | 52  | 137  | 65  |
| SWI6xUGA3    | 99  | 61  | 57  | 62  | 81  | 135  | 71  |
| SWI6xYDR026C | 150 | 182 | 130 | 136 | 133 | 185  | 135 |
| TBF1xTYE7    | 179 | 328 | 202 | 133 | 193 | 253  | 190 |
| TBF1xYDR026C | 144 | 129 | 105 | 128 | 248 | 155  | 135 |
| TBF1xYPL230W | 538 | 541 | 557 | 610 | 629 | 645  | 623 |
| TBF1xYRR1    | 17  | 1   | 7   | 9   | 24  | 9    | 15  |
| TEC1xUPC2    | 369 | 526 | 434 | 323 | 266 | 300  | 508 |
| TEC1xYER130C | 61  | 56  | 55  | 52  | 58  | 61   | 39  |
| TYE7xUGA3    | 39  | 87  | 25  | 67  | 57  | 163  | 59  |
| TYE7xUME6    | 125 | 44  | 68  | 109 | 79  | 182  | 124 |
| TYE7xYDR026C | 172 | 152 | 115 | 154 | 166 | 255  | 171 |
| TYE7xYDR520C | 25  | 40  | 6   | 24  | 7   | 15   | 22  |
| TYE7xYER184C | 246 | 387 | 247 | 186 | 304 | 411  | 361 |
| TYE7xYJL103C | 415 | 558 | 192 | 517 | 358 | 609  | 399 |
| TYE7xYLL054C | 21  | 29  | 5   | 43  | 49  | 93   | 27  |
| TYE7xYRM1    | 188 | 438 | 209 | 215 | 231 | 316  | 269 |
| TYE7xYRR1    | 11  | 5   | 9   | 7   | 6   | 22   | 15  |
| UGA3xYER184C | 144 | 88  | 89  | 124 | 70  | 192  | 129 |

|                  |      |     |     |      |      |      |      |
|------------------|------|-----|-----|------|------|------|------|
| UGA3xYJL103C 223 | 123  | 71  | 290 | 104  | 335  | 151  |      |
| UGA3xYLL054C 16  | 3    | 2   | 9   | 21   | 75   | 15   |      |
| UGA3xYPL230W     | 266  | 124 | 118 | 374  | 187  | 458  | 175  |
| UME6xYDR026C     | 69   | 20  | 30  | 92   | 44   | 110  | 64   |
| UME6xYER184C140  | 41   | 82  | 91  | 102  | 195  | 139  |      |
| UME6xYLL054C 20  | 4    | 9   | 31  | 10   | 58   | 10   |      |
| UME6xYPL230W     | 280  | 61  | 115 | 325  | 178  | 409  | 274  |
| UME6xYPR196W     | 73   | 24  | 62  | 79   | 68   | 93   | 98   |
| UME6xZMS1 132    | 64   | 99  | 164 | 90   | 233  | 207  |      |
| USV1xZMS1 18     | 12   | 24  | 22  | 11   | 26   | 32   |      |
| XBP1xYBL054W 412 | 516  | 350 | 191 | 416  | 356  | 373  |      |
| YAP3xYAP7 194    | 34   | 87  | 215 | 118  | 117  | 111  |      |
| YBL054WxYLL054C  | 12   | 30  | 21  | 17   | 19   | 123  | 31   |
| YDR026CxYER130C  | 43   | 23  | 17  | 48   | 34   | 52   | 24   |
| YDR026CxYER184C  | 235  | 199 | 167 | 150  | 289  | 313  | 233  |
| YDR026CxYJL103C  | 384  | 244 | 187 | 437  | 330  | 474  | 270  |
| YDR026CxYLL054C  | 18   | 14  | 10  | 35   | 35   | 50   | 18   |
| YDR026CxYPL230W  | 469  | 290 | 216 | 561  | 440  | 617  | 376  |
| YDR026CxZMS1 182 | 225  | 170 | 194 | 240  | 273  | 229  |      |
| YDR520CxZMS1 28  | 29   | 26  | 42  | 34   | 33   | 44   |      |
| YER130CxYPL230W  | 214  | 74  | 74  | 242  | 129  | 264  | 154  |
| YER130CxZMS1 94  | 68   | 84  | 110 | 85   | 128  | 99   |      |
| YER184CxYJL103C  | 788  | 639 | 544 | 696  | 689  | 974  | 788  |
| YER184CxYLL054C  | 59   | 37  | 31  | 21   | 62   | 117  | 47   |
| YER184CxYPL230W  | 926  | 688 | 729 | 792  | 857  | 1233 | 907  |
| YER184CxYRM1 267 | 385  | 465 | 208 | 374  | 524  | 506  |      |
| YER184CxZMS1 441 | 579  | 567 | 317 | 448  | 574  | 629  |      |
| YJL103CxYLL054C  | 77   | 41  | 21  | 80   | 52   | 181  | 59   |
| YJL103CxYPL230W  | 1519 | 857 | 680 | 2136 | 1090 | 1963 | 1070 |
| YJL103CxYPR196W  | 493  | 522 | 404 | 522  | 468  | 605  | 504  |
| YJL103CxYRM1 432 | 514  | 461 | 586 | 471  | 846  | 623  |      |
| YJL103CxZMS1 683 | 684  | 503 | 828 | 638  | 888  | 766  |      |
| YKL222CxYRM1 17  | 10   | 10  | 13  | 9    | 23   | 9    |      |
| YLL054CxYPL230W  | 80   | 55  | 39  | 113  | 71   | 232  | 72   |
| YLL054CxZMS1 42  | 65   | 43  | 56  | 38   | 152  | 66   |      |



|              |     |      |     |      |     |      |      |
|--------------|-----|------|-----|------|-----|------|------|
| YPL230WxZMS1 | 916 | 1050 | 903 | 1124 | 930 | 1425 | 1158 |
| YPR196WxYRM1 | 198 | 404  | 399 | 207  | 318 | 356  | 389  |
| YRM1xZMS1    | 230 | 498  | 461 | 310  | 396 | 480  | 547  |
