# Supplementary material for: Combinatorial Cis-regulation in Saccharomyces Species
Source: Oxford University Press journal article supplement (doi:10.1534/g3.115.024331), 2016-01-26
Supplement: 024331_tables3.pdf [file 024331_tables3.pdf]

**Table S3.**

Figure 3 gene names (in order, top to bottom)

Top Panel

Ngr1 x Sut1 Combination Target Genes (UPPER)

YPR091C  
YEL063C  
YDR373W  
YDR372C  
YJR094W-A  
YKR027W  
YJL104W  
YMR158W-B  
YBR166C  
YKL138C-A  
YLR061W  
YPR007C  
tS (UGA) P  
YHR055C  
YPR092W  
YPR008W  
YMR160W  
YFL037W  
YPR072W  
snR51  
snR70  
YBR167C

Nrg1-only Target Genes (LOWER)

YOR074C  
YOR075W  
YBR008C  
YJR095W  
YOR073W-A  
RUF20  
YFL004W  
YPR190C  
YBR009C  
YEL003W  
YBR010W  
YBR058C-A  
YFL026W  
YFL027C  
YDR056C  
YDR057W  
YDR039C  
snR63  
YBR058C  
YPL189C-A  
YPL189W

YMR319C

Bottom Panel

Nrg1 x Sut1 Combination Target Genes (UPPER)

YPR007C  
YPR091C  
tS (UGA) P  
snR51  
YDR373W  
YDR372C  
snR70  
YFL037W  
YKL138C-A  
YLR061W  
YPR008W  
YMR158W-B  
YJL104W  
YKR027W  
YBR167C  
YPR092W  
YPR072W  
YMR160W  
YHR055C  
YEL063C  
YJR094W-A  
YBR166C

Sut1-only Target Genes (LOWER)

YOR216C  
YJL200C  
YJL144W  
YHL034C  
YPL056C  
YMR193W  
YPR156C  
YNL117W  
YGR270C-A  
YIR024C  
YER060W-A  
YCR088W  
YHL050W-A  
YAL069W  
YGR097W  
YGR129W  
YDR070C  
YKR090W  
YJL141C  
YFR040W  
YOR109W  
YHR007C-A
