# Supplementary material for: Combinatorial Cis-regulation in Saccharomyces Species
Source: Oxford University Press journal article supplement (doi:10.1534/g3.115.024331), 2016-01-26
Supplement: 024331_tables4.pdf [file 024331_tables4.pdf]

**Table S4.**

FIGURE 4 GENE NAMES (in order, top to bottom)

Top Panel

Gcn4 x Rtg3 Combination Target Genes (UPPER)

YNL142W  
YNL143C  
YDR051C  
YJL136C  
YJL135W  
YHR060W  
YGR161C  
YPL021W  
YNL187W  
YMR159C  
YMR160W  
YJR090C  
YMR158C-A  
YPL179W  
YPL127C  
YNL078W  
YMR075C-A  
YDL053C  
YJR094W-A  
YFL039C  
LSR1  
YIL117C  
YHR152W  
YHR151C  
YDL054C  
YBR008C  
YPL156C  
YJL134W  
YMR158W-B

Gcn4-only Target Genes (LOWER)

YDL170W  
YDL171C  
YPL273W  
YLL027W  
YGR193C  
YMR175W-A  
YNL228W  
YHR063C  
YOL058W  
YMR174C  
YNL174W

YOR282W  
YLR169W  
YHR098C  
YKR014C  
YPL260W  
YPR008W  
YPL250C  
YBL049W  
RPR1  
YDR363W  
YMR105C  
YPR184W  
YIL135C  
tR (UCU) B  
YDR135C  
YMR172C-A  
YJR151W-A  
YDR378C

Bottom Panel

Gcn4 x Rtg3 Combination Target Genes (UPPER)

YJR094W-A  
YJL134W  
LSR1  
YPL127C  
YMR075C-A  
YJR090C  
YMR158C-A  
YHR060W  
YPL021W  
YFL039C  
YDL053C  
YDL054C  
YHR152W  
YHR151C  
YPL179W  
YIL117C  
YJL136C  
YJL135W  
YPL156C  
YNL187W  
YDR051C  
YBR008C  
YNL142W  
YNL143C  
YNL078W  
YMR159C  
YMR160W  
YGR141C  
YMR158W-B

Rtg3-only Target Genes (LOWER)

YHR056W-A  
YDR366C  
YLR458W  
YML081W  
YEL009C-A  
YDR302W  
YDR070C  
YBL058W  
YMR253C  
YLP298C  
YHR050W-A  
YIL047C  
YPR046W  
tS (AGA) M  
YGR024C  
YPR194C  
YER065C  
YDR342C  
YIR029W  
YDR507C  
YMR097C  
YDR319C  
YLR033W  
YMR133W  
YKR098C  
YNL252C  
YNL112W  
YDR214W  
YHR039C
