# Supplementary material for: Combinatorial Cis-regulation in Saccharomyces Species
Source: Oxford University Press journal article supplement (doi:10.1534/g3.115.024331), 2016-01-26
Supplement: 024331_tables5.pdf [file 024331_tables5.pdf]

Table S5. 81 CRE pairs with significant ( $P < 0.05$ ) rewiring

| Pair       | P-value |
|------------|---------|
| ABF1xHAC1  | 0.0114  |
| ABF1xRPN4  | 0.0264  |
| ABF1xSTB1  | 0       |
| AFT2xCAT8  | 0.011   |
| AFT2xMIG1  | 0.0327  |
| AFT2xZMS1  | 0.0037  |
| ARG80xGCN4 | 0.0197  |
| CAT8xUME6  | 0.037   |
| CBF1xCRZ1  | 0.0013  |
| CBF1xPHD1  | 0       |
| CRZ1xSTP1  | 0.002   |
| CRZ1xSUT1  | 0.037   |
| CRZ1xTYE7  | 0.0112  |
| DAL80xGAT1 | 0.0001  |
| DAL80xGLN3 | 0.0036  |
| DAL80xGZF3 | 0.0009  |
| DAL82xPHD1 | 0.0015  |
| EDS1xHSF1  | 0.0137  |
| EDS1xMBP1  | 0.0016  |
| EDS1xPBF2  | 0.0109  |
| FKH1xSTB1  | 0.0036  |
| FKH1xSWI4  | 0.0011  |
| FKH1xSWI6  | 0.0013  |
| FKH2xSTB1  | 0.0111  |
| FKH2xSWI4  | 0       |
| FKH2xSWI6  | 0.0013  |
| GIS1xMIG3  | 0.0015  |
| GIS1xNRG1  | 0.0001  |
| GIS1xRDS2  | 0.0048  |
| GIS1xSTP1  | 0.0166  |
| GIS1xSUT1  | 0.0122  |
| HAC1xSWI6  | 0.0022  |
| HAP1xZMS1  | 0.0258  |
| HAP2xRSC3  | 0.013   |
| MBP1xREB1  | 0.0199  |
| MBP1xSTB1  | 0.0315  |
| MBP1xSWI6  | 0.0018  |
| MET32xPHO4 | 0.0093  |
| MIG1xPDR1  | 0.0001  |
| MIG1xRCS1  | 0.0004  |
| MIG1xRPH1  | 0.007   |
| MIG1xSTP1  | 0       |
| MIG1xSTP2  | 0       |
| MIG1xUME6  | 0.002   |
| MIG3xMSN4  | 0.0434  |
| MIG3xPDR1  | 0       |
| MIG3xRGM1  | 0.0011  |

|              |        |
|--------------|--------|
| MIG3xSTB5    | 0.0001 |
| MIG3xSTP1    | 0.0004 |
| MIG3xSTP2    | 0.0255 |
| MIG3xUME6    | 0.0196 |
| MIG3xYER130C | 0.0045 |
| MIG3xYPL230W | 0.002  |
| MIG3xZMS1    | 0.0014 |
| MSN2xYDR026C | 0.0197 |
| MSN2xYJL103C | 0.0161 |
| NRG1xRGM1    | 0      |
| NRG1xYPL230W | 0.0004 |
| NRG1xZMS1    | 0      |
| PBF1xSTB3    | 0.0012 |
| PHD1xPHO4    | 0      |
| PHD1xSUT1    | 0.0016 |
| PHD1xYER184C | 0.0022 |
| PHD1xYJL103C | 0.0026 |
| RDS2xRGM1    | 0.0047 |
| RDS2xYPL230W | 0.0044 |
| REB1xSTB3    | 0.0024 |
| RGM1xSTP1    | 0.0181 |
| RGM1xSUT1    | 0.0153 |
| RPH1xZMS1    | 0.0002 |
| RPN4xYDR026C | 0.0303 |
| STB2xSWI6    | 0.001  |
| STB3xYBL054W | 0.0003 |
| STP1xYER184C | 0.0045 |
| STP1xYJL103C | 0.0107 |
| STP1xYPL230W | 0.0161 |
| SUT1xUME6    | 0.0012 |
| SUT1xYER184C | 0.0004 |
| SUT1xYJL103C | 0.0001 |
| SUT1xYPL230W | 0.0121 |
| SWI4xSWI6    | 0.0017 |
