# Supplementary material for: Combinatorial Cis-regulation in Saccharomyces Species
Source: Oxford University Press journal article supplement (doi:10.1534/g3.115.024331), 2016-01-26
Supplement: 024331_tables6.pdf [file 024331_tables6.pdf]

Table S6: GO pathway enrichment of significantly rewired CRE combinations (p<0.01)

| CRE Pair       | <i>S. cerevisiae</i> Pathway                         | Conserved Pathway                                         | <i>S. bayanus</i> Pathway                       |
|----------------|------------------------------------------------------|-----------------------------------------------------------|-------------------------------------------------|
| ABF1x<br>HAC1  | poly(A)+ mRNA export from nucleus                    | protein O-linked glycosylation                            | isoprenoid biosynthetic process                 |
| ABF1x<br>RPN4  |                                                      | proteasomal ubiquitin-dependent protein catabolic process | chromatin silencing                             |
| ABF1x<br>STB1  |                                                      | spindle pole body separation                              | mitotic spindle organization in nucleus         |
| AFT2x<br>CAT8  | nitrogen catabolite activation of transcription      |                                                           | activation of Rab GTPase activity               |
| AFT2x<br>MIG1  | histone demethylation                                | oxidation-reduction process                               | positive regulation of translational elongation |
| AFT2x<br>ZMS1  | histone demethylation                                | positive regulation of translational elongation           | leukotriene biosynthetic process                |
| ARG80x<br>GCN4 | negative regulation of actin filament polymerization | arginine biosynthetic process                             | lysine biosynthetic process                     |
| CAT8x<br>UME6  | phenylalanyl-tRNA aminoacylation                     | ATP synthesis coupled proton transport                    | regulation of ergosterol biosynthetic process   |
| CBF1x<br>CRZ1  | cysteine biosynthetic process via cystathionine      | glutathione biosynthetic process                          | ammonium transport                              |
| CBF1x<br>PHD1  | regulation of nitrogen utilization                   | ER-associated protein catabolic process                   | positive regulation of translational elongation |
| CRZ1x<br>STP1  | thiamine transport                                   |                                                           | uridine transport                               |
| CRZ1x<br>SUT1  | nitrogen catabolite activation of transcription      | tricarboxylic acid cycle                                  | cellular response to hypoxia                    |
| CRZ1x<br>TYE7  | cysteine biosynthetic process via cystathionine      |                                                           | telomere maintenance via telomerase             |
| DAL80xG<br>AT1 | gamma-aminobutyric acid transport                    | nitrogen catabolite repression of transcription           | leucine biosynthetic process                    |
| DAL80xG<br>LN3 | gamma-aminobutyric acid transport                    | nitrogen catabolite repression of transcription           | leucine biosynthetic process                    |
| DAL80xG<br>ZF3 | gamma-aminobutyric acid transport                    | nitrogen catabolite repression of transcription           | adenine catabolic process                       |
| DAL82xP<br>HD1 | rRNA pseudouridine synthesis                         |                                                           | lagging strand elongation                       |
| EDS1x<br>MBP1  | positive regulation of histone acetylation           | tRNA-type intron splice site recognition and cleavage     | glycolysis                                      |
| EDS1x<br>PBF2  | box H/ACA snoRNP assembly                            | ribosomal large subunit biogenesis                        | rRNA processing                                 |
| FKH1x<br>STB1  | premeiotic DNA replication                           |                                                           | cellular response to heat                       |
| FKH1x<br>SWI4  | premeiotic DNA replication                           | mitotic chromosome condensation                           | telomere capping                                |
| FKH1x<br>SWI6  | premeiotic DNA replication                           | mitotic chromosome condensation                           | telomere capping                                |

|                      |                                                             |                                                                                         |                                                                           |
|----------------------|-------------------------------------------------------------|-----------------------------------------------------------------------------------------|---------------------------------------------------------------------------|
| FKH2x<br>STB1        | premeiotic DNA replication                                  | mitotic chromosome condensation                                                         | telomere capping                                                          |
| FKH2x<br>SWI4        | premeiotic DNA replication                                  | mitotic chromosome condensation                                                         | telomere capping                                                          |
| FKH2x<br>SWI6        | premeiotic DNA replication                                  | mitotic chromosome condensation                                                         | telomere capping                                                          |
| GIS1x<br>MIG3        | protein monoubiquitination                                  | glycogen biosynthetic process                                                           | energy reserve metabolic process                                          |
| GIS1x<br>RDS2        | regulation of translational fidelity                        |                                                                                         | negative regulation of sphingolipid biosynthetic process                  |
| GIS1x<br>STP1        | uridine transport                                           | TOR signaling cascade                                                                   | regulation of fungal-type cell wall 1,3-alpha-glucan biosynthetic process |
| GIS1x<br>SUT1        | uridine transport                                           | glycogen biosynthetic process                                                           | thiamine transport                                                        |
| HAC1x<br>SWI6        | proline biosynthetic process                                | dolichol-linked oligosaccharide biosynthetic process                                    | protein import into peroxisome matrix, receptor recycling                 |
| HAP2x<br>RSC3        | mitochondrial magnesium ion transport                       | heme transport                                                                          | uridine transport                                                         |
| MBP1x<br>REB1        | tryptophan biosynthetic process                             | chitin biosynthetic process                                                             | nucleotide-sugar transport                                                |
| MBP1x<br>STB1        | regulation of establishment or maintenance of cell polarity | negative regulation of ubiquitin-protein ligase activity involved in mitotic cell cycle | DNA repair                                                                |
| MBP1x<br>SWI6        | post-Golgi vesicle-mediated transport                       | negative regulation of ubiquitin-protein ligase activity involved in mitotic cell cycle | GDP-mannose biosynthetic process                                          |
| MET32xP<br>HO4       | threonine biosynthetic process                              | glutathione biosynthetic process                                                        | drug transmembrane transport                                              |
| MIG1x<br>PDR1        | disaccharide catabolic process                              | sporulation resulting in formation of a cellular spore                                  | glycolysis                                                                |
| MIG1x<br>RCS1        | histone demethylation                                       | nucleotide-excision repair, DNA incision, 3'-to lesion                                  |                                                                           |
| MIG1x<br>STP1        | cellular respiration                                        | acetyl-CoA catabolic process                                                            |                                                                           |
| MIG1x<br>STP2        | cellular respiration                                        |                                                                                         | inositol biosynthetic process                                             |
| MIG1x<br>UME6        | vacuole inheritance                                         | acetyl-CoA catabolic process                                                            | hydrogen peroxide catabolic process                                       |
| MIG3x<br>MSN4        | UDP-glucose metabolic process                               | glycogen biosynthetic process                                                           | energy reserve metabolic process                                          |
| MIG3x<br>RGM1        | protein monoubiquitination                                  | glycogen biosynthetic process                                                           | energy reserve metabolic process                                          |
| MIG3x<br>STB5        | glycosphingolipid biosynthetic process                      |                                                                                         | activation of Rab GTPase activity                                         |
| MIG3x<br>STP1        | cellular respiration                                        | acetyl-CoA catabolic process                                                            |                                                                           |
| MIG3x<br>STP2        | cellular respiration                                        |                                                                                         | inositol biosynthetic process                                             |
| MIG3x<br>YPL230<br>W | protein monoubiquitination                                  | glycogen biosynthetic process                                                           | energy reserve metabolic process                                          |

|                      |                                                             |                                                                                         |                                                                                          |
|----------------------|-------------------------------------------------------------|-----------------------------------------------------------------------------------------|------------------------------------------------------------------------------------------|
| MIG3x<br>ZMS1        | protein monoubiquitination                                  | glycogen biosynthetic process                                                           |                                                                                          |
| MSN2x<br>YDR026C     | oxidation-reduction process                                 | early endosome to Golgi transport                                                       | cell shape checkpoint                                                                    |
| MSN2x<br>YJL103C     | proteasome regulatory particle assembly                     | tricarboxylic acid cycle                                                                | phosphatidylinositol biosynthetic process                                                |
| PHD1x<br>PHO4        | phosphate transport                                         | tricarboxylic acid cycle                                                                | positive regulation of translational elongation                                          |
| PHD1x<br>SUT1        | diadenosine polyphosphate catabolic process                 | mitochondrial electron transport, ubiquinol to cytochrome c                             | mitochondrial fusion                                                                     |
| PHD1x<br>YER184C     | fatty acid oxidation                                        |                                                                                         | glycogen biosynthetic process                                                            |
| PHD1x<br>YJL103C     | fatty acid oxidation                                        |                                                                                         | ammonium transport                                                                       |
| RDS2x<br>YPL230<br>W | regulation of translational fidelity                        |                                                                                         | negative regulation of sphingolipid biosynthetic process                                 |
| REB1x<br>STB3        | translational termination                                   | regulation of translational initiation                                                  | rRNA processing                                                                          |
| RGM1x<br>STP1        | uridine transport                                           | TOR signaling cascade                                                                   | regulation of fungal-type cell wall 1,3-alpha-glucan biosynthetic process                |
| RGM1x<br>SUT1        | uridine transport                                           | glycogen biosynthetic process                                                           | thiamine transport                                                                       |
| RPH1x<br>ZMS1        | pentose-phosphate shunt, oxidative branch                   |                                                                                         | proteasome regulatory particle assembly                                                  |
| RPN4x<br>YDR026C     | ATP synthesis coupled proton transport                      |                                                                                         | negative regulation of transcription from RNA polymerase II promoter in response to iron |
| STB2x<br>SWI6        | septin checkpoint                                           | DNA replication                                                                         | dolichol-linked oligosaccharide biosynthetic process                                     |
| STP1x<br>YER184C     | hydrogen peroxide catabolic process                         | cellular respiration                                                                    | ATP-dependent chromatin remodeling                                                       |
| STP1x<br>YJL103C     | hydrogen peroxide catabolic process                         | cellular respiration                                                                    | leucine biosynthetic process                                                             |
| STP1x<br>YPL230<br>W | uridine transport                                           | TOR signaling cascade                                                                   | regulation of fungal-type cell wall 1,3-alpha-glucan biosynthetic process                |
| SUT1x<br>UME6        | vacuole inheritance                                         | ATP synthesis coupled proton transport                                                  | phosphate transport                                                                      |
| SUT1xYE<br>R184C     | positive regulation of cell cycle                           | tricarboxylic acid cycle                                                                | plasmid maintenance                                                                      |
| SUT1xYJ<br>L103C     | positive regulation of cell cycle                           | tricarboxylic acid cycle                                                                |                                                                                          |
| SUT1x<br>YPL230<br>W | uridine transport                                           | glycogen biosynthetic process                                                           | thiamine transport                                                                       |
| SWI4x<br>SWI6        | regulation of establishment or maintenance of cell polarity | negative regulation of ubiquitin-protein ligase activity involved in mitotic cell cycle |                                                                                          |
