# Supplementary material for: Combinatorial Cis-regulation in Saccharomyces Species
Source: G3 (Bethesda). 2016 Jan 12;6(3):653–67. doi: 10.1534/g3.115.024331 (PMC4777128; doi:10.1534/g3.115.024331)
Supplement: Supporting Information [file supp_g3.115.024331_TableS1.zip › TableS1.xlsx]

## Sheet: Sheet1
Supplemental Table S1. CRE combinations and supporting experimental evidence. Literature reference provided for datasets that indicate significant interaction between CREs (p-value <0.01). ‘Ref’ column provides reference for known interactions mentioned in the main text.
Pair	ChIP	Path	Expression	Orient	Ref
ABF1xCBF1	(27) (26)	-35	(31) (32)
ABF1xUME6	-27	-34	-32
AFT2xRAP1	-27	(34) (35)	-29
AFT2xRCS1	-27	(34) (35)	(31) (32)	-29
AFT2xSFP1	-27	(34) (35)	(29) (30)	-30
ARG80xBAS1	(27) (26)	(34) (35)	(29) (30) (31) (32)
ARG80xGCN4	(27) (26)	(34) (35)	(29) (30) (31)		-49
ARG80xSUT1	-27	(34) (35)	(29) (31) (32)
ARG81xBAS1	(27) (26)	-34	(30) (31)
ARG81xGCN4	(27) (26)	-34	-29	-29
BAS1xGCN4	(27) (26) (28)	(34) (35)	(29) (32)		-50
BAS1xRTG3	(27) (26)	(34) (35)	(29) (31) (32)
CAD1xYAP7	-27	-34	-30
CBF1xGCN4	-27	(34) (35)	(29) (30) (31) (32)
CBF1xINO2	(27) (26)	-34	-31	-30
CBF1xINO4	(27) (26)	(34) (35)	-31
CBF1xMET32	-27	(34) (35)	(29) (30) (31)		-58
CBF1xMET4	(27) (26)	(34) (35)	(29) (30) (31)
CIN5xMIG3	-27	-35	(30) (31)
CUP9xRAP1	(27) (26)	-35	-32
DAL82xUME6	-27	-34	-29
DIG1xSTE12	(27) (26) (28)	-34	(29) (31)		-44
EDS1xHSF1	-27	-34	-31	-29
FHL1xRAP1	(27) (26) (28)	(34) (35)	(29) (30)		-42
FHL1xRPH1	(27) (26) (28)	-35	-29
FHL1xSFP1	(27) (26) (28)	(34) (35)	(29) (30) (31)	(30) (29)	-43
FKH1xFKH2	(27) (26) (28)	-34	-32
FKH1xMBP1	(27) (26)	-34	(29) (30) (31) (32)		-48
FKH1xMCM1	(27) (26)	-35	-30		-56
FKH1xSWI6	(27) (26)	-34	(29) (30) (31)	-29	-47
FKH2xMBP1	(27) (26)	(34) (35)	(29) (30) (31)
FKH2xMCM1	(27) (26)	-35	-30		-56
FKH2xSTB1	(27) (26)	-34	(29) (30) (31)	(30) (29)
FKH2xSWI6	(27) (26)	-34	(29) (30) (31)	-29
FZF1xSPT23	-27	-34	(29) (32)	(30) (29)
GAL4xSTP1	-28	(34) (35)	-32
GCN4xLEU3	(27) (26) (28)	(34) (35)	(30) (31) (32)
GCN4xRTG3	(27) (26)	(34) (35)	(29) (32)	(30) (29)
GCR1xGCR2	(27) (26)	-34	-32		-60
GCR1xRAP1	(27) (26) (28)	(34) (35)	(30) (31) (32)		-60
GCR2xTHI2	(27) (26)	(34) (35)	(31) (32)
GLN3xGZF3	-27	-35	-32
HAP1xPDR1	-27	-35	(29) (31)
HAP1xSUT1	-27	-34	-29
HAP3xHAP4	(27) (26)	(34) (35)	(30) (31)
HAP3xUGA3	-26	-35	-32
HAP4xHAP5	(27) (26)	(34) (35)	(30) (31)
HMS1xTYE7	-27	-34	(31) (32)
HSF1xXBP1	-27	-34	(29) (30) (31)
INO2xINO4	(27) (26) (28)	(34) (35)	-32		-57
LEU3xSKN7	(27) (28)	-35	-32
LEU3xUME6	-28	(34) (35)	(31) (32)
MBP1xNDD1	(27) (26)	-35	(29) (31)
MBP1xSTB1	(27) (26)	(34) (35)	(29) (30) (31) (32)	-30	-40
MBP1xSWI4	(27) (26)	(34) (35)	(29) (30) (31) (32)	-30	-39
MBP1xSWI6	(27) (26)	(34) (35)	(29) (30) (31) (32)		-39
MCM1xSTE12	(27) (26)	-34	(29) (30) (31)
MCM1xSWI4	(27) (26)	-34	(29) (30) (31) (32)
MCM1xSWI6	(27) (26)	(34) (35)	(29) (30) (31) (32)
MET32xMET4	-27	-35	(29) (30) (31)
MET32xTYE7	-27	(34) (35)	(29) (30) (31)	-30
MIG1xMIG3	-27	(34) (35)	(29) (30) (31)	-30
MIG1xPHD1	(27) (26)	(34) (35)	(30) (31)
MIG1xRGT1	(27) (26)	-35	-31	-30	-51
MIG1xSKN7	(27) (26)	-35	(30) (31)
MIG1xSOK2	(27) (26)	-35	(31) (32)
MIG1xSUT1	-27	(34) (35)	(29) (30) (31) (32)	-30
MIG2xMOT3	-27	-35	-31
MIG2xOAF1	-27	-35	(30) (31)
MIG3xMSN4	-27	(34) (35)	(29) (30) (31)	(30) (29)
MIG3xNRG1	-27	(34) (35)	(30) (31)	-30
MIG3xPHD1	-27	-35	(29) (31)
MIG3xRGT1	-27	-35	(29) (30) (31)
MIG3xSTP1	-27	(34) (35)	(29) (30) (31)	-29
MIG3xSUT1	-27	(34) (35)	(29) (30) (31)	-30
MIG3xYPR196W	-27	-35	(29) (30) (31)
MOT3xSKN7	-27	-34	(29) (32)
MSN2xPHD1	-26	-34	(29) (30) (31)
MSN2xSKN7	(27) (28)	-35	(30) (31)
MSN2xZMS1	-28	-35	(29) (30) (31) (32)	(30) (29)
MSN4xSKN7	-27	-35	(30) (31) (32)
MSN4xXBP1	-27	-35	(29) (30) (31) (32)
NDD1xSTB1	(27) (26)	-34	-29
NDD1xSWI6	(27) (26)	-34	(29) (31)
NHP6AxPHO2	-28	(34) (35)	-29
NRG1xPDR1	(27) (26)	-35	-30
NRG1xRIM101	(27) (26)	-35	(30) (31) (32)	-29
OAF1xPDR3	-27	-35	(30) (31) (32)		-52
PDR1xZMS1	(27) (26)	-34	(29) (30) (31)
PDR3xSTP1	-27	-34	(29) (30) (31)
PHD1xSUT1	-27	(34) (35)	(31) (32)	-30
RAP1xSFP1	(27) (26) (28)	(34) (35)	(29) (30) (31) (32)
RAP1xSTP1	-28	-35	-32
RCS1xSFP1	(27) (26)	(34) (35)	(29) (32)
RDS1xSTP1	-27	-35	(30) (31)
RGM1xRPH1	(27) (26)	-35	(29) (30) (31) (32)	-30
RGT1xSUT1	-27	-35	(30) (31) (32)	-29
RPH1xZMS1	-28	(34) (35)	(29) (30) (31) (32)	-30
RTG3xSTB5	-27	-34	(29) (32)	(30) (29)
SKN7xUGA3	-28	-35	(29) (31)
SKN7xZMS1	-28	-35	-31
SNF1xYBL054W	-27	-35	-32
STB1xSWI4	(27) (26)	-34	(29) (30) (32)	-29	-41
STB1xSWI6	(27) (26)	(34) (35)	(29) (30) (31)	(30) (29)	-41
STP1xSTP2	(27) (26)	-35	(30) (31) (32)
STP1xTHI2	(27) (26)	(34) (35)	(29) (32)
STP1xZMS1	-28	-35	(29) (30) (31) (32)
SWI4xSWI6	(27) (26)	(34) (35)	(29) (30) (31) (32)	(30) (29)	-39
UME6xZMS1	-28	-34	-31
ABF1xACA1		-34	-32
ABF1xBAS1		-34	(29) (30) (31) (32)
ABF1xCST6		-35	-32
ABF1xGCN4		(34) (35)	(29) (30) (31)
ABF1xHAP5		(34) (35)	(30) (32)
ABF1xHSF1	(27) (26)		(30) (32)
ABF1xINO2	(27) (26)	-34
ABF1xINO4	(27) (26)	-34
ABF1xPHD1		-34	(29) (32)
ABF1xRPN4		(34) (35)	(29) (30) (31) (32)
ABF1xSTB3		-34	(29) (30) (31)	(30) (29)
ABF1xSWI4		-34	(30) (31) (32)
ABF1xTBF1		(34) (35)	-29
ABF1xYPR196W		-34	-29
ACA1xGCN4		-34	(29) (32)	(30) (29)
ACA1xPHD1		-34	-32
ACA1xRPN4		(34) (35)	(30) (31) (32)
ACA1xRTG3		-34	(30) (32)
ACA1xSKN7		-35	-32	(30) (29)
ACA1xSTP1		-34	(30) (31) (32)
ACE2xSKN7	(27) (26)		-32
ACE2xSWI5	(27) (26)		(29) (32)		-53
AFT2xCBF1		-35	(31) (32)
AFT2xFHL1		(34) (35)	-29	(30) (29)
AFT2xMIG1	-27		(29) (31) (32)
AFT2xRPH1	-27		-32
AFT2xRPN4	-27		-32
AFT2xTYE7		-35	-31
AFT2xYJL103C		-35	-32
ARG80xMIG1		-34	-31
ARG80xMIG3	-27		(29) (30) (31)
ARG81xMIG3	-27		-31
ARG81xPHO4		-34	-31
ARG81xRTG3	(27) (26)		(29) (30)
ARG81xSKN7		-34	-31
ARG81xSTP1	(27) (26)		(29) (30) (31)
ARO80xCST6	-27		-32
ARO80xPDR1	(27) (26)		-29
ARO80xPDR3	-27		-32
ARO80xSTP1	(27) (26)		-30
ASH1xMBP1	(27) (26)		-32
ASH1xNDD1	(27) (26)		(29) (30)
ASH1xSTP1	-28		-32
ASH1xSWI6	(27) (26)		-32
BAS1xSTP3		(34) (35)	(29) (31)
CAT8xGAL4		-35	-32
CAT8xGIS1		-35	(30) (31)
CAT8xMIG1		-35	(30) (31)
CAT8xMIG3		-34	(29) (30) (31)
CAT8xMSN2		-35	(29) (30) (31)
CAT8xMSN4		-35	(29) (30) (31)
CAT8xPDR1		-35	(30) (31)
CAT8xPHD1		-35	(30) (31) (32)	-29
CAT8xRDS1		-35	-31
CAT8xRGM1		-35	(30) (31)
CAT8xRPH1		(34) (35)	(30) (31)
CAT8xRSC3		-35	(30) (31)	-30
CAT8xRTG3		-35	(31) (32)
CAT8xSTP1		-35	(29) (30) (31)
CAT8xSUT1		-35	(30) (31)
CAT8xSWI5		-35	(29) (32)	-30
CAT8xUME6		-35	(30) (31) (32)
CAT8xYER184C		-35	(30) (31)
CAT8xYPL230W		-35	(30) (31)
CBF1xDAL81	-27		-32
CBF1xGAT1		(34) (35)	(31) (32)
CBF1xHAC1		-35	-31
CBF1xHAP5	-27	-35
CBF1xMATALPHA2		(34) (35)	-31
CBF1xMET28		-34	-32		-58
CBF1xOAF1		-35	-32
CBF1xPDR8		-35	-32
CBF1xPHD1		-34	(29) (30) (31)
CBF1xPHO4		(34) (35)	(31) (32)
CBF1xRAP1		-35	-32
CBF1xRTG3		(34) (35)	(29) (31) (32)
CBF1xSUT1		(34) (35)	(31) (32)
CBF1xTYE7	-27	(34) (35)
CBF1xYER184C		(34) (35)	-32
CHA4xRGM1		(34) (35)	-32
CIN5xNRG1	(27) (26)		-31
CIN5xPDR3		-35	(30) (31)
CIN5xRGT1	(27) (26)		(31) (32)
CIN5xXBP1	-27		-30
CRZ1xYJL103C		-35	(29) (30) (31)
CST6xSUT1		-35	(29) (30) (31)
CST6xSWI6		-34	-32
CST6xYER184C		-35	(31) (32)	-29
CST6xYJL103C		-35	(31) (32)
CUP9xSFP1		-35	(29) (30) (32)
CUP9xSTP1	(27) (26)		(31) (32)
DAL80xGLN3		-35	-30
DAL80xGZF3	-27		(30) (32)
DAL80xHAP1		-35	-29
DAL82xRDS1		-34	(29) (30)
DAL82xSTP1	-27		(29) (30) (31)	(30) (29)
EDS1xPBF1		-34	(29) (30)	(30) (29)
EDS1xPBF2		-34	(29) (30) (31)
EDS1xSTB3		-34	-30	-30
FHL1xMET31	(27) (26)	-35
FHL1xMIG1		-35	-29
FHL1xMIG3		-35	-29
FHL1xPHO4		-35	-29
FHL1xRCS1		-35	-29	-29
FHL1xRSC3		-35	-29
FKH1xSTB1		-34	(29) (30) (31)	-29
FKH1xSWI4	(27) (26) (28)		(29) (30) (31) (32)	-29	-47
FKH2xHCM1		-34	-32
FKH2xSWI4	(27) (26) (28)		(29) (30) (31) (32)	-29
GAL4xGAL80	-27	(34) (35)
GAL4xPDR1	(27) (26)	-35
GAL80xMIG3	-27	(34) (35)
GAL80xSTP1	-27		-32
GAL80xSUT1		-34	-32
GAT1xGLN3	-27	-35		-29
GAT1xGZF3	-27		-32
GAT1xSIP4	-27		-32
GAT4xGCR1		-34	-31
GAT4xLYS14		-34	-29
GCN4xSTB3		(34) (35)	(29) (30)
GCN4xTYE7		(34) (35)	(29) (30) (31) (32)
GCR1xSTP2	(27) (26)	-34
GIS1xMIG1		-34	(29) (30) (31)	(30) (29)
GIS1xMIG3		(34) (35)	(29) (30) (31)	-29
GIS1xNHP10		-34	(30) (31)
GIS1xRPH1		-35	(29) (30) (31)	-30
GIS1xSUT1		(34) (35)	(29) (30) (31)	-29
GIS1xYER184C		(34) (35)	(30) (31)	-30
GIS1xYJL103C		-35	(30) (31)	-30
GSM1xMIG3		-34	(30) (31)
GSM1xSUT1		-34	(30) (31)
HAC1xPHO4		-35	-31
HAC1xYLL054C		-35	-31
HAP1xMIG1		-34	(29) (31)	-30
HAP1xPHO4		(34) (35)	-31
HAP1xRDS1		-35	-31
HAP1xSKN7	-27	-35
HAP1xSOK2		-35	-31
HAP1xTOS8	-27	-35
HAP1xYER184C		(34) (35)	-29
HAP1xYJL103C		-34	-30
HAP2xSUT1		(34) (35)	(30) (31)
HAP3xMBP1		(34) (35)	(30) (31)
HAP3xMIG3	-27	(34) (35)
HAP3xPDR8		(34) (35)	-32
HAP3xRDS1	-27	-35
HAP3xSKN7		-35	-32
HAP3xSUT1		(34) (35)	(29) (31)
HAP3xZMS1		(34) (35)	(29) (32)
HAP4xRDS1	-27		(30) (31)	-30
HAP4xSKN7		(34) (35)	-32
HAP4xSUT1		(34) (35)	(30) (31) (32)	(30) (29)
HAP5xNHP10		(34) (35)	-30
HAP5xRDS1		-34	-31	-29
HAP5xSKN7		(34) (35)	(30) (31) (32)
HAP5xSUT1		(34) (35)	(30) (31)
HMRA2xMCM1		(34) (35)	-29
HMS1xMIG3	-27		(29) (31)
HMS1xNHP10		-34	-31
HMS1xSOK2	-26		-32
HMS1xSUT1	-27		(30) (31)	-30
IME1xPDR3		-35	-31
IME1xRDS1	-27		-30
IME1xSUT1		-35	(30) (31) (32)	-30
IME1xUME6		-34	-30		-46
IME1xYPR196W		-35	(30) (31)
INO2xMATALPHA2		-35	-30
INO2xPDR3		-34	-30
INO2xRAP1	(27) (26) (28)	-35
INO2xTYE7		(34) (35)	-31
INO2xYAP7		-34	(29) (30)
INO4xTYE7		(34) (35)	(29) (31)
INO4xYAP7		-34	(29) (30) (31)
LEU3xSTP2	-27		-32
LEU3xSUT1	-27		(29) (31) (32)
LEU3xSWI4	-28		(29) (31) (32)
LYS14xMIG1		-35	(29) (30) (31)
LYS14xPDR3		-35	(30) (31)
LYS14xSTB5		-34	(29) (31)
LYS14xSTE12		-34	-31	-29
LYS14xYJL103C		-34	-29
MATALPHA2xMCM1		-34	-31		-54
MATALPHA2xNHP6B		-34	-29
MATALPHA2xSTE12		-34	-29	-29
MBP1xMCM1	(27) (26)		(29) (31)	-30
MBP1xMET28		-34	-29
MBP1xPHD1	(27) (26)		-31
MBP1xREB1		-34	-30
MBP1xRTG3	-27		-29
MBP1xSTB2		(34) (35)	(29) (30) (31) (32)	(30) (29)
MBP1xUME6	-27	-34
MBP1xYDR026C		-34	(29) (30) (31) (32)
MCM1xNDD1	(27) (26)		(29) (30) (31)		-56
MCM1xSTP1	(27) (26)		-32
MCM1xYOX1	-27		(29) (30) (31) (32)		-55
MET28xSTB1		-34	(29) (30) (31) (32)	-29
MET28xSUM1		-34	(30) (32)
MET28xSWI4		-34	(29) (31) (32)
MET28xSWI6		-34	(29) (30)
MET31xMIG3	-27		(30) (31)
MET31xPDR1	(27) (26)		-29
MET31xRPN4	-27	(34) (35)		-30
MET32xPHO4		(34) (35)	(29) (30)
MET4xRDS1		-35	-30
MET4xTYE7		(34) (35)	(29) (30) (31)
MIG1xMSN2		(34) (35)	(29) (30) (31) (32)	-29
MIG1xMSN4		(34) (35)	(29) (30) (31) (32)	-29
MIG1xNRG1	(27) (26)		(29) (30) (31) (32)
MIG1xPDR1		-34	(29) (30) (31)
MIG1xPHO4		(34) (35)	(29) (31) (32)
MIG1xRCS1	-26		(29) (31) (32)
MIG1xRDS1		-35	(30) (31) (32)
MIG1xRGM1		-34	(29) (30) (31) (32)	(30) (29)
MIG1xSFP1		(34) (35)	-32
MIG1xSTP1		-35	(29) (30) (31) (32)
MIG1xSTP2		-35	(29) (30) (31)
MIG1xUGA3	(27) (26)		(31) (32)
MIG1xYER184C		-34	(29) (30) (31) (32)
MIG1xYJL103C		(34) (35)	(30) (31)
MIG1xYPL230W		-34	(29) (30) (31)	(30) (29)
MIG1xZMS1		-34	(29) (30) (31) (32)
MIG2xSOK2	-27		-32
MIG3xMSN2		(34) (35)	(29) (30) (31)	(30) (29)
MIG3xPDR1		(34) (35)	(29) (30) (31)
MIG3xPDR8		(34) (35)	(29) (30) (31)
MIG3xRDS1		-34	(30) (31)
MIG3xRGM1		(34) (35)	(29) (30) (31)	-29
MIG3xSOK2	-27	-35
MIG3xSTB5	-27		(29) (30) (31)
MIG3xSTP2	-27		(29) (30) (31)
MIG3xYER184C		(34) (35)	(30) (31)
MIG3xYJL103C		(34) (35)	(30) (31)
MIG3xYPL230W		(34) (35)	(29) (30) (31)	-29
MIG3xZMS1		-34	(29) (30) (31)	(30) (29)
MSN2xNDD1	(27) (26)		-31
MSN2xPHO4		-35	-31	-30
MSN2xRPH1	(27) (28)		(29) (30) (31) (32)
MSN2xSUT1		(34) (35)	(29) (30) (31) (32)	(30) (29)
MSN2xYJL103C		-35	(29) (30) (31) (32)
MSN4xNDD1	(27) (26)		-31
MSN4xNRG1	-27		(29) (30) (31)
MSN4xPHD1	(27) (26)		(29) (30) (31)
MSN4xRGM1	(27) (26)	-35		(30) (29)
MSN4xRPH1	-27		(29) (30) (31) (32)	-30
MSN4xSUT1		(34) (35)	(29) (30) (31)	-30
MSN4xUGA3	-27		(29) (30) (31) (32)	(30) (29)
MSN4xYER184C		(34) (35)	(29) (30) (31)
MSN4xYJL103C		(34) (35)	(29) (30) (31)
MSN4xZMS1		-35	(29) (30) (31)	(30) (29)
NDD1xRDR1		-34	(30) (31)
NDD1xSUT1	-27		-31
NDD1xSWI4	(27) (26)		(29) (31)
NDD1xXBP1	-27		-29
NHP10xNRG1		-34	(29) (30) (31)
NHP10xPDR1		-34	(29) (30) (31)
NHP10xPHD1		-34	(30) (31)
NHP10xRGM1		-34	(30) (31)
NHP10xSUT1		-34	(29) (31)	-30
NHP10xYER184C		(34) (35)	(29) (30) (31)	-29
NHP10xYJL103C		-34	(29) (30) (31)
NHP10xYPL230W		-34	(30) (31)
NHP6AxSTB5		-34	(29) (31)	(30) (29)
NHP6BxSTB5		-34	-31	-29
NRG1xPHD1	(27) (26)		(29) (30) (31)
NRG1xSKN7	(27) (26)		-32
NRG1xSUT1	-27		(30) (31) (32)
NRG1xYDR026C		-35	(29) (30)
NRG1xYJL103C		-35	-30
OAF1xPDR1	-27		-31
OAF1xRDS1		-35	-31
OAF1xUME6		(34) (35)	(30) (31)
OPI1xSUT1	-27		-32
OPI1xSUT2		-34	-32
PBF1xSTB3		-34	(29) (30) (31)	(30) (29)
PBF2xSTB3		(34) (35)	(29) (30) (31)	(30) (29)
PDR1xPDR3		-34	(30) (31)
PDR1xRGM1	(27) (26)		(29) (30) (31)
PDR1xSTB1	(27) (26)		-29
PDR1xSTP1	(27) (26)		(30) (31)
PDR1xSUT1		-34	(29) (30) (31)
PDR1xYER184C		(34) (35)	(30) (31)
PDR1xYJL103C		-35	(30) (32)
PDR3xPDR8		(34) (35)	-31
PDR3xRDR1		-34	-32
PDR3xRDS1	-27	-34
PDR3xRGT1		-35	-31	-30
PDR3xSUT1		-35	(30) (31)
PDR3xUME6		-34	(30) (32)
PDR8xPHO4		-35	-31
PDR8xRDS1		-34	-30
PDR8xSTP1		-35	(29) (30) (31) (32)
PDR8xTYE7		-34	(30) (31)	-30
PDR8xUME6		-34	-32
PDR8xYER184C		-35	-29
PDR8xYPR196W		-34	-31	-30
PHD1xRGM1	-26		(29) (30) (31)
PHD1xSKN7	(27) (26)		(31) (32)
PHD1xSOK2	(27) (26)		(31) (32)
PHD1xTYE7		-34	(30) (32)
PHD1xZMS1		-35	(29) (30) (31)
PHO4xRAP1		(34) (35)	-32
PHO4xSFP1		(34) (35)	-32	-30
PHO4xSTP1		-35	(31) (32)
PHO4xSUT1		(34) (35)	(29) (31) (32)
PHO4xTYE7		(34) (35)	(29) (31) (32)
RAP1xRCS1		(34) (35)	(29) (32)
RAP1xRPH1	(27) (26) (28)	-35
RAP1xRSC3		-35	-31
RAP1xYJL103C		(34) (35)	-29
RCS1xRPH1	-27		(31) (32)	-29
RCS1xSOK2		-34	(30) (31) (32)	-30
RCS1xSTP2	-26		(29) (31) (32)
RDR1xUGA3		-35	(29) (31) (32)
RDS1xREB1	-27		-30
RDS1xRGT1		-35	(30) (31)
RDS1xRPN4		-35	(29) (32)
RDS1xSTB2	-27		(31) (32)
RDS1xSWI4		-34	(29) (32)	-29
RDS1xYER184C		-35	-32
RDS2xSKN7		-35	(30) (31) (32)
REB1xSKN7	-28	-35
REB1xSTB3		-34	(29) (30) (31)	(30) (29)
REB1xSTP1	-28		-32
REB1xSWI4	-28		(31) (32)
REB1xSWI6		-34	(31) (32)	-29
REB1xUME6	-28		(29) (31) (32)
RGM1xSUT1		(34) (35)	(29) (30) (31) (32)	-29
RGM1xYER184C		(34) (35)	(30) (31) (32)	-30
RGM1xYJL103C		-35	(30) (31) (32)	-30
RGM1xZMS1	(27) (26)		(30) (31)	-30
RGT1xYJL103C		-35	-31	-29
RGT1xYPR196W		-35	-31
RPH1xSUT1		-35	(29) (30) (31) (32)
RPH1xYER184C		-35	(30) (32)
RPH1xYJL103C		-35	(30) (32)
RPH1xYPL230W		-35	(29) (30) (31) (32)	-30
RPN4xSUT1		(34) (35)	(30) (31) (32)
RPN4xYDR026C		(34) (35)	(29) (30) (31) (32)
RPN4xZMS1		(34) (35)	(30) (32)
RSC3xSFP1		-35	-29
RTG3xSKN7	-27		-32
RTG3xSUM1	(27) (26)		(30) (32)	-29
RTG3xSUT1		(34) (35)	-29
RTG3xSWI6		-34	(29) (32)
RTG3xTYE7	-27		(31) (32)
SIG1xXBP1		-34	-29
SIP4xSTP1	(27) (26)		-32
SKN7xSOK2	(27) (26)		-32	-30
SKN7xSTB1	-26		-32
SKN7xSTP1	-28		(29) (32)
SKN7xSUT1	-27		(29) (32)	-30
SKN7xSWI4	(27) (26) (28)		(31) (32)	-29
SKN7xSWI5	(27) (26) (28)		(29) (32)
SKN7xSWI6	(27) (26)		-32
SKN7xUME6	(27) (28)		(30) (32)
SKN7xYJL103C		(34) (35)	-29
SNT2xSTB5		-34	(30) (31)
SOK2xSUT1	-27		-32
STB1xSTB2		-34	(31) (32)
STB1xXBP1		-35	(29) (30) (32)
STB2xSTB3		-34	(29) (30) (31)	(30) (29)
STB2xSWI4		-34	(30) (31) (32)	-30
STB2xSWI6		(34) (35)	(29) (30) (31) (32)	(30) (29)
STB2xYER184C	-27		-32
STB2xYRR1	-27		-32
STB3xSWI6		-34	-30
STB3xYBL054W		-34	(29) (30) (31)	(30) (29)
STB4xUGA3		-35	(30) (31)
STB4xYER184C	-27		(29) (32)
STP1xSUM1	(27) (26)		-32	-30
STP1xSUT1		-35	(29) (30) (31) (32)	(30) (29)
STP1xSWI4	-28		-32
STP1xUGA3	(27) (28)		(29) (30) (31) (32)
STP1xUME6	-28		(30) (31) (32)
STP1xYER184C		-35	(29) (30) (31)
STP1xYJL103C		-35	(29) (30) (31)
STP2xZMS1		-34	(29) (30) (31) (32)
SUM1xSWI6		-35	-32	-29
SUT1xSWI4	-27		(29) (32)	-29
SUT1xSWI6	-27		(29) (32)
SUT1xYER130C		-35	(29) (30) (31)	(30) (29)
SUT1xYER184C		(34) (35)	(30) (31) (32)
SUT1xYJL103C		(34) (35)	(30) (31)
SUT1xYPL230W		(34) (35)	(29) (30) (31)	-29
SUT1xYPR196W		-35	(30) (31) (32)
SUT1xZMS1		(34) (35)	(29) (30) (31) (32)	-30
SWI4xUGA3	-28		(29) (31) (32)
SWI4xXBP1	-28		(29) (30) (31)
SWI6xYDR026C		-34	-31
UGA3xYER184C		-35	-31
UGA3xYJL103C		-35	-31
UME6xYER184C		-34	(30) (31)
UME6xYPR196W		(34) (35)	(30) (31)	-30
USV1xZMS1		-35	(29) (30) (31)
YAP3xYAP7		-34	-32
YER184CxYPL230W		(34) (35)	(30) (31)	-30
YJL103CxYPL230W		-35	(30) (31)	-30
YJL103CxYPR196W		-35	(30) (31)
YJL103CxZMS1		(34) (35)	(30) (31)
YPR196WxYRM1		-34	-30	-29
ABF1xDIG1		-34
ABF1xHAC1			-31
ABF1xHMS1		-34
ABF1xIME1		-35
ABF1xMATALPHA2		-34
ABF1xMBP1			(30) (31)
ABF1xMIG1			-32
ABF1xPDR1		-34
ABF1xPDR3		-34
ABF1xRDS1		-34
ABF1xREB1			-32
ABF1xRGM1			-32	-30
ABF1xRTG3			-32
ABF1xSKN7			-32
ABF1xSTB1			(30) (31)
ABF1xSTP1			-32
ABF1xSUM1			(29) (30) (31) (32)
ABF1xSUT1			-31
ABF1xSWI6			(30) (32)
ABF1xTYE7	-27
ABF1xYDR026C			-29
ABF1xYER184C			-32
ABF1xZAP1	-26
ABF2xXBP1			-29
ACA1xAFT2			-29
ACA1xCAT8			(30) (31) (32)
ACA1xGAL80		-35
ACA1xGIS1			-30
ACA1xMET31			(29) (30)
ACA1xMIG1			-29
ACA1xMIG3			(29) (30)
ACA1xMSN2			(30) (31)
ACA1xMSN4			(29) (30) (31)
ACA1xNHP10			(30) (31)
ACA1xRDS1			(29) (30) (31)
ACA1xRGM1			-30
ACA1xRPH1		-35
ACA1xSTP3			-31	-29
ACA1xSUT1			(29) (30) (31) (32)
ACA1xSWI6			(30) (32)
ACA1xUME6			-32
ACA1xYPL230W			-30
ACA1xZMS1			-29
ACE2xCBF1			-32
ACE2xMET28			-29
ACE2xRSC3			-29
ACE2xRSC30			-29
ACE2xTYE7			(29) (32)
AFT1xAFT2		-34
AFT1xRCS1		-34		-29
AFT2xCAT8			-31
AFT2xINO2			(31) (32)
AFT2xMIG3			(29) (31)
AFT2xPHD1			(29) (31)
AFT2xPHO4			(29) (31) (32)	-30
AFT2xRSC3			-29
AFT2xSTB2			(29) (32)
AFT2xSTP1			(31) (32)
AFT2xSUT1			(29) (31) (32)
AFT2xZMS1			(31) (32)
ARG80xSTB3		-34
ARG80xSUT2			-32
ARG80xZMS1			(29) (31)
ARG81xCAT8			-31
ARG81xMIG1			-31	-29
ARG81xRDS1			-30
ARG81xRPH1	(27) (26)
ARG81xSTP2	(27) (26)
ARG81xSTP3			-31
ARG81xSUT1			(29) (31)
ARG81xYJL103C			-32
ARO80xIME1			-29
ARO80xPHD1			-32
ARO80xUME6			-29
ARO80xYRM1		-35
ASG1xGIS1		(34) (35)
ASG1xPHD1		-35
ASG1xRGM1		(34) (35)
ASG1xSTB5		-35
ASG1xSTP1		(34) (35)
ASG1xSTP3		-35
ASG1xYPL230W		-35
ASH1xCBF1			-32
ASH1xMCM1			-32
ASH1xOPI1			-32
ASH1xTYE7			-32
ASH1xYPR196W	-27
CAD1xCBF1	-27
CAT8xDAL82			-30
CAT8xHAC1			-31
CAT8xNHP10			(30) (31)
CAT8xNRG1			(30) (31)
CAT8xPDR3			(30) (31) (32)
CAT8xRCS1			-31
CAT8xRDS2			(30) (32)
CAT8xSKN7			(30) (31) (32)
CAT8xSTB4			-31
CAT8xSTB5			(30) (31) (32)
CAT8xSTP2			(30) (31)
CAT8xUGA3			(30) (31)
CAT8xYDR026C			-31	-29
CAT8xYJL103C		-35
CAT8xYLL054C			-31
CAT8xYPR196W			(30) (31)
CAT8xYRM1			-30
CAT8xZMS1			(30) (31)
CBF1xCRZ1			(30) (31) (32)
CBF1xFHL1			-29
CBF1xHAP1		(34) (35)
CBF1xHMS1			(29) (31)	-29
CBF1xMBP1			(29) (32)
CBF1xMET31	(27) (26)				-58
CBF1xPDR3			-32
CBF1xRDS2			-31
CBF1xREB1			-32
CBF1xRPH1			(29) (30) (31) (32)
CBF1xSFP1			(29) (32)
CBF1xSTB2			-32
CBF1xSTB4			-31
CBF1xSTP1			(29) (31) (32)
CBF1xYDR026C			-32
CBF1xYDR520C			-32
CBF1xYJL103C		(34) (35)
CBF1xYOX1			-32
CBF1xYRM1			(30) (31)
CEP3xMIG3		-35
CEP3xRDS1		-34
CEP3xSTB4			-29
CEP3xYNR063W		(34) (35)
CHA4xGIS1		(34) (35)
CHA4xYPL230W		(34) (35)
CIN5xMET4			-29
CIN5xNHP6A	-28
CIN5xPDR8			(30) (31)
CIN5xSTB2			-30
CIN5xYPR196W			-31	-30
CRZ1xGIS1			(29) (30) (31)
CRZ1xINO2			(30) (31) (32)
CRZ1xMSN2			(29) (30) (31) (32)	-30
CRZ1xPDR3			(30) (32)
CRZ1xRDS1			-30
CRZ1xRGM1			(29) (30) (31) (32)
CRZ1xSTP1			(30) (31) (32)
CRZ1xSUT1			(29) (30) (31) (32)
CRZ1xTYE7			-31
CRZ1xYPL230W			(29) (30) (31)
CST6xYLL054C		-35
CUP9xRSC3		-35
CUP9xRSC30		-35
DAL80xGAT1			(30) (32)
DAL80xXBP1			(31) (32)	(30) (29)
DAL82xHAP3	-26
DAL82xIME1			-29
DAL82xLYS14			-31
DAL82xMBP1			-29
DAL82xMCM1			(29) (31)
DAL82xPDR1			(29) (30) (31)
DAL82xPHD1			-31	-29
DAL82xREB1			-29
DAL82xRSC3			-30
DAL82xSTB1			(29) (32)
DAL82xSUT1			(30) (31)
DAL82xSWI4			-29
DAL82xTYE7			-32
DAL82xYER184C			-31
ECM23xGAT4		-34
ECM23xGCR1		-34
ECM23xMET4		-35
EDS1xGAL80	-27
EDS1xMBP1		-34		-29
EDS1xRGT1			-29	-29
FHL1xINO4	-28
FHL1xTYE7			-29
FHL1xYJL103C		(34) (35)
FKH1xHCM1		-34		-30
FKH1xNDD1	(27) (26)				-56
FKH2xNDD1	(27) (26)			-29	-56
GAL4xMSN4	(27) (26)
GAL4xRGM1	(27) (26)
GAL80xGIS1		-34
GAL80xIME1		-35
GAL80xSKN7		-34
GAL80xYER184C		-34
GAL80xYJL103C		-34
GAL80xYPL230W		-34
GAT3xMCM1			-32
GAT3xRLM1			-29
GAT4xMOT3		-34
GCN4xRSC3			-31
GCN4xTBF1			-29
GCR1xLYS14		-34
GCR1xSTB4		-34
GCR2xSNF1			-32
GCR2xSTB4			-29
GCR2xYBL054W		-34		(30) (29)
GIS1xMIG2			(30) (31)
GIS1xMSN4		-35		(30) (29)
GIS1xNRG1			(29) (30) (31)
GIS1xOAF1			(30) (31)	-30
GIS1xOPI1			-29
GIS1xPDR1			(29) (30) (31)
GIS1xPHD1			(29) (30) (31)
GIS1xRDS1			(30) (31)
GIS1xRDS2			(29) (30) (31)	-30
GIS1xRSC3			(29) (30) (31)	-30
GIS1xSKN7			(30) (31)
GIS1xSOK2			-31
GIS1xSTP1			(29) (30) (31)	-30
GIS1xTBF1			-30	-30
GIS1xUGA3			(29) (30) (31)
GIS1xUME6			(30) (31)
GIS1xYDR026C			(30) (31)	-30
GIS1xZMS1			(30) (31)	-30
GSM1xMIG1			(30) (31)
GSM1xRDS1		-35
GSM1xREB1			-29
GTS1xMET32			-32	-29
HAC1xMIG1			(29) (31)
HAC1xPHD1			-31
HAC1xSWI6			-29
HAC1xTYE7	-27
HAP1xMIG3		(34) (35)
HAP1xREB1			-29
HAP1xRSC3			-31	-30
HAP1xSFP1			-29
HAP1xZMS1			(29) (31)
HAP2xRDS1			-30
HAP2xYLL054C		-35
HAP3xRSC3			(29) (30) (31)
HAP3xSWI6		-35
HAP3xYAP3			-32
HAP3xYBL054W		-35
HAP4xYLL054C			-30
HAP5xPHD1			-32
HAP5xRSC3			(29) (30) (31)
HAP5xSTP2	(27) (26)
HAP5xYAP3			-32
HAP5xYDR026C		(34) (35)
HCM1xMCM1		-35		-30
HMRA2xNHP6B			(30) (31)
HMS1xMIG1			(29) (30) (31)	-30
HMS1xRSC3			-30
HMS1xYOX1	-27
HMS1xZMS1			(30) (31)
HSF1xYRR1	-27
IME1xMCM1			(29) (30) (32)
IME1xNDD1			(29) (31)
IME1xPDR1			-30
IME1xRPN4			(30) (31) (32)
IME1xRSC3			(29) (30) (31)
IME1xRSC30			(29) (30) (31)
IME1xSTP1			(30) (31)
IME1xUGA3			(29) (30) (31)
INO2xOAF1			-32
INO2xRCS1			(31) (32)
INO2xRDS1		-34
INO2xREB1	-28
INO2xSTB2			-32
INO2xSTB4			-32
INO2xYDR026C			-32
INO4xPHO4		-35
INO4xRAP1	(27) (26) (28)
INO4xREB1	-28
INO4xXBP1	-28
INO4xYLL054C		-34
LEU3xMIG3	-27
LEU3xSTB1			-29
LEU3xSUT2		(34) (35)
LEU3xYJL103C		-35
LYS14xNHP10			(30) (31)	-29
LYS14xNRG1		-35
LYS14xPDR8		-35
LYS14xSTB4		-34
LYS14xSUT1			(30) (31)
LYS14xSUT2		-35
LYS14xYLL054C			-31
LYS14xYRM1			-31
MATA1xRLM1	-26
MBP1xNDT80			-30
MBP1xRDS1			-32
MBP1xSTB3			-30
MBP1xSTP1			-31
MBP1xSTP2			-31
MBP1xSUT1			(29) (31) (32)
MBP1xTYE7			-29
MCM1xMSN2			(29) (30) (31)
MCM1xPHD1			(31) (32)
MCM1xRDS2			(30) (32)
MCM1xSTB1			(29) (32)
MCM1xSTP2			-32
MCM1xUGA3			(29) (31) (32)
MCM1xUME6			(30) (32)
MCM1xXBP1			-29
MCM1xYPR196W			-32
MET28xPHO4			(31) (32)
MET28xSTB5		-34		(30) (29)
MET28xSUT1			(29) (30) (32)
MET28xYNR063W		-35
MET31xMIG1			(29) (30) (31)
MET31xMSN4			(29) (30) (31)
MET31xPHO4			(31) (32)
MET31xRSC3			-30
MET31xSKN7			(31) (32)
MET31xSTP3			-31
MET31xTYE7			-32	-30
MET4xSKN7			-31
MET4xSTB2			-31
MIG1xOAF1			(30) (31) (32)
MIG1xOPI1			-32
MIG1xPDR3			-31
MIG1xPDR8			(30) (31) (32)
MIG1xRPH1			(29) (30) (31) (32)
MIG1xSIP4		-35
MIG1xSTB2			-32
MIG1xSTB5			(30) (31)
MIG1xSUT2			(30) (31) (32)
MIG1xUME6			(30) (31) (32)
MIG1xYDR026C			-32
MIG1xYRM1			(30) (31)	-29
MIG2xRGM1			(30) (31)
MIG2xSTP2			-32
MIG2xSUT1			(30) (31) (32)
MIG2xYPL230W			(30) (31)
MIG3xOAF1			(30) (31)	-29
MIG3xOPI1	-27
MIG3xRPH1			(29) (30) (31)
MIG3xRPN4		-35
MIG3xRSC3			-31
MIG3xSKN7			-29
MIG3xSTB2			-29
MIG3xSTP3			(30) (31)
MIG3xSUT2			(30) (31)
MIG3xUGA3			(29) (30) (31)
MIG3xUME6			(30) (31)
MIG3xYDR520C			-30
MIG3xYER130C			(30) (31)
MIG3xYRM1			(30) (31)
MOT3xUSV1		-35
MSN2xMSN4	(27) (26)			(30) (29)
MSN2xREB1	-28
MSN2xRSC3			(29) (30) (31)	(30) (29)
MSN2xSOK2			(31) (32)	-30
MSN2xYDR026C			(29) (30) (31)
MSN2xYER184C			(30) (31)
MSN4xRDS1			(30) (31)
MSN4xRSC3			(29) (30) (31)	(30) (29)
MSN4xSTP1			(29) (30) (31)	-30
MSN4xYDR026C			(29) (30) (31) (32)
MSN4xYLL054C			-30
MSN4xYPL230W		-35		(30) (29)
NDD1xRDS2			-31
NDD1xYLL054C		-35
NHP10xOAF1			(30) (31)
NHP10xRDS1			-30
NHP10xRDS2		-34
NHP10xSKN7			-29
NHP10xSTB5			(29) (30) (31)
NHP10xSTP1			(30) (31)
NHP10xSTP2			(29) (30) (31)
NHP10xYRM1		-34
NHP10xZMS1			-30
NHP6AxNHP6B		-34
NHP6AxSPT15		(34) (35)
NHP6BxPHO2		(34) (35)
NHP6BxRLM1			(29) (30) (31)
NRG1xOPI1			-32
NRG1xRDR1			-32
NRG1xREB1			-32
NRG1xRGM1			(29) (30) (31)
NRG1xRSC3			(30) (31)
NRG1xSTB2			(29) (32)
NRG1xTBF1			-30
NRG1xYBL054W			-32
NRG1xYER184C			(29) (30) (31)
NRG1xYPL230W			(29) (30) (31)
NRG1xZMS1			(29) (30) (31) (32)
OAF1xOPI1			-32
OAF1xPDR8			(30) (31) (32)	(30) (29)
OAF1xRGT1			-31
OAF1xSTB5			-30
OAF1xSTP1			(29) (30) (31) (32)
OAF1xSUT1			(29) (30) (31) (32)	(30) (29)
OAF1xYPL230W			(30) (31)	-30
OAF1xYPR196W			(31) (32)
OAF1xZMS1			(29) (30) (31) (32)	-30
OPI1xREB1			-29
OPI1xRGM1			-29
OPI1xRSC3		-35
OPI1xRSC30		-35
OPI1xSFP1			-32
OPI1xSTB2			-32
OPI1xYBL054W			-32
OPI1xYPL230W			-29
OPI1xYPR196W			-32
OPI1xZMS1			(31) (32)
PBF1xPBF2		-34
PDR1xRDR1			(30) (31)
PDR1xRDS1			-30
PDR1xREB1			-31
PDR1xRGT1			-31
PDR1xRSC3			(29) (30) (31)	(30) (29)
PDR1xRSC30			(29) (30) (31)
PDR1xSWI4			-29
PDR1xUGA3			(29) (31)
PDR1xUME6		-34
PDR1xYDR026C			-32
PDR1xYPL230W			(29) (30) (31)
PDR1xYRM1			(30) (31)
PDR3xPHO4			-32
PDR3xRSC3			-31
PDR3xRTG3			-32
PDR3xSKO1			-32
PDR3xSUT2			(30) (31)
PDR3xYER184C			(31) (32)
PDR3xYJL103C			-31
PDR3xYRM1		-34
PDR8xRDR1			-29
PDR8xREB1			-29
PDR8xRGT1			(30) (31) (32)
PDR8xSTB5			(30) (31) (32)
PDR8xSUT1			(30) (31)	-30
PDR8xSUT2			-32
PDR8xYJL103C		-35
PDR8xYRM1			(30) (31)
PHD1xPHO4			(30) (31) (32)
PHD1xRDS1			(29) (30) (31)
PHD1xREB1			(31) (32)
PHD1xRPH1			-31
PHD1xRSC3			-29
PHD1xSTB2			-31
PHD1xSTP1			(31) (32)
PHD1xSTP2			(29) (30) (31)
PHD1xUGA3			-31
PHD1xXBP1			-31
PHD1xYER184C			-31
PHD1xYJL103C			-31	-30
PHD1xYPL230W			(29) (30) (31)
PHO2xSPT15		(34) (35)
PHO4xRSC3			-30
PHO4xSKN7			(31) (32)
PHO4xSTB4			-31	-30
PHO4xSTP2			(30) (31) (32)
PHO4xYDR026C		-34
RAP1xSTP2		-35
RAP1xTYE7			(29) (32)
RCS1xRSC3			-29
RCS1xSUT1			(29) (30) (31) (32)
RCS1xZMS1			(30) (31) (32)	-30
RDR1xSTB1			-32
RDR1xSTP1			-32
RDR1xSUT1			(30) (31) (32)
RDS1xRDS2			(30) (31)	-29
RDS1xRGM1			(30) (31) (32)
RDS1xRPH1			-30
RDS1xRSC3		-35
RDS1xRSC30		-35
RDS1xSKN7			-29
RDS1xSTB1			-29
RDS1xSTB5			(29) (30) (31)
RDS1xSTP2			-32
RDS1xSUT1			(29) (30) (31) (32)
RDS1xUGA3			-31
RDS1xUME6		-34
RDS1xYDR026C			(30) (31)
RDS1xYDR520C			-32
RDS1xYJL103C		-35
RDS1xYPL230W			(30) (31)
RDS1xYRM1			(29) (30)
RDS1xZMS1			(30) (31)
RDS2xRGM1			(29) (30) (31)	-30
RDS2xSTB4			-30
RDS2xSTB5			-32
RDS2xSTP1			(31) (32)	-29
RDS2xSUT1			-31
RDS2xTYE7			(31) (32)
RDS2xYJL103C			-30
RDS2xYPL230W			(29) (30) (31)	-30
RDS2xYPR196W			(30) (31)
RDS2xZMS1			(29) (30) (31)
REB1xRGM1			-32
REB1xSTB1			-31	-30
REB1xSTB2		-34		-30
REB1xSTB5			-32
REB1xSTP2			-31
REB1xSUM1			-32	-29
REB1xTBF1			-29
REB1xYER184C			-32
REB1xYPR196W			-29
REB1xYRM1			-29
RGM1xRSC3			(29) (30) (31)	-30
RGM1xSKN7			(30) (31)
RGM1xSOK2			(31) (32)
RGM1xSTP1			(29) (30) (31) (32)	-30
RGM1xTBF1			-30	-30
RGM1xUGA3			(29) (30) (31)
RGM1xUME6			(30) (31) (32)
RGM1xYDR026C			(30) (31) (32)	-30
RGM1xYER130C			-32
RGT1xRSC3			(30) (31)
RGT1xSKN7			-32
RGT1xSTB3		-34
RGT1xSTP1			-32
RGT1xUGA3			-31
RGT1xUME6			-32
RGT1xYRM1			-31	-30
RGT1xZMS1			-31
RPH1xRSC3			-31
RPH1xYER130C			(30) (31) (32)
RPN4xUME6			(30) (31) (32)
RSC30xSUT1		-35
RSC30xUME6			(29) (31)	(30) (29)
RSC30xYRM1			(29) (30) (31)
RSC30xZMS1			-31
RSC3xRTG3			-29
RSC3xSKN7			-31
RSC3xSTB5			-31
RSC3xSTP1			-29	-29
RSC3xSTP2			-29
RSC3xSUT1			(30) (31)
RSC3xSWI5			-29
RSC3xSWI6			(29) (31)
RSC3xXBP1			-31
RSC3xYLL054C			-31
RSC3xYPL230W			(29) (30) (31)	-30
RSC3xYPR196W			-31	(30) (29)
RSC3xYRM1			(29) (30) (31)
RSC3xZMS1			(29) (30) (31)
RTG3xSTB1			(29) (30) (32)	(30) (29)
RTG3xSWI4			(29) (30) (32)	-29
SFP1xTYE7			-32
SIP4xSKN7		-35
SKN7xSTB4			-29
SKN7xSTB5			-32
SKN7xSUT2			(30) (32)
SKN7xYDR520C			-31
SKN7xYER184C			(29) (31)
SKN7xYPL230W			(30) (31)
SKO1xSUM1			(30) (32)
SNT2xSTP3		-34
SOK2xYPL230W			(31) (32)
SOK2xZMS1			-32
SPT15xUPC2			(29) (30) (31)
SPT23xSTB3			-29
SRD1xYER130C			(30) (31)
STB1xSTB3			(30) (31)	-29
STB1xSTP1			-32
STB1xSUT1			(29) (32)
STB1xUGA3			(29) (32)
STB1xYDR026C			-32
STB1xYER184C			-29
STB1xYRM1			-29
STB2xSTP1			-32
STB2xSTP2			(31) (32)
STB2xSUM1	-27
STB2xSUT1			-32
STB2xTYE7	-27
STB2xUME6			-29
STB2xYDR026C			-32
STB2xZMS1			-32
STB3xSWI4			(30) (31)	-29
STB3xXBP1			(30) (32)
STB3xYDR026C			-29
STB3xYRR1		-35
STB4xSTB5	-27
STB4xSUT1			-32
STB4xSUT2			-32
STB4xYJL103C			(29) (32)
STB5xSTP2			(30) (31) (32)
STB5xSUT1			-31
STB5xSUT2			-30
STB5xYDR520C			(30) (31) (32)
STP1xSWI6			-32
STP1xTYE7			(31) (32)
STP1xYLL054C			-29
STP1xYPL230W			(29) (30) (31)	-30
STP2xSUM1			-32
STP2xSUT1			(29) (30) (31) (32)
STP2xYER184C			-32
STP2xYJL103C			-30
STP3xSUT1			(29) (31)
SUT1xSUT2			(30) (31) (32)	-29
SUT1xTYE7			(29) (31) (32)
SUT1xUGA3			(30) (31)
SUT1xUME6			(30) (31) (32)	-30
SUT1xYDR520C			-32
SUT1xYRM1			(30) (31)
SUT2xXBP1			-32
SUT2xYER184C			(30) (32)
SUT2xZMS1			(30) (31) (32)
SWI4xYDR026C			-32
SWI6xUGA3			(29) (31)
TBF1xTYE7			-29
TBF1xYDR026C			-29
TBF1xYPL230W			-30	-30
TEC1xUPC2			-31	(30) (29)
TEC1xYER130C			(30) (32)
TYE7xUME6		-35		-29
TYE7xYER184C		-35
TYE7xYJL103C		-35
UGA3xYPL230W			(29) (30) (31)
UME6xYPL230W			(30) (31)
XBP1xYBL054W			(31) (32)
YDR026CxYER130C			-29
YDR026CxYER184C			(29) (32)
YDR026CxYJL103C			(29) (32)
YDR026CxYPL230W			(30) (31) (32)	-30
YER130CxZMS1			(30) (31)	(30) (29)
YER184CxYJL103C			-32
YER184CxZMS1			-31
YPL230WxZMS1			(30) (31) (32)	-30
YRM1xZMS1			-30
ABF1xAFT2
ABF1xCRZ1
ABF1xGIS1
ABF1xHAP3
ABF1xMET28
ABF1xMIG3
ABF1xPHO4
ABF1xRSC3
ABF1xRSC30
ABF1xSKO1
ABF1xSTB2
ABF1xSTP2
ABF1xYJL103C
ABF1xYLL054C
ABF1xZMS1
ACA1xOPI1
ACA1xRSC3
ACA1xYER184C
ACA1xYJL103C
ACA1xYLL054C
ACE2xMET31
AFT2xMET31
ARG81xOPI1
ARG81xRSC3
ARG81xRSC30
ARG81xSTB4
ARG81xUME6
ARO80xMIG1
ARO80xRDR1
ARO80xRDS1
ARO80xRSC3
ARO80xSTB4
ARO80xSUT1
ARO80xYER184C
ARR1xNHP6B
ASH1xDAL82
ASH1xNHP10
ASH1xRSC3
AZF1xECM23
AZF1xEDS1
CAD1xUSV1
CAD1xYKL222C
CAT8xLYS14
CAT8xOPI1
CAT8xREB1
CAT8xSTB1
CAT8xSTB2
CAT8xYBL054W
CAT8xYDR520C
CBF1xDAL82
CBF1xRSC3
CBF1xTBF1
CBF1xYLL054C
CEP3xSTB3
CIN5xHMRA2
CIN5xREB1
CIN5xYDR026C
CRZ1xPDR1
CRZ1xSWI5
CST6xNDD1
CUP9xECM23
CUP9xGAT3
DAL82xEDS1
DAL82xOPI1
DAL82xSTB2
DAL82xSTB3
ECM23xMET32
EDS1xRDR1
EDS1xSTP1
EDS1xYRM1
FHL1xOPI1
FHL1xSTP2
GAL4xGIS1
GAL4xRSC3
GAL4xSUT1
GAL4xYJL103C
GAL4xYPL230W
GAL80xPDR1
GAL80xRSC3
GAT3xRSC30
GAT4xMET32
GCR2xRDR1
GCR2xRFX1
GIS1xMSN2
GIS1xREB1
GIS1xYER130C
GIS1xYLL054C
GSM1xYJL103C
GTS1xMET4
HAC1xMBP1
HAC1xSUT1
HAP1xNHP10
HAP1xPDR3
HAP1xUGA3
HAP2xRSC3
HAP4xRSC3
HAP5xUGA3
HAP5xYBL054W
HCM1xNDD1
HMRA2xMATALPHA2
HMRA2xNHP6A
HMRA2xSPT15
IME1xSKN7
IME1xSTB2
IME1xYLL054C
INO2xPHD1
INO2xPHO4
INO2xYLL054C
INO4xSTB2
INO4xYDR026C
LEU3xRSC3
LEU3xTYE7
LYS14xMCM1
LYS14xSKN7
MATALPHA2xNHP6A
MATALPHA2xSPT15
MATALPHA2xTYE7
MBP1xRDS2
MBP1xRSC3
MBP1xSUM1
MCM1xNHP10
MCM1xPDR1
MCM1xRSC3
MCM1xSIP4
MCM1xSUT1
MCM1xYLL054C
MET28xRSC3
MET28xTYE7
MET31xRDS1
MET4xRSC3
MIG1xNHP10
MIG1xRDS2
MIG1xREB1
MIG1xRSC3
MIG1xRSC30
MIG1xYBL054W
MIG1xYLL054C
MIG2xSUT2
MIG2xYAP7
MIG2xYJL103C
MIG3xRDS2
MIG3xREB1
MIG3xYDR026C
MIG3xYLL054C
MSN2xRGM1
MSN2xYPL230W
MSN4xREB1
NDD1xRSC3
NDD1xRSC30
NDD1xSTP1
NDD1xSTP2
NDT80xSKN7
NHP10xPDR8
NHP10xRSC3
NHP10xRSC30
NHP10xYBL054W
NHP10xYPR196W
NHP6AxRLM1
NRG1xRDS1
OAF1xTYE7
OAF1xYJL103C
OPI1xRDS2
OPI1xSTP3
OPI1xYDR026C
OPI1xYER184C
OPI1xYJL103C
PBF2xRTG1
PBF2xXBP1
PBF2xYBL054W
PDR1xRDS2
PDR1xRTG3
PDR1xSKN7
PDR1xSTB2
PDR1xSTB4
PDR1xYLL054C
PDR3xSKN7
PDR3xSTB5
PDR3xTYE7
PDR8xRSC3
PDR8xRSC30
PDR8xSTB1
PHD1xRSC30
PHD1xYDR026C
PHO4xRDS1
PHO4xREB1
PHO4xSTB2
PHO4xTBF1
PHO4xYLL054C
PHO4xYRM1
RAP1xYLL054C
RDR1xRGT1
RDR1xRSC3
RDR1xRSC30
RDR1xSKN7
RDR1xYRM1
RDS1xSWI6
RDS1xXBP1
RDS1xYLL054C
RDS2xSNT2
RDS2xSTB3
RDS2xYDR026C
REB1xRSC3
REB1xRSC30
REB1xSNT2
REB1xSUT1
REB1xTYE7
REB1xYDR026C
REB1xYJL103C
REB1xYPL230W
REB1xYRR1
REB1xZMS1
RFX1xRSC3
RGM1xYLL054C
RGT1xSTB1
RGT1xSUT2
RLM1xSPT15
RPH1xSTP3
RSC30xRSC3					-59
RSC30xSKN7
RSC30xSTB2
RSC30xSTP1
RSC30xSTP2
RSC30xUGA3
RSC30xYER051W
RSC30xYER184C
RSC30xYJL103C
RSC3xSTB1
RSC3xSTB2
RSC3xSUT2
RSC3xSWI4
RSC3xTHI2
RSC3xUGA3
RSC3xUME6
RSC3xYBL054W
RSC3xYDR026C
RSC3xYER051W
RSC3xYER184C
RSC3xYJL103C
SKN7xYBL054W
SKN7xYDR026C
SKN7xYLL054C
SKN7xYRM1
SNT2xSTB2
SNT2xYER184C
STB1xYLL054C
STB2xTBF1
STB2xYJL103C
STB5xYER184C
STB5xYJL103C
STP1xSTP3
STP1xYDR026C
STP2xYLL054C
SUT1xYDR026C
SUT1xYLL054C
SUT2xYJL103C
SWI4xYLL054C
SWI5xYLL054C
TBF1xYRR1
TYE7xUGA3
TYE7xYDR026C
TYE7xYDR520C
TYE7xYLL054C
TYE7xYRM1
TYE7xYRR1
UGA3xYLL054C
UME6xYDR026C
UME6xYLL054C
YBL054WxYLL054C
YDR026CxYLL054C
YDR026CxZMS1
YDR520CxZMS1
YER130CxYPL230W
YER184CxYLL054C
YER184CxYRM1
YJL103CxYLL054C
YJL103CxYRM1
YKL222CxYRM1
YLL054CxYPL230W
YLL054CxZMS1
